# Supplementary material for: Cronobacter sakazakii infection implicates multifaceted neuro-immune regulatory pathways of Caenorhabditis elegans
Source: Royal Society of Chemistry journal article supplement (doi:10.1039/d3mo00167a), 2023-09-28
Supplement: d3mo00167a2.xlsx [file d3mo00167a2.xlsx]

## Sheet: Protein Summary Details
Spectrum Mill - Protein Peptide/Summary
Results Shown Filtered by Validation Category: sequence-not-validated
Data Directory: msdataSM\ECOLIOP5024HA - SpecFeatures read
Retrieving all hits from tagSummary file.
all hits read from tagSummary file num hits: 170
original hits subset determined from files: 91 Files: 91 Hits: 158
Data Directory: msdataSM\ECOLIOP5024HC - SpecFeatures read
Retrieving all hits from tagSummary file.
all hits read from tagSummary file num hits: 144
original hits subset determined from files: 80 Files: 80 Hits: 143
Data Directory: msdataSM\ECOLIOP5024HB - SpecFeatures read
Retrieving all hits from tagSummary file.
all hits read from tagSummary file num hits: 179
original hits subset determined from files: 82 Files: 82 Hits: 175
beginning to assemble proteins .... proteins assembled 0.015954 sec
proteins filtered by distinct peptides 0.003314 sec
proteins filtered by score
calculated protein coverage maps 0.124293 sec
beginning to roll up 299 proteins into groups ...
Sorted peptides by length to accelerate peptide roll up 0.004164 sec
completed primary peptide roll up 3029 sequence comparisons 0.049493 sec
completed post roll up subgrouping and sorting 0.003713 sec
Finished protein roll up into 175 groups 0.058592 sec
protein groups ready for display
proteinGroupingMethod: oneSharedPeptideSubgrouped Subgroups expanded 6.89e-002 sec
175 Protein Groups listed - Total Proteins: 296
Group	Subgroup	Spectra	Distinct	Distinct	% AA	Total	Protein MW	Protein	Species	Database	Protein Name
(#)	(#)	(#)	Peptides	Summed	Coverage	Protein	(Da)	pI		Accession #
			(#)	MS/MS Search		Spectral
				Score		Intensity
1	1.1	12	4	43.29	7.9	126000	42137.4	5.3	CAEEL	P0DM41	Actin-1
1	1.1	12	4	43.29	7.9	126000	42137.4	5.3	CAEEL	P0DM42	Actin-3
1	1.1	12	4	43.29	7.9	126000	42119.3	5.29	CAEEL	P10984	Actin-2
1	1.1	12	4	43.29	7.9	126000	42119.3	5.3	CAEEL	P10986	Actin-4
1	1.1	12	4	43.29	8.2	126000	40653.7	5.56	CAEEL	Q6A8K1	Actin-4
1	1.1	12	4	43.29	9	126000	37506.2	5.37	CAEEL	Q95ZL1	Actin-4
2	2.1	7	2	22.04	4.6	28000	47543.9	9.37	CAEEL	G8JY74	Elongation factor 1-alpha
2	2.1	7	2	22.04	4.3	28000	51123.9	9.35	CAEEL	P53013	Elongation factor 1-alpha
3	3.1	4	1	16.18	1.2	1690000	53610.1	6.17	CAEEL	Q09400	Uncharacterized protein F58F12.3
4	4.1	3	1	14.97	5.4	270000	40860	5.86	CAEEL	Q17930	Uncharacterized protein
5	5.1	2	1	14	0.1	45300	461741	5.2	CAEEL	H2L075	KETtiN (Drosophila actin-binding) homolog
5	5.1	2	1	14	0.1	45300	474320	5.25	CAEEL	Q5PY59	KETtiN (Drosophila actin-binding) homolog
5	5.1	2	1	14	0.1	45300	469691	5.23	CAEEL	Q8MXD8	KETtiN (Drosophila actin-binding) homolog
5	5.1	2	1	14	0.1	45300	471245	5.32	CAEEL	Q9NL87	KETtiN (Drosophila actin-binding) homolog
5	5.1	2	1	14	0.1	45300	553088	5.47	CAEEL	V6CJB8	KETtiN (Drosophila actin-binding) homolog
5	5.1	2	1	14	0.1	45300	482938	5.27	CAEEL	V6CKH1	KETtiN (Drosophila actin-binding) homolog
5	5.1	2	1	14	0.1	45300	557717	5.48	CAEEL	V6CLP5	KETtiN (Drosophila actin-binding) homolog
5	5.1	2	1	14	0.1	45300	544469	5.45	CAEEL	V6CLT3	KETtiN (Drosophila actin-binding) homolog
5	5.1	2	1	14	0.1	45300	549098	5.46	CAEEL	V6CLU0	KETtiN (Drosophila actin-binding) homolog
5	5.1	2	1	14	0.1	45300	478309	5.26	CAEEL	V6CLU5	KETtiN (Drosophila actin-binding) homolog
6	6.1	5	1	13.45	1.8	93100	38009.2	8.8	CAEEL	V6CLB7	G Protein, Alpha subunit
6	6.1	5	1	13.45	1.8	93100	37733.9	8.52	CAEEL	V6CLF3	G Protein, Alpha subunit
7	7.1	2	1	12.95	4.2	19800	45367.3	8.38	CAEEL	Q22401	Zinc metalloproteinase-like protein nas-21
8	8.1	6	1	12.83	1	697000	63688.4	5.62	CAEEL	Q9N4P3	Uncharacterized protein
9	9.1	1	1	12.76	0.9	69000	109608	4.37	CAEEL	Q09560	Uncharacterized protein F36G3.1
10	10.1	3	1	12.7	3.2	183000	31791.1	9.38	CAEEL	G5EFI9	Checkpoint protein
11	11.1	4	1	12.09	2.7	277000	74997.9	8.26	CAEEL	O62139	Acyl-coenzyme A oxidase
12	12.1	1	1	11.36	1.6	18800	67827.4	7.75	CAEEL	O18256	Uncharacterized protein
13	13.1	1	1	11	3.5	112000	69278	7.22	CAEEL	Q22802	WHiTe (Drosophila) related ABC transporter
14	14.1	2	2	10.33	10.4	82300	22398.9	4.75	CAEEL	Q21392	Uncharacterized protein
15	15.1	3	1	10.29	1	929000	55271.1	8.69	CAEEL	H2KZ09	Serpentine Receptor, class SX
15	15.1	3	1	10.29	1	929000	55303.8	5.75	CAEEL	O16626	Uncharacterized protein
15	15.1	3	1	10.29	1.4	929000	40443.7	7.83	CAEEL	Q18649	Double-Strand Break factor
15	15.1	3	1	10.29	0.4	929000	131610	9.31	CAEEL	Q20878	Uncharacterized protein
15	15.1	3	1	10.29	3.5	929000	16407.1	7.92	CAEEL	Q9N3I5	Uncharacterized protein
15	15.1	3	1	10.29	1	929000	55214.2	9.59	CAEEL	Q9XTB5	LEM protein 2
16	16.1	2	1	10.23	2.2	25600	35646.7	9.43	CAEEL	Q7YXD2	Delta-like protein
17	17.1	1	1	10.1	4.6	71800	46529.3	8.77	CAEEL	Q19683	Uncharacterized protein F21D5.5
18	18.1	1	1	9.98	2.8	65300	29126.7	6.24	CAEEL	Q19812	Uncharacterized protein
19	19.1	1	1	9.91	2.6	2720	80278.2	8.64	CAEEL	Q21153	Probable calcium-binding mitochondrial carrier K02F3.2
20	20.1	3	1	9.74	1.6	55200	43108.5	6.16	CAEEL	H2L0L6	Nuclear Hormone Receptor family
21	21.1	1	1	9.73	5.5	45200	31152.8	9.58	CAEEL	Q18611	Uncharacterized protein
22	22.1	2	1	9.71	2.2	230000	39478.2	6.48	CAEEL	G5EGG8	DNA repair protein RAD51 homolog
22	22.1	2	1	9.71	2.2	230000	40081.9	6.74	CAEEL	L8E822	DNA repair protein RAD51 homolog
22	22.1	2	1	9.71	2	230000	43966.3	7.18	CAEEL	Q95Q25	DNA repair protein RAD51 homolog
23	23.1	1	1	9.21	2	5790	69685.1	6.48	CAEEL	H2L034	Peroxisomal Membrane Protein related
23	23.1	1	1	9.21	2.1	5790	65739.8	6.09	CAEEL	H2L035	Peroxisomal Membrane Protein related
24	24.1	1	1	9.17	1.2	56500	97143.2	9.05	CAEEL	A0A1X7RBL4	Arf-GAP with ANK repeat and PH domain-containing protein cnt-2
24	24.1	1	1	9.17	0.9	56500	123935	9.35	CAEEL	Q9XX14	Arf-GAP with ANK repeat and PH domain-containing protein cnt-2
25	25.1	1	1	9.16	1.9	266000	29261.6	9.19	CAEEL	O62427	Uncharacterized protein
25	25.1	1	1	9.16	0.9	266000	60893.5	5.15	CAEEL	Q22560	Importin subunit alpha-1
26	26.1	1	1	9.06	12.6	116000	17180.2	7.84	CAEEL	P91110	Uncharacterized protein
27	27.1	3	1	9.04	1.5	957000	55695.2	11.42	CAEEL	Q09633	RNase H
28	28.1	1	1	9	1.9	19600	48273.5	6.91	CAEEL	P34454	Uncharacterized protein F54F2.9
29	29.1	2	1	8.94	1.8	91800	78385	9.23	CAEEL	Q8MNV7	SWI/SNF-related matrix-associated actin-dependent regulator of chromatin subfamily A-like protein 1 homolog
30	30.1	1	1	8.82	4.8	43700	26738.2	8.71	CAEEL	P90779	Uncharacterized protein
31	31.1	1	1	8.78	3.1	3940	64784.1	9.2	CAEEL	Q9BHL0	Uncharacterized protein
32	32.1	1	1	8.77	0.5	23300	150936	8.44	CAEEL	G5EDC2	Uncharacterized protein
33	33.1	1	1	8.68	4.1	42000	40498.1	6.48	CAEEL	P34293	Uncharacterized F-box protein C05B5.5
34	34.1	1	1	8.65	4.3	18300	61967	9.57	CAEEL	Q95Y89	Pescadillo homolog
35	35.1	1	1	8.62	0.6	19800	164186	5.9	CAEEL	P90757	Uncharacterized protein
36	36.1	1	1	8.55	2.5	93100	36146.5	8.94	CAEEL	G8JYA7	Nuclear hormone receptor family member nhr-1
36	36.1	1	1	8.55	1.7	93100	51639.3	8.8	CAEEL	Q21878	Nuclear hormone receptor family member nhr-1
37	37.1	1	1	8.28	1.2	19400	120964	5.11	CAEEL	G5ECQ3	Serine/threonine-protein kinase sel-5
38	38.1	2	2	8.21	1.8	30100	164552	6.25	CAEEL	A0A1I6CMB8	Receptor-type tyrosine-protein phosphatase
38	38.1	2	2	8.21	1.9	30100	161950	6.03	CAEEL	H2KZM6	Receptor-type tyrosine-protein phosphatase
39	39.1	2	1	7.88	1	18300	93205.6	5.39	CAEEL	O45373	Uncharacterized protein
40	40.1	1	1	7.87	2.1	8150	33460.4	10.05	CAEEL	Q5CZ33	Serpentine Receptor, class BC (Class B-like)
41	41.1	1	1	7.85	1.2	2700	63013.4	4.16	CAEEL	O17687	NASP (Human Nuclear Autoantigenic Sperm Protein) homolog
42	42.1	1	1	7.81	3.4	710	23107.8	10.93	CAEEL	Q27389	60S ribosomal protein L13a
43	43.1	1	1	7.79	9.6	1480	21464.7	9.74	CAEEL	Q21092	Uncharacterized protein
44	44.1	1	1	7.68	1.7	46400	85072.4	8.52	CAEEL	G5EEA7	Anion transporter SULP-4
45	45.1	2	1	7.39	1.6	825000	40893.3	8.99	CAEEL	O44150	Uncharacterized protein
46	46.1	1	1	7.35	5.7	17700	19628	5.38	CAEEL	A0A0K3ARH7	Serine palmitoyltransferase 1
46	46.1	1	1	7.35	2.1	17700	52426.2	6.63	CAEEL	P91079	Serine palmitoyltransferase 1
47	47.1	1	1	7.28	11.4	15500	15255.2	7.03	CAEEL	Q9TXQ6	Uncharacterized protein
48	48.1	1	1	7.25	12	5980	14446.1	9.1	CAEEL	Q94045	Putative RNA polymerase II transcriptional coactivator
49	49.1	1	1	7.07	3	3550	24665	6.33	CAEEL	Q19660	Uncharacterized protein
50	50.1	2	1	7.05	3.9	66000	42523.7	10.31	CAEEL	Q7YXB5	Uncharacterized protein
51	51.1	3	1	7	6.7	23500	23074.6	9.51	CAEEL	D2YW13	Uncharacterized protein
52	52.1	1	1	6.85	9.4	19800	11421.3	10.29	CAEEL	Q9U374	Uncharacterized protein
53	53.1	1	1	6.81	6.1	1560	31114.9	5.62	CAEEL	P83351	Soluble NSF attachment protein 29
54	54.1	1	1	6.63	1.3	69000	74979.6	7.85	CAEEL	A5Z2V0	Pol II C-terminal Interaction Domain Suppressor
54	54.1	1	1	6.63	1.3	69000	75254.9	7.85	CAEEL	A5Z2V1	Pol II C-terminal Interaction Domain Suppressor
54	54.1	1	1	6.63	1.3	69000	74391	8.74	CAEEL	Q8I4J5	Pol II C-terminal Interaction Domain Suppressor
54	54.1	1	1	6.63	1.3	69000	74635.2	8.3	CAEEL	Q9XVN9	Pol II C-terminal Interaction Domain Suppressor
55	55.1	1	1	6.62	1.7	2760	51635.7	7.99	CAEEL	A7UQ11	NeuRonal IGCAM
55	55.1	1	1	6.62	1.6	2760	54546.5	6.2	CAEEL	C6KRM7	NeuRonal IGCAM
55	55.1	1	1	6.62	1.8	2760	48399.3	5.51	CAEEL	H2FLI7	NeuRonal IGCAM
55	55.1	1	1	6.62	1.8	2760	47917.9	9.11	CAEEL	H2FLI8	NeuRonal IGCAM
55	55.1	1	1	6.62	2.8	2760	31718.4	6.14	CAEEL	Q93350	NeuRonal IGCAM
55	55.1	1	1	6.62	1.9	2760	45744.1	6.79	CAEEL	Q9NAR0	NeuRonal IGCAM
56	56.1	1	1	6.61	7.9	57100	12029.7	10.56	CAEEL	Q09558	Uncharacterized protein
57	57.1	1	1	6.57	1.6	298000	57477.6	9.61	CAEEL	Q95VX5	CUX-7 (Fragment)
57	57.1	1	1	6.57	1.6	298000	59258.5	9.79	CAEEL	Q95YE8	Clk-2 Upstream, human gene XE7 related
58	58.1	1	1	6.56	1.5	2660	92298.3	5.15	CAEEL	Q21854	Influenza Virus NS1a (A) binding protein homolog
59	59.1	1	1	6.43	4.1	5900	48992.9	8.75	CAEEL	O16723	Uncharacterized protein
60	60.1	1	1	6.42	0.6	69000	182575	8.95	CAEEL	Q9U263	Histone-lysine N-methyltransferase set-26
61	61.1	1	1	6.33	3.3	15200	36104.4	9.18	CAEEL	P90991	Uncharacterized protein
62	62.1	1	1	6.31	6.3	1620	22346	5.26	CAEEL	A0A2I2LDX7	Glucosamine 6-phosphate N-acetyltransferase
62	62.1	1	1	6.31	2	1620	67648.3	5.01	CAEEL	Q17765	JuMonJi (Transcription factor) Domain protein
63	63.1	1	1	6.31	3.3	103000	48052.4	8.83	CAEEL	Q22710	Zinc metalloproteinase nas-26
64	64.1	2	1	6.27	15.3	0	13532.4	6.64	CAEEL	Q09506	Uncharacterized protein C45G9.7
65	65.1	2	1	6.26	2.5	2580	34526.6	9.9	CAEEL	G5EFU2	Adenine Nucleotide Translocator
65	65.1	2	1	6.26	2.5	2580	34554.7	9.9	CAEEL	G5EFW8	Adenine Nucleotide Translocator
65	65.1	2	1	6.26	2.6	2580	33542.1	9.64	CAEEL	O01813	Adenine Nucleotide Translocator
65	65.1	2	1	6.26	2.6	2580	33215.3	9.86	CAEEL	O45865	Adenine Nucleotide Translocator
66	66.1	1	1	6.09	1.8	10600	84656.8	8.97	CAEEL	A0A0K3ARE1	Poly(A) RNA polymerase gld-2
66	66.1	1	1	6.09	1.6	10600	94789	8.7	CAEEL	A0A0K3AWQ7	Poly(A) RNA polymerase gld-2
66	66.1	1	1	6.09	1.2	10600	125237	9.4	CAEEL	O17087	Poly(A) RNA polymerase gld-2
67	67.1	2	1	6.07	1.6	215000	55502.8	6.31	CAEEL	Q09989	SynDaPiN (Synaptic dynamin binding protein) homolog
67	67.1	2	1	6.07	1.6	215000	56251.7	6.31	CAEEL	Q6AHQ8	SynDaPiN (Synaptic dynamin binding protein) homolog
68	68.1	1	1	6.05	4.1	29500	25441.8	10.96	CAEEL	A0A078BPN3	Serpentine Receptor, class V
68	68.1	1	1	6.05	2.6	29500	39520.8	9.91	CAEEL	A0A078BS80	Serpentine Receptor, class V
68	68.1	1	1	6.05	4.2	29500	24743	10.68	CAEEL	Q2HQL3	Serpentine Receptor, class V
68	68.1	1	1	6.05	2.7	29500	38822	9.74	CAEEL	Q9U306	Serpentine Receptor, class V
69	69.1	1	1	6.05	6.9	11400	20595.3	9.56	CAEEL	Q27GV2	Uncharacterized protein ZK688.12
70	70.1	1	1	5.99	1.8	4590	38263.4	8.86	CAEEL	B6EU60	Uncharacterized protein
70	70.1	1	1	5.99	2	4590	33261.7	7.9	CAEEL	Q20928	Uncharacterized protein
71	71.1	3	1	5.96	2.4	187000	94171.3	6.19	CAEEL	O17744	Uncharacterized protein
72	72.1	1	1	5.86	6.6	8080	21945.5	10.12	CAEEL	P34264	Probable 39S ribosomal protein L11, mitochondrial
73	73.1	1	1	5.79	6	2160	36212.6	8.58	CAEEL	H2KY79	Major sperm protein
73	73.1	1	1	5.79	3.3	2160	66062.3	8.61	CAEEL	Q10956	Major sperm protein
74	74.1	1	1	5.66	1.2	109000	64769.2	8.32	CAEEL	Q9N4M3	AcetylCholine Receptor
75	75.1	1	1	5.63	4.8	14400	48062.5	5.31	CAEEL	Q17431	RNA polymerase-associated protein LEO1
76	76.1	1	1	5.62	1.5	15500	136188	9.04	CAEEL	D7SFK4	Lin-12 and Glp-1 X-hybridizing
76	76.1	1	1	5.62	1	15500	210435	9.17	CAEEL	H2KZ94	Lin-12 and Glp-1 X-hybridizing
77	77.1	1	1	5.53	0.5	58700	262877	5.02	CAEEL	P34367	Uncharacterized protein C50C3.2
78	78.1	3	1	5.52	2.1	339000	37959.1	9.98	CAEEL	F5GU62	Uncharacterized protein
79	79.1	1	1	5.49	1.8	18700	62410.7	6.71	CAEEL	Q95XJ7	ImmunoGlobulin-like Cell adhesion Molecule family
80	80.1	1	1	5.49	0.5	28300	123571	4.61	CAEEL	Q9N5V3	IMportin Beta family
81	81.1	1	1	5.48	2.6	5660	53715.9	6.1	CAEEL	O61715	Innexin-19
82	82.1	1	1	5.46	0.8	2750	118000	5.31	CAEEL	H2KZ73	NOmpA Homolog (Drosophila nompA: no mechanoreceptor potential A)
82	82.1	1	1	5.46	0.8	2750	118489	5.34	CAEEL	H8W3Y1	NOmpA Homolog (Drosophila nompA: no mechanoreceptor potential A)
82	82.1	1	1	5.46	0.8	2750	118413	5.31	CAEEL	Q8T3B7	NOmpA Homolog (Drosophila nompA: no mechanoreceptor potential A)
83	83.1	1	1	5.45	5.5	2250	49192.3	6.05	CAEEL	A0A3B1E9Z3	Uncharacterized protein
83	83.1	1	1	5.45	5.7	2250	47867.8	6.1	CAEEL	G5EBG8	Uncharacterized protein
83	83.1	1	1	5.45	5.6	2250	48518.5	5.96	CAEEL	G5EEG5	Uncharacterized protein
83	83.1	1	1	5.45	12.7	2250	20995.7	9.33	CAEEL	H9G305	Uncharacterized protein
84	84.1	1	1	5.37	1.7	33100	51746.1	6.51	CAEEL	Q9TZE1	Uncharacterized protein
85	85.1	1	1	5.33	1.9	1980	70512.1	5.41	CAEEL	M1ZJY1	Serine/threonine-protein kinase spk-1
85	85.1	1	1	5.33	1.1	1980	113438	4.63	CAEEL	Q03563	Serine/threonine-protein kinase spk-1
86	86.1	1	1	5.26	1.8	413000	37978.9	7.82	CAEEL	H2KZ70	Uncharacterized protein
86	86.1	1	1	5.26	2.8	413000	24886.9	9.17	CAEEL	H2KZ71	Uncharacterized protein
86	86.1	1	1	5.26	1.8	413000	37321.2	8.51	CAEEL	Q5WRS7	Uncharacterized protein
87	87.1	1	1	5.22	0.6	1650	231090	9.01	CAEEL	O16237	LysM Domain (Peptidoglycan binding) protein
88	88.1	1	1	5.19	2.6	5270	38552.4	6.41	CAEEL	Q18122	Uncharacterized protein
89	89.1	4	1	5.13	8.2	5400	19593.1	9.56	CAEEL	Q19165	FMRFamide-like neuropeptides 6
90	90.1	1	1	5.13	2.1	58700	63137.1	8.73	CAEEL	Q21815	Nucleoside-diphosphatase mig-23
91	91.1	1	1	5.08	1.3	31700	117666	4.92	CAEEL	G5EC21	Protein qua-1
92	92.1	2	1	5.03	1.9	8760	40403	7.83	CAEEL	D3NQ95	Uncharacterized protein
92	92.1	2	1	5.03	2.1	8760	36811	7.15	CAEEL	D3NQ96	Uncharacterized protein
92	92.1	2	1	5.03	1.3	8760	61416.1	6.15	CAEEL	O62456	Uncharacterized protein
92	92.1	2	1	5.03	1.7	8760	47312.2	5.89	CAEEL	Q08I44	Uncharacterized protein
93	93.1	1	1	5.01	2.4	10000	47934.4	9.62	CAEEL	O76562	Uncharacterized protein
94	94.1	2	1	4.98	2.1	206000	80126.6	8.61	CAEEL	Q18563	Regulator of G-protein signaling rgs-6
95	95.1	1	1	4.97	4.8	11200	39964.2	9.58	CAEEL	Q9U8C8	Serpentine Receptor, class W
96	96.1	1	1	4.96	0.5	28500	123979	5.31	CAEEL	E2JKY8	DyNactin Complex component
96	96.1	1	1	4.96	0.4	28500	151566	5.84	CAEEL	E2JKZ0	DyNactin Complex component
96	96.1	1	1	4.96	0.4	28500	145860	5.52	CAEEL	L8E938	DyNactin Complex component
96	96.1	1	1	4.96	0.4	28500	148600	5.7	CAEEL	L8EC32	DyNactin Complex component
96	96.1	1	1	4.96	0.4	28500	148827	5.64	CAEEL	Q23542	DyNactin Complex component
97	97.1	1	1	4.93	16.1	1130	11804.1	6.13	CAEEL	H2L0S3	Serine/threonine-protein phosphatase 2A activator
97	97.1	1	1	4.93	4.5	1130	43223.5	6.14	CAEEL	Q9BL35	Serine/threonine-protein phosphatase 2A activator
98	98.1	1	1	4.88	3.9	11300	29865.5	9.33	CAEEL	Q23142	Uncharacterized protein
99	99.1	1	1	4.86	7.5	112000	11357	10.22	CAEEL	Q9BLC2	Uncharacterized protein
100	100.1	1	1	4.84	3.4	75400	63699.3	8.56	CAEEL	Q9GRV2	Ubiquitinyl hydrolase 1
101	101.1	1	1	4.72	2.5	31100	46791.3	5.98	CAEEL	Q18020	Heme Responsive protein
102	102.1	1	1	4.67	0.8	25700	92512.7	6.34	CAEEL	Q9XXS6	Uncharacterized protein
103	103.1	1	1	4.58	1.6	9460	95989.7	5.29	CAEEL	A0A163UTE6	Heavy chain, Unconventional Myosin
103	103.1	1	1	4.58	1.6	9460	96265	5.29	CAEEL	A0A168H541	Heavy chain, Unconventional Myosin
103	103.1	1	1	4.58	1.7	9460	91650.8	5.42	CAEEL	A0A168H5A5	Heavy chain, Unconventional Myosin
103	103.1	1	1	4.58	1.7	9460	91375.5	5.42	CAEEL	A0A168H5E2	Heavy chain, Unconventional Myosin
103	103.1	1	1	4.58	1.7	9460	89685.6	5.45	CAEEL	A0A168H5H9	Heavy chain, Unconventional Myosin
103	103.1	1	1	4.58	0.7	9460	208622	8.61	CAEEL	G8JY81	Heavy chain, Unconventional Myosin
103	103.1	1	1	4.58	0.7	9460	212110	8.98	CAEEL	Q17383	Hum-2
103	103.1	1	1	4.58	0.7	9460	208347	8.61	CAEEL	Q95ZU1	Heavy chain, Unconventional Myosin
104	104.1	1	1	4.55	4.1	1300	39088.7	9.8	CAEEL	P92002	Serpentine receptor class delta-19
105	105.1	1	1	4.54	2.3	5350	35214.6	5.46	CAEEL	Q10905	Cell death-related nuclease 4
106	106.1	1	1	4.5	1	8380	84811	4.48	CAEEL	O17838	CLaSPin homolog
107	107.1	1	1	4.47	3.3	3910	30920.5	9.06	CAEEL	Q17892	Uncharacterized protein
108	108.1	1	1	4.43	6.9	6590	23077.7	9.43	CAEEL	Q19830	Uncharacterized protein
109	109.1	2	1	4.41	1	15700	66960.1	7.85	CAEEL	Q5FC36	Prion-like-(Q/N-rich)-domain-bearing protein
109	109.1	2	1	4.41	1	15700	67187.3	7.85	CAEEL	Q9XV50	Prion-like-(Q/N-rich)-domain-bearing protein
110	110.1	1	1	4.37	6.3	109000	24524.2	5.42	CAEEL	O17594	Uncharacterized protein
111	111.1	1	1	4.34	1.5	11500	56225.2	4.84	CAEEL	P34423	Uncharacterized protein F44B9.2
112	112.1	1	1	4.3	0.1	24400	388048	5.04	CAEEL	A0A1N7SYN2	Uncharacterized protein
112	112.1	1	1	4.3	0.1	24400	559947	5.13	CAEEL	A0A1N7SYN7	Uncharacterized protein
112	112.1	1	1	4.3	0.1	24400	562067	5.1	CAEEL	A0A1N7SYN9	Uncharacterized protein
112	112.1	1	1	4.3	0.1	24400	573884	5.12	CAEEL	A0A1N7SYP3	Uncharacterized protein
112	112.1	1	1	4.3	0.1	24400	401341	5.03	CAEEL	A0A1N7SYQ0	Uncharacterized protein
112	112.1	1	1	4.3	0.1	24400	548130	5.1	CAEEL	A0A1N7SYR7	Uncharacterized protein
112	112.1	1	1	4.3	0.1	24400	504107	5.13	CAEEL	G5ECG5	Uncharacterized protein
112	112.1	1	1	4.3	0.1	24400	564604	5.1	CAEEL	G5EDD3	Uncharacterized protein
112	112.1	1	1	4.3	0.1	24400	563365	5.1	CAEEL	G5EFM4	VAB-10B protein
112	112.1	1	1	4.3	0.1	24400	401944	4.93	CAEEL	Q86NF7	VAB-10B protein
113	113.1	1	1	4.29	2.5	11200	64023.3	6.61	CAEEL	O45074	Uncharacterized protein
114	114.1	1	1	4.22	5.1	3330	30976.8	5.31	CAEEL	P91061	Uncharacterized protein
115	115.1	1	1	4.14	1.7	6820	52848.2	9.47	CAEEL	Q09436	Zinc finger protein mex-6
115	115.1	1	1	4.14	1.7	6820	53218.7	8.9	CAEEL	Q9XUB2	Zinc finger protein mex-5
116	116.1	1	1	4.12	0.7	24400	308806	8.94	CAEEL	Q95Q95	Target of rapamycin homolog
117	117.1	1	1	4.1	14.2	6430	9244.7	11.46	CAEEL	Q7YWY8	Ribosomal protein
118	118.1	1	1	4.09	1.6	1160	92355.2	6.3	CAEEL	A0A0K3AQM0	LIM domain family
118	118.1	1	1	4.09	1.7	1160	89057.6	6.44	CAEEL	A0A0K3ATK8	LIM domain family
118	118.1	1	1	4.09	2	1160	73305.1	6.37	CAEEL	G5ECN3	LIM domain family
118	118.1	1	1	4.09	2.1	1160	71819.5	9.36	CAEEL	G5EDJ5	LIM domain family
118	118.1	1	1	4.09	2.3	1160	66509.3	7.84	CAEEL	G5EEA4	LIM domain family
118	118.1	1	1	4.09	1.9	1160	76952.2	6.36	CAEEL	G5EF39	LIM domain family
118	118.1	1	1	4.09	2.6	1160	58225.3	7.83	CAEEL	O17833	LIM domain family
118	118.1	1	1	4.09	4.4	1160	35127.3	8.94	CAEEL	Q3S1I9	LIM domain family
119	119.1	1	1	4.06	1.2	118000	57751.2	7.89	CAEEL	Q27487	Peroxisomal catalase 1
120	120.1	1	1	4.05	1.7	784	66342.8	8.79	CAEEL	O62090	Axin-like protein pry-1
121	121.1	1	1	4	1.8	13900	44350.3	5.22	CAEEL	G5EDW7	Protein lin-8
122	122.1	1	1	3.96	3.5	7960	42720.2	6.44	CAEEL	O62034	Nuclear Hormone Receptor family
122	122.1	1	1	3.96	3.5	7960	42990.4	6.6	CAEEL	Q9GTE4	Nuclear receptor NHR-63 (Fragment)
123	123.1	1	1	3.94	1.4	14700	84914.4	9.61	CAEEL	O01497	TYRosinase
124	124.1	1	1	3.88	0.6	21000	130903	6.01	CAEEL	Q21049	Liprin-alpha
125	125.1	1	1	3.88	0.4	2210	138960	6.2	CAEEL	Q9N4H7	Coatomer subunit alpha
126	126.1	1	1	3.87	3.7	21600	49074.9	9.19	CAEEL	Q95XY8	Uncharacterized protein
127	127.1	1	1	3.83	3.6	15100	51221.1	9.13	CAEEL	O17898	Nuclear hormone receptor family member nhr-60
128	128.1	1	1	3.69	1.3	3540	60142.4	6.92	CAEEL	B1Q250	UDP-glucuronosyltransferase
128	128.1	1	1	3.69	1.3	3540	60241.6	6.92	CAEEL	H2KYQ0	UDP-glucuronosyltransferase
129	129.1	1	1	3.65	9.7	109000	15216.1	9.15	CAEEL	I2HA82	ACyLtransferase-like
130	130.1	1	1	3.62	1.4	18700	108004	6.23	CAEEL	Q4TT88	Puromycin-sensitive aminopeptidase
131	131.1	1	1	3.61	0	6920	1689639	5.01	CAEEL	A0A2I2LDV7	Titin homolog
131	131.1	1	1	3.61	0.1	6920	871997	5.62	CAEEL	A0A2I2LDV8	Titin homolog
131	131.1	1	1	3.61	0.1	6920	873632	5.62	CAEEL	A0A2I2LDW1	Titin homolog
131	131.1	1	1	3.61	0.1	6920	868607	5.63	CAEEL	A0A2I2LDX0	Titin homolog
131	131.1	1	1	3.61	0	6920	1.64214e+06	5	CAEEL	A0A2I2LG13	Titin homolog
131	131.1	1	1	3.61	0.1	6920	870242	5.63	CAEEL	A0A2I2LG61	Titin homolog
131	131.1	1	1	3.61	0	6920	2.06678e+06	4.99	CAEEL	G4SLH0	Titin homolog
132	132.1	1	1	3.59	1.9	52300	54501	8.86	CAEEL	Q20085	Membrane-associated tyrosine- and threonine-specific cdc2-inhibitory kinase wee-1.1
133	133.1	1	1	3.54	1.4	21600	38963.6	9.84	CAEEL	Q21263	PAX (Paired box) transcription factor
134	134.1	1	1	3.53	5.5	3500	24883	9.13	CAEEL	Q17958	Programmed cell death protein 10 homolog
135	135.1	1	1	3.51	5.7	18300	15642.7	6.84	CAEEL	Q20107	Peptidylprolyl isomerase
136	136.1	1	1	3.48	1	9680	135124	6.74	CAEEL	H2KY84	CAMTA (CAlModulin-binding Transcriptional activator)
136	136.1	1	1	3.48	1.1	9680	132620	6.66	CAEEL	H2KY85	CAMTA (CAlModulin-binding Transcriptional activator)
137	137.1	1	1	3.45	4.2	5230	21795.8	9.85	CAEEL	Q17919	Uncharacterized protein
138	138.1	1	1	3.44	5.2	1240	36022.6	6.81	CAEEL	Q19652	Uncharacterized protein
139	139.1	1	1	3.43	5	6940	25194.9	5.12	CAEEL	E5QCE7	DNaJ domain (Prokaryotic heat shock protein)
139	139.1	1	1	3.43	5.1	6940	24974.7	5.12	CAEEL	Q21162	DNaJ domain (Prokaryotic heat shock protein)
140	140.1	1	1	3.41	17.5	43800	9034.5	9.99	CAEEL	G3MTY9	Uncharacterized protein
141	141.1	1	1	3.38	3.8	2070	20449.7	5.27	CAEEL	Q18567	SKp1 Related (Ubiquitin ligase complex component)
142	142.1	1	1	3.36	1.3	7670	68862.5	5.12	CAEEL	Q22078	Nuclear pore complex protein Nup85
143	143.1	1	1	3.34	1.8	2450	67094.8	4.85	CAEEL	G5ECD8	DEgenerin Like
144	144.1	1	1	3.32	3.7	298000	24892.5	9.64	CAEEL	Q9XU45	Uncharacterized protein
145	145.1	1	1	3.29	0.3	7620	252644	9.2	CAEEL	Q20007	Uncharacterized protein
146	146.1	1	1	3.28	1	9780	124347	7.26	CAEEL	G5EG74	Uncharacterized protein
146	146.1	1	1	3.28	1	9780	124365	7.1	CAEEL	G5EGL3	Uncharacterized protein
147	147.1	1	1	3.24	0.6	7490	215547	9.33	CAEEL	F0IWT2	Heavy chain, Unconventional Myosin
147	147.1	1	1	3.24	0.6	7490	214179	9.28	CAEEL	H2L082	Heavy chain, Unconventional Myosin
148	148.1	1	1	3.23	0.6	7470	286129	6.73	CAEEL	E9P860	Uncharacterized protein
148	148.1	1	1	3.23	0.6	7470	258238	8.18	CAEEL	Q23388	Uncharacterized protein
149	149.1	1	1	3.18	3	3490	26976.5	9.76	CAEEL	Q8T7Z2	Uncharacterized protein
150	150.1	1	1	3.15	7.3	15500	22635.2	6.42	CAEEL	Q17984	Uncharacterized protein
151	151.1	1	1	3.14	0.6	1280	194162	6.98	CAEEL	G5ECM4	GTL-1
151	151.1	1	1	3.14	0.6	1280	192700	6.83	CAEEL	Q8IG05	Putative TRP homologous cation channel (Fragment)
152	152.1	1	1	3.08	3.3	321000	29947.4	9.74	CAEEL	Q20293	Uncharacterized protein
153	153.1	1	1	3.07	2.3	20800	39028.5	9.33	CAEEL	O44544	Seven TM Receptor
154	154.1	1	1	3.06	2.3	3720	75072.9	9.35	CAEEL	Q21572	Uncharacterized protein
155	155.1	1	1	3.06	8.3	34200	17905.7	4.89	CAEEL	Q22790	Uncharacterized protein
156	156.1	1	1	3.03	2.9	63400	31363.7	5.84	CAEEL	G4SHR1	NEPrilysin metallopeptidase family
156	156.1	1	1	3.03	5.5	63400	17076.4	6.4	CAEEL	Q95ZU0	NEPrilysin metallopeptidase family
157	157.1	1	1	3.02	0.4	2430	253154	6.24	CAEEL	G4RT15	Uncharacterized protein
157	157.1	1	1	3.02	0.4	2430	250454	6.24	CAEEL	O61825	Uncharacterized protein
158	158.1	1	1	3.01	10.8	8430	15747.8	9.3	CAEEL	Q22903	Uncharacterized protein
159	159.1	1	1	2.91	3.7	1740	37534.3	9.39	CAEEL	Q9XUV6	Uncharacterized protein
160	160.1	1	1	2.82	3.1	22300	51984.3	8.87	CAEEL	Q10052	GABA/Glycine Receptor family (See gbr)
161	161.1	1	1	2.75	4.1	1560	39834.5	5.97	CAEEL	O76655	Uncharacterized protein
162	162.1	1	1	2.71	5.1	66900	27087.4	7.97	CAEEL	Q8MXS8	Uncharacterized protein
162	162.1	1	1	2.71	5	66900	27053.6	8.75	CAEEL	Q9BL81	Uncharacterized protein
163	163.1	1	1	2.67	2.8	11100	36637.5	10.06	CAEEL	O16492	Serpentine Receptor, class T
164	164.1	1	1	2.65	0.3	11500	240205	5.08	CAEEL	Q21281	Transmembrane matrix receptor MUP-4
165	165.1	1	1	2.55	2.6	5200	55374.1	6.87	CAEEL	A0A131MB05	CUTiclin-Like
165	165.1	1	1	2.55	2.2	5200	65046.1	7.83	CAEEL	A0A131MBI8	CUTiclin-Like
166	166.1	1	1	2.45	0.5	2050	251017	8.33	CAEEL	G5EDC5	Protein-tyrosine-phosphatase
166	166.1	1	1	2.45	0.6	2050	223739	6.47	CAEEL	G5EE54	Protein-tyrosine-phosphatase
166	166.1	1	1	2.45	0.5	2050	252982	6.35	CAEEL	L8E6H9	Protein-tyrosine-phosphatase
166	166.1	1	1	2.45	1.2	2050	123904	7.03	CAEEL	L8E6L2	Protein-tyrosine-phosphatase
166	166.1	1	1	2.45	0.5	2050	248038	6.88	CAEEL	L8E6W1	Protein-tyrosine-phosphatase
166	166.1	1	1	2.45	1	2050	142100	7.59	CAEEL	L8E6Z3	Protein-tyrosine-phosphatase
166	166.1	1	1	2.45	0.5	2050	250315	6.52	CAEEL	L8E7X5	Protein-tyrosine-phosphatase
166	166.1	1	1	2.45	1	2050	138744	6.37	CAEEL	Q8I120	Protein-tyrosine-phosphatase
166	166.1	1	1	2.45	0.5	2050	247814	7.56	CAEEL	Q9BMN8	Tyrosine-protein phosphatase Lar-like
166	166.1	1	1	2.45	0.8	2050	168812	7.17	CAEEL	V6CIQ1	Protein-tyrosine-phosphatase
166	166.1	1	1	2.45	0.5	2050	247814	7.56	CAEEL	V6CJV7	Protein-tyrosine-phosphatase
167	167.1	1	1	2.43	1.8	9050	61812.3	5.94	CAEEL	Q19722	Asparagine--tRNA ligase, cytoplasmic
168	168.1	1	1	2.23	1.1	18300	80899.5	9.21	CAEEL	G5EBX9	Serine/threonine-protein phosphatase with EF-hands pef-1
169	169.1	1	1	2.21	1.8	1660	31939.3	5.59	CAEEL	G5ECU6	COLlagen
170	170.1	1	1	1.74	1.4	17500	59605.5	8.32	CAEEL	Q09623	Uncharacterized RING finger protein ZK945.4
171	171.1	1	1	1.44	2.8	30100	40941	5.77	CAEEL	Q8I4G2	Uncharacterized protein
172	172.1	1	1	1.33	1.7	2660	85898.4	5.4	CAEEL	Q95Q40	MAM (Meprin, A5-protein, PTPmu) domain protein
173	173.1	1	1	1.15	3.2	3090	46457.4	9.96	CAEEL	B3WFV2	GLoBin related
173	173.1	1	1	1.15	3.5	3090	42490	9.89	CAEEL	G5EBR4	GLoBin related
174	174.1	1	1	0.7	3.4	12700	23748.9	9.76	CAEEL	Q7YWV0	Uncharacterized protein
175	175.1	1	1	0.54	3.9	989	41881.7	4.88	CAEEL	Q95XT8	Uncharacterized protein
Totals:	458	319
Group	Subgroup	Spectra	Distinct	Distinct	% AA	Total	Protein MW	Protein	Species	Database	Protein Name
(#)	(#)	(#)	Peptides	Summed	Coverage	Protein	(Da)	pI		Accession #
			(#)	MS/MS Search		Spectral
				Score		Intensity
1	1.1	12	4	43.29	7.9	126000	42137.4	5.3	CAEEL	P0DM41
#	Filename	z	Score	Spectrum	Variable	Sequence	Sequence Map	MH+	MH+	MH+
				Intensity	Sites			Matched	Mass Shift	Error
								(Da)	(Da)	(ppm)
1	ECOLIOP5024HB.2785.2785.2	2	13.33	4690		(K)IIAPPER(K)	(K)I/I|A/P/P E/R(K)	795.472	-0.0049	-6.2
2	ECOLIOP5024HA.2806.2806.2	2	12.64	3860		(K)IIAPPER(K)	(K)I/I|A|P/P E R(K)	795.472	-0.0023	-3
3	ECOLIOP5024HA.3424.3424.2	2	12.48	5780		(K)EITALAPSTMK(I)	(K)E I|T A|L|A P S/T M/K(I)	1161.62	-0.0061	-5.2
4	ECOLIOP5024HB.2873.2873.2	2	9.33	24100		(R)LDLAGR(D)	(R)L/D|L/A/G R(D)	644.373	-0.0012	-1.8
5	ECOLIOP5024HC.3417.3417.2	2	9.11	1980		(K)EITALAPSTMK(I)	(K)E I|T/A/L/A P S/T M K(I)	1161.62	-0.0085	-7.3
6	ECOLIOP5024HC.2781.2781.2	2	8.27	6250		(K)IIAPPER(K)	(K)I I|A|P/P E R(K)	795.472	-0.0061	-7.7
7	ECOLIOP5024HC.3576.3587.2	2	8.15	14600		(R)GILTLK(Y)	(R)G I|L/T/L/K(Y)	644.434	-0.0022	-3.5
8	ECOLIOP5024HA.2797.2797.2	2	7.65	3860		(K)IIAPPER(K)	(K)I/I|A|P/P E R(K)	795.472	-0.0023	-3
9	ECOLIOP5024HB.3432.3432.2	2	7.45	7410		(K)EITALAPSTMK(I)	(K)E\I/T A/L/A P S T M/K(I)	1161.62	-0.0089	-7.6
10	ECOLIOP5024HB.2871.2871.2	2	6.79	24100		(R)LDLAGR(D)	(R)L/D|L/A/G R(D)	644.373	-0.0012	-1.8
11	ECOLIOP5024HC.2869.2869.2	2	6.48	24400		(R)LDLAGR(D)	(R)L/D|L/A/G/R(D)	644.373	-0.0027	-4.1
12	ECOLIOP5024HB.2782.2782.2	2	6.28	4690		(K)IIAPPER(K)	(K)I/I|A/P/P E R(K)	795.472	-0.0049	-6.2
Group	Subgroup	Spectra	Distinct	Distinct	% AA	Total	Protein MW	Protein	Species	Database	Protein Name
(#)	(#)	(#)	Peptides	Summed	Coverage	Protein	(Da)	pI		Accession #
			(#)	MS/MS Search		Spectral
				Score		Intensity
2	2.1	7	2	22.04	4.6	28000	47543.9	9.37	CAEEL	G8JY74
#	Filename	z	Score	Spectrum	Variable	Sequence	Sequence Map	MH+	MH+	MH+
				Intensity	Sites			Matched	Mass Shift	Error
								(Da)	(Da)	(ppm)
1	ECOLIOP5024HC.3360.3360.2	2	11.69	3080		(K)IGGIGTVPVGR(V)	(K)I|G|G\I|G T|V/P V G R(V)	1025.61	-0.0055	-5.3
2	ECOLIOP5024HB.3356.3356.2	2	11.39	5510		(K)IGGIGTVPVGR(V)	(K)I/G|G\I|G/T|V/P V G R(V)	1025.61	-0.0046	-4.5
3	ECOLIOP5024HA.3386.3386.2	2	10.93	4280		(K)IGGIGTVPVGR(V)	(K)I G|G|I|G/T/V/P V G R(V)	1025.61	-0.004	-3.9
4	ECOLIOP5024HB.3163.3163.2	2	10.35	1080		(R)QTVAVGVIK(S)	(R)Q T/V/A|V/G V\I K(S)	914.567	0.0012	1.3
5	ECOLIOP5024HA.3378.3378.2	2	7.16	4280		(K)IGGIGTVPVGR(V)	(K)I/G|G I/G T V/P V G R(V)	1025.61	-0.004	-3.9
6	ECOLIOP5024HB.3368.3368.2	2	6.86	5510		(K)IGGIGTVPVGR(V)	(K)I G/G\I|G/T/V/P V G R(V)	1025.61	-0.0046	-4.5
7	ECOLIOP5024HA.3363.3363.2	2	6.84	4280		(K)IGGIGTVPVGR(V)	(K)I/G|G\I|G/T V/P V/G R(V)	1025.61	-0.004	-3.9
Group	Subgroup	Spectra	Distinct	Distinct	% AA	Total	Protein MW	Protein	Species	Database	Protein Name
(#)	(#)	(#)	Peptides	Summed	Coverage	Protein	(Da)	pI		Accession #
			(#)	MS/MS Search		Spectral
				Score		Intensity
3	3.1	4	1	16.18	1.2	1690000	53610.1	6.17	CAEEL	Q09400
#	Filename	z	Score	Spectrum	Variable	Sequence	Sequence Map	MH+	MH+	MH+
				Intensity	Sites			Matched	Mass Shift	Error
								(Da)	(Da)	(ppm)
1	ECOLIOP5024HB.2448.2499.2	2	16.18	427000		(K)SGLLNR(F)	(K)S/G|L|L N/R(F)	659.384	-0.0011	-1.7
2	ECOLIOP5024HA.2453.2513.2	2	13.85	413000		(K)SGLLNR(F)	(K)S/G|L|L N/R(F)	659.384	-0.0011	-1.6
3	ECOLIOP5024HC.2446.2515.2	2	12.87	418000		(K)SGLLNR(F)	(K)S/G|L|L N/R(F)	659.384	-0.0008	-1.3
4	ECOLIOP5024HB.2506.2515.2	2	10.16	427000		(K)SGLLNR(F)	(K)S/G|L|L N/R(F)	659.384	-0.0038	-5.8
Group	Subgroup	Spectra	Distinct	Distinct	% AA	Total	Protein MW	Protein	Species	Database	Protein Name
(#)	(#)	(#)	Peptides	Summed	Coverage	Protein	(Da)	pI		Accession #
			(#)	MS/MS Search		Spectral
				Score		Intensity
4	4.1	3	1	14.97	5.4	270000	40860	5.86	CAEEL	Q17930
#	Filename	z	Score	Spectrum	Variable	Sequence	Sequence Map	MH+	MH+	MH+
				Intensity	Sites			Matched	Mass Shift	Error
								(Da)	(Da)	(ppm)
1	ECOLIOP5024HC.4247.4308.3	3	14.97	91300		(K)CSSLHDEMISKQCQPVLLK(L)	(K)C S S L H D E M|I|S K/Q C Q P V/L/L/K(L)	2273.11	0.0447	19.7
2	ECOLIOP5024HB.4251.4312.3	3	12.32	89300		(K)CSSLHDEMISKQCQPVLLK(L)	(K)C S S L H D E M\I|S K Q C Q P V/L/L/K(L)	2273.11	0.0437	19.2
3	ECOLIOP5024HA.4340.4340.3	3	6.93	89300		(K)CSSLHDEMISKQCQPVLLK(L)	(K)C S S L H D E M\I\S K/Q C Q P V/L/L/K(L)	2273.11	0.0454	20
Group	Subgroup	Spectra	Distinct	Distinct	% AA	Total	Protein MW	Protein	Species	Database	Protein Name
(#)	(#)	(#)	Peptides	Summed	Coverage	Protein	(Da)	pI		Accession #
			(#)	MS/MS Search		Spectral
				Score		Intensity
5	5.1	2	1	14	0.1	45300	461741	5.2	CAEEL	H2L075
#	Filename	z	Score	Spectrum	Variable	Sequence	Sequence Map	MH+	MH+	MH+
				Intensity	Sites			Matched	Mass Shift	Error
								(Da)	(Da)	(ppm)
1	ECOLIOP5024HB.3394.3411.2	2	14	24700		(R)VSWLK(D)	(R)V/S|W/L/K(D)	632.377	-0.0028	-4.5
2	ECOLIOP5024HA.3410.3420.2	2	9.16	20600		(R)VSWLK(D)	(R)V/S|W/L/K(D)	632.377	-0.0024	-3.8
Group	Subgroup	Spectra	Distinct	Distinct	% AA	Total	Protein MW	Protein	Species	Database	Protein Name
(#)	(#)	(#)	Peptides	Summed	Coverage	Protein	(Da)	pI		Accession #
			(#)	MS/MS Search		Spectral
				Score		Intensity
6	6.1	5	1	13.45	1.8	93100	38009.2	8.8	CAEEL	V6CLB7
#	Filename	z	Score	Spectrum	Variable	Sequence	Sequence Map	MH+	MH+	MH+
				Intensity	Sites			Matched	Mass Shift	Error
								(Da)	(Da)	(ppm)
1	ECOLIOP5024HA.2605.2616.2	2	13.45	20400		(K)GYLENK(T)	(K)G/Y|L/E/N/K(T)	723.367	0.0009	1.2
2	ECOLIOP5024HC.2593.2605.2	2	11.43	16500		(K)GYLENK(T)	(K)G/Y|L|E/N/K(T)	723.367	-0.0034	-4.7
3	ECOLIOP5024HC.2640.2640.2	2	8.75	16500		(K)GYLENK(T)	(K)G/Y|L/E N|K(T)	723.367	-0.0034	-4.7
4	ECOLIOP5024HB.2630.2630.2	2	5.19	23000		(K)GYLENK(T)	(K)G Y|L/E/N K(T)	723.367	-0.0031	-4.4
5	ECOLIOP5024HC.2627.2627.2	2	3.13	16500		(K)GYLENK(T)	(K)G Y|L/E/N K(T)	723.367	-0.0034	-4.7
Group	Subgroup	Spectra	Distinct	Distinct	% AA	Total	Protein MW	Protein	Species	Database	Protein Name
(#)	(#)	(#)	Peptides	Summed	Coverage	Protein	(Da)	pI		Accession #
			(#)	MS/MS Search		Spectral
				Score		Intensity
7	7.1	2	1	12.95	4.2	19800	45367.3	8.38	CAEEL	Q22401
#	Filename	z	Score	Spectrum	Variable	Sequence	Sequence Map	MH+	MH+	MH+
				Intensity	Sites			Matched	Mass Shift	Error
								(Da)	(Da)	(ppm)
1	ECOLIOP5024HC.4466.4466.2	2	12.95	9090	M82m	(R)AmEKISNHTCIKFSPK(D)	(R)A m/E K I/S/N H T/C I K/F\S P K(D)	1890.96	15.9612	-17.7
2	ECOLIOP5024HA.4469.4469.2	2	5.9	10700	M82m	(R)AmEKISNHTCIKFSPK(D)	(R)A m\E/K I S N/H T C I K F\S P K(D)	1890.96	15.9607	-17.9
Group	Subgroup	Spectra	Distinct	Distinct	% AA	Total	Protein MW	Protein	Species	Database	Protein Name
(#)	(#)	(#)	Peptides	Summed	Coverage	Protein	(Da)	pI		Accession #
			(#)	MS/MS Search		Spectral
				Score		Intensity
8	8.1	6	1	12.83	1	697000	63688.4	5.62	CAEEL	Q9N4P3
#	Filename	z	Score	Spectrum	Variable	Sequence	Sequence Map	MH+	MH+	MH+
				Intensity	Sites			Matched	Mass Shift	Error
								(Da)	(Da)	(ppm)
1	ECOLIOP5024HA.2549.2559.2	2	12.83	119000		(R)SGIDLR(N)	(R)S/G|I|D L/R(N)	660.367	-0.003	-4.5
2	ECOLIOP5024HB.2544.2578.2	2	11.63	119000		(R)SGIDLR(N)	(R)S/G|I|D L/R(N)	660.367	-0.0035	-5.3
3	ECOLIOP5024HC.2540.2580.2	2	9.75	113000		(R)SGIDLR(N)	(R)S/G|I|D L/R(N)	660.367	-0.0015	-2.3
4	ECOLIOP5024HC.2543.2543.2	2	9.74	113000		(R)SGIDLR(N)	(R)S/G|I|D L/R(N)	660.367	-0.0006	-0.8
5	ECOLIOP5024HA.2583.2583.2	2	6.47	119000		(R)SGIDLR(N)	(R)S/G|I/D L/R(N)	660.367	-0.0002	-0.3
6	ECOLIOP5024HC.2576.2576.2	2	3.54	113000		(R)SGIDLR(N)	(R)S/G|I|D L R(N)	660.367	-0.0006	-0.8
Group	Subgroup	Spectra	Distinct	Distinct	% AA	Total	Protein MW	Protein	Species	Database	Protein Name
(#)	(#)	(#)	Peptides	Summed	Coverage	Protein	(Da)	pI		Accession #
			(#)	MS/MS Search		Spectral
				Score		Intensity
9	9.1	1	1	12.76	0.9	69000	109608	4.37	CAEEL	Q09560
#	Filename	z	Score	Spectrum	Variable	Sequence	Sequence Map	MH+	MH+	MH+
				Intensity	Sites			Matched	Mass Shift	Error
								(Da)	(Da)	(ppm)
1	ECOLIOP5024HA.2317.2317.3	3	12.76	69000		(R)EELDAITKK(L)	(R)E/E L D/A|I|T K K(L)	1046.57	0.0188	18
Group	Subgroup	Spectra	Distinct	Distinct	% AA	Total	Protein MW	Protein	Species	Database	Protein Name
(#)	(#)	(#)	Peptides	Summed	Coverage	Protein	(Da)	pI		Accession #
			(#)	MS/MS Search		Spectral
				Score		Intensity
10	10.1	3	1	12.7	3.2	183000	31791.1	9.38	CAEEL	G5EFI9
#	Filename	z	Score	Spectrum	Variable	Sequence	Sequence Map	MH+	MH+	MH+
				Intensity	Sites			Matched	Mass Shift	Error
								(Da)	(Da)	(ppm)
1	ECOLIOP5024HA.2320.2320.3	3	12.7	69000		(R)AKMNIISNR(M)	(R)A/K M/N I\I/S/N/R(M)	1046.58	0.0141	13.5
2	ECOLIOP5024HC.2308.2308.3	3	12.25	57100		(R)AKMNIISNR(M)	(R)A K M/N/I|I/S/N R(M)	1046.58	0.0151	14.5
3	ECOLIOP5024HB.2309.2309.3	3	5.45	56500		(R)AKMNIISNR(M)	(R)A/K M/N I\I/S N R(M)	1046.58	0.015	14.4
Group	Subgroup	Spectra	Distinct	Distinct	% AA	Total	Protein MW	Protein	Species	Database	Protein Name
(#)	(#)	(#)	Peptides	Summed	Coverage	Protein	(Da)	pI		Accession #
			(#)	MS/MS Search		Spectral
				Score		Intensity
11	11.1	4	1	12.09	2.7	277000	74997.9	8.26	CAEEL	O62139
#	Filename	z	Score	Spectrum	Variable	Sequence	Sequence Map	MH+	MH+	MH+
				Intensity	Sites			Matched	Mass Shift	Error
								(Da)	(Da)	(ppm)
1	ECOLIOP5024HB.4014.4014.3	3	12.09	75400	M65m	(K)IPELADTQPFPFmDRLEK(I)	(K)I P/E L/A D T Q P F P|F m D R L E/K(I)	2147.08	15.965	-13.8
2	ECOLIOP5024HA.3987.4023.3	3	11.82	64200	M65m	(K)IPELADTQPFPFmDRLEK(I)	(K)I P/E L/A D T Q P F P|F m D R L E/K(I)	2147.08	15.9642	-14.2
3	ECOLIOP5024HB.3968.3997.3	3	7.86	75400	M65m	(K)IPELADTQPFPFmDRLEK(I)	(K)I P/E L/A D T Q P F P|F m D R L E K(I)	2147.08	15.965	-13.8
4	ECOLIOP5024HC.3974.3986.2	2	4.61	61700	M65m	(K)IPELADTQPFPFmDRLEK(I)	(K)I P E L/A D T Q P F P|F m D R L E/K(I)	2147.08	15.9654	-13.6
Group	Subgroup	Spectra	Distinct	Distinct	% AA	Total	Protein MW	Protein	Species	Database	Protein Name
(#)	(#)	(#)	Peptides	Summed	Coverage	Protein	(Da)	pI		Accession #
			(#)	MS/MS Search		Spectral
				Score		Intensity
12	12.1	1	1	11.36	1.6	18800	67827.4	7.75	CAEEL	O18256
#	Filename	z	Score	Spectrum	Variable	Sequence	Sequence Map	MH+	MH+	MH+
				Intensity	Sites			Matched	Mass Shift	Error
								(Da)	(Da)	(ppm)
1	ECOLIOP5024HC.8452.8452.2	2	11.36	18800		(K)HTEHVVVVPK(S)	(K)H T E H V/V/V V P K(S)	1144.65	0.0012	1.1
Group	Subgroup	Spectra	Distinct	Distinct	% AA	Total	Protein MW	Protein	Species	Database	Protein Name
(#)	(#)	(#)	Peptides	Summed	Coverage	Protein	(Da)	pI		Accession #
			(#)	MS/MS Search		Spectral
				Score		Intensity
13	13.1	1	1	11	3.5	112000	69278	7.22	CAEEL	Q22802
#	Filename	z	Score	Spectrum	Variable	Sequence	Sequence Map	MH+	MH+	MH+
				Intensity	Sites			Matched	Mass Shift	Error
								(Da)	(Da)	(ppm)
1	ECOLIOP5024HA.3537.3546.4	4	11	112000	M67m	(K)NVSGYAKSGELLALmGASGAGK(T)	(K)N V S G Y A\K S G/E/L L A L m/G A/S G A G/K(T)	2081.07	16.0321	17.8
Group	Subgroup	Spectra	Distinct	Distinct	% AA	Total	Protein MW	Protein	Species	Database	Protein Name
(#)	(#)	(#)	Peptides	Summed	Coverage	Protein	(Da)	pI		Accession #
			(#)	MS/MS Search		Spectral
				Score		Intensity
14	14.1	2	2	10.33	10.4	82300	22398.9	4.75	CAEEL	Q21392
#	Filename	z	Score	Spectrum	Variable	Sequence	Sequence Map	MH+	MH+	MH+
				Intensity	Sites			Matched	Mass Shift	Error
								(Da)	(Da)	(ppm)
1	ECOLIOP5024HC.4690.4690.3	3	5.81	13900	M126m	(K)RTDGSFYLEANEDFLmIVAKSK(A)	(K)R T D G S F Y/L E\A\N\E D\F/L m I V A/K S K(A)	2534.26	15.9689	-10.2
2	ECOLIOP5024HB.3969.3969.2	2	4.52	68400		(R)TDGSFYLEANEDFLMIVAK(S)	(R)T D G S F Y L E/A N E/D/F L M I V A K(S)	2163.03	0.0186	8.6
Group	Subgroup	Spectra	Distinct	Distinct	% AA	Total	Protein MW	Protein	Species	Database	Protein Name
(#)	(#)	(#)	Peptides	Summed	Coverage	Protein	(Da)	pI		Accession #
			(#)	MS/MS Search		Spectral
				Score		Intensity
15	15.1	3	1	10.29	1	929000	55271.1	8.69	CAEEL	H2KZ09
#	Filename	z	Score	Spectrum	Variable	Sequence	Sequence Map	MH+	MH+	MH+
				Intensity	Sites			Matched	Mass Shift	Error
								(Da)	(Da)	(ppm)
1	ECOLIOP5024HA.2425.2425.2	2	10.29	310000		(R)SLYEK(L)	(R)S/L|Y/E K(L)	639.335	0.0095	14.8
2	ECOLIOP5024HA.2353.2402.2	2	9.13	310000		(R)SLYEK(L)	(R)S/L|Y E K(L)	639.335	0.0092	14.5
3	ECOLIOP5024HB.2348.2405.2	2	7.67	309000		(R)SLYEK(L)	(R)S/L|Y/E K(L)	639.335	0.0101	15.7
Group	Subgroup	Spectra	Distinct	Distinct	% AA	Total	Protein MW	Protein	Species	Database	Protein Name
(#)	(#)	(#)	Peptides	Summed	Coverage	Protein	(Da)	pI		Accession #
			(#)	MS/MS Search		Spectral
				Score		Intensity
16	16.1	2	1	10.23	2.2	25600	35646.7	9.43	CAEEL	Q7YXD2
#	Filename	z	Score	Spectrum	Variable	Sequence	Sequence Map	MH+	MH+	MH+
				Intensity	Sites			Matched	Mass Shift	Error
								(Da)	(Da)	(ppm)
1	ECOLIOP5024HA.3801.3837.2	2	10.23	12700	M101m	(K)mSIVPPK(A)	(K)m S|I/V/P P K(A)	771.443	16.0094	18.4
2	ECOLIOP5024HC.3823.3823.2	2	7.44	12900	M101m	(K)mSIVPPK(A)	(K)m S/I/V/P P K(A)	771.443	16.01	19.1
Group	Subgroup	Spectra	Distinct	Distinct	% AA	Total	Protein MW	Protein	Species	Database	Protein Name
(#)	(#)	(#)	Peptides	Summed	Coverage	Protein	(Da)	pI		Accession #
			(#)	MS/MS Search		Spectral
				Score		Intensity
17	17.1	1	1	10.1	4.6	71800	46529.3	8.77	CAEEL	Q19683
#	Filename	z	Score	Spectrum	Variable	Sequence	Sequence Map	MH+	MH+	MH+
				Intensity	Sites			Matched	Mass Shift	Error
								(Da)	(Da)	(ppm)
1	ECOLIOP5024HC.3965.4006.3	3	10.1	71800		(R)FFAANVGVKFQTPEEFFGK(S)	(R)F F A A N V/G V K F Q|T\P/E E F\F G/K(S)	2163.09	-0.0389	-18
Group	Subgroup	Spectra	Distinct	Distinct	% AA	Total	Protein MW	Protein	Species	Database	Protein Name
(#)	(#)	(#)	Peptides	Summed	Coverage	Protein	(Da)	pI		Accession #
			(#)	MS/MS Search		Spectral
				Score		Intensity
18	18.1	1	1	9.98	2.8	65300	29126.7	6.24	CAEEL	Q19812
#	Filename	z	Score	Spectrum	Variable	Sequence	Sequence Map	MH+	MH+	MH+
				Intensity	Sites			Matched	Mass Shift	Error
								(Da)	(Da)	(ppm)
1	ECOLIOP5024HC.1929.1991.2	2	9.98	65300		(K)IEKPEYK(K)	(K)I/E|K P E Y/K(K)	906.493	0.0086	9.5
Group	Subgroup	Spectra	Distinct	Distinct	% AA	Total	Protein MW	Protein	Species	Database	Protein Name
(#)	(#)	(#)	Peptides	Summed	Coverage	Protein	(Da)	pI		Accession #
			(#)	MS/MS Search		Spectral
				Score		Intensity
19	19.1	1	1	9.91	2.6	2720	80278.2	8.64	CAEEL	Q21153
#	Filename	z	Score	Spectrum	Variable	Sequence	Sequence Map	MH+	MH+	MH+
				Intensity	Sites			Matched	Mass Shift	Error
								(Da)	(Da)	(ppm)
1	ECOLIOP5024HB.3990.3990.4	4	9.91	2720	M420m	(R)TSGSFVGEVmYKNSLDCFK(K)	(R)T\S G S F V G/E/V m/Y K\N S L D C F K(K)	2169	16.0179	10.5
Group	Subgroup	Spectra	Distinct	Distinct	% AA	Total	Protein MW	Protein	Species	Database	Protein Name
(#)	(#)	(#)	Peptides	Summed	Coverage	Protein	(Da)	pI		Accession #
			(#)	MS/MS Search		Spectral
				Score		Intensity
20	20.1	3	1	9.74	1.6	55200	43108.5	6.16	CAEEL	H2L0L6
#	Filename	z	Score	Spectrum	Variable	Sequence	Sequence Map	MH+	MH+	MH+
				Intensity	Sites			Matched	Mass Shift	Error
								(Da)	(Da)	(ppm)
1	ECOLIOP5024HB.2365.2373.2	2	9.74	24900		(K)GENQSK(C)	(K)G/E\N|Q S/K(C)	662.31	0.0122	18.4
2	ECOLIOP5024HC.2365.2371.2	2	9.59	16600		(K)GENQSK(C)	(K)G/E\N/Q S/K(C)	662.31	0.0127	19.2
3	ECOLIOP5024HA.2373.2379.2	2	8.41	13700		(K)GENQSK(C)	(K)G/E\N/Q S/K(C)	662.31	0.0026	3.9
Group	Subgroup	Spectra	Distinct	Distinct	% AA	Total	Protein MW	Protein	Species	Database	Protein Name
(#)	(#)	(#)	Peptides	Summed	Coverage	Protein	(Da)	pI		Accession #
			(#)	MS/MS Search		Spectral
				Score		Intensity
21	21.1	1	1	9.73	5.5	45200	31152.8	9.58	CAEEL	Q18611
#	Filename	z	Score	Spectrum	Variable	Sequence	Sequence Map	MH+	MH+	MH+
				Intensity	Sites			Matched	Mass Shift	Error
								(Da)	(Da)	(ppm)
1	ECOLIOP5024HB.4377.4377.2	2	9.73	45200		(R)CIGGQIFASCLVSLK(F)	(R)C I G G/Q I F A S C L V/S/L/K(F)	1652.85	-0.024	-14.5
Group	Subgroup	Spectra	Distinct	Distinct	% AA	Total	Protein MW	Protein	Species	Database	Protein Name
(#)	(#)	(#)	Peptides	Summed	Coverage	Protein	(Da)	pI		Accession #
			(#)	MS/MS Search		Spectral
				Score		Intensity
22	22.1	2	1	9.71	2.2	230000	39478.2	6.48	CAEEL	G5EGG8
#	Filename	z	Score	Spectrum	Variable	Sequence	Sequence Map	MH+	MH+	MH+
				Intensity	Sites			Matched	Mass Shift	Error
								(Da)	(Da)	(ppm)
1	ECOLIOP5024HA.2112.2112.2	2	9.71	116000		(R)TGSASLDR(L)	(R)T|G|S\A/S L D R(L)	806.4	-0.0018	-2.3
2	ECOLIOP5024HC.2110.2110.2	2	7.06	114000		(R)TGSASLDR(L)	(R)T\G|S A/S L D R(L)	806.4	-0.0027	-3.3
Group	Subgroup	Spectra	Distinct	Distinct	% AA	Total	Protein MW	Protein	Species	Database	Protein Name
(#)	(#)	(#)	Peptides	Summed	Coverage	Protein	(Da)	pI		Accession #
			(#)	MS/MS Search		Spectral
				Score		Intensity
23	23.1	1	1	9.21	2	5790	69685.1	6.48	CAEEL	H2L034
#	Filename	z	Score	Spectrum	Variable	Sequence	Sequence Map	MH+	MH+	MH+
				Intensity	Sites			Matched	Mass Shift	Error
								(Da)	(Da)	(ppm)
1	ECOLIOP5024HA.4154.4154.2	2	9.21	5790		(K)TLLITGDSGIGK(T)	(K)T L|L I T G D S/G I G/K(T)	1174.67	-0.0227	-19.3
Group	Subgroup	Spectra	Distinct	Distinct	% AA	Total	Protein MW	Protein	Species	Database	Protein Name
(#)	(#)	(#)	Peptides	Summed	Coverage	Protein	(Da)	pI		Accession #
			(#)	MS/MS Search		Spectral
				Score		Intensity
24	24.1	1	1	9.17	1.2	56500	97143.2	9.05	CAEEL	A0A1X7RBL4
#	Filename	z	Score	Spectrum	Variable	Sequence	Sequence Map	MH+	MH+	MH+
				Intensity	Sites			Matched	Mass Shift	Error
								(Da)	(Da)	(ppm)
1	ECOLIOP5024HB.2313.2313.3	3	9.17	56500		(K)LGIVGTSQSGK(T)	(K)L/G I V/G T S/Q S G\K(T)	1046.58	0.0085	8.1
Group	Subgroup	Spectra	Distinct	Distinct	% AA	Total	Protein MW	Protein	Species	Database	Protein Name
(#)	(#)	(#)	Peptides	Summed	Coverage	Protein	(Da)	pI		Accession #
			(#)	MS/MS Search		Spectral
				Score		Intensity
25	25.1	1	1	9.16	1.9	266000	29261.6	9.19	CAEEL	O62427
#	Filename	z	Score	Spectrum	Variable	Sequence	Sequence Map	MH+	MH+	MH+
				Intensity	Sites			Matched	Mass Shift	Error
								(Da)	(Da)	(ppm)
1	ECOLIOP5024HC.2348.2407.2	2	9.16	266000		(R)SITYR(S)	(R)S/I|T Y/R(S)	639.346	-0.0013	-2.1
Group	Subgroup	Spectra	Distinct	Distinct	% AA	Total	Protein MW	Protein	Species	Database	Protein Name
(#)	(#)	(#)	Peptides	Summed	Coverage	Protein	(Da)	pI		Accession #
			(#)	MS/MS Search		Spectral
				Score		Intensity
26	26.1	1	1	9.06	12.6	116000	17180.2	7.84	CAEEL	P91110
#	Filename	z	Score	Spectrum	Variable	Sequence	Sequence Map	MH+	MH+	MH+
				Intensity	Sites			Matched	Mass Shift	Error
								(Da)	(Da)	(ppm)
1	ECOLIOP5024HB.3527.3527.4	4	9.06	116000		(R)SLTIVGYGIEGGQNYWIVK(G)	(R)S L T I V/G Y G I E G\G Q/N Y/W I V K(G)	2097.1	0.0095	4.6
Group	Subgroup	Spectra	Distinct	Distinct	% AA	Total	Protein MW	Protein	Species	Database	Protein Name
(#)	(#)	(#)	Peptides	Summed	Coverage	Protein	(Da)	pI		Accession #
			(#)	MS/MS Search		Spectral
				Score		Intensity
27	27.1	3	1	9.04	1.5	957000	55695.2	11.42	CAEEL	Q09633
#	Filename	z	Score	Spectrum	Variable	Sequence	Sequence Map	MH+	MH+	MH+
				Intensity	Sites			Matched	Mass Shift	Error
								(Da)	(Da)	(ppm)
1	ECOLIOP5024HC.2113.2178.2	2	9.04	330000		(R)SASTARGR(S)	(R)S/A|S T/A R G R(S)	805.428	-0.0129	-16
2	ECOLIOP5024HA.2115.2159.2	2	8.8	329000		(R)SASTARGR(S)	(R)S/A|S T/A R G R(S)	805.428	-0.0133	-16.5
3	ECOLIOP5024HB.2177.2177.2	2	4.75	298000		(R)SASTARGR(S)	(R)S A|S/T/A R G R(S)	805.428	-0.0136	-16.9
Group	Subgroup	Spectra	Distinct	Distinct	% AA	Total	Protein MW	Protein	Species	Database	Protein Name
(#)	(#)	(#)	Peptides	Summed	Coverage	Protein	(Da)	pI		Accession #
			(#)	MS/MS Search		Spectral
				Score		Intensity
28	28.1	1	1	9	1.9	19600	48273.5	6.91	CAEEL	P34454
#	Filename	z	Score	Spectrum	Variable	Sequence	Sequence Map	MH+	MH+	MH+
				Intensity	Sites			Matched	Mass Shift	Error
								(Da)	(Da)	(ppm)
1	ECOLIOP5024HC.2932.2932.2	2	9	19600		(R)ISEEIGSK(T)	(R)I/S|E E I G S/K(T)	862.452	-0.0123	-14.2
Group	Subgroup	Spectra	Distinct	Distinct	% AA	Total	Protein MW	Protein	Species	Database	Protein Name
(#)	(#)	(#)	Peptides	Summed	Coverage	Protein	(Da)	pI		Accession #
			(#)	MS/MS Search		Spectral
				Score		Intensity
29	29.1	2	1	8.94	1.8	91800	78385	9.23	CAEEL	Q8MNV7
#	Filename	z	Score	Spectrum	Variable	Sequence	Sequence Map	MH+	MH+	MH+
				Intensity	Sites			Matched	Mass Shift	Error
								(Da)	(Da)	(ppm)
1	ECOLIOP5024HB.4321.4353.2	2	8.94	45200		(K)YRTIIFDESHMLK(D)	(K)Y/R T I I/F D/E S H M/L/K(D)	1652.85	-0.021	-12.7
2	ECOLIOP5024HC.4317.4348.2	2	8.71	46700		(K)YRTIIFDESHMLK(D)	(K)Y/R T/I I/F D/E S H M/L/K(D)	1652.85	-0.0214	-13
Group	Subgroup	Spectra	Distinct	Distinct	% AA	Total	Protein MW	Protein	Species	Database	Protein Name
(#)	(#)	(#)	Peptides	Summed	Coverage	Protein	(Da)	pI		Accession #
			(#)	MS/MS Search		Spectral
				Score		Intensity
30	30.1	1	1	8.82	4.8	43700	26738.2	8.71	CAEEL	P90779
#	Filename	z	Score	Spectrum	Variable	Sequence	Sequence Map	MH+	MH+	MH+
				Intensity	Sites			Matched	Mass Shift	Error
								(Da)	(Da)	(ppm)
1	ECOLIOP5024HA.3736.3736.3	3	8.82	43700		(K)LNNSHNGGFFQK(D)	(K)L/N/N S\H|N G G\F F Q\K(D)	1362.65	0.016	11.7
Group	Subgroup	Spectra	Distinct	Distinct	% AA	Total	Protein MW	Protein	Species	Database	Protein Name
(#)	(#)	(#)	Peptides	Summed	Coverage	Protein	(Da)	pI		Accession #
			(#)	MS/MS Search		Spectral
				Score		Intensity
31	31.1	1	1	8.78	3.1	3940	64784.1	9.2	CAEEL	Q9BHL0
#	Filename	z	Score	Spectrum	Variable	Sequence	Sequence Map	MH+	MH+	MH+
				Intensity	Sites			Matched	Mass Shift	Error
								(Da)	(Da)	(ppm)
1	ECOLIOP5024HB.3942.3942.3	3	8.78	3940		(R)CRAHSSQSLGSATKDSAR(A)	(R)C R A H S S Q/S\L\G/S A T K D S A/R(A)	1918.91	-0.0224	-11.7
Group	Subgroup	Spectra	Distinct	Distinct	% AA	Total	Protein MW	Protein	Species	Database	Protein Name
(#)	(#)	(#)	Peptides	Summed	Coverage	Protein	(Da)	pI		Accession #
			(#)	MS/MS Search		Spectral
				Score		Intensity
32	32.1	1	1	8.77	0.5	23300	150936	8.44	CAEEL	G5EDC2
#	Filename	z	Score	Spectrum	Variable	Sequence	Sequence Map	MH+	MH+	MH+
				Intensity	Sites			Matched	Mass Shift	Error
								(Da)	(Da)	(ppm)
1	ECOLIOP5024HB.2934.2934.2	2	8.77	23300		(R)LLEASSDK(S)	(R)L/L E A/S/S D K(S)	862.452	-0.0118	-13.7
Group	Subgroup	Spectra	Distinct	Distinct	% AA	Total	Protein MW	Protein	Species	Database	Protein Name
(#)	(#)	(#)	Peptides	Summed	Coverage	Protein	(Da)	pI		Accession #
			(#)	MS/MS Search		Spectral
				Score		Intensity
33	33.1	1	1	8.68	4.1	42000	40498.1	6.48	CAEEL	P34293
#	Filename	z	Score	Spectrum	Variable	Sequence	Sequence Map	MH+	MH+	MH+
				Intensity	Sites			Matched	Mass Shift	Error
								(Da)	(Da)	(ppm)
1	ECOLIOP5024HC.7247.7247.3	3	8.68	42000		(K)LSRISKAIHVTILK(N)	(K)L S/R I/S K\A/I H V T I/L/K(N)	1579.01	0.0284	18
Group	Subgroup	Spectra	Distinct	Distinct	% AA	Total	Protein MW	Protein	Species	Database	Protein Name
(#)	(#)	(#)	Peptides	Summed	Coverage	Protein	(Da)	pI		Accession #
			(#)	MS/MS Search		Spectral
				Score		Intensity
34	34.1	1	1	8.65	4.3	18300	61967	9.57	CAEEL	Q95Y89
#	Filename	z	Score	Spectrum	Variable	Sequence	Sequence Map	MH+	MH+	MH+
				Intensity	Sites			Matched	Mass Shift	Error
								(Da)	(Da)	(ppm)
1	ECOLIOP5024HB.4688.4688.3	3	8.65	18300	M429m	(R)SmGKDVSDLEAAIPKTMDELPMR(R)	(R)S m G K D V S D\L E A A I P/K\T M D E/L P\M R(R)	2534.23	15.9892	-2.2
Group	Subgroup	Spectra	Distinct	Distinct	% AA	Total	Protein MW	Protein	Species	Database	Protein Name
(#)	(#)	(#)	Peptides	Summed	Coverage	Protein	(Da)	pI		Accession #
			(#)	MS/MS Search		Spectral
				Score		Intensity
35	35.1	1	1	8.62	0.6	19800	164186	5.9	CAEEL	P90757
#	Filename	z	Score	Spectrum	Variable	Sequence	Sequence Map	MH+	MH+	MH+
				Intensity	Sites			Matched	Mass Shift	Error
								(Da)	(Da)	(ppm)
1	ECOLIOP5024HA.2321.2321.2	2	8.62	19800		(K)LQSVLEVMK(N)	(K)L/Q|S/V L E V/M K(N)	1046.59	-0.0016	-1.5
Group	Subgroup	Spectra	Distinct	Distinct	% AA	Total	Protein MW	Protein	Species	Database	Protein Name
(#)	(#)	(#)	Peptides	Summed	Coverage	Protein	(Da)	pI		Accession #
			(#)	MS/MS Search		Spectral
				Score		Intensity
36	36.1	1	1	8.55	2.5	93100	36146.5	8.94	CAEEL	G8JYA7
#	Filename	z	Score	Spectrum	Variable	Sequence	Sequence Map	MH+	MH+	MH+
				Intensity	Sites			Matched	Mass Shift	Error
								(Da)	(Da)	(ppm)
1	ECOLIOP5024HC.8513.8513.2	2	8.55	93100		(R)IGPTKKIK(M)	(R)I G P T K/K I/K(M)	884.593	-0.0008	-1
Group	Subgroup	Spectra	Distinct	Distinct	% AA	Total	Protein MW	Protein	Species	Database	Protein Name
(#)	(#)	(#)	Peptides	Summed	Coverage	Protein	(Da)	pI		Accession #
			(#)	MS/MS Search		Spectral
				Score		Intensity
37	37.1	1	1	8.28	1.2	19400	120964	5.11	CAEEL	G5ECQ3
#	Filename	z	Score	Spectrum	Variable	Sequence	Sequence Map	MH+	MH+	MH+
				Intensity	Sites			Matched	Mass Shift	Error
								(Da)	(Da)	(ppm)
1	ECOLIOP5024HC.4352.4352.3	3	8.28	19400		(K)YEIDEKEEIQTKK(D)	(K)Y E I D E K E/E/I/Q/T K/K(D)	1652.84	-0.0094	-5.7
Group	Subgroup	Spectra	Distinct	Distinct	% AA	Total	Protein MW	Protein	Species	Database	Protein Name
(#)	(#)	(#)	Peptides	Summed	Coverage	Protein	(Da)	pI		Accession #
			(#)	MS/MS Search		Spectral
				Score		Intensity
38	38.1	2	2	8.21	1.8	30100	164552	6.25	CAEEL	A0A1I6CMB8
#	Filename	z	Score	Spectrum	Variable	Sequence	Sequence Map	MH+	MH+	MH+
				Intensity	Sites			Matched	Mass Shift	Error
								(Da)	(Da)	(ppm)
1	ECOLIOP5024HA.5116.5116.2	2	4.21	24400		(K)SSDDLDNFNSTKIEPDKPK(T)	(K)S/S D D L D N F N/S T K I E P D K P K(T)	2150.03	-0.0108	-5
2	ECOLIOP5024HA.3261.3261.2	2	4	5730		(R)SCPAITPK(Q)	(R)S C P A/I/T P K(Q)	873.45	0.0091	10.4
Group	Subgroup	Spectra	Distinct	Distinct	% AA	Total	Protein MW	Protein	Species	Database	Protein Name
(#)	(#)	(#)	Peptides	Summed	Coverage	Protein	(Da)	pI		Accession #
			(#)	MS/MS Search		Spectral
				Score		Intensity
39	39.1	2	1	7.88	1	18300	93205.6	5.39	CAEEL	O45373
#	Filename	z	Score	Spectrum	Variable	Sequence	Sequence Map	MH+	MH+	MH+
				Intensity	Sites			Matched	Mass Shift	Error
								(Da)	(Da)	(ppm)
1	ECOLIOP5024HA.3734.3734.2	2	7.88	11500		(R)IDLEETLK(L)	(R)I D|L/E/E T/L/K(L)	960.525	-0.0122	-12.7
2	ECOLIOP5024HB.3732.3732.2	2	3.06	6820		(R)IDLEETLK(L)	(R)I D|L/E/E T/L/K(L)	960.525	-0.0104	-10.8
Group	Subgroup	Spectra	Distinct	Distinct	% AA	Total	Protein MW	Protein	Species	Database	Protein Name
(#)	(#)	(#)	Peptides	Summed	Coverage	Protein	(Da)	pI		Accession #
			(#)	MS/MS Search		Spectral
				Score		Intensity
40	40.1	1	1	7.87	2.1	8150	33460.4	10.05	CAEEL	Q5CZ33
#	Filename	z	Score	Spectrum	Variable	Sequence	Sequence Map	MH+	MH+	MH+
				Intensity	Sites			Matched	Mass Shift	Error
								(Da)	(Da)	(ppm)
1	ECOLIOP5024HB.2201.2201.2	2	7.87	8150		(K)YISGNL(-)	(K)Y/I|S G N L(-)	666.346	-0.002	-3
Group	Subgroup	Spectra	Distinct	Distinct	% AA	Total	Protein MW	Protein	Species	Database	Protein Name
(#)	(#)	(#)	Peptides	Summed	Coverage	Protein	(Da)	pI		Accession #
			(#)	MS/MS Search		Spectral
				Score		Intensity
41	41.1	1	1	7.85	1.2	2700	63013.4	4.16	CAEEL	O17687
#	Filename	z	Score	Spectrum	Variable	Sequence	Sequence Map	MH+	MH+	MH+
				Intensity	Sites			Matched	Mass Shift	Error
								(Da)	(Da)	(ppm)
1	ECOLIOP5024HA.3052.3052.2	2	7.85	2700		(K)ALLEVGK(L)	(K)A/L|L/E V/G K(L)	729.451	-0.0037	-5.1
Group	Subgroup	Spectra	Distinct	Distinct	% AA	Total	Protein MW	Protein	Species	Database	Protein Name
(#)	(#)	(#)	Peptides	Summed	Coverage	Protein	(Da)	pI		Accession #
			(#)	MS/MS Search		Spectral
				Score		Intensity
42	42.1	1	1	7.81	3.4	710	23107.8	10.93	CAEEL	Q27389
#	Filename	z	Score	Spectrum	Variable	Sequence	Sequence Map	MH+	MH+	MH+
				Intensity	Sites			Matched	Mass Shift	Error
								(Da)	(Da)	(ppm)
1	ECOLIOP5024HB.3042.3042.2	2	7.81	710		(R)AIIIDGK(N)	(R)A I|I I/D/G/K(N)	729.451	-0.0019	-2.6
Group	Subgroup	Spectra	Distinct	Distinct	% AA	Total	Protein MW	Protein	Species	Database	Protein Name
(#)	(#)	(#)	Peptides	Summed	Coverage	Protein	(Da)	pI		Accession #
			(#)	MS/MS Search		Spectral
				Score		Intensity
43	43.1	1	1	7.79	9.6	1480	21464.7	9.74	CAEEL	Q21092
#	Filename	z	Score	Spectrum	Variable	Sequence	Sequence Map	MH+	MH+	MH+
				Intensity	Sites			Matched	Mass Shift	Error
								(Da)	(Da)	(ppm)
1	ECOLIOP5024HC.5240.5240.3	3	7.79	1480		(K)DGKGGGGGGGGGDGGSGTGNGK(F)	(K)D G K G\G\G G|G G G G\G D G G/S G T/G/N G K(F)	1662.71	0.0273	16.4
Group	Subgroup	Spectra	Distinct	Distinct	% AA	Total	Protein MW	Protein	Species	Database	Protein Name
(#)	(#)	(#)	Peptides	Summed	Coverage	Protein	(Da)	pI		Accession #
			(#)	MS/MS Search		Spectral
				Score		Intensity
44	44.1	1	1	7.68	1.7	46400	85072.4	8.52	CAEEL	G5EEA7
#	Filename	z	Score	Spectrum	Variable	Sequence	Sequence Map	MH+	MH+	MH+
				Intensity	Sites			Matched	Mass Shift	Error
								(Da)	(Da)	(ppm)
1	ECOLIOP5024HA.4332.4373.2	2	7.68	46400		(R)RFYEPFTSFFALK(L)	(R)R F/Y E P|F T S F F A/L/K(L)	1652.85	-0.0227	-13.7
Group	Subgroup	Spectra	Distinct	Distinct	% AA	Total	Protein MW	Protein	Species	Database	Protein Name
(#)	(#)	(#)	Peptides	Summed	Coverage	Protein	(Da)	pI		Accession #
			(#)	MS/MS Search		Spectral
				Score		Intensity
45	45.1	2	1	7.39	1.6	825000	40893.3	8.99	CAEEL	O44150
#	Filename	z	Score	Spectrum	Variable	Sequence	Sequence Map	MH+	MH+	MH+
				Intensity	Sites			Matched	Mass Shift	Error
								(Da)	(Da)	(ppm)
1	ECOLIOP5024HA.2541.2541.2	2	7.39	413000		(R)RGIGEK(D)	(R)R/G/I/G\E K(D)	659.384	-0.002	-3
2	ECOLIOP5024HA.2545.2545.2	2	5.48	413000		(R)RGIGEK(D)	(R)R/G/I/G E/K(D)	659.384	-0.002	-3
Group	Subgroup	Spectra	Distinct	Distinct	% AA	Total	Protein MW	Protein	Species	Database	Protein Name
(#)	(#)	(#)	Peptides	Summed	Coverage	Protein	(Da)	pI		Accession #
			(#)	MS/MS Search		Spectral
				Score		Intensity
46	46.1	1	1	7.35	5.7	17700	19628	5.38	CAEEL	A0A0K3ARH7
#	Filename	z	Score	Spectrum	Variable	Sequence	Sequence Map	MH+	MH+	MH+
				Intensity	Sites			Matched	Mass Shift	Error
								(Da)	(Da)	(ppm)
1	ECOLIOP5024HC.2313.2313.2	2	7.35	17700		(K)KLQDALSGSK(F)	(K)K\L|Q D|A L S/G S K(F)	1046.58	0.0084	8
Group	Subgroup	Spectra	Distinct	Distinct	% AA	Total	Protein MW	Protein	Species	Database	Protein Name
(#)	(#)	(#)	Peptides	Summed	Coverage	Protein	(Da)	pI		Accession #
			(#)	MS/MS Search		Spectral
				Score		Intensity
47	47.1	1	1	7.28	11.4	15500	15255.2	7.03	CAEEL	Q9TXQ6
#	Filename	z	Score	Spectrum	Variable	Sequence	Sequence Map	MH+	MH+	MH+
				Intensity	Sites			Matched	Mass Shift	Error
								(Da)	(Da)	(ppm)
1	ECOLIOP5024HB.3867.3867.3	3	7.28	15500	M63m	(K)DEVmGSMDTLSSLAK(V)	(K)D E V m/G/S M/D T L S/S L A/K(V)	1583.73	15.9975	1.6
Group	Subgroup	Spectra	Distinct	Distinct	% AA	Total	Protein MW	Protein	Species	Database	Protein Name
(#)	(#)	(#)	Peptides	Summed	Coverage	Protein	(Da)	pI		Accession #
			(#)	MS/MS Search		Spectral
				Score		Intensity
48	48.1	1	1	7.25	12	5980	14446.1	9.1	CAEEL	Q94045
#	Filename	z	Score	Spectrum	Variable	Sequence	Sequence Map	MH+	MH+	MH+
				Intensity	Sites			Matched	Mass Shift	Error
								(Da)	(Da)	(ppm)
1	ECOLIOP5024HB.3921.3921.2	2	7.25	5980		(R)EYYIDRDSQKMMPSR(K)	(R)E Y Y/I D R D S/Q K M M P\S R(K)	1918.88	0.0054	2.8
Group	Subgroup	Spectra	Distinct	Distinct	% AA	Total	Protein MW	Protein	Species	Database	Protein Name
(#)	(#)	(#)	Peptides	Summed	Coverage	Protein	(Da)	pI		Accession #
			(#)	MS/MS Search		Spectral
				Score		Intensity
49	49.1	1	1	7.07	3	3550	24665	6.33	CAEEL	Q19660
#	Filename	z	Score	Spectrum	Variable	Sequence	Sequence Map	MH+	MH+	MH+
				Intensity	Sites			Matched	Mass Shift	Error
								(Da)	(Da)	(ppm)
1	ECOLIOP5024HA.3820.3820.2	2	7.07	3550		(K)FDSSVIK(A)	(K)F D|S S/V/I/K(A)	795.425	0.01	12.5
Group	Subgroup	Spectra	Distinct	Distinct	% AA	Total	Protein MW	Protein	Species	Database	Protein Name
(#)	(#)	(#)	Peptides	Summed	Coverage	Protein	(Da)	pI		Accession #
			(#)	MS/MS Search		Spectral
				Score		Intensity
50	50.1	2	1	7.05	3.9	66000	42523.7	10.31	CAEEL	Q7YXB5
#	Filename	z	Score	Spectrum	Variable	Sequence	Sequence Map	MH+	MH+	MH+
				Intensity	Sites			Matched	Mass Shift	Error
								(Da)	(Da)	(ppm)
1	ECOLIOP5024HC.4375.4375.2	2	7.05	46700		(R)TSPRYNLSTCVVQK(S)	(R)T S/P R Y N L S T C V V Q/K(S)	1652.84	-0.0166	-10.1
2	ECOLIOP5024HC.4332.4332.3	3	5.71	19400		(R)TSPRYNLSTCVVQK(S)	(R)T/S/P R\Y/N L S T C V\V Q/K(S)	1652.84	-0.0141	-8.5
Group	Subgroup	Spectra	Distinct	Distinct	% AA	Total	Protein MW	Protein	Species	Database	Protein Name
(#)	(#)	(#)	Peptides	Summed	Coverage	Protein	(Da)	pI		Accession #
			(#)	MS/MS Search		Spectral
				Score		Intensity
51	51.1	3	1	7	6.7	23500	23074.6	9.51	CAEEL	D2YW13
#	Filename	z	Score	Spectrum	Variable	Sequence	Sequence Map	MH+	MH+	MH+
				Intensity	Sites			Matched	Mass Shift	Error
								(Da)	(Da)	(ppm)
1	ECOLIOP5024HC.3852.3852.3	3	7	2660		(R)QITHENADNANPAK(R)	(R)Q I\T H E N\A D\N\A/N P A K(R)	1522.72	-0.008	-5.2
2	ECOLIOP5024HB.3843.3857.2	2	4.39	12000		(R)QITHENADNANPAK(R)	(R)Q\I|T H E N/A\D N A N P A/K(R)	1522.72	-0.0191	-12.5
3	ECOLIOP5024HA.3872.3872.2	2	3.68	8820		(R)QITHENADNANPAK(R)	(R)Q\I|T H E N A\D N A N P A/K(R)	1522.72	-0.0189	-12.4
Group	Subgroup	Spectra	Distinct	Distinct	% AA	Total	Protein MW	Protein	Species	Database	Protein Name
(#)	(#)	(#)	Peptides	Summed	Coverage	Protein	(Da)	pI		Accession #
			(#)	MS/MS Search		Spectral
				Score		Intensity
52	52.1	1	1	6.85	9.4	19800	11421.3	10.29	CAEEL	Q9U374
#	Filename	z	Score	Spectrum	Variable	Sequence	Sequence Map	MH+	MH+	MH+
				Intensity	Sites			Matched	Mass Shift	Error
								(Da)	(Da)	(ppm)
1	ECOLIOP5024HA.2318.2318.2	2	6.85	19800		(R)IKAGSTAKDR(H)	(R)I/K|A G S T|A K D R(H)	1046.6	-0.0055	-5.2
Group	Subgroup	Spectra	Distinct	Distinct	% AA	Total	Protein MW	Protein	Species	Database	Protein Name
(#)	(#)	(#)	Peptides	Summed	Coverage	Protein	(Da)	pI		Accession #
			(#)	MS/MS Search		Spectral
				Score		Intensity
53	53.1	1	1	6.81	6.1	1560	31114.9	5.62	CAEEL	P83351
#	Filename	z	Score	Spectrum	Variable	Sequence	Sequence Map	MH+	MH+	MH+
				Intensity	Sites			Matched	Mass Shift	Error
								(Da)	(Da)	(ppm)
1	ECOLIOP5024HB.4178.4178.4	4	6.81	1560		(R)EIEKTLQESLDSTERSR(R)	(R)E I E K|T L Q E\S/L D S/T E/R S R(R)	2021.02	-0.0098	-4.8
Group	Subgroup	Spectra	Distinct	Distinct	% AA	Total	Protein MW	Protein	Species	Database	Protein Name
(#)	(#)	(#)	Peptides	Summed	Coverage	Protein	(Da)	pI		Accession #
			(#)	MS/MS Search		Spectral
				Score		Intensity
54	54.1	1	1	6.63	1.3	69000	74979.6	7.85	CAEEL	A5Z2V0
#	Filename	z	Score	Spectrum	Variable	Sequence	Sequence Map	MH+	MH+	MH+
				Intensity	Sites			Matched	Mass Shift	Error
								(Da)	(Da)	(ppm)
1	ECOLIOP5024HA.2344.2344.3	3	6.63	69000		(K)QDKVKAVMK(R)	(K)Q|D/K V/K A V M K(R)	1046.6	-0.011	-10.6
Group	Subgroup	Spectra	Distinct	Distinct	% AA	Total	Protein MW	Protein	Species	Database	Protein Name
(#)	(#)	(#)	Peptides	Summed	Coverage	Protein	(Da)	pI		Accession #
			(#)	MS/MS Search		Spectral
				Score		Intensity
55	55.1	1	1	6.62	1.7	2760	51635.7	7.99	CAEEL	A7UQ11
#	Filename	z	Score	Spectrum	Variable	Sequence	Sequence Map	MH+	MH+	MH+
				Intensity	Sites			Matched	Mass Shift	Error
								(Da)	(Da)	(ppm)
1	ECOLIOP5024HC.2309.2309.2	2	6.62	2760		(R)NKYELKPR(I)	(R)N/K/Y E/L|K P/R(I)	1047.6	-0.003	-2.8
Group	Subgroup	Spectra	Distinct	Distinct	% AA	Total	Protein MW	Protein	Species	Database	Protein Name
(#)	(#)	(#)	Peptides	Summed	Coverage	Protein	(Da)	pI		Accession #
			(#)	MS/MS Search		Spectral
				Score		Intensity
56	56.1	1	1	6.61	7.9	57100	12029.7	10.56	CAEEL	Q09558
#	Filename	z	Score	Spectrum	Variable	Sequence	Sequence Map	MH+	MH+	MH+
				Intensity	Sites			Matched	Mass Shift	Error
								(Da)	(Da)	(ppm)
1	ECOLIOP5024HC.2303.2303.3	3	6.61	57100		(R)RSVSQRWK(R)	(R)R S V|S/Q|R W K(R)	1046.59	0.0073	6.9
Group	Subgroup	Spectra	Distinct	Distinct	% AA	Total	Protein MW	Protein	Species	Database	Protein Name
(#)	(#)	(#)	Peptides	Summed	Coverage	Protein	(Da)	pI		Accession #
			(#)	MS/MS Search		Spectral
				Score		Intensity
57	57.1	1	1	6.57	1.6	298000	57477.6	9.61	CAEEL	Q95VX5
#	Filename	z	Score	Spectrum	Variable	Sequence	Sequence Map	MH+	MH+	MH+
				Intensity	Sites			Matched	Mass Shift	Error
								(Da)	(Da)	(ppm)
1	ECOLIOP5024HB.2110.2153.2	2	6.57	298000		(K)ASGAEKDK(K)	(K)A S|G A E K/D K(K)	805.405	0.0091	11.3
Group	Subgroup	Spectra	Distinct	Distinct	% AA	Total	Protein MW	Protein	Species	Database	Protein Name
(#)	(#)	(#)	Peptides	Summed	Coverage	Protein	(Da)	pI		Accession #
			(#)	MS/MS Search		Spectral
				Score		Intensity
58	58.1	1	1	6.56	1.5	2660	92298.3	5.15	CAEEL	Q21854
#	Filename	z	Score	Spectrum	Variable	Sequence	Sequence Map	MH+	MH+	MH+
				Intensity	Sites			Matched	Mass Shift	Error
								(Da)	(Da)	(ppm)
1	ECOLIOP5024HC.3874.3874.3	3	6.56	2660		(R)QANFHNDTFLMGK(V)	(R)Q A N F H/N D T|F L\M G K(V)	1522.71	0.0058	3.8
Group	Subgroup	Spectra	Distinct	Distinct	% AA	Total	Protein MW	Protein	Species	Database	Protein Name
(#)	(#)	(#)	Peptides	Summed	Coverage	Protein	(Da)	pI		Accession #
			(#)	MS/MS Search		Spectral
				Score		Intensity
59	59.1	1	1	6.43	4.1	5900	48992.9	8.75	CAEEL	O16723
#	Filename	z	Score	Spectrum	Variable	Sequence	Sequence Map	MH+	MH+	MH+
				Intensity	Sites			Matched	Mass Shift	Error
								(Da)	(Da)	(ppm)
1	ECOLIOP5024HB.3601.3601.4	4	6.43	5900		(K)KFQTHWVENIEIPTNIK(Q)	(K)K F Q T\H W V/E\N\I E I/P T/N I K(Q)	2097.11	-0.0017	-0.8
Group	Subgroup	Spectra	Distinct	Distinct	% AA	Total	Protein MW	Protein	Species	Database	Protein Name
(#)	(#)	(#)	Peptides	Summed	Coverage	Protein	(Da)	pI		Accession #
			(#)	MS/MS Search		Spectral
				Score		Intensity
60	60.1	1	1	6.42	0.6	69000	182575	8.95	CAEEL	Q9U263
#	Filename	z	Score	Spectrum	Variable	Sequence	Sequence Map	MH+	MH+	MH+
				Intensity	Sites			Matched	Mass Shift	Error
								(Da)	(Da)	(ppm)
1	ECOLIOP5024HA.2312.2312.3	3	6.42	69000		(K)SSATGKTPVAK(R)	(K)S S A/T G/K T P/V A K(R)	1046.58	0.0076	7.2
Group	Subgroup	Spectra	Distinct	Distinct	% AA	Total	Protein MW	Protein	Species	Database	Protein Name
(#)	(#)	(#)	Peptides	Summed	Coverage	Protein	(Da)	pI		Accession #
			(#)	MS/MS Search		Spectral
				Score		Intensity
61	61.1	1	1	6.33	3.3	15200	36104.4	9.18	CAEEL	P90991
#	Filename	z	Score	Spectrum	Variable	Sequence	Sequence Map	MH+	MH+	MH+
				Intensity	Sites			Matched	Mass Shift	Error
								(Da)	(Da)	(ppm)
1	ECOLIOP5024HC.2318.2318.3	3	6.33	15200		(K)LGQIGGDLFK(K)	(K)L G\Q I G/G/D L\F K(K)	1047.58	0.0104	9.9
Group	Subgroup	Spectra	Distinct	Distinct	% AA	Total	Protein MW	Protein	Species	Database	Protein Name
(#)	(#)	(#)	Peptides	Summed	Coverage	Protein	(Da)	pI		Accession #
			(#)	MS/MS Search		Spectral
				Score		Intensity
62	62.1	1	1	6.31	6.3	1620	22346	5.26	CAEEL	A0A2I2LDX7
#	Filename	z	Score	Spectrum	Variable	Sequence	Sequence Map	MH+	MH+	MH+
				Intensity	Sites			Matched	Mass Shift	Error
								(Da)	(Da)	(ppm)
1	ECOLIOP5024HC.3092.3092.4	4	6.31	1620		(K)DLLKLERVAVLK(E)	(K)D L\L/K L E/R/V A V L K(E)	1396.89	0.0268	19.2
Group	Subgroup	Spectra	Distinct	Distinct	% AA	Total	Protein MW	Protein	Species	Database	Protein Name
(#)	(#)	(#)	Peptides	Summed	Coverage	Protein	(Da)	pI		Accession #
			(#)	MS/MS Search		Spectral
				Score		Intensity
63	63.1	1	1	6.31	3.3	103000	48052.4	8.83	CAEEL	Q22710
#	Filename	z	Score	Spectrum	Variable	Sequence	Sequence Map	MH+	MH+	MH+
				Intensity	Sites			Matched	Mass Shift	Error
								(Da)	(Da)	(ppm)
1	ECOLIOP5024HC.5253.5253.3	3	6.31	103000	M183m M191m	(K)NVmEEATASFmPFR(S)	(K)N V m E E A T A/S/F m|P F R(S)	1629.74	31.9984	5.2
Group	Subgroup	Spectra	Distinct	Distinct	% AA	Total	Protein MW	Protein	Species	Database	Protein Name
(#)	(#)	(#)	Peptides	Summed	Coverage	Protein	(Da)	pI		Accession #
			(#)	MS/MS Search		Spectral
				Score		Intensity
64	64.1	2	1	6.27	15.3	0	13532.4	6.64	CAEEL	Q09506
#	Filename	z	Score	Spectrum	Variable	Sequence	Sequence Map	MH+	MH+	MH+
				Intensity	Sites			Matched	Mass Shift	Error
								(Da)	(Da)	(ppm)
1	ECOLIOP5024HA.4002.4002.2	2	6.27	57100	M93m	(K)ILQVNGADFTmMTHDRAVK(F)	(K)I L Q V/N G\A D F T m M T/H D R A V/K(F)	2147.07	15.9746	-9.4
Group	Subgroup	Spectra	Distinct	Distinct	% AA	Total	Protein MW	Protein	Species	Database	Protein Name
(#)	(#)	(#)	Peptides	Summed	Coverage	Protein	(Da)	pI		Accession #
			(#)	MS/MS Search		Spectral
				Score		Intensity
65	65.1	2	1	6.26	2.5	2580	34526.6	9.9	CAEEL	G5EFU2
#	Filename	z	Score	Spectrum	Variable	Sequence	Sequence Map	MH+	MH+	MH+
				Intensity	Sites			Matched	Mass Shift	Error
								(Da)	(Da)	(ppm)
1	ECOLIOP5024HB.2706.2706.2	2	6.26	764		(K)TAVAPIER(V)	(K)T A|V/A/P/I E R(V)	856.489	0.0048	5.6
2	ECOLIOP5024HA.2707.2707.2	2	6.04	1810		(K)TAVAPIER(V)	(K)T A|V|A|P I E/R(V)	856.489	-0.0019	-2.2
Group	Subgroup	Spectra	Distinct	Distinct	% AA	Total	Protein MW	Protein	Species	Database	Protein Name
(#)	(#)	(#)	Peptides	Summed	Coverage	Protein	(Da)	pI		Accession #
			(#)	MS/MS Search		Spectral
				Score		Intensity
66	66.1	1	1	6.09	1.8	10600	84656.8	8.97	CAEEL	A0A0K3ARE1
#	Filename	z	Score	Spectrum	Variable	Sequence	Sequence Map	MH+	MH+	MH+
				Intensity	Sites			Matched	Mass Shift	Error
								(Da)	(Da)	(ppm)
1	ECOLIOP5024HB.3846.3856.3	3	6.09	10600		(R)EAHGELQHNHDLDK(L)	(R)E\A H G E/L Q H N/H/D L D/K(L)	1642.76	-0.0131	-8
Group	Subgroup	Spectra	Distinct	Distinct	% AA	Total	Protein MW	Protein	Species	Database	Protein Name
(#)	(#)	(#)	Peptides	Summed	Coverage	Protein	(Da)	pI		Accession #
			(#)	MS/MS Search		Spectral
				Score		Intensity
67	67.1	2	1	6.07	1.6	215000	55502.8	6.31	CAEEL	Q09989
#	Filename	z	Score	Spectrum	Variable	Sequence	Sequence Map	MH+	MH+	MH+
				Intensity	Sites			Matched	Mass Shift	Error
								(Da)	(Da)	(ppm)
1	ECOLIOP5024HC.2245.2245.2	2	6.07	107000		(R)SADSEAVK(R)	(R)S/A|D S E|A V K(R)	806.389	0.0086	10.6
2	ECOLIOP5024HC.2248.2248.2	2	6.05	107000		(R)SADSEAVK(R)	(R)S/A|D S E|A V K(R)	806.389	0.0086	10.6
Group	Subgroup	Spectra	Distinct	Distinct	% AA	Total	Protein MW	Protein	Species	Database	Protein Name
(#)	(#)	(#)	Peptides	Summed	Coverage	Protein	(Da)	pI		Accession #
			(#)	MS/MS Search		Spectral
				Score		Intensity
68	68.1	1	1	6.05	4.1	29500	25441.8	10.96	CAEEL	A0A078BPN3
#	Filename	z	Score	Spectrum	Variable	Sequence	Sequence Map	MH+	MH+	MH+
				Intensity	Sites			Matched	Mass Shift	Error
								(Da)	(Da)	(ppm)
1	ECOLIOP5024HA.9975.9975.2	2	6.05	29500		(R)NTKNGLIPR(F)	(R)N/T/K N G L/I P\R(F)	1012.59	-0.0194	-19.2
Group	Subgroup	Spectra	Distinct	Distinct	% AA	Total	Protein MW	Protein	Species	Database	Protein Name
(#)	(#)	(#)	Peptides	Summed	Coverage	Protein	(Da)	pI		Accession #
			(#)	MS/MS Search		Spectral
				Score		Intensity
69	69.1	1	1	6.05	6.9	11400	20595.3	9.56	CAEEL	Q27GV2
#	Filename	z	Score	Spectrum	Variable	Sequence	Sequence Map	MH+	MH+	MH+
				Intensity	Sites			Matched	Mass Shift	Error
								(Da)	(Da)	(ppm)
1	ECOLIOP5024HB.4798.4798.3	3	6.05	11400		(K)HVLIRFPNKIIR(T)	(K)H V L\I R F/P/N/K I\I/R(T)	1505.94	-0.0082	-5.4
Group	Subgroup	Spectra	Distinct	Distinct	% AA	Total	Protein MW	Protein	Species	Database	Protein Name
(#)	(#)	(#)	Peptides	Summed	Coverage	Protein	(Da)	pI		Accession #
			(#)	MS/MS Search		Spectral
				Score		Intensity
70	70.1	1	1	5.99	1.8	4590	38263.4	8.86	CAEEL	B6EU60
#	Filename	z	Score	Spectrum	Variable	Sequence	Sequence Map	MH+	MH+	MH+
				Intensity	Sites			Matched	Mass Shift	Error
								(Da)	(Da)	(ppm)
1	ECOLIOP5024HA.2620.2620.2	2	5.99	4590		(K)LADRGR(V)	(K)L/A|D|R\G R(V)	687.39	0.0104	15.1
Group	Subgroup	Spectra	Distinct	Distinct	% AA	Total	Protein MW	Protein	Species	Database	Protein Name
(#)	(#)	(#)	Peptides	Summed	Coverage	Protein	(Da)	pI		Accession #
			(#)	MS/MS Search		Spectral
				Score		Intensity
71	71.1	3	1	5.96	2.4	187000	94171.3	6.19	CAEEL	O17744
#	Filename	z	Score	Spectrum	Variable	Sequence	Sequence Map	MH+	MH+	MH+
				Intensity	Sites			Matched	Mass Shift	Error
								(Da)	(Da)	(ppm)
1	ECOLIOP5024HB.3980.4015.2	2	5.96	68400		(K)YAYNNITDGAEAVLLSTYGK(S)	(K)Y A Y N\N I\T D G A E A|V L L S/T Y G/K(S)	2163.06	-0.0104	-4.8
2	ECOLIOP5024HA.3988.4024.2	2	5.48	57100		(K)YAYNNITDGAEAVLLSTYGK(S)	(K)Y A\Y N\N I\T D G A E A\V L L S/T Y G/K(S)	2163.06	-0.0122	-5.6
3	ECOLIOP5024HC.4007.4007.2	2	5.05	61700		(K)YAYNNITDGAEAVLLSTYGK(S)	(K)Y A Y N N I T D G A/E A\V L L S/T Y G/K(S)	2163.06	-0.0109	-5
Group	Subgroup	Spectra	Distinct	Distinct	% AA	Total	Protein MW	Protein	Species	Database	Protein Name
(#)	(#)	(#)	Peptides	Summed	Coverage	Protein	(Da)	pI		Accession #
			(#)	MS/MS Search		Spectral
				Score		Intensity
72	72.1	1	1	5.86	6.6	8080	21945.5	10.12	CAEEL	P34264
#	Filename	z	Score	Spectrum	Variable	Sequence	Sequence Map	MH+	MH+	MH+
				Intensity	Sites			Matched	Mass Shift	Error
								(Da)	(Da)	(ppm)
1	ECOLIOP5024HC.4743.4743.2	2	5.86	8080		(K)KEIVKVVHGALLR(T)	(K)K E I V K V/V H/G A/L L/R(T)	1461.93	-0.0237	-16.2
Group	Subgroup	Spectra	Distinct	Distinct	% AA	Total	Protein MW	Protein	Species	Database	Protein Name
(#)	(#)	(#)	Peptides	Summed	Coverage	Protein	(Da)	pI		Accession #
			(#)	MS/MS Search		Spectral
				Score		Intensity
73	73.1	1	1	5.79	6	2160	36212.6	8.58	CAEEL	H2KY79
#	Filename	z	Score	Spectrum	Variable	Sequence	Sequence Map	MH+	MH+	MH+
				Intensity	Sites			Matched	Mass Shift	Error
								(Da)	(Da)	(ppm)
1	ECOLIOP5024HB.4008.4008.4	4	5.79	2160		(K)NQSSDTPIMFKFKTTSPEK(F)	(K)N/Q S S D T P I M F K/F K T T S P/E K(F)	2186.08	-0.0399	-18.2
Group	Subgroup	Spectra	Distinct	Distinct	% AA	Total	Protein MW	Protein	Species	Database	Protein Name
(#)	(#)	(#)	Peptides	Summed	Coverage	Protein	(Da)	pI		Accession #
			(#)	MS/MS Search		Spectral
				Score		Intensity
74	74.1	1	1	5.66	1.2	109000	64769.2	8.32	CAEEL	Q9N4M3
#	Filename	z	Score	Spectrum	Variable	Sequence	Sequence Map	MH+	MH+	MH+
				Intensity	Sites			Matched	Mass Shift	Error
								(Da)	(Da)	(ppm)
1	ECOLIOP5024HB.11252.11252.2	2	5.66	109000		(K)KLLISRK(T)	(K)K/L L|I/S R/K(T)	857.593	-0.0025	-2.9
Group	Subgroup	Spectra	Distinct	Distinct	% AA	Total	Protein MW	Protein	Species	Database	Protein Name
(#)	(#)	(#)	Peptides	Summed	Coverage	Protein	(Da)	pI		Accession #
			(#)	MS/MS Search		Spectral
				Score		Intensity
75	75.1	1	1	5.63	4.8	14400	48062.5	5.31	CAEEL	Q17431
#	Filename	z	Score	Spectrum	Variable	Sequence	Sequence Map	MH+	MH+	MH+
				Intensity	Sites			Matched	Mass Shift	Error
								(Da)	(Da)	(ppm)
1	ECOLIOP5024HC.3988.3988.4	4	5.63	14400		(K)KEAPIIGASSESEDDHADTTK(K)	(K)K E/A P I I|G A|S S E S E D D/H A D T\T K(K)	2201.02	-0.0285	-13
Group	Subgroup	Spectra	Distinct	Distinct	% AA	Total	Protein MW	Protein	Species	Database	Protein Name
(#)	(#)	(#)	Peptides	Summed	Coverage	Protein	(Da)	pI		Accession #
			(#)	MS/MS Search		Spectral
				Score		Intensity
76	76.1	1	1	5.62	1.5	15500	136188	9.04	CAEEL	D7SFK4
#	Filename	z	Score	Spectrum	Variable	Sequence	Sequence Map	MH+	MH+	MH+
				Intensity	Sites			Matched	Mass Shift	Error
								(Da)	(Da)	(ppm)
1	ECOLIOP5024HB.3904.3904.3	3	5.62	15500		(K)NSGGGSGGSGGSGGSRAYK(T)	(K)N S G G G S G G S/G/G/S/G G/S/R A Y K(T)	1599.71	0.0161	10
Group	Subgroup	Spectra	Distinct	Distinct	% AA	Total	Protein MW	Protein	Species	Database	Protein Name
(#)	(#)	(#)	Peptides	Summed	Coverage	Protein	(Da)	pI		Accession #
			(#)	MS/MS Search		Spectral
				Score		Intensity
77	77.1	1	1	5.53	0.5	58700	262877	5.02	CAEEL	P34367
#	Filename	z	Score	Spectrum	Variable	Sequence	Sequence Map	MH+	MH+	MH+
				Intensity	Sites			Matched	Mass Shift	Error
								(Da)	(Da)	(ppm)
1	ECOLIOP5024HC.3728.3728.3	3	5.53	58700		(K)LEEINVSQSTSR(K)	(K)L/E E I N/V/S/Q S T S R(K)	1362.69	-0.012	-8.8
Group	Subgroup	Spectra	Distinct	Distinct	% AA	Total	Protein MW	Protein	Species	Database	Protein Name
(#)	(#)	(#)	Peptides	Summed	Coverage	Protein	(Da)	pI		Accession #
			(#)	MS/MS Search		Spectral
				Score		Intensity
78	78.1	3	1	5.52	2.1	339000	37959.1	9.98	CAEEL	F5GU62
#	Filename	z	Score	Spectrum	Variable	Sequence	Sequence Map	MH+	MH+	MH+
				Intensity	Sites			Matched	Mass Shift	Error
								(Da)	(Da)	(ppm)
1	ECOLIOP5024HA.2107.2107.2	2	5.52	116000		(R)SAKEESR(L)	(R)S A|K E E/S R(L)	806.4	-0.0018	-2.3
2	ECOLIOP5024HA.2110.2110.2	2	5.09	116000		(R)SAKEESR(L)	(R)S A|K E E|S\R(L)	806.4	-0.0018	-2.3
3	ECOLIOP5024HB.2241.2241.2	2	3.84	107000		(R)SAKEESR(L)	(R)S A|K E\E/S R(L)	806.4	-0.0006	-0.7
Group	Subgroup	Spectra	Distinct	Distinct	% AA	Total	Protein MW	Protein	Species	Database	Protein Name
(#)	(#)	(#)	Peptides	Summed	Coverage	Protein	(Da)	pI		Accession #
			(#)	MS/MS Search		Spectral
				Score		Intensity
79	79.1	1	1	5.49	1.8	18700	62410.7	6.71	CAEEL	Q95XJ7
#	Filename	z	Score	Spectrum	Variable	Sequence	Sequence Map	MH+	MH+	MH+
				Intensity	Sites			Matched	Mass Shift	Error
								(Da)	(Da)	(ppm)
1	ECOLIOP5024HA.8617.8617.2	2	5.49	18700		(K)INTGGKLELR(C)	(K)I N T G G\K/L E L/R(C)	1100.64	-0.0187	-17
Group	Subgroup	Spectra	Distinct	Distinct	% AA	Total	Protein MW	Protein	Species	Database	Protein Name
(#)	(#)	(#)	Peptides	Summed	Coverage	Protein	(Da)	pI		Accession #
			(#)	MS/MS Search		Spectral
				Score		Intensity
80	80.1	1	1	5.49	0.5	28300	123571	4.61	CAEEL	Q9N5V3
#	Filename	z	Score	Spectrum	Variable	Sequence	Sequence Map	MH+	MH+	MH+
				Intensity	Sites			Matched	Mass Shift	Error
								(Da)	(Da)	(ppm)
1	ECOLIOP5024HA.2879.2885.2	2	5.49	28300		(K)IEGPTK(V)	(K)I/E/G P T/K(V)	644.361	0.0088	13.6
Group	Subgroup	Spectra	Distinct	Distinct	% AA	Total	Protein MW	Protein	Species	Database	Protein Name
(#)	(#)	(#)	Peptides	Summed	Coverage	Protein	(Da)	pI		Accession #
			(#)	MS/MS Search		Spectral
				Score		Intensity
81	81.1	1	1	5.48	2.6	5660	53715.9	6.1	CAEEL	O61715
#	Filename	z	Score	Spectrum	Variable	Sequence	Sequence Map	MH+	MH+	MH+
				Intensity	Sites			Matched	Mass Shift	Error
								(Da)	(Da)	(ppm)
1	ECOLIOP5024HB.3341.3341.3	3	5.48	5660		(R)NWREFEEHEEMK(D)	(R)N W R E/F E/E H E/E M\K(D)	1663.72	-0.0287	-17.3
Group	Subgroup	Spectra	Distinct	Distinct	% AA	Total	Protein MW	Protein	Species	Database	Protein Name
(#)	(#)	(#)	Peptides	Summed	Coverage	Protein	(Da)	pI		Accession #
			(#)	MS/MS Search		Spectral
				Score		Intensity
82	82.1	1	1	5.46	0.8	2750	118000	5.31	CAEEL	H2KZ73
#	Filename	z	Score	Spectrum	Variable	Sequence	Sequence Map	MH+	MH+	MH+
				Intensity	Sites			Matched	Mass Shift	Error
								(Da)	(Da)	(ppm)
1	ECOLIOP5024HA.4009.4009.2	2	5.46	2750		(K)LIPGAIEIK(S)	(K)L I|P/G A I E\I K(S)	953.603	-0.0054	-5.7
Group	Subgroup	Spectra	Distinct	Distinct	% AA	Total	Protein MW	Protein	Species	Database	Protein Name
(#)	(#)	(#)	Peptides	Summed	Coverage	Protein	(Da)	pI		Accession #
			(#)	MS/MS Search		Spectral
				Score		Intensity
83	83.1	1	1	5.45	5.5	2250	49192.3	6.05	CAEEL	A0A3B1E9Z3
#	Filename	z	Score	Spectrum	Variable	Sequence	Sequence Map	MH+	MH+	MH+
				Intensity	Sites			Matched	Mass Shift	Error
								(Da)	(Da)	(ppm)
1	ECOLIOP5024HA.3679.3679.4	4	5.45	2250	M411m M416m	(R)FEmYCQVmPNVVSNGGSPRNDQAG(-)	(R)F E m Y C Q V m/P/N/V/V S N G G S P R N D Q A G(-)	2657.15	32.0321	15.7
Group	Subgroup	Spectra	Distinct	Distinct	% AA	Total	Protein MW	Protein	Species	Database	Protein Name
(#)	(#)	(#)	Peptides	Summed	Coverage	Protein	(Da)	pI		Accession #
			(#)	MS/MS Search		Spectral
				Score		Intensity
84	84.1	1	1	5.37	1.7	33100	51746.1	6.51	CAEEL	Q9TZE1
#	Filename	z	Score	Spectrum	Variable	Sequence	Sequence Map	MH+	MH+	MH+
				Intensity	Sites			Matched	Mass Shift	Error
								(Da)	(Da)	(ppm)
1	ECOLIOP5024HB.2248.2248.2	2	5.37	33100		(R)IREGKSGK(K)	(R)I/R E G K\S G K(K)	874.51	-0.0139	-15.9
Group	Subgroup	Spectra	Distinct	Distinct	% AA	Total	Protein MW	Protein	Species	Database	Protein Name
(#)	(#)	(#)	Peptides	Summed	Coverage	Protein	(Da)	pI		Accession #
			(#)	MS/MS Search		Spectral
				Score		Intensity
85	85.1	1	1	5.33	1.9	1980	70512.1	5.41	CAEEL	M1ZJY1
#	Filename	z	Score	Spectrum	Variable	Sequence	Sequence Map	MH+	MH+	MH+
				Intensity	Sites			Matched	Mass Shift	Error
								(Da)	(Da)	(ppm)
1	ECOLIOP5024HA.3924.3924.3	3	5.33	1980	M161m	(R)QVLEALGYmHEK(C)	(R)Q V\L E A L G Y m/H E K(C)	1417.71	15.9938	-0.8
Group	Subgroup	Spectra	Distinct	Distinct	% AA	Total	Protein MW	Protein	Species	Database	Protein Name
(#)	(#)	(#)	Peptides	Summed	Coverage	Protein	(Da)	pI		Accession #
			(#)	MS/MS Search		Spectral
				Score		Intensity
86	86.1	1	1	5.26	1.8	413000	37978.9	7.82	CAEEL	H2KZ70
#	Filename	z	Score	Spectrum	Variable	Sequence	Sequence Map	MH+	MH+	MH+
				Intensity	Sites			Matched	Mass Shift	Error
								(Da)	(Da)	(ppm)
1	ECOLIOP5024HA.2532.2532.2	2	5.26	413000		(R)LGSNIR(W)	(R)L|G\S|N I/R(W)	659.384	-0.002	-3
Group	Subgroup	Spectra	Distinct	Distinct	% AA	Total	Protein MW	Protein	Species	Database	Protein Name
(#)	(#)	(#)	Peptides	Summed	Coverage	Protein	(Da)	pI		Accession #
			(#)	MS/MS Search		Spectral
				Score		Intensity
87	87.1	1	1	5.22	0.6	1650	231090	9.01	CAEEL	O16237
#	Filename	z	Score	Spectrum	Variable	Sequence	Sequence Map	MH+	MH+	MH+
				Intensity	Sites			Matched	Mass Shift	Error
								(Da)	(Da)	(ppm)
1	ECOLIOP5024HC.3877.3877.3	3	5.22	1650		(K)AEDTCFKIWSSQK(L)	(K)A/E D T C F K/I W S S Q/K(L)	1599.75	-0.0243	-15.2
Group	Subgroup	Spectra	Distinct	Distinct	% AA	Total	Protein MW	Protein	Species	Database	Protein Name
(#)	(#)	(#)	Peptides	Summed	Coverage	Protein	(Da)	pI		Accession #
			(#)	MS/MS Search		Spectral
				Score		Intensity
88	88.1	1	1	5.19	2.6	5270	38552.4	6.41	CAEEL	Q18122
#	Filename	z	Score	Spectrum	Variable	Sequence	Sequence Map	MH+	MH+	MH+
				Intensity	Sites			Matched	Mass Shift	Error
								(Da)	(Da)	(ppm)
1	ECOLIOP5024HC.2967.2967.2	2	5.19	5270		(K)TPEELFAAR(S)	(K)T\P\E/E/L F A/A R(S)	1033.53	-0.016	-15.5
Group	Subgroup	Spectra	Distinct	Distinct	% AA	Total	Protein MW	Protein	Species	Database	Protein Name
(#)	(#)	(#)	Peptides	Summed	Coverage	Protein	(Da)	pI		Accession #
			(#)	MS/MS Search		Spectral
				Score		Intensity
89	89.1	4	1	5.13	8.2	5400	19593.1	9.56	CAEEL	Q19165
#	Filename	z	Score	Spectrum	Variable	Sequence	Sequence Map	MH+	MH+	MH+
				Intensity	Sites			Matched	Mass Shift	Error
								(Da)	(Da)	(ppm)
1	ECOLIOP5024HC.3346.3346.3	3	5.13	6470	M150m M158m	(K)RSmGEEEDHDmMKR(K)	(K)R S m G E E E|D H D m M K R(K)	1750.73	31.9949	2.9
2	ECOLIOP5024HB.3352.3352.3	3	3.58	5400	M150m M158m	(K)RSmGEEEDHDmMKR(K)	(K)R S m G E\E\E|D H D m M K/R(K)	1750.73	31.9917	1
Group	Subgroup	Spectra	Distinct	Distinct	% AA	Total	Protein MW	Protein	Species	Database	Protein Name
(#)	(#)	(#)	Peptides	Summed	Coverage	Protein	(Da)	pI		Accession #
			(#)	MS/MS Search		Spectral
				Score		Intensity
90	90.1	1	1	5.13	2.1	58700	63137.1	8.73	CAEEL	Q21815
#	Filename	z	Score	Spectrum	Variable	Sequence	Sequence Map	MH+	MH+	MH+
				Intensity	Sites			Matched	Mass Shift	Error
								(Da)	(Da)	(ppm)
1	ECOLIOP5024HC.3741.3741.3	3	5.13	58700		(K)LLNPESSSEVCK(A)	(K)L/L|N\P E S S S E/V C\K(A)	1362.66	0.017	12.5
Group	Subgroup	Spectra	Distinct	Distinct	% AA	Total	Protein MW	Protein	Species	Database	Protein Name
(#)	(#)	(#)	Peptides	Summed	Coverage	Protein	(Da)	pI		Accession #
			(#)	MS/MS Search		Spectral
				Score		Intensity
91	91.1	1	1	5.08	1.3	31700	117666	4.92	CAEEL	G5EC21
#	Filename	z	Score	Spectrum	Variable	Sequence	Sequence Map	MH+	MH+	MH+
				Intensity	Sites			Matched	Mass Shift	Error
								(Da)	(Da)	(ppm)
1	ECOLIOP5024HC.4252.4287.2	2	5.08	31700		(K)GGAGNGKSGDGSGDGK(N)	(K)G/G A G N G K S G D/G S G/D G/K(N)	1320.58	-0.0051	-3.8
Group	Subgroup	Spectra	Distinct	Distinct	% AA	Total	Protein MW	Protein	Species	Database	Protein Name
(#)	(#)	(#)	Peptides	Summed	Coverage	Protein	(Da)	pI		Accession #
			(#)	MS/MS Search		Spectral
				Score		Intensity
92	92.1	2	1	5.03	1.9	8760	40403	7.83	CAEEL	D3NQ95
#	Filename	z	Score	Spectrum	Variable	Sequence	Sequence Map	MH+	MH+	MH+
				Intensity	Sites			Matched	Mass Shift	Error
								(Da)	(Da)	(ppm)
1	ECOLIOP5024HB.2850.2850.2	2	5.03	5230	M239m	(K)SIHQEmR(E)	(K)S/I|H Q E m R(E)	900.436	16.0121	18.8
2	ECOLIOP5024HA.2870.2870.2	2	0.46	3540	M239m	(K)SIHQEmR(E)	(K)S I\H Q\E m R(E)	900.436	16.0106	17.1
Group	Subgroup	Spectra	Distinct	Distinct	% AA	Total	Protein MW	Protein	Species	Database	Protein Name
(#)	(#)	(#)	Peptides	Summed	Coverage	Protein	(Da)	pI		Accession #
			(#)	MS/MS Search		Spectral
				Score		Intensity
93	93.1	1	1	5.01	2.4	10000	47934.4	9.62	CAEEL	O76562
#	Filename	z	Score	Spectrum	Variable	Sequence	Sequence Map	MH+	MH+	MH+
				Intensity	Sites			Matched	Mass Shift	Error
								(Da)	(Da)	(ppm)
1	ECOLIOP5024HB.4315.4315.2	2	5.01	10000		(K)FGSFSEHDFK(Y)	(K)F G S|F S E H D/F/K(Y)	1200.53	0.0189	15.7
Group	Subgroup	Spectra	Distinct	Distinct	% AA	Total	Protein MW	Protein	Species	Database	Protein Name
(#)	(#)	(#)	Peptides	Summed	Coverage	Protein	(Da)	pI		Accession #
			(#)	MS/MS Search		Spectral
				Score		Intensity
94	94.1	2	1	4.98	2.1	206000	80126.6	8.61	CAEEL	Q18563
#	Filename	z	Score	Spectrum	Variable	Sequence	Sequence Map	MH+	MH+	MH+
				Intensity	Sites			Matched	Mass Shift	Error
								(Da)	(Da)	(ppm)
1	ECOLIOP5024HC.5256.5256.3	3	4.98	103000		(R)MGKSGDDGSQEPQGIR(H)	(R)M G K|S G D D/G S|Q E P Q/G\I R(H)	1661.76	-0.0164	-9.8
2	ECOLIOP5024HC.5167.5167.3	3	3.18	103000		(R)MGKSGDDGSQEPQGIR(H)	(R)M G K S\G D D G|S|Q\E\P Q G I R(H)	1661.76	-0.0164	-9.8
Group	Subgroup	Spectra	Distinct	Distinct	% AA	Total	Protein MW	Protein	Species	Database	Protein Name
(#)	(#)	(#)	Peptides	Summed	Coverage	Protein	(Da)	pI		Accession #
			(#)	MS/MS Search		Spectral
				Score		Intensity
95	95.1	1	1	4.97	4.8	11200	39964.2	9.58	CAEEL	Q9U8C8
#	Filename	z	Score	Spectrum	Variable	Sequence	Sequence Map	MH+	MH+	MH+
				Intensity	Sites			Matched	Mass Shift	Error
								(Da)	(Da)	(ppm)
1	ECOLIOP5024HB.3101.3101.3	3	4.97	11200	M174m	(K)DQNLWImWDECAGYRPK(V)	(K)D Q\N L W I m W D\E C A G Y/R/P K(V)	2181.99	15.9646	-13.8
Group	Subgroup	Spectra	Distinct	Distinct	% AA	Total	Protein MW	Protein	Species	Database	Protein Name
(#)	(#)	(#)	Peptides	Summed	Coverage	Protein	(Da)	pI		Accession #
			(#)	MS/MS Search		Spectral
				Score		Intensity
96	96.1	1	1	4.96	0.5	28500	123979	5.31	CAEEL	E2JKY8
#	Filename	z	Score	Spectrum	Variable	Sequence	Sequence Map	MH+	MH+	MH+
				Intensity	Sites			Matched	Mass Shift	Error
								(Da)	(Da)	(ppm)
1	ECOLIOP5024HB.2334.2334.2	2	4.96	28500		(R)LNSTDK(A)	(R)L/N/S/T\D K(A)	677.346	0.0123	18.2
Group	Subgroup	Spectra	Distinct	Distinct	% AA	Total	Protein MW	Protein	Species	Database	Protein Name
(#)	(#)	(#)	Peptides	Summed	Coverage	Protein	(Da)	pI		Accession #
			(#)	MS/MS Search		Spectral
				Score		Intensity
97	97.1	1	1	4.93	16.1	1130	11804.1	6.13	CAEEL	H2L0S3
#	Filename	z	Score	Spectrum	Variable	Sequence	Sequence Map	MH+	MH+	MH+
				Intensity	Sites			Matched	Mass Shift	Error
								(Da)	(Da)	(ppm)
1	ECOLIOP5024HB.3277.3277.4	4	4.93	1130	M16m M17m	(K)FPVVQHmmFGSLFSFDR(S)	(K)F P V V Q H\m\m\F\G S L F S F D R(S)	2044.98	31.957	-15.8
Group	Subgroup	Spectra	Distinct	Distinct	% AA	Total	Protein MW	Protein	Species	Database	Protein Name
(#)	(#)	(#)	Peptides	Summed	Coverage	Protein	(Da)	pI		Accession #
			(#)	MS/MS Search		Spectral
				Score		Intensity
98	98.1	1	1	4.88	3.9	11300	29865.5	9.33	CAEEL	Q23142
#	Filename	z	Score	Spectrum	Variable	Sequence	Sequence Map	MH+	MH+	MH+
				Intensity	Sites			Matched	Mass Shift	Error
								(Da)	(Da)	(ppm)
1	ECOLIOP5024HA.4295.4295.2	2	4.88	11300		(K)VEAYKTCSDK(L)	(K)V/E/A Y K T C S|D/K(L)	1200.56	-0.0066	-5.5
Group	Subgroup	Spectra	Distinct	Distinct	% AA	Total	Protein MW	Protein	Species	Database	Protein Name
(#)	(#)	(#)	Peptides	Summed	Coverage	Protein	(Da)	pI		Accession #
			(#)	MS/MS Search		Spectral
				Score		Intensity
99	99.1	1	1	4.86	7.5	112000	11357	10.22	CAEEL	Q9BLC2
#	Filename	z	Score	Spectrum	Variable	Sequence	Sequence Map	MH+	MH+	MH+
				Intensity	Sites			Matched	Mass Shift	Error
								(Da)	(Da)	(ppm)
1	ECOLIOP5024HA.2253.2253.2	2	4.86	112000		(R)TQSDLDK(C)	(R)T Q|S|D L/D K(C)	806.389	0.0094	11.6
Group	Subgroup	Spectra	Distinct	Distinct	% AA	Total	Protein MW	Protein	Species	Database	Protein Name
(#)	(#)	(#)	Peptides	Summed	Coverage	Protein	(Da)	pI		Accession #
			(#)	MS/MS Search		Spectral
				Score		Intensity
100	100.1	1	1	4.84	3.4	75400	63699.3	8.56	CAEEL	Q9GRV2
#	Filename	z	Score	Spectrum	Variable	Sequence	Sequence Map	MH+	MH+	MH+
				Intensity	Sites			Matched	Mass Shift	Error
								(Da)	(Da)	(ppm)
1	ECOLIOP5024HB.4037.4037.3	3	4.84	75400		(K)IDEFMDLSLDIPAQRNASK(V)	(K)I D E F|M D L S L D I P A Q R N/A/S K(V)	2163.07	-0.0233	-10.7
Group	Subgroup	Spectra	Distinct	Distinct	% AA	Total	Protein MW	Protein	Species	Database	Protein Name
(#)	(#)	(#)	Peptides	Summed	Coverage	Protein	(Da)	pI		Accession #
			(#)	MS/MS Search		Spectral
				Score		Intensity
101	101.1	1	1	4.72	2.5	31100	46791.3	5.98	CAEEL	Q18020
#	Filename	z	Score	Spectrum	Variable	Sequence	Sequence Map	MH+	MH+	MH+
				Intensity	Sites			Matched	Mass Shift	Error
								(Da)	(Da)	(ppm)
1	ECOLIOP5024HA.4267.4267.2	2	4.72	31100	M171m	(K)FDmTYNTGEVK(G)	(K)F D m T Y N|T G/E V/K(G)	1304.58	15.9893	-4.2
Group	Subgroup	Spectra	Distinct	Distinct	% AA	Total	Protein MW	Protein	Species	Database	Protein Name
(#)	(#)	(#)	Peptides	Summed	Coverage	Protein	(Da)	pI		Accession #
			(#)	MS/MS Search		Spectral
				Score		Intensity
102	102.1	1	1	4.67	0.8	25700	92512.7	6.34	CAEEL	Q9XXS6
#	Filename	z	Score	Spectrum	Variable	Sequence	Sequence Map	MH+	MH+	MH+
				Intensity	Sites			Matched	Mass Shift	Error
								(Da)	(Da)	(ppm)
1	ECOLIOP5024HC.2269.2269.2	2	4.67	25700		(K)TDRNLKK(L)	(K)T\D/R|N L K K(L)	874.51	-0.014	-16
Group	Subgroup	Spectra	Distinct	Distinct	% AA	Total	Protein MW	Protein	Species	Database	Protein Name
(#)	(#)	(#)	Peptides	Summed	Coverage	Protein	(Da)	pI		Accession #
			(#)	MS/MS Search		Spectral
				Score		Intensity
103	103.1	1	1	4.58	1.6	9460	95989.7	5.29	CAEEL	A0A163UTE6
#	Filename	z	Score	Spectrum	Variable	Sequence	Sequence Map	MH+	MH+	MH+
				Intensity	Sites			Matched	Mass Shift	Error
								(Da)	(Da)	(ppm)
1	ECOLIOP5024HC.3847.3847.2	2	4.58	9460	M104m	(R)SARNALDAEmAAMR(E)	(R)S A/R N A L D/A E m/A A M R(E)	1506.71	15.9975	1.7
Group	Subgroup	Spectra	Distinct	Distinct	% AA	Total	Protein MW	Protein	Species	Database	Protein Name
(#)	(#)	(#)	Peptides	Summed	Coverage	Protein	(Da)	pI		Accession #
			(#)	MS/MS Search		Spectral
				Score		Intensity
104	104.1	1	1	4.55	4.1	1300	39088.7	9.8	CAEEL	P92002
#	Filename	z	Score	Spectrum	Variable	Sequence	Sequence Map	MH+	MH+	MH+
				Intensity	Sites			Matched	Mass Shift	Error
								(Da)	(Da)	(ppm)
1	ECOLIOP5024HC.3355.3355.3	3	4.55	1300		(K)YLGGQSQMMSQDTK(A)	(K)Y/L G|G Q/S Q M\M/S Q D T K(A)	1573.7	0.0089	5.7
Group	Subgroup	Spectra	Distinct	Distinct	% AA	Total	Protein MW	Protein	Species	Database	Protein Name
(#)	(#)	(#)	Peptides	Summed	Coverage	Protein	(Da)	pI		Accession #
			(#)	MS/MS Search		Spectral
				Score		Intensity
105	105.1	1	1	4.54	2.3	5350	35214.6	5.46	CAEEL	Q10905
#	Filename	z	Score	Spectrum	Variable	Sequence	Sequence Map	MH+	MH+	MH+
				Intensity	Sites			Matched	Mass Shift	Error
								(Da)	(Da)	(ppm)
1	ECOLIOP5024HA.3818.3818.2	2	4.54	5350	M198m	(R)MINmGAK(V)	(R)M I N|m G/A K(V)	764.379	16.0099	19.2
Group	Subgroup	Spectra	Distinct	Distinct	% AA	Total	Protein MW	Protein	Species	Database	Protein Name
(#)	(#)	(#)	Peptides	Summed	Coverage	Protein	(Da)	pI		Accession #
			(#)	MS/MS Search		Spectral
				Score		Intensity
106	106.1	1	1	4.5	1	8380	84811	4.48	CAEEL	O17838
#	Filename	z	Score	Spectrum	Variable	Sequence	Sequence Map	MH+	MH+	MH+
				Intensity	Sites			Matched	Mass Shift	Error
								(Da)	(Da)	(ppm)
1	ECOLIOP5024HC.3727.3727.2	2	4.5	8380		(K)IETVLEEK(T)	(K)I E T|V/L/E E/K(T)	960.525	-0.0102	-10.6
Group	Subgroup	Spectra	Distinct	Distinct	% AA	Total	Protein MW	Protein	Species	Database	Protein Name
(#)	(#)	(#)	Peptides	Summed	Coverage	Protein	(Da)	pI		Accession #
			(#)	MS/MS Search		Spectral
				Score		Intensity
107	107.1	1	1	4.47	3.3	3910	30920.5	9.06	CAEEL	Q17892
#	Filename	z	Score	Spectrum	Variable	Sequence	Sequence Map	MH+	MH+	MH+
				Intensity	Sites			Matched	Mass Shift	Error
								(Da)	(Da)	(ppm)
1	ECOLIOP5024HB.4322.4322.2	2	4.47	3910		(R)DDMCAKILK(N)	(R)D D M/C A/K I/L/K(N)	1093.54	-0.0144	-13.2
Group	Subgroup	Spectra	Distinct	Distinct	% AA	Total	Protein MW	Protein	Species	Database	Protein Name
(#)	(#)	(#)	Peptides	Summed	Coverage	Protein	(Da)	pI		Accession #
			(#)	MS/MS Search		Spectral
				Score		Intensity
108	108.1	1	1	4.43	6.9	6590	23077.7	9.43	CAEEL	Q19830
#	Filename	z	Score	Spectrum	Variable	Sequence	Sequence Map	MH+	MH+	MH+
				Intensity	Sites			Matched	Mass Shift	Error
								(Da)	(Da)	(ppm)
1	ECOLIOP5024HA.4272.4272.2	2	4.43	6590	M133m	(K)GPTVGQmWDCASSR(A)	(K)G P T V G|Q\m W D C A/S S R(A)	1551.67	16.021	16.7
Group	Subgroup	Spectra	Distinct	Distinct	% AA	Total	Protein MW	Protein	Species	Database	Protein Name
(#)	(#)	(#)	Peptides	Summed	Coverage	Protein	(Da)	pI		Accession #
			(#)	MS/MS Search		Spectral
				Score		Intensity
109	109.1	2	1	4.41	1	15700	66960.1	7.85	CAEEL	Q5FC36
#	Filename	z	Score	Spectrum	Variable	Sequence	Sequence Map	MH+	MH+	MH+
				Intensity	Sites			Matched	Mass Shift	Error
								(Da)	(Da)	(ppm)
1	ECOLIOP5024HB.2198.2198.2	2	4.41	8150		(K)YIDAGK(G)	(K)Y/I/D A G K(G)	666.346	-0.002	-3
2	ECOLIOP5024HC.2199.2199.2	2	3.73	7600		(K)YIDAGK(G)	(K)Y/I|D/A G K(G)	666.346	-0.0033	-4.9
Group	Subgroup	Spectra	Distinct	Distinct	% AA	Total	Protein MW	Protein	Species	Database	Protein Name
(#)	(#)	(#)	Peptides	Summed	Coverage	Protein	(Da)	pI		Accession #
			(#)	MS/MS Search		Spectral
				Score		Intensity
110	110.1	1	1	4.37	6.3	109000	24524.2	5.42	CAEEL	O17594
#	Filename	z	Score	Spectrum	Variable	Sequence	Sequence Map	MH+	MH+	MH+
				Intensity	Sites			Matched	Mass Shift	Error
								(Da)	(Da)	(ppm)
1	ECOLIOP5024HB.5211.5211.3	3	4.37	109000	M1m	(-)mSSGFVSTSELDEEK(K)	(-)m S/S G\F V S/T S E/L D/E E K(K)	1645.73	16.0086	8.2
Group	Subgroup	Spectra	Distinct	Distinct	% AA	Total	Protein MW	Protein	Species	Database	Protein Name
(#)	(#)	(#)	Peptides	Summed	Coverage	Protein	(Da)	pI		Accession #
			(#)	MS/MS Search		Spectral
				Score		Intensity
111	111.1	1	1	4.34	1.5	11500	56225.2	4.84	CAEEL	P34423
#	Filename	z	Score	Spectrum	Variable	Sequence	Sequence Map	MH+	MH+	MH+
				Intensity	Sites			Matched	Mass Shift	Error
								(Da)	(Da)	(ppm)
1	ECOLIOP5024HA.3749.3749.2	2	4.34	11500		(K)INPADFRK(L)	(K)I N/P A D F R|K(L)	960.526	-0.0135	-14.1
Group	Subgroup	Spectra	Distinct	Distinct	% AA	Total	Protein MW	Protein	Species	Database	Protein Name
(#)	(#)	(#)	Peptides	Summed	Coverage	Protein	(Da)	pI		Accession #
			(#)	MS/MS Search		Spectral
				Score		Intensity
112	112.1	1	1	4.3	0.1	24400	388048	5.04	CAEEL	A0A1N7SYN2
#	Filename	z	Score	Spectrum	Variable	Sequence	Sequence Map	MH+	MH+	MH+
				Intensity	Sites			Matched	Mass Shift	Error
								(Da)	(Da)	(ppm)
1	ECOLIOP5024HC.2903.2903.2	2	4.3	24400		(R)LAGDIR(H)	(R)L/A/G/D I R(H)	644.373	-0.0027	-4.1
Group	Subgroup	Spectra	Distinct	Distinct	% AA	Total	Protein MW	Protein	Species	Database	Protein Name
(#)	(#)	(#)	Peptides	Summed	Coverage	Protein	(Da)	pI		Accession #
			(#)	MS/MS Search		Spectral
				Score		Intensity
113	113.1	1	1	4.29	2.5	11200	64023.3	6.61	CAEEL	O45074
#	Filename	z	Score	Spectrum	Variable	Sequence	Sequence Map	MH+	MH+	MH+
				Intensity	Sites			Matched	Mass Shift	Error
								(Da)	(Da)	(ppm)
1	ECOLIOP5024HA.3630.3630.3	3	4.29	11200		(R)LDGHVELSDDDSQR(L)	(R)L D/G H V/E\L S D D D S/Q R(L)	1585.71	-0.0027	-1.7
Group	Subgroup	Spectra	Distinct	Distinct	% AA	Total	Protein MW	Protein	Species	Database	Protein Name
(#)	(#)	(#)	Peptides	Summed	Coverage	Protein	(Da)	pI		Accession #
			(#)	MS/MS Search		Spectral
				Score		Intensity
114	114.1	1	1	4.22	5.1	3330	30976.8	5.31	CAEEL	P91061
#	Filename	z	Score	Spectrum	Variable	Sequence	Sequence Map	MH+	MH+	MH+
				Intensity	Sites			Matched	Mass Shift	Error
								(Da)	(Da)	(ppm)
1	ECOLIOP5024HB.3342.3342.3	3	4.22	3330		(R)QGHLTDPGNFECAK(V)	(R)Q\G H/L T/D P G\N/F\E/C A K(V)	1573.71	0.0003	0.2
Group	Subgroup	Spectra	Distinct	Distinct	% AA	Total	Protein MW	Protein	Species	Database	Protein Name
(#)	(#)	(#)	Peptides	Summed	Coverage	Protein	(Da)	pI		Accession #
			(#)	MS/MS Search		Spectral
				Score		Intensity
115	115.1	1	1	4.14	1.7	6820	52848.2	9.47	CAEEL	Q09436
#	Filename	z	Score	Spectrum	Variable	Sequence	Sequence Map	MH+	MH+	MH+
				Intensity	Sites			Matched	Mass Shift	Error
								(Da)	(Da)	(ppm)
1	ECOLIOP5024HB.3749.3749.2	2	4.14	6820		(R)CKFAHGLK(E)	(R)C/K F A/H G/L/K(E)	960.508	0.0061	6.3
Group	Subgroup	Spectra	Distinct	Distinct	% AA	Total	Protein MW	Protein	Species	Database	Protein Name
(#)	(#)	(#)	Peptides	Summed	Coverage	Protein	(Da)	pI		Accession #
			(#)	MS/MS Search		Spectral
				Score		Intensity
116	116.1	1	1	4.12	0.7	24400	308806	8.94	CAEEL	Q95Q95
#	Filename	z	Score	Spectrum	Variable	Sequence	Sequence Map	MH+	MH+	MH+
				Intensity	Sites			Matched	Mass Shift	Error
								(Da)	(Da)	(ppm)
1	ECOLIOP5024HA.5113.5113.2	2	4.12	24400		(K)AATTSNRIVSAPATNEFDER(H)	(K)A A T T S N\R I V S A P A T N E F D E R(H)	2150.05	-0.0333	-15.5
Group	Subgroup	Spectra	Distinct	Distinct	% AA	Total	Protein MW	Protein	Species	Database	Protein Name
(#)	(#)	(#)	Peptides	Summed	Coverage	Protein	(Da)	pI		Accession #
			(#)	MS/MS Search		Spectral
				Score		Intensity
117	117.1	1	1	4.1	14.2	6430	9244.7	11.46	CAEEL	Q7YWY8
#	Filename	z	Score	Spectrum	Variable	Sequence	Sequence Map	MH+	MH+	MH+
				Intensity	Sites			Matched	Mass Shift	Error
								(Da)	(Da)	(ppm)
1	ECOLIOP5024HB.3802.3802.2	2	4.1	6430	M26m	(R)NPmCQETAGFK(V)	(R)N P\m C\Q/E\T/A G F K(V)	1282.56	16.0103	11.8
Group	Subgroup	Spectra	Distinct	Distinct	% AA	Total	Protein MW	Protein	Species	Database	Protein Name
(#)	(#)	(#)	Peptides	Summed	Coverage	Protein	(Da)	pI		Accession #
			(#)	MS/MS Search		Spectral
				Score		Intensity
118	118.1	1	1	4.09	1.6	1160	92355.2	6.3	CAEEL	A0A0K3AQM0
#	Filename	z	Score	Spectrum	Variable	Sequence	Sequence Map	MH+	MH+	MH+
				Intensity	Sites			Matched	Mass Shift	Error
								(Da)	(Da)	(ppm)
1	ECOLIOP5024HB.3911.3911.2	2	4.09	1160	M620m	(R)CDGCNEIFRAGmK(K)	(R)C D G C/N E/I F R/A G m/K(K)	1557.66	16.0203	16.1
Group	Subgroup	Spectra	Distinct	Distinct	% AA	Total	Protein MW	Protein	Species	Database	Protein Name
(#)	(#)	(#)	Peptides	Summed	Coverage	Protein	(Da)	pI		Accession #
			(#)	MS/MS Search		Spectral
				Score		Intensity
119	119.1	1	1	4.06	1.2	118000	57751.2	7.89	CAEEL	Q27487
#	Filename	z	Score	Spectrum	Variable	Sequence	Sequence Map	MH+	MH+	MH+
				Intensity	Sites			Matched	Mass Shift	Error
								(Da)	(Da)	(ppm)
1	ECOLIOP5024HC.2930.2930.2	2	4.06	118000		(K)TRPDVK(D)	(K)T\R/P|D/V K(D)	715.41	-0.005	-6.9
Group	Subgroup	Spectra	Distinct	Distinct	% AA	Total	Protein MW	Protein	Species	Database	Protein Name
(#)	(#)	(#)	Peptides	Summed	Coverage	Protein	(Da)	pI		Accession #
			(#)	MS/MS Search		Spectral
				Score		Intensity
120	120.1	1	1	4.05	1.7	784	66342.8	8.79	CAEEL	O62090
#	Filename	z	Score	Spectrum	Variable	Sequence	Sequence Map	MH+	MH+	MH+
				Intensity	Sites			Matched	Mass Shift	Error
								(Da)	(Da)	(ppm)
1	ECOLIOP5024HB.2749.2749.3	3	4.05	784		(R)APAQLHNTIR(V)	(R)A P A Q|L H N T I/R(V)	1120.62	-0.0195	-17.4
Group	Subgroup	Spectra	Distinct	Distinct	% AA	Total	Protein MW	Protein	Species	Database	Protein Name
(#)	(#)	(#)	Peptides	Summed	Coverage	Protein	(Da)	pI		Accession #
			(#)	MS/MS Search		Spectral
				Score		Intensity
121	121.1	1	1	4	1.8	13900	44350.3	5.22	CAEEL	G5EDW7
#	Filename	z	Score	Spectrum	Variable	Sequence	Sequence Map	MH+	MH+	MH+
				Intensity	Sites			Matched	Mass Shift	Error
								(Da)	(Da)	(ppm)
1	ECOLIOP5024HB.2902.2902.2	2	4	13900		(R)DLAQKNS(-)	(R)D/L A Q|K N S(-)	775.394	-0.0023	-3
Group	Subgroup	Spectra	Distinct	Distinct	% AA	Total	Protein MW	Protein	Species	Database	Protein Name
(#)	(#)	(#)	Peptides	Summed	Coverage	Protein	(Da)	pI		Accession #
			(#)	MS/MS Search		Spectral
				Score		Intensity
122	122.1	1	1	3.96	3.5	7960	42720.2	6.44	CAEEL	O62034
#	Filename	z	Score	Spectrum	Variable	Sequence	Sequence Map	MH+	MH+	MH+
				Intensity	Sites			Matched	Mass Shift	Error
								(Da)	(Da)	(ppm)
1	ECOLIOP5024HC.4277.4277.2	2	3.96	7960	M68m	(R)IQKCFEAGmNPEK(V)	(R)I Q|K C F E A/G m N P E K(V)	1551.73	15.9694	-16.3
Group	Subgroup	Spectra	Distinct	Distinct	% AA	Total	Protein MW	Protein	Species	Database	Protein Name
(#)	(#)	(#)	Peptides	Summed	Coverage	Protein	(Da)	pI		Accession #
			(#)	MS/MS Search		Spectral
				Score		Intensity
123	123.1	1	1	3.94	1.4	14700	84914.4	9.61	CAEEL	O01497
#	Filename	z	Score	Spectrum	Variable	Sequence	Sequence Map	MH+	MH+	MH+
				Intensity	Sites			Matched	Mass Shift	Error
								(Da)	(Da)	(ppm)
1	ECOLIOP5024HC.4482.4482.3	3	3.94	14700		(K)KKIALPPGMAK(G)	(K)K K I A\L P/P G M A K(G)	1153.71	0.0092	8
Group	Subgroup	Spectra	Distinct	Distinct	% AA	Total	Protein MW	Protein	Species	Database	Protein Name
(#)	(#)	(#)	Peptides	Summed	Coverage	Protein	(Da)	pI		Accession #
			(#)	MS/MS Search		Spectral
				Score		Intensity
124	124.1	1	1	3.88	0.6	21000	130903	6.01	CAEEL	Q21049
#	Filename	z	Score	Spectrum	Variable	Sequence	Sequence Map	MH+	MH+	MH+
				Intensity	Sites			Matched	Mass Shift	Error
								(Da)	(Da)	(ppm)
1	ECOLIOP5024HA.2283.2283.2	2	3.88	21000		(R)LRVAMER(V)	(R)L/R V A\M E R(V)	874.493	0.002	2.3
Group	Subgroup	Spectra	Distinct	Distinct	% AA	Total	Protein MW	Protein	Species	Database	Protein Name
(#)	(#)	(#)	Peptides	Summed	Coverage	Protein	(Da)	pI		Accession #
			(#)	MS/MS Search		Spectral
				Score		Intensity
125	125.1	1	1	3.88	0.4	2210	138960	6.2	CAEEL	Q9N4H7
#	Filename	z	Score	Spectrum	Variable	Sequence	Sequence Map	MH+	MH+	MH+
				Intensity	Sites			Matched	Mass Shift	Error
								(Da)	(Da)	(ppm)
1	ECOLIOP5024HC.3812.3812.2	2	3.88	2210		(R)YVIWSK(S)	(R)Y/V|I W/S/K(S)	795.44	-0.0052	-6.6
Group	Subgroup	Spectra	Distinct	Distinct	% AA	Total	Protein MW	Protein	Species	Database	Protein Name
(#)	(#)	(#)	Peptides	Summed	Coverage	Protein	(Da)	pI		Accession #
			(#)	MS/MS Search		Spectral
				Score		Intensity
126	126.1	1	1	3.87	3.7	21600	49074.9	9.19	CAEEL	Q95XY8
#	Filename	z	Score	Spectrum	Variable	Sequence	Sequence Map	MH+	MH+	MH+
				Intensity	Sites			Matched	Mass Shift	Error
								(Da)	(Da)	(ppm)
1	ECOLIOP5024HA.4099.4099.3	3	3.87	21600	M401m M405m	(R)DLYLERAFmRNDmSSQR(V)	(R)D L Y\L\E R|A/F\m/R/N/D m S S Q R(V)	2132	32.0313	19.2
Group	Subgroup	Spectra	Distinct	Distinct	% AA	Total	Protein MW	Protein	Species	Database	Protein Name
(#)	(#)	(#)	Peptides	Summed	Coverage	Protein	(Da)	pI		Accession #
			(#)	MS/MS Search		Spectral
				Score		Intensity
127	127.1	1	1	3.83	3.6	15100	51221.1	9.13	CAEEL	O17898
#	Filename	z	Score	Spectrum	Variable	Sequence	Sequence Map	MH+	MH+	MH+
				Intensity	Sites			Matched	Mass Shift	Error
								(Da)	(Da)	(ppm)
1	ECOLIOP5024HA.8042.8042.3	3	3.83	15100		(K)DLHLLLVAPKVAKLPK(D)	(K)D L\H L L\L\V A P K V/A/K/L P K(D)	1755.13	0.0129	7.3
Group	Subgroup	Spectra	Distinct	Distinct	% AA	Total	Protein MW	Protein	Species	Database	Protein Name
(#)	(#)	(#)	Peptides	Summed	Coverage	Protein	(Da)	pI		Accession #
			(#)	MS/MS Search		Spectral
				Score		Intensity
128	128.1	1	1	3.69	1.3	3540	60142.4	6.92	CAEEL	B1Q250
#	Filename	z	Score	Spectrum	Variable	Sequence	Sequence Map	MH+	MH+	MH+
				Intensity	Sites			Matched	Mass Shift	Error
								(Da)	(Da)	(ppm)
1	ECOLIOP5024HA.2862.2862.2	2	3.69	3540		(R)YVLSCFK(L)	(R)Y V L S/C F K(L)	916.46	-0.0141	-15.4
Group	Subgroup	Spectra	Distinct	Distinct	% AA	Total	Protein MW	Protein	Species	Database	Protein Name
(#)	(#)	(#)	Peptides	Summed	Coverage	Protein	(Da)	pI		Accession #
			(#)	MS/MS Search		Spectral
				Score		Intensity
129	129.1	1	1	3.65	9.7	109000	15216.1	9.15	CAEEL	I2HA82
#	Filename	z	Score	Spectrum	Variable	Sequence	Sequence Map	MH+	MH+	MH+
				Intensity	Sites			Matched	Mass Shift	Error
								(Da)	(Da)	(ppm)
1	ECOLIOP5024HB.5254.5254.3	3	3.65	109000		(-)MASVDYCASEMKNR(N)	(-)M A S V D\Y/C/A S E|M K N R(N)	1661.71	0.0267	16.1
Group	Subgroup	Spectra	Distinct	Distinct	% AA	Total	Protein MW	Protein	Species	Database	Protein Name
(#)	(#)	(#)	Peptides	Summed	Coverage	Protein	(Da)	pI		Accession #
			(#)	MS/MS Search		Spectral
				Score		Intensity
130	130.1	1	1	3.62	1.4	18700	108004	6.23	CAEEL	Q4TT88
#	Filename	z	Score	Spectrum	Variable	Sequence	Sequence Map	MH+	MH+	MH+
				Intensity	Sites			Matched	Mass Shift	Error
								(Da)	(Da)	(ppm)
1	ECOLIOP5024HA.4337.4337.3	3	3.62	18700	M693m	(K)LLACAREmSEDTLK(S)	(K)L L A C A/R E m S E D\T/L/K(S)	1636.8	16.0195	14.9
Group	Subgroup	Spectra	Distinct	Distinct	% AA	Total	Protein MW	Protein	Species	Database	Protein Name
(#)	(#)	(#)	Peptides	Summed	Coverage	Protein	(Da)	pI		Accession #
			(#)	MS/MS Search		Spectral
				Score		Intensity
131	131.1	1	1	3.61	0	6920	1689639	5.01	CAEEL	A0A2I2LDV7
#	Filename	z	Score	Spectrum	Variable	Sequence	Sequence Map	MH+	MH+	MH+
				Intensity	Sites			Matched	Mass Shift	Error
								(Da)	(Da)	(ppm)
1	ECOLIOP5024HB.3808.3833.2	2	3.61	6920		(R)SESAATSK(C)	(R)S E\S A A T S K(C)	780.373	0.0134	17.2
Group	Subgroup	Spectra	Distinct	Distinct	% AA	Total	Protein MW	Protein	Species	Database	Protein Name
(#)	(#)	(#)	Peptides	Summed	Coverage	Protein	(Da)	pI		Accession #
			(#)	MS/MS Search		Spectral
				Score		Intensity
132	132.1	1	1	3.59	1.9	52300	54501	8.86	CAEEL	Q20085
#	Filename	z	Score	Spectrum	Variable	Sequence	Sequence Map	MH+	MH+	MH+
				Intensity	Sites			Matched	Mass Shift	Error
								(Da)	(Da)	(ppm)
1	ECOLIOP5024HA.2916.2924.2	2	3.59	52300	M336m M337m	(K)QmmDKAPTR(R)	(K)Q\m m D/K\A P T R(R)	1077.52	31.9746	-13.7
Group	Subgroup	Spectra	Distinct	Distinct	% AA	Total	Protein MW	Protein	Species	Database	Protein Name
(#)	(#)	(#)	Peptides	Summed	Coverage	Protein	(Da)	pI		Accession #
			(#)	MS/MS Search		Spectral
				Score		Intensity
133	133.1	1	1	3.54	1.4	21600	38963.6	9.84	CAEEL	Q21263
#	Filename	z	Score	Spectrum	Variable	Sequence	Sequence Map	MH+	MH+	MH+
				Intensity	Sites			Matched	Mass Shift	Error
								(Da)	(Da)	(ppm)
1	ECOLIOP5024HC.3423.3423.2	2	3.54	21600		(R)VCLLK(C)	(R)V/C/L L/K(C)	632.38	-0.004	-6.3
Group	Subgroup	Spectra	Distinct	Distinct	% AA	Total	Protein MW	Protein	Species	Database	Protein Name
(#)	(#)	(#)	Peptides	Summed	Coverage	Protein	(Da)	pI		Accession #
			(#)	MS/MS Search		Spectral
				Score		Intensity
134	134.1	1	1	3.53	5.5	3500	24883	9.13	CAEEL	Q17958
#	Filename	z	Score	Spectrum	Variable	Sequence	Sequence Map	MH+	MH+	MH+
				Intensity	Sites			Matched	Mass Shift	Error
								(Da)	(Da)	(ppm)
1	ECOLIOP5024HA.3916.3916.2	2	3.53	3500	M121m	(R)VLSRVPEEmSDR(H)	(R)V L/S\R V/P\E/E m S D R(H)	1417.71	16.0005	3.9
Group	Subgroup	Spectra	Distinct	Distinct	% AA	Total	Protein MW	Protein	Species	Database	Protein Name
(#)	(#)	(#)	Peptides	Summed	Coverage	Protein	(Da)	pI		Accession #
			(#)	MS/MS Search		Spectral
				Score		Intensity
135	135.1	1	1	3.51	5.7	18300	15642.7	6.84	CAEEL	Q20107
#	Filename	z	Score	Spectrum	Variable	Sequence	Sequence Map	MH+	MH+	MH+
				Intensity	Sites			Matched	Mass Shift	Error
								(Da)	(Da)	(ppm)
1	ECOLIOP5024HC.2886.2886.2	2	3.51	18300		(K)RAENCVQK(S)	(K)R\A|E N C V Q K(S)	1004.49	-0.0177	-17.6
Group	Subgroup	Spectra	Distinct	Distinct	% AA	Total	Protein MW	Protein	Species	Database	Protein Name
(#)	(#)	(#)	Peptides	Summed	Coverage	Protein	(Da)	pI		Accession #
			(#)	MS/MS Search		Spectral
				Score		Intensity
136	136.1	1	1	3.48	1	9680	135124	6.74	CAEEL	H2KY84
#	Filename	z	Score	Spectrum	Variable	Sequence	Sequence Map	MH+	MH+	MH+
				Intensity	Sites			Matched	Mass Shift	Error
								(Da)	(Da)	(ppm)
1	ECOLIOP5024HB.3791.3791.2	2	3.48	9680		(R)DNDGSTPLHTACK(N)	(R)D N D G S T P/L H/T A C K(N)	1415.62	-0.016	-11.3
Group	Subgroup	Spectra	Distinct	Distinct	% AA	Total	Protein MW	Protein	Species	Database	Protein Name
(#)	(#)	(#)	Peptides	Summed	Coverage	Protein	(Da)	pI		Accession #
			(#)	MS/MS Search		Spectral
				Score		Intensity
137	137.1	1	1	3.45	4.2	5230	21795.8	9.85	CAEEL	Q17919
#	Filename	z	Score	Spectrum	Variable	Sequence	Sequence Map	MH+	MH+	MH+
				Intensity	Sites			Matched	Mass Shift	Error
								(Da)	(Da)	(ppm)
1	ECOLIOP5024HB.2860.2860.2	2	3.45	5230		(R)MHVTMAAR(I)	(R)M H V T M\A/A R(I)	916.449	-0.0014	-1.6
Group	Subgroup	Spectra	Distinct	Distinct	% AA	Total	Protein MW	Protein	Species	Database	Protein Name
(#)	(#)	(#)	Peptides	Summed	Coverage	Protein	(Da)	pI		Accession #
			(#)	MS/MS Search		Spectral
				Score		Intensity
138	138.1	1	1	3.44	5.2	1240	36022.6	6.81	CAEEL	Q19652
#	Filename	z	Score	Spectrum	Variable	Sequence	Sequence Map	MH+	MH+	MH+
				Intensity	Sites			Matched	Mass Shift	Error
								(Da)	(Da)	(ppm)
1	ECOLIOP5024HA.4894.4894.3	3	3.44	1240		(K)TSILLAIFGANLLLKR(T)	(K)T\S I L L A/I F G A N L/L L K/R(T)	1743.09	-0.0163	-9.3
Group	Subgroup	Spectra	Distinct	Distinct	% AA	Total	Protein MW	Protein	Species	Database	Protein Name
(#)	(#)	(#)	Peptides	Summed	Coverage	Protein	(Da)	pI		Accession #
			(#)	MS/MS Search		Spectral
				Score		Intensity
139	139.1	1	1	3.43	5	6940	25194.9	5.12	CAEEL	E5QCE7
#	Filename	z	Score	Spectrum	Variable	Sequence	Sequence Map	MH+	MH+	MH+
				Intensity	Sites			Matched	Mass Shift	Error
								(Da)	(Da)	(ppm)
1	ECOLIOP5024HB.3866.3866.2	2	3.43	6940	M103m	(R)VYDEmGETGLK(L)	(R)V Y D/E m G E/T/G L K(L)	1241.57	15.9752	-15.7
Group	Subgroup	Spectra	Distinct	Distinct	% AA	Total	Protein MW	Protein	Species	Database	Protein Name
(#)	(#)	(#)	Peptides	Summed	Coverage	Protein	(Da)	pI		Accession #
			(#)	MS/MS Search		Spectral
				Score		Intensity
140	140.1	1	1	3.41	17.5	43800	9034.5	9.99	CAEEL	G3MTY9
#	Filename	z	Score	Spectrum	Variable	Sequence	Sequence Map	MH+	MH+	MH+
				Intensity	Sites			Matched	Mass Shift	Error
								(Da)	(Da)	(ppm)
1	ECOLIOP5024HA.4749.4749.3	3	3.41	43800		(R)RVPRLASSPTVEK(L)	(R)R V P\R L A\S S P T V E K(L)	1439.83	0.0262	18.2
Group	Subgroup	Spectra	Distinct	Distinct	% AA	Total	Protein MW	Protein	Species	Database	Protein Name
(#)	(#)	(#)	Peptides	Summed	Coverage	Protein	(Da)	pI		Accession #
			(#)	MS/MS Search		Spectral
				Score		Intensity
141	141.1	1	1	3.38	3.8	2070	20449.7	5.27	CAEEL	Q18567
#	Filename	z	Score	Spectrum	Variable	Sequence	Sequence Map	MH+	MH+	MH+
				Intensity	Sites			Matched	Mass Shift	Error
								(Da)	(Da)	(ppm)
1	ECOLIOP5024HA.2947.2947.2	2	3.38	2070		(K)AAARAAK(A)	(K)A/A\A\R|A\A K(A)	658.399	0.0085	12.9
Group	Subgroup	Spectra	Distinct	Distinct	% AA	Total	Protein MW	Protein	Species	Database	Protein Name
(#)	(#)	(#)	Peptides	Summed	Coverage	Protein	(Da)	pI		Accession #
			(#)	MS/MS Search		Spectral
				Score		Intensity
142	142.1	1	1	3.36	1.3	7670	68862.5	5.12	CAEEL	Q22078
#	Filename	z	Score	Spectrum	Variable	Sequence	Sequence Map	MH+	MH+	MH+
				Intensity	Sites			Matched	Mass Shift	Error
								(Da)	(Da)	(ppm)
1	ECOLIOP5024HB.3279.3279.2	2	3.36	7670		(K)EDGRAGIR(F)	(K)E/D G R A/G I R(F)	873.454	0.0026	3
Group	Subgroup	Spectra	Distinct	Distinct	% AA	Total	Protein MW	Protein	Species	Database	Protein Name
(#)	(#)	(#)	Peptides	Summed	Coverage	Protein	(Da)	pI		Accession #
			(#)	MS/MS Search		Spectral
				Score		Intensity
143	143.1	1	1	3.34	1.8	2450	67094.8	4.85	CAEEL	G5ECD8
#	Filename	z	Score	Spectrum	Variable	Sequence	Sequence Map	MH+	MH+	MH+
				Intensity	Sites			Matched	Mass Shift	Error
								(Da)	(Da)	(ppm)
1	ECOLIOP5024HA.3280.3280.3	3	3.34	2450	M53m	(R)NLEEAmNHNER(R)	(R)N L E E A m N/H/N E R(R)	1356.6	15.9836	-8.2
Group	Subgroup	Spectra	Distinct	Distinct	% AA	Total	Protein MW	Protein	Species	Database	Protein Name
(#)	(#)	(#)	Peptides	Summed	Coverage	Protein	(Da)	pI		Accession #
			(#)	MS/MS Search		Spectral
				Score		Intensity
144	144.1	1	1	3.32	3.7	298000	24892.5	9.64	CAEEL	Q9XU45
#	Filename	z	Score	Spectrum	Variable	Sequence	Sequence Map	MH+	MH+	MH+
				Intensity	Sites			Matched	Mass Shift	Error
								(Da)	(Da)	(ppm)
1	ECOLIOP5024HB.2200.2200.2	2	3.32	298000		(K)AQVASDSK(W)	(K)A Q V A/S/D S K(W)	805.405	0.0088	11
Group	Subgroup	Spectra	Distinct	Distinct	% AA	Total	Protein MW	Protein	Species	Database	Protein Name
(#)	(#)	(#)	Peptides	Summed	Coverage	Protein	(Da)	pI		Accession #
			(#)	MS/MS Search		Spectral
				Score		Intensity
145	145.1	1	1	3.29	0.3	7620	252644	9.2	CAEEL	Q20007
#	Filename	z	Score	Spectrum	Variable	Sequence	Sequence Map	MH+	MH+	MH+
				Intensity	Sites			Matched	Mass Shift	Error
								(Da)	(Da)	(ppm)
1	ECOLIOP5024HA.9362.9362.2	2	3.29	7620		(K)LAKKAPAK(K)	(K)L/A K K A/P A/K(K)	826.551	-0.0036	-4.4
Group	Subgroup	Spectra	Distinct	Distinct	% AA	Total	Protein MW	Protein	Species	Database	Protein Name
(#)	(#)	(#)	Peptides	Summed	Coverage	Protein	(Da)	pI		Accession #
			(#)	MS/MS Search		Spectral
				Score		Intensity
146	146.1	1	1	3.28	1	9780	124347	7.26	CAEEL	G5EG74
#	Filename	z	Score	Spectrum	Variable	Sequence	Sequence Map	MH+	MH+	MH+
				Intensity	Sites			Matched	Mass Shift	Error
								(Da)	(Da)	(ppm)
1	ECOLIOP5024HC.3411.3411.2	2	3.28	9780		(R)GDELKGTNAEK(R)	(R)G D\E L/K G T N\A E/K(R)	1161.58	-0.0138	-11.9
Group	Subgroup	Spectra	Distinct	Distinct	% AA	Total	Protein MW	Protein	Species	Database	Protein Name
(#)	(#)	(#)	Peptides	Summed	Coverage	Protein	(Da)	pI		Accession #
			(#)	MS/MS Search		Spectral
				Score		Intensity
147	147.1	1	1	3.24	0.6	7490	215547	9.33	CAEEL	F0IWT2
#	Filename	z	Score	Spectrum	Variable	Sequence	Sequence Map	MH+	MH+	MH+
				Intensity	Sites			Matched	Mass Shift	Error
								(Da)	(Da)	(ppm)
1	ECOLIOP5024HB.4979.4979.2	2	3.24	7490		(K)EPAFIVAHYAGK(V)	(K)E P A F/I/V A H/Y A G K(V)	1302.68	0.0237	18.2
Group	Subgroup	Spectra	Distinct	Distinct	% AA	Total	Protein MW	Protein	Species	Database	Protein Name
(#)	(#)	(#)	Peptides	Summed	Coverage	Protein	(Da)	pI		Accession #
			(#)	MS/MS Search		Spectral
				Score		Intensity
148	148.1	1	1	3.23	0.6	7470	286129	6.73	CAEEL	E9P860
#	Filename	z	Score	Spectrum	Variable	Sequence	Sequence Map	MH+	MH+	MH+
				Intensity	Sites			Matched	Mass Shift	Error
								(Da)	(Da)	(ppm)
1	ECOLIOP5024HA.3683.3683.3	3	3.23	7470		(K)CEHQSCGAGERGFGR(D)	(K)C E H Q S C\G A/G E R G F\G R(D)	1707.71	-0.0194	-11.4
Group	Subgroup	Spectra	Distinct	Distinct	% AA	Total	Protein MW	Protein	Species	Database	Protein Name
(#)	(#)	(#)	Peptides	Summed	Coverage	Protein	(Da)	pI		Accession #
			(#)	MS/MS Search		Spectral
				Score		Intensity
149	149.1	1	1	3.18	3	3490	26976.5	9.76	CAEEL	Q8T7Z2
#	Filename	z	Score	Spectrum	Variable	Sequence	Sequence Map	MH+	MH+	MH+
				Intensity	Sites			Matched	Mass Shift	Error
								(Da)	(Da)	(ppm)
1	ECOLIOP5024HB.3334.3334.2	2	3.18	3490		(R)YSVSLPR(T)	(R)Y S|V S/L P R(T)	821.452	-0.0129	-15.6
Group	Subgroup	Spectra	Distinct	Distinct	% AA	Total	Protein MW	Protein	Species	Database	Protein Name
(#)	(#)	(#)	Peptides	Summed	Coverage	Protein	(Da)	pI		Accession #
			(#)	MS/MS Search		Spectral
				Score		Intensity
150	150.1	1	1	3.15	7.3	15500	22635.2	6.42	CAEEL	Q17984
#	Filename	z	Score	Spectrum	Variable	Sequence	Sequence Map	MH+	MH+	MH+
				Intensity	Sites			Matched	Mass Shift	Error
								(Da)	(Da)	(ppm)
1	ECOLIOP5024HC.3845.3845.3	3	3.15	15500		(R)MDSQCSGQQAKTSSK(A)	(R)M D S Q C/S G\Q Q\A K T\S S/K(A)	1642.72	0.0222	13.5
Group	Subgroup	Spectra	Distinct	Distinct	% AA	Total	Protein MW	Protein	Species	Database	Protein Name
(#)	(#)	(#)	Peptides	Summed	Coverage	Protein	(Da)	pI		Accession #
			(#)	MS/MS Search		Spectral
				Score		Intensity
151	151.1	1	1	3.14	0.6	1280	194162	6.98	CAEEL	G5ECM4
#	Filename	z	Score	Spectrum	Variable	Sequence	Sequence Map	MH+	MH+	MH+
				Intensity	Sites			Matched	Mass Shift	Error
								(Da)	(Da)	(ppm)
1	ECOLIOP5024HA.3438.3438.2	2	3.14	1280		(K)MVHDYVTTIPR(I)	(K)M|V H D Y V/T/T I P R(I)	1331.68	-0.0257	-19.3
Group	Subgroup	Spectra	Distinct	Distinct	% AA	Total	Protein MW	Protein	Species	Database	Protein Name
(#)	(#)	(#)	Peptides	Summed	Coverage	Protein	(Da)	pI		Accession #
			(#)	MS/MS Search		Spectral
				Score		Intensity
152	152.1	1	1	3.08	3.3	321000	29947.4	9.74	CAEEL	Q20293
#	Filename	z	Score	Spectrum	Variable	Sequence	Sequence Map	MH+	MH+	MH+
				Intensity	Sites			Matched	Mass Shift	Error
								(Da)	(Da)	(ppm)
1	ECOLIOP5024HC.4209.4209.2	2	3.08	321000		(K)KSAAALIAK(K)	(K)K S A\A/A L/I A/K(K)	872.556	-0.0165	-18.9
Group	Subgroup	Spectra	Distinct	Distinct	% AA	Total	Protein MW	Protein	Species	Database	Protein Name
(#)	(#)	(#)	Peptides	Summed	Coverage	Protein	(Da)	pI		Accession #
			(#)	MS/MS Search		Spectral
				Score		Intensity
153	153.1	1	1	3.07	2.3	20800	39028.5	9.33	CAEEL	O44544
#	Filename	z	Score	Spectrum	Variable	Sequence	Sequence Map	MH+	MH+	MH+
				Intensity	Sites			Matched	Mass Shift	Error
								(Da)	(Da)	(ppm)
1	ECOLIOP5024HC.3317.3317.2	2	3.07	20800		(K)HTSSHISV(-)	(K)H T\S\S/H I S V(-)	867.432	-0.0145	-16.7
Group	Subgroup	Spectra	Distinct	Distinct	% AA	Total	Protein MW	Protein	Species	Database	Protein Name
(#)	(#)	(#)	Peptides	Summed	Coverage	Protein	(Da)	pI		Accession #
			(#)	MS/MS Search		Spectral
				Score		Intensity
154	154.1	1	1	3.06	2.3	3720	75072.9	9.35	CAEEL	Q21572
#	Filename	z	Score	Spectrum	Variable	Sequence	Sequence Map	MH+	MH+	MH+
				Intensity	Sites			Matched	Mass Shift	Error
								(Da)	(Da)	(ppm)
1	ECOLIOP5024HC.3625.3625.3	3	3.06	3720	M657m	(K)SDKTGTSGSmEKAGSK(E)	(K)S D K/T G T S G S/m E K A G S K(E)	1570.74	15.9757	-12.1
Group	Subgroup	Spectra	Distinct	Distinct	% AA	Total	Protein MW	Protein	Species	Database	Protein Name
(#)	(#)	(#)	Peptides	Summed	Coverage	Protein	(Da)	pI		Accession #
			(#)	MS/MS Search		Spectral
				Score		Intensity
155	155.1	1	1	3.06	8.3	34200	17905.7	4.89	CAEEL	Q22790
#	Filename	z	Score	Spectrum	Variable	Sequence	Sequence Map	MH+	MH+	MH+
				Intensity	Sites			Matched	Mass Shift	Error
								(Da)	(Da)	(ppm)
1	ECOLIOP5024HB.4264.4289.2	2	3.06	34200		(R)AGDSAAADEEEKK(K)	(R)A G\D S A A A D E/E E K/K(K)	1320.59	-0.0164	-12.4
Group	Subgroup	Spectra	Distinct	Distinct	% AA	Total	Protein MW	Protein	Species	Database	Protein Name
(#)	(#)	(#)	Peptides	Summed	Coverage	Protein	(Da)	pI		Accession #
			(#)	MS/MS Search		Spectral
				Score		Intensity
156	156.1	1	1	3.03	2.9	63400	31363.7	5.84	CAEEL	G4SHR1
#	Filename	z	Score	Spectrum	Variable	Sequence	Sequence Map	MH+	MH+	MH+
				Intensity	Sites			Matched	Mass Shift	Error
								(Da)	(Da)	(ppm)
1	ECOLIOP5024HB.4196.4196.2	2	3.03	63400	M56m	(R)NLmATALK(N)	(R)N L/m A/T/A\L K(N)	861.486	16.0083	15.3
Group	Subgroup	Spectra	Distinct	Distinct	% AA	Total	Protein MW	Protein	Species	Database	Protein Name
(#)	(#)	(#)	Peptides	Summed	Coverage	Protein	(Da)	pI		Accession #
			(#)	MS/MS Search		Spectral
				Score		Intensity
157	157.1	1	1	3.02	0.4	2430	253154	6.24	CAEEL	G4RT15
#	Filename	z	Score	Spectrum	Variable	Sequence	Sequence Map	MH+	MH+	MH+
				Intensity	Sites			Matched	Mass Shift	Error
								(Da)	(Da)	(ppm)
1	ECOLIOP5024HA.3391.3391.2	2	3.02	2430		(R)SSTGATNRK(R)	(R)S/S T G A/T/N R K(R)	921.475	0.0171	18.6
Group	Subgroup	Spectra	Distinct	Distinct	% AA	Total	Protein MW	Protein	Species	Database	Protein Name
(#)	(#)	(#)	Peptides	Summed	Coverage	Protein	(Da)	pI		Accession #
			(#)	MS/MS Search		Spectral
				Score		Intensity
158	158.1	1	1	3.01	10.8	8430	15747.8	9.3	CAEEL	Q22903
#	Filename	z	Score	Spectrum	Variable	Sequence	Sequence Map	MH+	MH+	MH+
				Intensity	Sites			Matched	Mass Shift	Error
								(Da)	(Da)	(ppm)
1	ECOLIOP5024HA.4855.4855.3	3	3.01	8430		(K)LLVLISIIFVEARGR(Y)	(K)L L V\L I S I I F/V E/A R\G R(Y)	1699.06	-0.0083	-4.9
Group	Subgroup	Spectra	Distinct	Distinct	% AA	Total	Protein MW	Protein	Species	Database	Protein Name
(#)	(#)	(#)	Peptides	Summed	Coverage	Protein	(Da)	pI		Accession #
			(#)	MS/MS Search		Spectral
				Score		Intensity
159	159.1	1	1	2.91	3.7	1740	37534.3	9.39	CAEEL	Q9XUV6
#	Filename	z	Score	Spectrum	Variable	Sequence	Sequence Map	MH+	MH+	MH+
				Intensity	Sites			Matched	Mass Shift	Error
								(Da)	(Da)	(ppm)
1	ECOLIOP5024HA.3618.3618.3	3	2.91	1740		(K)DANRYSVIQDER(F)	(K)D A N R Y|S V\I Q/D E R(F)	1465.7	-0.0166	-11.3
Group	Subgroup	Spectra	Distinct	Distinct	% AA	Total	Protein MW	Protein	Species	Database	Protein Name
(#)	(#)	(#)	Peptides	Summed	Coverage	Protein	(Da)	pI		Accession #
			(#)	MS/MS Search		Spectral
				Score		Intensity
160	160.1	1	1	2.82	3.1	22300	51984.3	8.87	CAEEL	Q10052
#	Filename	z	Score	Spectrum	Variable	Sequence	Sequence Map	MH+	MH+	MH+
				Intensity	Sites			Matched	Mass Shift	Error
								(Da)	(Da)	(ppm)
1	ECOLIOP5024HC.3929.3929.2	2	2.82	22300		(K)TSNEYTAGMWDQLK(V)	(K)T S N E Y T A\G/M W D Q\L K(V)	1643.74	-0.0204	-12.4
Group	Subgroup	Spectra	Distinct	Distinct	% AA	Total	Protein MW	Protein	Species	Database	Protein Name
(#)	(#)	(#)	Peptides	Summed	Coverage	Protein	(Da)	pI		Accession #
			(#)	MS/MS Search		Spectral
				Score		Intensity
161	161.1	1	1	2.75	4.1	1560	39834.5	5.97	CAEEL	O76655
#	Filename	z	Score	Spectrum	Variable	Sequence	Sequence Map	MH+	MH+	MH+
				Intensity	Sites			Matched	Mass Shift	Error
								(Da)	(Da)	(ppm)
1	ECOLIOP5024HA.3901.3901.3	3	2.75	1560		(R)MSAAREPSNSQSSK(I)	(R)M S A A R E P/S/N S Q S S K(I)	1479.69	0.0213	14.4
Group	Subgroup	Spectra	Distinct	Distinct	% AA	Total	Protein MW	Protein	Species	Database	Protein Name
(#)	(#)	(#)	Peptides	Summed	Coverage	Protein	(Da)	pI		Accession #
			(#)	MS/MS Search		Spectral
				Score		Intensity
162	162.1	1	1	2.71	5.1	66900	27087.4	7.97	CAEEL	Q8MXS8
#	Filename	z	Score	Spectrum	Variable	Sequence	Sequence Map	MH+	MH+	MH+
				Intensity	Sites			Matched	Mass Shift	Error
								(Da)	(Da)	(ppm)
1	ECOLIOP5024HC.4748.4748.3	3	2.71	66900		(R)LTRAALPHIITTK(G)	(R)L/T R A\A L P H I I/T T K(G)	1434.88	0.0263	18.3
Group	Subgroup	Spectra	Distinct	Distinct	% AA	Total	Protein MW	Protein	Species	Database	Protein Name
(#)	(#)	(#)	Peptides	Summed	Coverage	Protein	(Da)	pI		Accession #
			(#)	MS/MS Search		Spectral
				Score		Intensity
163	163.1	1	1	2.67	2.8	11100	36637.5	10.06	CAEEL	O16492
#	Filename	z	Score	Spectrum	Variable	Sequence	Sequence Map	MH+	MH+	MH+
				Intensity	Sites			Matched	Mass Shift	Error
								(Da)	(Da)	(ppm)
1	ECOLIOP5024HA.4445.4445.3	3	2.67	11100		(K)TIRIDCLLK(L)	(K)T\I/R|I D C L L K(L)	1131.65	0.0028	2.5
Group	Subgroup	Spectra	Distinct	Distinct	% AA	Total	Protein MW	Protein	Species	Database	Protein Name
(#)	(#)	(#)	Peptides	Summed	Coverage	Protein	(Da)	pI		Accession #
			(#)	MS/MS Search		Spectral
				Score		Intensity
164	164.1	1	1	2.65	0.3	11500	240205	5.08	CAEEL	Q21281
#	Filename	z	Score	Spectrum	Variable	Sequence	Sequence Map	MH+	MH+	MH+
				Intensity	Sites			Matched	Mass Shift	Error
								(Da)	(Da)	(ppm)
1	ECOLIOP5024HA.3725.3725.2	2	2.65	11500		(R)NPGRTCKK(L)	(R)N/P\G R T C K/K(L)	960.504	0.0083	8.6
Group	Subgroup	Spectra	Distinct	Distinct	% AA	Total	Protein MW	Protein	Species	Database	Protein Name
(#)	(#)	(#)	Peptides	Summed	Coverage	Protein	(Da)	pI		Accession #
			(#)	MS/MS Search		Spectral
				Score		Intensity
165	165.1	1	1	2.55	2.6	5200	55374.1	6.87	CAEEL	A0A131MB05
#	Filename	z	Score	Spectrum	Variable	Sequence	Sequence Map	MH+	MH+	MH+
				Intensity	Sites			Matched	Mass Shift	Error
								(Da)	(Da)	(ppm)
1	ECOLIOP5024HC.3611.3611.3	3	2.55	5200		(R)DESGKDFQFIDER(G)	(R)D E/S G K D F Q F/I/D E/R(G)	1585.71	-0.0128	-8.1
Group	Subgroup	Spectra	Distinct	Distinct	% AA	Total	Protein MW	Protein	Species	Database	Protein Name
(#)	(#)	(#)	Peptides	Summed	Coverage	Protein	(Da)	pI		Accession #
			(#)	MS/MS Search		Spectral
				Score		Intensity
166	166.1	1	1	2.45	0.5	2050	251017	8.33	CAEEL	G5EDC5
#	Filename	z	Score	Spectrum	Variable	Sequence	Sequence Map	MH+	MH+	MH+
				Intensity	Sites			Matched	Mass Shift	Error
								(Da)	(Da)	(ppm)
1	ECOLIOP5024HB.3824.3824.2	2	2.45	2050		(R)AQLARSLSVSPSK(K)	(R)A Q\L\A R S L S V/S P S K(K)	1343.76	-0.0096	-7.1
Group	Subgroup	Spectra	Distinct	Distinct	% AA	Total	Protein MW	Protein	Species	Database	Protein Name
(#)	(#)	(#)	Peptides	Summed	Coverage	Protein	(Da)	pI		Accession #
			(#)	MS/MS Search		Spectral
				Score		Intensity
167	167.1	1	1	2.43	1.8	9050	61812.3	5.94	CAEEL	Q19722
#	Filename	z	Score	Spectrum	Variable	Sequence	Sequence Map	MH+	MH+	MH+
				Intensity	Sites			Matched	Mass Shift	Error
								(Da)	(Da)	(ppm)
1	ECOLIOP5024HC.3392.3392.3	3	2.43	9050		(K)NDVRNEMGEK(F)	(K)N D V R N E M/G E\K(F)	1191.54	-0.0213	-17.9
Group	Subgroup	Spectra	Distinct	Distinct	% AA	Total	Protein MW	Protein	Species	Database	Protein Name
(#)	(#)	(#)	Peptides	Summed	Coverage	Protein	(Da)	pI		Accession #
			(#)	MS/MS Search		Spectral
				Score		Intensity
168	168.1	1	1	2.23	1.1	18300	80899.5	9.21	CAEEL	G5EBX9
#	Filename	z	Score	Spectrum	Variable	Sequence	Sequence Map	MH+	MH+	MH+
				Intensity	Sites			Matched	Mass Shift	Error
								(Da)	(Da)	(ppm)
1	ECOLIOP5024HC.2909.2909.2	2	2.23	18300		(R)CEARLEAR(R)	(R)C E/A R\L\E A R(R)	1004.49	-0.0177	-17.6
Group	Subgroup	Spectra	Distinct	Distinct	% AA	Total	Protein MW	Protein	Species	Database	Protein Name
(#)	(#)	(#)	Peptides	Summed	Coverage	Protein	(Da)	pI		Accession #
			(#)	MS/MS Search		Spectral
				Score		Intensity
169	169.1	1	1	2.21	1.8	1660	31939.3	5.59	CAEEL	G5ECU6
#	Filename	z	Score	Spectrum	Variable	Sequence	Sequence Map	MH+	MH+	MH+
				Intensity	Sites			Matched	Mass Shift	Error
								(Da)	(Da)	(ppm)
1	ECOLIOP5024HA.3313.3313.2	2	2.21	1660		(K)HFQRLR(K)	(K)H F|Q R\L R(K)	856.49	-0.0032	-3.8
Group	Subgroup	Spectra	Distinct	Distinct	% AA	Total	Protein MW	Protein	Species	Database	Protein Name
(#)	(#)	(#)	Peptides	Summed	Coverage	Protein	(Da)	pI		Accession #
			(#)	MS/MS Search		Spectral
				Score		Intensity
170	170.1	1	1	1.74	1.4	17500	59605.5	8.32	CAEEL	Q09623
#	Filename	z	Score	Spectrum	Variable	Sequence	Sequence Map	MH+	MH+	MH+
				Intensity	Sites			Matched	Mass Shift	Error
								(Da)	(Da)	(ppm)
1	ECOLIOP5024HB.3798.3814.2	2	1.74	17500		(K)IVNESII(-)	(K)I V/N E S/I I(-)	787.456	-0.0017	-2.1
Group	Subgroup	Spectra	Distinct	Distinct	% AA	Total	Protein MW	Protein	Species	Database	Protein Name
(#)	(#)	(#)	Peptides	Summed	Coverage	Protein	(Da)	pI		Accession #
			(#)	MS/MS Search		Spectral
				Score		Intensity
171	171.1	1	1	1.44	2.8	30100	40941	5.77	CAEEL	Q8I4G2
#	Filename	z	Score	Spectrum	Variable	Sequence	Sequence Map	MH+	MH+	MH+
				Intensity	Sites			Matched	Mass Shift	Error
								(Da)	(Da)	(ppm)
1	ECOLIOP5024HC.4631.4631.2	2	1.44	30100		(K)LKRLSISFCK(G)	(K)L K R|L\S\I S/F C K(G)	1251.72	0.0209	16.7
Group	Subgroup	Spectra	Distinct	Distinct	% AA	Total	Protein MW	Protein	Species	Database	Protein Name
(#)	(#)	(#)	Peptides	Summed	Coverage	Protein	(Da)	pI		Accession #
			(#)	MS/MS Search		Spectral
				Score		Intensity
172	172.1	1	1	1.33	1.7	2660	85898.4	5.4	CAEEL	Q95Q40
#	Filename	z	Score	Spectrum	Variable	Sequence	Sequence Map	MH+	MH+	MH+
				Intensity	Sites			Matched	Mass Shift	Error
								(Da)	(Da)	(ppm)
1	ECOLIOP5024HC.3913.3913.2	2	1.33	2660		(K)SESRAAIAIDNMR(V)	(K)S E S\R A A I/A I D/N M R(V)	1433.72	-0.0043	-3
Group	Subgroup	Spectra	Distinct	Distinct	% AA	Total	Protein MW	Protein	Species	Database	Protein Name
(#)	(#)	(#)	Peptides	Summed	Coverage	Protein	(Da)	pI		Accession #
			(#)	MS/MS Search		Spectral
				Score		Intensity
173	173.1	1	1	1.15	3.2	3090	46457.4	9.96	CAEEL	B3WFV2
#	Filename	z	Score	Spectrum	Variable	Sequence	Sequence Map	MH+	MH+	MH+
				Intensity	Sites			Matched	Mass Shift	Error
								(Da)	(Da)	(ppm)
1	ECOLIOP5024HB.3902.3902.2	2	1.15	3090		(R)QSNVQLVQSMSGR(T)	(R)Q\S N V Q L\V Q\S|M S G R(T)	1433.72	-0.0018	-1.2
Group	Subgroup	Spectra	Distinct	Distinct	% AA	Total	Protein MW	Protein	Species	Database	Protein Name
(#)	(#)	(#)	Peptides	Summed	Coverage	Protein	(Da)	pI		Accession #
			(#)	MS/MS Search		Spectral
				Score		Intensity
174	174.1	1	1	0.7	3.4	12700	23748.9	9.76	CAEEL	Q7YWV0
#	Filename	z	Score	Spectrum	Variable	Sequence	Sequence Map	MH+	MH+	MH+
				Intensity	Sites			Matched	Mass Shift	Error
								(Da)	(Da)	(ppm)
1	ECOLIOP5024HA.3855.3855.2	2	0.7	12700		(K)RQASTPK(R)	(K)R Q A/S T P/K(R)	787.442	0.0101	12.8
Group	Subgroup	Spectra	Distinct	Distinct	% AA	Total	Protein MW	Protein	Species	Database	Protein Name
(#)	(#)	(#)	Peptides	Summed	Coverage	Protein	(Da)	pI		Accession #
			(#)	MS/MS Search		Spectral
				Score		Intensity
175	175.1	1	1	0.54	3.9	989	41881.7	4.88	CAEEL	Q95XT8
#	Filename	z	Score	Spectrum	Variable	Sequence	Sequence Map	MH+	MH+	MH+
				Intensity	Sites			Matched	Mass Shift	Error
								(Da)	(Da)	(ppm)
1	ECOLIOP5024HC.5246.5246.3	3	0.54	989		(K)VEQMEEDDGEQRAK(S)	(K)V E Q M E E D D/G|E Q/R A K(S)	1663.72	0.013	7.8

## Sheet: Protein-Protein Comparision
Spectrum Mill - Protein Peptide/Summary
Results Shown Filtered by Validation Category: sequence-not-validated
Data Directory: msdataSM\ECOLIOP5024HA - SpecFeatures read
Retrieving all hits from tagSummary file.
all hits read from tagSummary file num hits: 170
original hits subset determined from files: 91 Files: 91 Hits: 158
Data Directory: msdataSM\ECOLIOP5024HC - SpecFeatures read
Retrieving all hits from tagSummary file.
all hits read from tagSummary file num hits: 144
original hits subset determined from files: 80 Files: 80 Hits: 143
Data Directory: msdataSM\ECOLIOP5024HB - SpecFeatures read
Retrieving all hits from tagSummary file.
all hits read from tagSummary file num hits: 179
original hits subset determined from files: 82 Files: 82 Hits: 175
beginning to assemble proteins .... proteins assembled 0.020277 sec
proteins filtered by distinct peptides 0.00463 sec
proteins filtered by score
calculated protein coverage maps 0.124085 sec
beginning to roll up 299 proteins into groups ...
Sorted peptides by length to accelerate peptide roll up 0.004098 sec
completed primary peptide roll up 3029 sequence comparisons 0.05158 sec
completed post roll up subgrouping and sorting 0.003553 sec
Finished protein roll up into 175 groups 0.06009 sec
protein groups ready for display
proteinGroupingMethod: oneSharedPeptideSubgrouped Subgroups expanded 6.70e-002 sec
total intensity: sum of intensity for all spectra of peptides belonging to protein
ECOLIOP5024HA	ECOLIOP5024HC	ECOLIOP5024HB	Columns	Spectra	Protein MW	Protein	Species	# Rank 1	# Shared	# Shared	Shared	# Distinct	# Distinct	Distinct	# Distinct	Database	%AA	Distinct	Distinct	Group	Subgroup	Protein Name
# spectra	# spectra	# spectra	Protein	Protein	(Da)	pI		Species Present	Peptides	Spectra	Total	Peptides	Spectra	Total	Peptides Species 2	Accession #	Coverage	Peptides	Summed	#	#
total intensity	total intensity	total intensity	Observed	Observed							Intensity	Species 1	Species 1	Intensity				(#CI)	MS/MS Search
			(#)	(#)										Species 1					Score
3	4	5	3	12	42137.4	5.3	CAEEL	1			0	4	12	126000	0	P0DM41	7.9	4	43.29	1	1.1
13500	47300	64900
3	1	3	3	7	47543.9	9.37	CAEEL	1			0	2	7	28000	0	G8JY74	4.6	2	22.04	2	2.1
12800	3080	12100
1	1	2	3	4	53610.1	6.17	CAEEL	1			0	1	4	1690000	0	Q09400	1.2	1	16.18	3	3.1
413000	418000	855000
1	1	1	3	3	40860	5.86	CAEEL	1			0	1	3	270000	0	Q17930	5.4	1	14.97	4	4.1
89300	91300	89300
1	0	1	2	2	461741	5.2	CAEEL	1			0	1	2	45300	0	H2L075	0.1	1	14	5	5.1
20600	0	24700
1	3	1	3	5	38009.2	8.8	CAEEL	1			0	1	5	93100	0	V6CLB7	1.8	1	13.45	6	6.1
20400	49600	23000
1	1	0	2	2	45367.3	8.38	CAEEL	1			0	1	2	19800	0	Q22401	4.2	1	12.95	7	7.1
10700	9090	0
2	3	1	3	6	63688.4	5.62	CAEEL	1			0	1	6	697000	0	Q9N4P3	1	1	12.83	8	8.1
239000	340000	119000
1	0	0	1	1	109608	4.37	CAEEL	1			0	1	1	69000	0	Q09560	0.9	1	12.76	9	9.1
69000	0	0
1	1	1	3	3	31791.1	9.38	CAEEL	1			0	1	3	183000	0	G5EFI9	3.2	1	12.7	10	10.1
69000	57100	56500
1	1	2	3	4	74997.9	8.26	CAEEL	1			0	1	4	277000	0	O62139	2.7	1	12.09	11	11.1
64200	61700	151000
0	1	0	1	1	67827.4	7.75	CAEEL	1			0	1	1	18800	0	O18256	1.6	1	11.36	12	12.1
0	18800	0
1	0	0	1	1	69278	7.22	CAEEL	1			0	1	1	112000	0	Q22802	3.5	1	11	13	13.1
112000	0	0
0	1	1	2	2	22398.9	4.75	CAEEL	1			0	2	2	82300	0	Q21392	10.4	2	10.33	14	14.1
0	13900	68400
2	0	1	2	3	55271.1	8.69	CAEEL	1			0	1	3	929000	0	H2KZ09	1	1	10.29	15	15.1
620000	0	309000
1	1	0	2	2	35646.7	9.43	CAEEL	1			0	1	2	25600	0	Q7YXD2	2.2	1	10.23	16	16.1
12700	12900	0
0	1	0	1	1	46529.3	8.77	CAEEL	1			0	1	1	71800	0	Q19683	4.6	1	10.1	17	17.1
0	71800	0
0	1	0	1	1	29126.7	6.24	CAEEL	1			0	1	1	65300	0	Q19812	2.8	1	9.98	18	18.1
0	65300	0
0	0	1	1	1	80278.2	8.64	CAEEL	1			0	1	1	2720	0	Q21153	2.6	1	9.91	19	19.1
0	0	2720
1	1	1	3	3	43108.5	6.16	CAEEL	1			0	1	3	55200	0	H2L0L6	1.6	1	9.74	20	20.1
13700	16600	24900
0	0	1	1	1	31152.8	9.58	CAEEL	1			0	1	1	45200	0	Q18611	5.5	1	9.73	21	21.1
0	0	45200
1	1	0	2	2	39478.2	6.48	CAEEL	1			0	1	2	230000	0	G5EGG8	2.2	1	9.71	22	22.1
116000	114000	0
1	0	0	1	1	69685.1	6.48	CAEEL	1			0	1	1	5790	0	H2L034	2	1	9.21	23	23.1
5790	0	0
0	0	1	1	1	97143.2	9.05	CAEEL	1			0	1	1	56500	0	A0A1X7RBL4	1.2	1	9.17	24	24.1
0	0	56500
0	1	0	1	1	29261.6	9.19	CAEEL	1			0	1	1	266000	0	O62427	1.9	1	9.16	25	25.1
0	266000	0
0	0	1	1	1	17180.2	7.84	CAEEL	1			0	1	1	116000	0	P91110	12.6	1	9.06	26	26.1
0	0	116000
1	1	1	3	3	55695.2	11.42	CAEEL	1			0	1	3	957000	0	Q09633	1.5	1	9.04	27	27.1
329000	330000	298000
0	1	0	1	1	48273.5	6.91	CAEEL	1			0	1	1	19600	0	P34454	1.9	1	9	28	28.1
0	19600	0
0	1	1	2	2	78385	9.23	CAEEL	1			0	1	2	91800	0	Q8MNV7	1.8	1	8.94	29	29.1
0	46700	45200
1	0	0	1	1	26738.2	8.71	CAEEL	1			0	1	1	43700	0	P90779	4.8	1	8.82	30	30.1
43700	0	0
0	0	1	1	1	64784.1	9.2	CAEEL	1			0	1	1	3940	0	Q9BHL0	3.1	1	8.78	31	31.1
0	0	3940
0	0	1	1	1	150936	8.44	CAEEL	1			0	1	1	23300	0	G5EDC2	0.5	1	8.77	32	32.1
0	0	23300
0	1	0	1	1	40498.1	6.48	CAEEL	1			0	1	1	42000	0	P34293	4.1	1	8.68	33	33.1
0	42000	0
0	0	1	1	1	61967	9.57	CAEEL	1			0	1	1	18300	0	Q95Y89	4.3	1	8.65	34	34.1
0	0	18300
1	0	0	1	1	164186	5.9	CAEEL	1			0	1	1	19800	0	P90757	0.6	1	8.62	35	35.1
19800	0	0
0	1	0	1	1	36146.5	8.94	CAEEL	1			0	1	1	93100	0	G8JYA7	2.5	1	8.55	36	36.1
0	93100	0
0	1	0	1	1	120964	5.11	CAEEL	1			0	1	1	19400	0	G5ECQ3	1.2	1	8.28	37	37.1
0	19400	0
2	0	0	1	2	164552	6.25	CAEEL	1			0	2	2	30100	0	A0A1I6CMB8	1.8	2	8.21	38	38.1
30100	0	0
1	0	1	2	2	93205.6	5.39	CAEEL	1			0	1	2	18300	0	O45373	1	1	7.88	39	39.1
11500	0	6820
0	0	1	1	1	33460.4	10.05	CAEEL	1			0	1	1	8150	0	Q5CZ33	2.1	1	7.87	40	40.1
0	0	8150
1	0	0	1	1	63013.4	4.16	CAEEL	1			0	1	1	2700	0	O17687	1.2	1	7.85	41	41.1
2700	0	0
0	0	1	1	1	23107.8	10.93	CAEEL	1			0	1	1	710	0	Q27389	3.4	1	7.81	42	42.1
0	0	710
0	1	0	1	1	21464.7	9.74	CAEEL	1			0	1	1	1480	0	Q21092	9.6	1	7.79	43	43.1
0	1480	0
1	0	0	1	1	85072.4	8.52	CAEEL	1			0	1	1	46400	0	G5EEA7	1.7	1	7.68	44	44.1
46400	0	0
2	0	0	1	2	40893.3	8.99	CAEEL	1			0	1	2	825000	0	O44150	1.6	1	7.39	45	45.1
825000	0	0
0	1	0	1	1	19628	5.38	CAEEL	1			0	1	1	17700	0	A0A0K3ARH7	5.7	1	7.35	46	46.1
0	17700	0
0	0	1	1	1	15255.2	7.03	CAEEL	1			0	1	1	15500	0	Q9TXQ6	11.4	1	7.28	47	47.1
0	0	15500
0	0	1	1	1	14446.1	9.1	CAEEL	1			0	1	1	5980	0	Q94045	12	1	7.25	48	48.1
0	0	5980
1	0	0	1	1	24665	6.33	CAEEL	1			0	1	1	3550	0	Q19660	3	1	7.07	49	49.1
3550	0	0
0	2	0	1	2	42523.7	10.31	CAEEL	1			0	1	2	66000	0	Q7YXB5	3.9	1	7.05	50	50.1
0	66000	0
1	1	1	3	3	23074.6	9.51	CAEEL	1			0	1	3	23500	0	D2YW13	6.7	1	7	51	51.1
8820	2660	12000
1	0	0	1	1	11421.3	10.29	CAEEL	1			0	1	1	19800	0	Q9U374	9.4	1	6.85	52	52.1
19800	0	0
0	0	1	1	1	31114.9	5.62	CAEEL	1			0	1	1	1560	0	P83351	6.1	1	6.81	53	53.1
0	0	1560
1	0	0	1	1	74979.6	7.85	CAEEL	1			0	1	1	69000	0	A5Z2V0	1.3	1	6.63	54	54.1
69000	0	0
0	1	0	1	1	51635.7	7.99	CAEEL	1			0	1	1	2760	0	A7UQ11	1.7	1	6.62	55	55.1
0	2760	0
0	1	0	1	1	12029.7	10.56	CAEEL	1			0	1	1	57100	0	Q09558	7.9	1	6.61	56	56.1
0	57100	0
0	0	1	1	1	57477.6	9.61	CAEEL	1			0	1	1	298000	0	Q95VX5	1.6	1	6.57	57	57.1
0	0	298000
0	1	0	1	1	92298.3	5.15	CAEEL	1			0	1	1	2660	0	Q21854	1.5	1	6.56	58	58.1
0	2660	0
0	0	1	1	1	48992.9	8.75	CAEEL	1			0	1	1	5900	0	O16723	4.1	1	6.43	59	59.1
0	0	5900
1	0	0	1	1	182575	8.95	CAEEL	1			0	1	1	69000	0	Q9U263	0.6	1	6.42	60	60.1
69000	0	0
0	1	0	1	1	36104.4	9.18	CAEEL	1			0	1	1	15200	0	P90991	3.3	1	6.33	61	61.1
0	15200	0
0	1	0	1	1	22346	5.26	CAEEL	1			0	1	1	1620	0	A0A2I2LDX7	6.3	1	6.31	62	62.1
0	1620	0
0	1	0	1	1	48052.4	8.83	CAEEL	1			0	1	1	103000	0	Q22710	3.3	1	6.31	63	63.1
0	103000	0
1	0	0	1	1	13532.4	6.64	CAEEL	1			0	1	2	0	0	Q09506	15.3	1	6.27	64	64.1
57100	0	0
1	0	1	2	2	34526.6	9.9	CAEEL	1			0	1	2	2580	0	G5EFU2	2.5	1	6.26	65	65.1
1810	0	764
0	0	1	1	1	84656.8	8.97	CAEEL	1			0	1	1	10600	0	A0A0K3ARE1	1.8	1	6.09	66	66.1
0	0	10600
0	2	0	1	2	55502.8	6.31	CAEEL	1			0	1	2	215000	0	Q09989	1.6	1	6.07	67	67.1
0	215000	0
1	0	0	1	1	25441.8	10.96	CAEEL	1			0	1	1	29500	0	A0A078BPN3	4.1	1	6.05	68	68.1
29500	0	0
0	0	1	1	1	20595.3	9.56	CAEEL	1			0	1	1	11400	0	Q27GV2	6.9	1	6.05	69	69.1
0	0	11400
1	0	0	1	1	38263.4	8.86	CAEEL	1			0	1	1	4590	0	B6EU60	1.8	1	5.99	70	70.1
4590	0	0
1	1	1	3	3	94171.3	6.19	CAEEL	1			0	1	3	187000	0	O17744	2.4	1	5.96	71	71.1
57100	61700	68400
0	1	0	1	1	21945.5	10.12	CAEEL	1			0	1	1	8080	0	P34264	6.6	1	5.86	72	72.1
0	8080	0
0	0	1	1	1	36212.6	8.58	CAEEL	1			0	1	1	2160	0	H2KY79	6	1	5.79	73	73.1
0	0	2160
0	0	1	1	1	64769.2	8.32	CAEEL	1			0	1	1	109000	0	Q9N4M3	1.2	1	5.66	74	74.1
0	0	109000
0	1	0	1	1	48062.5	5.31	CAEEL	1			0	1	1	14400	0	Q17431	4.8	1	5.63	75	75.1
0	14400	0
0	0	1	1	1	136188	9.04	CAEEL	1			0	1	1	15500	0	D7SFK4	1.5	1	5.62	76	76.1
0	0	15500
0	1	0	1	1	262877	5.02	CAEEL	1			0	1	1	58700	0	P34367	0.5	1	5.53	77	77.1
0	58700	0
2	0	1	2	3	37959.1	9.98	CAEEL	1			0	1	3	339000	0	F5GU62	2.1	1	5.52	78	78.1
232000	0	107000
1	0	0	1	1	62410.7	6.71	CAEEL	1			0	1	1	18700	0	Q95XJ7	1.8	1	5.49	79	79.1
18700	0	0
1	0	0	1	1	123571	4.61	CAEEL	1			0	1	1	28300	0	Q9N5V3	0.5	1	5.49	80	80.1
28300	0	0
0	0	1	1	1	53715.9	6.1	CAEEL	1			0	1	1	5660	0	O61715	2.6	1	5.48	81	81.1
0	0	5660
1	0	0	1	1	118000	5.31	CAEEL	1			0	1	1	2750	0	H2KZ73	0.8	1	5.46	82	82.1
2750	0	0
1	0	0	1	1	49192.3	6.05	CAEEL	1			0	1	1	2250	0	A0A3B1E9Z3	5.5	1	5.45	83	83.1
2250	0	0
0	0	1	1	1	51746.1	6.51	CAEEL	1			0	1	1	33100	0	Q9TZE1	1.7	1	5.37	84	84.1
0	0	33100
1	0	0	1	1	70512.1	5.41	CAEEL	1			0	1	1	1980	0	M1ZJY1	1.9	1	5.33	85	85.1
1980	0	0
1	0	0	1	1	37978.9	7.82	CAEEL	1			0	1	1	413000	0	H2KZ70	1.8	1	5.26	86	86.1
413000	0	0
0	1	0	1	1	231090	9.01	CAEEL	1			0	1	1	1650	0	O16237	0.6	1	5.22	87	87.1
0	1650	0
0	1	0	1	1	38552.4	6.41	CAEEL	1			0	1	1	5270	0	Q18122	2.6	1	5.19	88	88.1
0	5270	0
0	1	1	2	2	19593.1	9.56	CAEEL	1			0	1	4	5400	0	Q19165	8.2	1	5.13	89	89.1
0	6470	5400
0	1	0	1	1	63137.1	8.73	CAEEL	1			0	1	1	58700	0	Q21815	2.1	1	5.13	90	90.1
0	58700	0
0	1	0	1	1	117666	4.92	CAEEL	1			0	1	1	31700	0	G5EC21	1.3	1	5.08	91	91.1
0	31700	0
1	0	1	2	2	40403	7.83	CAEEL	1			0	1	2	8760	0	D3NQ95	1.9	1	5.03	92	92.1
3540	0	5230
0	0	1	1	1	47934.4	9.62	CAEEL	1			0	1	1	10000	0	O76562	2.4	1	5.01	93	93.1
0	0	10000
0	2	0	1	2	80126.6	8.61	CAEEL	1			0	1	2	206000	0	Q18563	2.1	1	4.98	94	94.1
0	206000	0
0	0	1	1	1	39964.2	9.58	CAEEL	1			0	1	1	11200	0	Q9U8C8	4.8	1	4.97	95	95.1
0	0	11200
0	0	1	1	1	123979	5.31	CAEEL	1			0	1	1	28500	0	E2JKY8	0.5	1	4.96	96	96.1
0	0	28500
0	0	1	1	1	11804.1	6.13	CAEEL	1			0	1	1	1130	0	H2L0S3	16.1	1	4.93	97	97.1
0	0	1130
1	0	0	1	1	29865.5	9.33	CAEEL	1			0	1	1	11300	0	Q23142	3.9	1	4.88	98	98.1
11300	0	0
1	0	0	1	1	11357	10.22	CAEEL	1			0	1	1	112000	0	Q9BLC2	7.5	1	4.86	99	99.1
112000	0	0
0	0	1	1	1	63699.3	8.56	CAEEL	1			0	1	1	75400	0	Q9GRV2	3.4	1	4.84	100	100.1
0	0	75400
1	0	0	1	1	46791.3	5.98	CAEEL	1			0	1	1	31100	0	Q18020	2.5	1	4.72	101	101.1
31100	0	0
0	1	0	1	1	92512.7	6.34	CAEEL	1			0	1	1	25700	0	Q9XXS6	0.8	1	4.67	102	102.1
0	25700	0
0	1	0	1	1	95989.7	5.29	CAEEL	1			0	1	1	9460	0	A0A163UTE6	1.6	1	4.58	103	103.1
0	9460	0
0	1	0	1	1	39088.7	9.8	CAEEL	1			0	1	1	1300	0	P92002	4.1	1	4.55	104	104.1
0	1300	0
1	0	0	1	1	35214.6	5.46	CAEEL	1			0	1	1	5350	0	Q10905	2.3	1	4.54	105	105.1
5350	0	0
0	1	0	1	1	84811	4.48	CAEEL	1			0	1	1	8380	0	O17838	1	1	4.5	106	106.1
0	8380	0
0	0	1	1	1	30920.5	9.06	CAEEL	1			0	1	1	3910	0	Q17892	3.3	1	4.47	107	107.1
0	0	3910
1	0	0	1	1	23077.7	9.43	CAEEL	1			0	1	1	6590	0	Q19830	6.9	1	4.43	108	108.1
6590	0	0
0	1	1	2	2	66960.1	7.85	CAEEL	1			0	1	2	15700	0	Q5FC36	1	1	4.41	109	109.1
0	7600	8150
0	0	1	1	1	24524.2	5.42	CAEEL	1			0	1	1	109000	0	O17594	6.3	1	4.37	110	110.1
0	0	109000
1	0	0	1	1	56225.2	4.84	CAEEL	1			0	1	1	11500	0	P34423	1.5	1	4.34	111	111.1
11500	0	0
0	1	0	1	1	388048	5.04	CAEEL	1			0	1	1	24400	0	A0A1N7SYN2	0.1	1	4.3	112	112.1
0	24400	0
1	0	0	1	1	64023.3	6.61	CAEEL	1			0	1	1	11200	0	O45074	2.5	1	4.29	113	113.1
11200	0	0
0	0	1	1	1	30976.8	5.31	CAEEL	1			0	1	1	3330	0	P91061	5.1	1	4.22	114	114.1
0	0	3330
0	0	1	1	1	52848.2	9.47	CAEEL	1			0	1	1	6820	0	Q09436	1.7	1	4.14	115	115.1
0	0	6820
1	0	0	1	1	308806	8.94	CAEEL	1			0	1	1	24400	0	Q95Q95	0.7	1	4.12	116	116.1
24400	0	0
0	0	1	1	1	9244.7	11.46	CAEEL	1			0	1	1	6430	0	Q7YWY8	14.2	1	4.1	117	117.1
0	0	6430
0	0	1	1	1	92355.2	6.3	CAEEL	1			0	1	1	1160	0	A0A0K3AQM0	1.6	1	4.09	118	118.1
0	0	1160
0	1	0	1	1	57751.2	7.89	CAEEL	1			0	1	1	118000	0	Q27487	1.2	1	4.06	119	119.1
0	118000	0
0	0	1	1	1	66342.8	8.79	CAEEL	1			0	1	1	784	0	O62090	1.7	1	4.05	120	120.1
0	0	784
0	0	1	1	1	44350.3	5.22	CAEEL	1			0	1	1	13900	0	G5EDW7	1.8	1	4	121	121.1
0	0	13900
0	1	0	1	1	42720.2	6.44	CAEEL	1			0	1	1	7960	0	O62034	3.5	1	3.96	122	122.1
0	7960	0
0	1	0	1	1	84914.4	9.61	CAEEL	1			0	1	1	14700	0	O01497	1.4	1	3.94	123	123.1
0	14700	0
1	0	0	1	1	130903	6.01	CAEEL	1			0	1	1	21000	0	Q21049	0.6	1	3.88	124	124.1
21000	0	0
0	1	0	1	1	138960	6.2	CAEEL	1			0	1	1	2210	0	Q9N4H7	0.4	1	3.88	125	125.1
0	2210	0
1	0	0	1	1	49074.9	9.19	CAEEL	1			0	1	1	21600	0	Q95XY8	3.7	1	3.87	126	126.1
21600	0	0
1	0	0	1	1	51221.1	9.13	CAEEL	1			0	1	1	15100	0	O17898	3.6	1	3.83	127	127.1
15100	0	0
1	0	0	1	1	60142.4	6.92	CAEEL	1			0	1	1	3540	0	B1Q250	1.3	1	3.69	128	128.1
3540	0	0
0	0	1	1	1	15216.1	9.15	CAEEL	1			0	1	1	109000	0	I2HA82	9.7	1	3.65	129	129.1
0	0	109000
1	0	0	1	1	108004	6.23	CAEEL	1			0	1	1	18700	0	Q4TT88	1.4	1	3.62	130	130.1
18700	0	0
0	0	1	1	1	1689639	5.01	CAEEL	1			0	1	1	6920	0	A0A2I2LDV7	0	1	3.61	131	131.1
0	0	6920
1	0	0	1	1	54501	8.86	CAEEL	1			0	1	1	52300	0	Q20085	1.9	1	3.59	132	132.1
52300	0	0
0	1	0	1	1	38963.6	9.84	CAEEL	1			0	1	1	21600	0	Q21263	1.4	1	3.54	133	133.1
0	21600	0
1	0	0	1	1	24883	9.13	CAEEL	1			0	1	1	3500	0	Q17958	5.5	1	3.53	134	134.1
3500	0	0
0	1	0	1	1	15642.7	6.84	CAEEL	1			0	1	1	18300	0	Q20107	5.7	1	3.51	135	135.1
0	18300	0
0	0	1	1	1	135124	6.74	CAEEL	1			0	1	1	9680	0	H2KY84	1	1	3.48	136	136.1
0	0	9680
0	0	1	1	1	21795.8	9.85	CAEEL	1			0	1	1	5230	0	Q17919	4.2	1	3.45	137	137.1
0	0	5230
1	0	0	1	1	36022.6	6.81	CAEEL	1			0	1	1	1240	0	Q19652	5.2	1	3.44	138	138.1
1240	0	0
0	0	1	1	1	25194.9	5.12	CAEEL	1			0	1	1	6940	0	E5QCE7	5	1	3.43	139	139.1
0	0	6940
1	0	0	1	1	9034.5	9.99	CAEEL	1			0	1	1	43800	0	G3MTY9	17.5	1	3.41	140	140.1
43800	0	0
1	0	0	1	1	20449.7	5.27	CAEEL	1			0	1	1	2070	0	Q18567	3.8	1	3.38	141	141.1
2070	0	0
0	0	1	1	1	68862.5	5.12	CAEEL	1			0	1	1	7670	0	Q22078	1.3	1	3.36	142	142.1
0	0	7670
1	0	0	1	1	67094.8	4.85	CAEEL	1			0	1	1	2450	0	G5ECD8	1.8	1	3.34	143	143.1
2450	0	0
0	0	1	1	1	24892.5	9.64	CAEEL	1			0	1	1	298000	0	Q9XU45	3.7	1	3.32	144	144.1
0	0	298000
1	0	0	1	1	252644	9.2	CAEEL	1			0	1	1	7620	0	Q20007	0.3	1	3.29	145	145.1
7620	0	0
0	1	0	1	1	124347	7.26	CAEEL	1			0	1	1	9780	0	G5EG74	1	1	3.28	146	146.1
0	9780	0
0	0	1	1	1	215547	9.33	CAEEL	1			0	1	1	7490	0	F0IWT2	0.6	1	3.24	147	147.1
0	0	7490
1	0	0	1	1	286129	6.73	CAEEL	1			0	1	1	7470	0	E9P860	0.6	1	3.23	148	148.1
7470	0	0
0	0	1	1	1	26976.5	9.76	CAEEL	1			0	1	1	3490	0	Q8T7Z2	3	1	3.18	149	149.1
0	0	3490
0	1	0	1	1	22635.2	6.42	CAEEL	1			0	1	1	15500	0	Q17984	7.3	1	3.15	150	150.1
0	15500	0
1	0	0	1	1	194162	6.98	CAEEL	1			0	1	1	1280	0	G5ECM4	0.6	1	3.14	151	151.1
1280	0	0
0	1	0	1	1	29947.4	9.74	CAEEL	1			0	1	1	321000	0	Q20293	3.3	1	3.08	152	152.1
0	321000	0
0	1	0	1	1	39028.5	9.33	CAEEL	1			0	1	1	20800	0	O44544	2.3	1	3.07	153	153.1
0	20800	0
0	1	0	1	1	75072.9	9.35	CAEEL	1			0	1	1	3720	0	Q21572	2.3	1	3.06	154	154.1
0	3720	0
0	0	1	1	1	17905.7	4.89	CAEEL	1			0	1	1	34200	0	Q22790	8.3	1	3.06	155	155.1
0	0	34200
0	0	1	1	1	31363.7	5.84	CAEEL	1			0	1	1	63400	0	G4SHR1	2.9	1	3.03	156	156.1
0	0	63400
1	0	0	1	1	253154	6.24	CAEEL	1			0	1	1	2430	0	G4RT15	0.4	1	3.02	157	157.1
2430	0	0
1	0	0	1	1	15747.8	9.3	CAEEL	1			0	1	1	8430	0	Q22903	10.8	1	3.01	158	158.1
8430	0	0
1	0	0	1	1	37534.3	9.39	CAEEL	1			0	1	1	1740	0	Q9XUV6	3.7	1	2.91	159	159.1
1740	0	0
0	1	0	1	1	51984.3	8.87	CAEEL	1			0	1	1	22300	0	Q10052	3.1	1	2.82	160	160.1
0	22300	0
1	0	0	1	1	39834.5	5.97	CAEEL	1			0	1	1	1560	0	O76655	4.1	1	2.75	161	161.1
1560	0	0
0	1	0	1	1	27087.4	7.97	CAEEL	1			0	1	1	66900	0	Q8MXS8	5.1	1	2.71	162	162.1
0	66900	0
1	0	0	1	1	36637.5	10.06	CAEEL	1			0	1	1	11100	0	O16492	2.8	1	2.67	163	163.1
11100	0	0
1	0	0	1	1	240205	5.08	CAEEL	1			0	1	1	11500	0	Q21281	0.3	1	2.65	164	164.1
11500	0	0
0	1	0	1	1	55374.1	6.87	CAEEL	1			0	1	1	5200	0	A0A131MB05	2.6	1	2.55	165	165.1
0	5200	0
0	0	1	1	1	251017	8.33	CAEEL	1			0	1	1	2050	0	G5EDC5	0.5	1	2.45	166	166.1
0	0	2050
0	1	0	1	1	61812.3	5.94	CAEEL	1			0	1	1	9050	0	Q19722	1.8	1	2.43	167	167.1
0	9050	0
0	1	0	1	1	80899.5	9.21	CAEEL	1			0	1	1	18300	0	G5EBX9	1.1	1	2.23	168	168.1
0	18300	0
1	0	0	1	1	31939.3	5.59	CAEEL	1			0	1	1	1660	0	G5ECU6	1.8	1	2.21	169	169.1
1660	0	0
0	0	1	1	1	59605.5	8.32	CAEEL	1			0	1	1	17500	0	Q09623	1.4	1	1.74	170	170.1
0	0	17500
0	1	0	1	1	40941	5.77	CAEEL	1			0	1	1	30100	0	Q8I4G2	2.8	1	1.44	171	171.1
0	30100	0
0	1	0	1	1	85898.4	5.4	CAEEL	1			0	1	1	2660	0	Q95Q40	1.7	1	1.33	172	172.1
0	2660	0
0	0	1	1	1	46457.4	9.96	CAEEL	1			0	1	1	3090	0	B3WFV2	3.2	1	1.15	173	173.1
0	0	3090
1	0	0	1	1	23748.9	9.76	CAEEL	1			0	1	1	12700	0	Q7YWV0	3.4	1	0.7	174	174.1
12700	0	0
0	1	0	1	1	41881.7	4.88	CAEEL	1			0	1	1	989	0	Q95XT8	3.9	1	0.54	175	175.1
0	989	0
