# Supplementary material for: Cronobacter sakazakii infection implicates multifaceted neuro-immune regulatory pathways of Caenorhabditis elegans
Source: Royal Society of Chemistry journal article supplement (doi:10.1039/d3mo00167a), 2023-09-28
Supplement: d3mo00167a3.xlsx [file d3mo00167a3.xlsx]

## Sheet: Protein Summary Details
Spectrum Mill - Protein Peptide/Summary
Results Shown Filtered by Validation Category: sequence-not-validated
Data Directory: msdataSM\CSAKAZAKII24HA - SpecFeatures read
Retrieving all hits from tagSummary file.
all hits read from tagSummary file num hits: 207
original hits subset determined from files: 88 Files: 88 Hits: 205
Data Directory: msdataSM\CSAKAZAKII24HB - SpecFeatures read
Retrieving all hits from tagSummary file.
all hits read from tagSummary file num hits: 149
original hits subset determined from files: 91 Files: 91 Hits: 146
Data Directory: msdataSM\CSAKAZAKII24HC - SpecFeatures read
Retrieving all hits from tagSummary file.
all hits read from tagSummary file num hits: 216
original hits subset determined from files: 107 Files: 107 Hits: 213
beginning to assemble proteins .... proteins assembled 0.019018 sec
proteins filtered by distinct peptides 0.007674 sec
proteins filtered by score
calculated protein coverage maps 0.129548 sec
beginning to roll up 375 proteins into groups ...
Sorted peptides by length to accelerate peptide roll up 0.005341 sec
completed primary peptide roll up 3915 sequence comparisons 0.067481 sec
completed post roll up subgrouping and sorting 0.004655 sec
Finished protein roll up into 207 groups 0.078651 sec
protein groups ready for display
proteinGroupingMethod: oneSharedPeptideSubgrouped Subgroups expanded 7.95e-002 sec
207 Protein Groups listed - Total Proteins: 367
Group	Subgroup	Spectra	Distinct	Distinct	% AA	Total	Protein MW	Protein	Species	Database	Protein Name
(#)	(#)	(#)	Peptides	Summed	Coverage	Protein	(Da)	pI		Accession #
			(#)	MS/MS Search		Spectral
				Score		Intensity
1	1.1	9	6	56.11	12.2	107000	42137.4	5.3	CAEEL	P0DM41	Actin-1
1	1.1	9	6	56.11	12.2	107000	42137.4	5.3	CAEEL	P0DM42	Actin-3
1	1.1	9	6	56.11	12.2	107000	42119.3	5.29	CAEEL	P10984	Actin-2
1	1.1	9	6	56.11	12.2	107000	42119.3	5.3	CAEEL	P10986	Actin-4
1	1.1	9	6	56.11	12.7	107000	40653.7	5.56	CAEEL	Q6A8K1	Actin-4
1	1.1	8	5	46.87	10.5	105000	37506.2	5.37	CAEEL	Q95ZL1	Actin-4
1	1.1	7	4	42.49	7.7	100000	42157.4	5.44	CAEEL	O45815	ACTin
2	2.1	12	4	28.63	8.2	80000	51123.9	9.35	CAEEL	P53013	Elongation factor 1-alpha
2	2.1	11	3	23.21	6	74800	47543.9	9.37	CAEEL	G8JY74	Elongation factor 1-alpha
2	2.1	1	1	5.42	4.4	5220	30083.3	9.36	CAEEL	Q86NF3	Elongation factor 1-alpha
3	3.1	4	1	15.54	1.2	1600000	53610.1	6.17	CAEEL	Q09400	Uncharacterized protein F58F12.3
4	4.1	3	1	13.55	1.8	46000	38009.2	8.8	CAEEL	V6CLB7	G Protein, Alpha subunit
4	4.1	3	1	13.55	1.8	46000	37733.9	8.52	CAEEL	V6CLF3	G Protein, Alpha subunit
5	5.1	3	1	13.02	1	358000	63688.4	5.62	CAEEL	Q9N4P3	Uncharacterized protein
6	6.1	2	1	12.7	7.9	120000	12029.7	10.56	CAEEL	Q09558	Uncharacterized protein
7	7.1	4	2	12.62	5	16400	33215.3	9.86	CAEEL	O45865	Adenine Nucleotide Translocator
7	7.1	3	1	7.93	2.8	13500	27025.1	9.81	CAEEL	G3MU69	Adenine Nucleotide Translocator
7	7.1	1	1	4.69	2.5	2900	34526.6	9.9	CAEEL	G5EFU2	Adenine Nucleotide Translocator
7	7.1	1	1	4.69	2.5	2900	34554.7	9.9	CAEEL	G5EFW8	Adenine Nucleotide Translocator
7	7.1	1	1	4.69	2.6	2900	33542.1	9.64	CAEEL	O01813	Adenine Nucleotide Translocator
8	8.1	2	2	12.53	11.7	6700	14454.6	10.88	CAEEL	J7S164	Histone H2A
8	8.1	2	2	12.53	10.8	6700	15764.2	10.62	CAEEL	J7SA65	Histone H2A
8	8.1	2	2	12.53	12.5	6700	13404.3	10.69	CAEEL	P09588	Histone H2A
8	8.1	2	2	12.53	12.5	6700	13418.4	10.69	CAEEL	Q27485	Histone H2A
8	8.1	1	1	6.7	6.4	1450	14668.8	10.6	CAEEL	Q27511	Histone H2A.V
9	9.1	3	2	12.46	1.5	150000	109608	4.37	CAEEL	Q09560	Uncharacterized protein F36G3.1
10	10.1	2	2	12.33	5.5	15700	40441.2	7.88	CAEEL	Q9XXS2	SET (Trithorax/polycomb) domain containing
11	11.1	2	1	11.83	2	11600	69685.1	6.48	CAEEL	H2L034	Peroxisomal Membrane Protein related
11	11.1	2	1	11.83	2.1	11600	65739.8	6.09	CAEEL	H2L035	Peroxisomal Membrane Protein related
12	12.1	2	2	11.61	0.7	14800	231090	9.01	CAEEL	O16237	LysM Domain (Peptidoglycan binding) protein
13	13.1	1	1	11.55	2	6790	95820.5	5.12	CAEEL	Q9NA64	Interleukin cytokine receptor-related protein 1
14	14.1	5	1	10.72	0.1	93600	461741	5.2	CAEEL	H2L075	KETtiN (Drosophila actin-binding) homolog
14	14.1	5	1	10.72	0.1	93600	474320	5.25	CAEEL	Q5PY59	KETtiN (Drosophila actin-binding) homolog
14	14.1	5	1	10.72	0.1	93600	469691	5.23	CAEEL	Q8MXD8	KETtiN (Drosophila actin-binding) homolog
14	14.1	5	1	10.72	0.1	93600	471245	5.32	CAEEL	Q9NL87	KETtiN (Drosophila actin-binding) homolog
14	14.1	5	1	10.72	0.1	93600	553088	5.47	CAEEL	V6CJB8	KETtiN (Drosophila actin-binding) homolog
14	14.1	5	1	10.72	0.1	93600	482938	5.27	CAEEL	V6CKH1	KETtiN (Drosophila actin-binding) homolog
14	14.1	5	1	10.72	0.1	93600	557717	5.48	CAEEL	V6CLP5	KETtiN (Drosophila actin-binding) homolog
14	14.1	5	1	10.72	0.1	93600	544469	5.45	CAEEL	V6CLT3	KETtiN (Drosophila actin-binding) homolog
14	14.1	5	1	10.72	0.1	93600	549098	5.46	CAEEL	V6CLU0	KETtiN (Drosophila actin-binding) homolog
14	14.1	5	1	10.72	0.1	93600	478309	5.26	CAEEL	V6CLU5	KETtiN (Drosophila actin-binding) homolog
15	15.1	1	1	10.56	6.3	1510	45012.8	7.83	CAEEL	G5EDP2	Non-specific lipid-transfer protein-like 2
16	16.1	2	1	10.42	11.6	6360	11426.2	11.36	CAEEL	P62784	Histone H4
17	17.1	1	1	10.02	2.7	8100	101585	9.22	CAEEL	Q8WQL7	Dual specificity tyrosine-phosphorylation-regulated kinase mbk-1
18	18.1	1	1	9.95	2.2	34700	61407.8	9.55	CAEEL	H2KYE7	Uncharacterized protein
18	18.1	1	1	9.95	1.5	34700	91049.1	8.95	CAEEL	Q3HKB7	Uncharacterized protein
19	19.1	1	1	9.84	1.2	18300	129634	8.78	CAEEL	B2MZB8	SLOwpoke potassium channel family
19	19.1	1	1	9.84	1.2	18300	130474	9.06	CAEEL	G5ECD1	Putative potassium channel Slo-2
19	19.1	1	1	9.84	1.2	18300	128931	8.92	CAEEL	G5EDJ1	SLO-2 potassium channel
19	19.1	1	1	9.84	1.2	18300	130673	8.32	CAEEL	H9G2R3	SLOwpoke potassium channel family
19	19.1	1	1	9.84	1.2	18300	132634	7.25	CAEEL	H9G2R4	SLOwpoke potassium channel family
19	19.1	1	1	9.84	1.2	18300	132468	8.47	CAEEL	H9G2R6	SLOwpoke potassium channel family
19	19.1	1	1	9.84	1.2	18300	131327	6.83	CAEEL	H9G2R7	SLOwpoke potassium channel family
19	19.1	1	1	9.84	1.2	18300	126319	8.92	CAEEL	Q565B7	SLOwpoke potassium channel family
20	20.1	1	1	9.81	2.1	9210	53281.6	9.38	CAEEL	Q8MYL9	Uncharacterized protein
21	21.1	2	2	9.71	1	637000	131610	9.31	CAEEL	Q20878	Uncharacterized protein
21	21.1	1	1	6.53	1.4	189000	40443.7	7.83	CAEEL	Q18649	Double-Strand Break factor
21	21.1	1	1	6.53	3.5	189000	16407.1	7.92	CAEEL	Q9N3I5	Uncharacterized protein
22	22.1	1	1	9.56	3.1	1920	40413.2	9.18	CAEEL	Q21600	Uncharacterized protein
23	23.1	1	1	9.56	1.9	16000	48532.3	6.71	CAEEL	Q9XVS8	Nuclear RNA export factor 2
24	24.1	4	1	9.38	2.7	230000	74997.9	8.26	CAEEL	O62139	Acyl-coenzyme A oxidase
25	25.1	4	1	9.37	1.5	1090000	55695.2	11.42	CAEEL	Q09633	RNase H
26	26.1	2	1	9.2	1.6	8730	55582.5	8.78	CAEEL	Q9NF64	Uncharacterized protein
27	27.1	3	1	9.13	4.5	161000	46776.7	7.82	CAEEL	H2L0B0	Nuclear Hormone Receptor family
27	27.1	3	1	9.13	4.9	161000	43296.9	8.76	CAEEL	Q86PJ5	Nuclear Hormone Receptor family
27	27.1	3	1	9.13	7.4	161000	28890.5	9.47	CAEEL	Q8MXE5	Nuclear Hormone Receptor family
27	27.1	3	1	9.13	5.5	161000	38365.1	6.21	CAEEL	S6FD08	Nuclear Hormone Receptor family
28	28.1	5	1	9.08	2.8	239000	36175.7	8.5	CAEEL	O62515	Probable phytanoyl-CoA dioxygenase
29	29.1	1	1	9.03	1.4	232000	83783.3	6.31	CAEEL	P34422	Dipeptidyl peptidase family member 6
30	30.1	2	1	8.97	5.4	14100	25532.8	9.64	CAEEL	Q9TY00	Uncharacterized protein
31	31.1	2	1	8.96	2.6	24700	47717.5	7.86	CAEEL	Q20169	Uncharacterized protein
31	31.1	2	1	8.96	2.6	24700	47958.8	7.86	CAEEL	Q86D11	Uncharacterized protein
32	32.1	1	1	8.89	2.6	632	53203.4	9.05	CAEEL	Q9U334	Uncharacterized protein
33	33.1	1	1	8.86	1.1	1170	159573	6.13	CAEEL	G5EDY1	Uncharacterized protein
33	33.1	1	1	8.86	1.1	1170	153206	6.09	CAEEL	G5EGQ8	Uncharacterized protein
34	34.1	1	1	8.82	12.1	22700	19315.3	6.8	CAEEL	E0AHC8	Uncharacterized protein
34	34.1	1	1	8.82	9.4	22700	24405.8	6.84	CAEEL	P90785	Uncharacterized protein
35	35.1	1	1	8.81	4.3	22600	61967	9.57	CAEEL	Q95Y89	Pescadillo homolog
36	36.1	3	1	8.61	2.2	265000	39478.2	6.48	CAEEL	G5EGG8	DNA repair protein RAD51 homolog
36	36.1	3	1	8.61	2.2	265000	40081.9	6.74	CAEEL	L8E822	DNA repair protein RAD51 homolog
36	36.1	3	1	8.61	2	265000	43966.3	7.18	CAEEL	Q95Q25	DNA repair protein RAD51 homolog
37	37.1	1	1	8.5	4	12600	67405.8	6.14	CAEEL	O61192	Uncharacterized protein
38	38.1	1	1	8.37	1.5	63900	62978.1	9.59	CAEEL	A0A0S4XR26	TeNSin homolog
38	38.1	1	1	8.37	0.6	63900	148335	8.98	CAEEL	A0A0S4XR31	TeNSin homolog
38	38.1	1	1	8.37	3.4	63900	28261.7	9.25	CAEEL	A0A0S4XR51	TeNSin homolog
38	38.1	1	1	8.37	2.8	63900	34848.9	9.69	CAEEL	A0A0S4XR69	TeNSin homolog
38	38.1	1	1	8.37	0.6	63900	152600	9.05	CAEEL	H2L045	TeNSin homolog
38	38.1	1	1	8.37	0.9	63900	106120	9.19	CAEEL	H2L046	TeNSin homolog
38	38.1	1	1	8.37	2.1	63900	45748.2	5.44	CAEEL	P92160	TeNSin homolog
39	39.1	1	1	8.23	2.7	25200	38618.7	9.65	CAEEL	P91475	Serpentine Receptor, class AB (Class A-like)
40	40.1	1	1	8.2	2.3	3650	54272.7	6.24	CAEEL	P52717	Uncharacterized serine carboxypeptidase F41C3.5
41	41.1	1	1	8.19	4.4	51500	47230.2	8.5	CAEEL	O01733	Uncharacterized protein
42	42.1	1	1	8.16	2.3	22700	104424	9	CAEEL	G5EEK3	Non-centrosomal microtubule array protein 1
43	43.1	1	1	8.11	1.1	19900	77960.4	9.04	CAEEL	Q22249	Uncharacterized protein
44	44.1	2	1	8.04	1	352000	55271.1	8.69	CAEEL	H2KZ09	Serpentine Receptor, class SX
44	44.1	2	1	8.04	1	352000	55303.8	5.75	CAEEL	O16626	Uncharacterized protein
44	44.1	2	1	8.04	1	352000	55214.2	9.59	CAEEL	Q9XTB5	LEM protein 2
45	45.1	1	1	8.01	16	122000	13459.3	9.22	CAEEL	O16542	Uncharacterized protein
46	46.1	1	1	7.96	1.7	13200	85072.4	8.52	CAEEL	G5EEA7	Anion transporter SULP-4
47	47.1	1	1	7.94	4.6	1170	35114	6.42	CAEEL	Q5FC21	Alkyl transferase
48	48.1	1	1	7.8	5.3	7030	47101.1	8.84	CAEEL	Q21039	COLlagen
49	49.1	1	1	7.77	3.8	8420	39284.3	8.41	CAEEL	O44517	Uncharacterized protein
49	49.1	1	1	7.77	3.8	8420	39559.6	8.41	CAEEL	U4PC34	Uncharacterized protein
50	50.1	1	1	7.74	2	36400	77300.5	7.79	CAEEL	Q20059	WD repeat-containing protein 48 homolog
51	51.1	1	1	7.69	0.5	35800	117809	6.43	CAEEL	O76571	Uncharacterized protein
52	52.1	1	1	7.66	3.2	67500	31791.1	9.38	CAEEL	G5EFI9	Checkpoint protein
53	53.1	1	1	7.66	1.6	95100	55502.8	6.31	CAEEL	Q09989	SynDaPiN (Synaptic dynamin binding protein) homolog
53	53.1	1	1	7.66	1.6	95100	56251.7	6.31	CAEEL	Q6AHQ8	SynDaPiN (Synaptic dynamin binding protein) homolog
54	54.1	1	1	7.64	4.6	61100	46529.3	8.77	CAEEL	Q19683	Uncharacterized protein F21D5.5
55	55.1	1	1	7.6	2.4	50400	94171.3	6.19	CAEEL	O17744	Uncharacterized protein
56	56.1	1	1	7.57	9.4	15800	11421.3	10.29	CAEEL	Q9U374	Uncharacterized protein
57	57.1	1	1	7.55	0.2	4160	470738	6.25	CAEEL	G5EEV2	Transcription-associated protein 1
58	58.1	1	1	7.54	1.9	252000	29261.6	9.19	CAEEL	O62427	Uncharacterized protein
58	58.1	1	1	7.54	0.9	252000	60893.5	5.15	CAEEL	Q22560	Importin subunit alpha-1
59	59.1	1	1	7.46	5.8	10600	25585.2	7.85	CAEEL	Q22459	C. Elegans Homeobox
60	60.1	1	1	7.44	2	6440	73900.3	5.78	CAEEL	Q93550	Solute carrier organic anion transporter family member
61	61.1	1	1	7.42	0.8	2080	117348	8.47	CAEEL	Q19204	A disintegrin and metalloproteinase with thrombospondin motifs adt-2
61	61.1	1	1	7.42	0.9	2080	111626	7.04	CAEEL	Q7Z291	A disintegrin and metalloproteinase with thrombospondin motifs adt-2
62	62.1	1	1	7.39	1.2	3740	55918	9.33	CAEEL	H2L0R7	Uncharacterized protein
62	62.1	1	1	7.39	8.4	3740	8602.5	9.84	CAEEL	P34451	Uncharacterized protein F54F2.6
62	62.1	1	1	7.39	1.2	3740	56272.5	9.37	CAEEL	Q95XG1	Uncharacterized protein
62	62.1	1	1	7.39	1.9	3740	36117.3	9.85	CAEEL	U4PC11	Uncharacterized protein
62	62.1	1	1	7.39	4.2	3740	16669.9	9.98	CAEEL	U4PCE7	Uncharacterized protein
63	63.1	1	1	7.34	0.2	6450	261793	6.3	CAEEL	G5EC55	Multiple PDZ domain protein
63	63.1	1	1	7.34	0.2	6450	259362	6.16	CAEEL	G5EC95	Multiple PDZ domain protein
63	63.1	1	1	7.34	0.2	6450	273315	6.52	CAEEL	G5ECZ8	Multiple PDZ domain protein
63	63.1	1	1	7.34	0.8	6450	92527.2	6.46	CAEEL	G5EDY4	Multiple PDZ domain protein
64	64.1	1	1	7.33	1.5	18200	38859.7	8.91	CAEEL	A9D7R4	Uncharacterized protein
64	64.1	1	1	7.33	4.4	18200	13674.4	9.49	CAEEL	O44878	Uncharacterized protein
64	64.1	1	1	7.33	0.5	18200	93542.5	6.24	CAEEL	Q21021	Nuclear Pore complex Protein
64	64.1	1	1	7.33	0.5	18200	96301.4	5.81	CAEEL	Q86G90	Nuclear Pore complex Protein
65	65.1	1	1	7.33	0.6	3510	128008	9.33	CAEEL	Q9BKX2	Uncharacterized protein
66	66.1	1	1	7.29	1.5	2270	96496.2	8.47	CAEEL	Q8MXV8	GLutamate Receptor family (AMPA)
67	67.1	1	1	7.28	1.4	17500	71827.1	6.18	CAEEL	O45402	DEgenerin Linked to Mechanosensation
68	68.1	5	1	7.25	15.3	103000	13532.4	6.64	CAEEL	Q09506	Uncharacterized protein C45G9.7
69	69.1	1	1	7.24	10.3	9660	22680.7	5.81	CAEEL	Q17819	Probable oligoribonuclease
70	70.1	1	1	7.16	2	944	89189.6	5.07	CAEEL	P24612	Degenerin mec-4
71	71.1	1	1	7.11	2.7	927	40448.5	10.01	CAEEL	O62258	Uncharacterized protein
72	72.1	1	1	7.11	6.1	12200	25041.7	9.33	CAEEL	P91033	Uncharacterized protein
73	73.1	2	1	7.1	1.4	47900	108004	6.23	CAEEL	Q4TT88	Puromycin-sensitive aminopeptidase
74	74.1	2	1	7.1	2.2	19300	35646.7	9.43	CAEEL	Q7YXD2	Delta-like protein
75	75.1	1	1	7.09	4.5	14200	48165.4	8.89	CAEEL	Q95Y05	Nuclear Hormone Receptor family
75	75.1	1	1	7.09	4.5	14200	48095.3	8.89	CAEEL	U4PBS1	Nuclear Hormone Receptor family
75	75.1	1	1	7.09	5.9	14200	36793.7	7.92	CAEEL	U4PC44	Nuclear Hormone Receptor family
75	75.1	1	1	7.09	5.9	14200	36723.6	7.9	CAEEL	U4PEZ8	Nuclear Hormone Receptor family
76	76.1	1	1	7.06	2.8	1200	24653.2	10.22	CAEEL	I2HAF8	40S ribosomal protein S6
76	76.1	1	1	7.06	3.2	1200	21155.4	10.69	CAEEL	I2HAF9	40S ribosomal protein S6
76	76.1	1	1	7.06	2.4	1200	28249.4	10.34	CAEEL	Q9NEN6	40S ribosomal protein S6
77	77.1	1	1	6.89	0.5	21900	254702	9.02	CAEEL	A0A0K3AR10	Nucleosome-remodeling factor subunit NURF301-like
77	77.1	1	1	6.89	0.5	21900	241178	8.71	CAEEL	A0A0K3ARK1	Nucleosome-remodeling factor subunit NURF301-like
77	77.1	1	1	6.89	0.5	21900	240949	8.71	CAEEL	A0A0K3ATY3	Nucleosome-remodeling factor subunit NURF301-like
77	77.1	1	1	6.89	0.6	21900	186751	9.2	CAEEL	B6VQ92	Nucleosome-remodeling factor subunit NURF301-like
77	77.1	1	1	6.89	0.6	21900	186980	9.2	CAEEL	H2FLJ6	Nucleosome-remodeling factor subunit NURF301-like
77	77.1	1	1	6.89	0.5	21900	254473	9.02	CAEEL	Q6BER5	Nucleosome-remodeling factor subunit NURF301-like
78	78.1	2	1	6.88	7.7	25400	20816.7	6.16	CAEEL	A0A0K3ARZ8	Protein containing ALS2cr12 (ALS2CR12) signature
79	79.1	4	1	6.86	0.9	1040000	91269.8	9.37	CAEEL	O61794	SUn (SUN) domain Containing Ossification factor homolog
80	80.1	1	1	6.72	5.5	47300	24769.6	6.51	CAEEL	Q9XVJ3	Quinoid DihydroPteridine Reductase
81	81.1	1	1	6.65	5.1	122000	45624.6	9.51	CAEEL	Q8ITY6	Uncharacterized protein
82	82.1	1	1	6.63	6.9	9510	20595.3	9.56	CAEEL	Q27GV2	Uncharacterized protein ZK688.12
83	83.1	1	1	6.58	3.9	30700	42523.7	10.31	CAEEL	Q7YXB5	Uncharacterized protein
84	84.1	1	1	6.48	1.9	16000	48273.5	6.91	CAEEL	P34454	Uncharacterized protein F54F2.9
85	85.1	1	1	6.47	0.9	21900	149921	4.91	CAEEL	P34544	Histone-lysine N-methyltransferase met-2
86	86.1	1	1	6.35	1	18100	100486	4.58	CAEEL	A0A1I6CMA1	Uncharacterized protein
86	86.1	1	1	6.35	1.4	18100	70466	4.48	CAEEL	H2KZW6	Uncharacterized protein
86	86.1	1	1	6.35	1.6	18100	62885	4.34	CAEEL	O44561	Uncharacterized protein
87	87.1	1	1	6.27	0.6	1420	218796	6.52	CAEEL	K7ZUR1	Uncharacterized protein
88	88.1	1	1	6.22	1.3	3270	66865	9.84	CAEEL	Q9N534	Uncharacterized protein
89	89.1	1	1	6.13	1.8	403000	37978.9	7.82	CAEEL	H2KZ70	Uncharacterized protein
89	89.1	1	1	6.13	2.8	403000	24886.9	9.17	CAEEL	H2KZ71	Uncharacterized protein
89	89.1	1	1	6.13	1.8	403000	37321.2	8.51	CAEEL	Q5WRS7	Uncharacterized protein
90	90.1	1	1	6.11	4.8	10700	48062.5	5.31	CAEEL	Q17431	RNA polymerase-associated protein LEO1
91	91.1	1	1	6.11	3.7	10600	46443.1	5.79	CAEEL	Q18680	Inorganic pyrophosphatase 1
92	92.1	1	1	6.01	2.7	7870	28905.6	4.86	CAEEL	A0A0K3AWR8	Uncharacterized protein
92	92.1	1	1	6.01	2.4	7870	31998	5.03	CAEEL	O16657	Uncharacterized protein
93	93.1	1	1	6.01	2.7	55700	47395.6	5.89	CAEEL	Q22419	Uncharacterized protein
94	94.1	1	1	5.98	2.3	7350	94579	7.48	CAEEL	O01978	Uncharacterized protein
95	95.1	1	1	5.93	2	1180	53939.5	4.21	CAEEL	P49595	Probable protein phosphatase 2C F42G9.1
95	95.1	1	1	5.93	2.1	1180	51735.2	4.19	CAEEL	Q8MNS3	Probable protein phosphatase 2C F42G9.1
96	96.1	1	1	5.93	1.8	36600	72898.9	8.89	CAEEL	Q03564	Uncharacterized protein B0464.6
97	97.1	1	1	5.92	0.8	35800	68881.6	6.11	CAEEL	G1K108	Amino acid Transporter GlycoProtein subunit
97	97.1	1	1	5.92	0.7	35800	73726	5.99	CAEEL	O45298	Amino acid Transporter GlycoProtein subunit
97	97.1	1	1	5.92	0.4	35800	119605	6.08	CAEEL	Q19546	Probable Werner syndrome ATP-dependent helicase homolog 1
97	97.1	1	1	5.92	1	35800	55306.6	10.5	CAEEL	Q23377	Uncharacterized protein
97	97.1	1	1	5.92	3.4	35800	16657.8	9.8	CAEEL	Q9U1P7	Uncharacterized protein
97	97.1	1	1	5.92	2.1	35800	25972.3	6.24	CAEEL	Q9U2F6	Related to yeast Vacuolar Protein Sorting factor
98	98.1	1	1	5.86	5.1	10600	30976.8	5.31	CAEEL	P91061	Uncharacterized protein
99	99.1	1	1	5.83	1.8	4680	86886	9.57	CAEEL	Q21026	Uncharacterized protein
100	100.1	1	1	5.83	3	9450	49490	6.02	CAEEL	Q21037	Origin recognition complex subunit 2
101	101.1	1	1	5.78	2.7	2130	57696.9	5.52	CAEEL	P46561	ATP synthase subunit beta, mitochondrial
102	102.1	1	1	5.76	2.1	99900	37959.1	9.98	CAEEL	F5GU62	Uncharacterized protein
103	103.1	1	1	5.76	1.4	6220	78094	7.74	CAEEL	Q86NJ9	RNA Binding Motif protein homolog
103	103.1	1	1	5.76	1.1	6220	94949.9	9.75	CAEEL	Q86NK0	RNA Binding Motif protein homolog
103	103.1	1	1	5.76	1.1	6220	98161.5	9.74	CAEEL	Q8T8N7	RNA Binding Motif protein homolog
103	103.1	1	1	5.76	1	6220	105153	9.55	CAEEL	Q9BIC2	RNA Binding Motif protein homolog
103	103.1	1	1	5.76	1	6220	105025	9.55	CAEEL	Q9GYS7	RNA Binding Motif protein homolog
104	104.1	2	1	5.76	1.8	45200	78385	9.23	CAEEL	Q8MNV7	SWI/SNF-related matrix-associated actin-dependent regulator of chromatin subfamily A-like protein 1 homolog
105	105.1	1	1	5.76	0.9	25200	110130	8.96	CAEEL	Q95YF1	Uncharacterized protein
106	106.1	1	1	5.69	4.5	1930	28601.3	9.81	CAEEL	C7IVR7	Uncharacterized protein
106	106.1	1	1	5.69	12.6	1930	10784.6	11.51	CAEEL	O76669	Uncharacterized protein
107	107.1	1	1	5.68	2.8	3650	30816.4	5.49	CAEEL	P46769	40S ribosomal protein SA
108	108.1	1	1	5.66	4.7	18100	29277.8	9.15	CAEEL	Q9N4C7	Uncharacterized protein
109	109.1	1	1	5.56	1.1	11900	95039.4	9.07	CAEEL	Q23141	TRP-channel-Like
110	110.1	1	1	5.56	2.7	26100	59968.5	9.35	CAEEL	Q93834	Glycosyltransferase family 92 protein F59C6.8
111	111.1	1	1	5.56	3.4	27300	61886.5	6.33	CAEEL	Q9BIB7	HnRNP F homolog
112	112.1	1	1	5.55	1.2	8450	81594.8	6.04	CAEEL	Q22145	High Incidence of Males (Increased X chromosome loss)
113	113.1	1	1	5.52	0.9	1600	152209	4.71	CAEEL	D0Z5P0	Suppressor of gpa-3QL dye-filling defect
114	114.1	1	1	5.48	4	1830	19640.2	9.49	CAEEL	O61822	F-box A protein
115	115.1	1	1	5.43	0.6	4530	204526	6.34	CAEEL	G5EEV7	Uncharacterized protein
115	115.1	1	1	5.43	0.6	4530	203857	6.38	CAEEL	G5EF88	Uncharacterized protein
115	115.1	1	1	5.43	0.6	4530	206562	6.62	CAEEL	Q68TI8	DAF-15
115	115.1	1	1	5.43	0.6	4530	204263	6.42	CAEEL	S6F588	Uncharacterized protein
115	115.1	1	1	5.43	0.6	4530	204932	6.38	CAEEL	S6FD39	Uncharacterized protein
116	116.1	2	1	5.38	1.4	4480	71024.6	5.48	CAEEL	Q21374	Uncharacterized protein
117	117.1	1	1	5.35	7.6	1730	13591.5	11.82	CAEEL	O45499	40S ribosomal protein S26
118	118.1	1	1	5.35	0.6	10200	307594	5.32	CAEEL	Q5F4W0	CaDHerin family
119	119.1	2	1	5.31	3.9	17500	29865.5	9.33	CAEEL	Q23142	Uncharacterized protein
120	120.1	1	1	5.3	4.2	1370	32336.3	9.86	CAEEL	A0A3P6MYB5	STOmatin
120	120.1	1	1	5.3	3.9	1370	34676.1	9.95	CAEEL	A0A3P6N6M6	STOmatin
120	120.1	1	1	5.3	3.6	1370	37565.3	10.26	CAEEL	H2L024	STOmatin
120	120.1	1	1	5.3	3.1	1370	43300.5	9.92	CAEEL	Q7YZV6	STOmatin
120	120.1	1	1	5.3	3.9	1370	34244.5	9.66	CAEEL	Q7YZV7	STOmatin
121	121.1	1	1	5.26	1.9	2940	52967.9	6.45	CAEEL	Q09579	Uncharacterized protein
122	122.1	1	1	5.25	0.8	92000	96601	5.38	CAEEL	A5Z2T6	Uncharacterized protein
123	123.1	1	1	5.22	1.5	11000	136188	9.04	CAEEL	D7SFK4	Lin-12 and Glp-1 X-hybridizing
123	123.1	1	1	5.22	1	11000	210435	9.17	CAEEL	H2KZ94	Lin-12 and Glp-1 X-hybridizing
124	124.1	1	1	5.11	1.8	20600	67170.3	8.57	CAEEL	Q9U2C4	Probable N-acetylgalactosaminyltransferase 9
125	125.1	1	1	5.08	0.4	68500	164445	7.19	CAEEL	G5EDU3	Phospholipase
126	126.1	1	1	5.08	5.4	120000	40860	5.86	CAEEL	Q17930	Uncharacterized protein
127	127.1	1	1	5.05	1.8	4720	83901.3	5.91	CAEEL	O01514	Protein pthb1 homolog
128	128.1	1	1	5.05	1.7	1350	46291.1	8.47	CAEEL	Q7JP68	cAMP-dependent protein kinase, catalytic subunit-like
129	129.1	1	1	5.02	3.4	11900	32418.1	9.5	CAEEL	G5EDV3	C. Elegans Y-box
130	130.1	1	1	4.97	3	2420	50987	9.04	CAEEL	G5ECJ3	Uncharacterized protein
130	130.1	1	1	4.97	3	2420	50691.3	8.66	CAEEL	G5ED61	Uncharacterized protein
130	130.1	1	1	4.97	3.4	2420	44436.3	7.81	CAEEL	G5EDY9	Uncharacterized protein
130	130.1	1	1	4.97	3.6	2420	41629.2	8.45	CAEEL	G5EFN3	Uncharacterized protein
131	131.1	1	1	4.93	2.8	1350	23809.2	11.19	CAEEL	P91128	60S ribosomal protein L13
132	132.1	1	1	4.89	2.7	44900	54323	9.43	CAEEL	Q11179	Mitogen-activated protein kinase 15
133	133.1	1	1	4.87	3.8	7710	37131.9	9.04	CAEEL	Q19584	Ubiquitin fusion degradation protein 1 homolog
133	133.1	1	1	4.87	3.8	7710	36748.5	9.31	CAEEL	Q9U3I6	Ubiquitin fusion degradation protein 1 homolog
134	134.1	1	1	4.84	3.9	1800	27427.8	6.67	CAEEL	Q7YWY4	Uncharacterized protein
135	135.1	1	1	4.79	2	89600	37952.6	6.39	CAEEL	Q22031	Putative tRNA (cytidine(32)/guanosine(34)-2'-O)-methyltransferase
136	136.1	1	1	4.78	3	2550	34895.5	6.4	CAEEL	P91530	Uncharacterized protein
137	137.1	1	1	4.75	3.3	1340	52977.6	5.23	CAEEL	O18000	Patterned Expression Site
138	138.1	1	1	4.72	2.6	4270	53399.6	5.44	CAEEL	K8ESD4	Worm AIF (Apoptosis inducing factor) Homolog
138	138.1	1	1	4.72	1.8	4270	77356.6	5.51	CAEEL	Q8HJ11	Oxidoreductase WAH-1
138	138.1	1	1	4.72	3.9	4270	36438.8	5.57	CAEEL	Q9N5V9	Uncharacterized protein C51G7.5
138	138.1	1	1	4.72	1.8	4270	77735.2	5.75	CAEEL	Q9U229	Worm AIF (Apoptosis inducing factor) Homolog
139	139.1	1	1	4.66	3.2	966	24703.1	9.55	CAEEL	O17040	Very-long-chain (3R)-3-hydroxyacyl-CoA dehydratase hpo-8
140	140.1	1	1	4.61	0.9	110000	147805	9.05	CAEEL	G5EG61	p-GlycoProtein related
141	141.1	1	1	4.6	2	784	65819.9	6.62	CAEEL	Q23535	SoLute Carrier Family
142	142.1	1	1	4.58	0.8	44900	159112	5.72	CAEEL	Q93520	Uncharacterized protein
143	143.1	1	1	4.53	12.5	18100	11770.5	6.11	CAEEL	Q8MPX7	SaPosin-like Protein family
144	144.1	1	1	4.46	3.4	90400	22539.5	6.78	CAEEL	Q9TXI3	Doa4-Independent Degradation, homologous to yeast Did2
145	145.1	1	1	4.45	5.2	1360	35703.1	8.85	CAEEL	M1ZJS7	COLlagen
145	145.1	1	1	4.45	5.1	1360	36106.5	8.85	CAEEL	Q18450	COLlagen
146	146.1	1	1	4.44	6.3	2960	20749.8	9.7	CAEEL	A0A0K3ARL4	Uncharacterized protein
146	146.1	1	1	4.44	3	2960	43799.7	8.87	CAEEL	O62265	Uncharacterized protein
146	146.1	1	1	4.44	3.7	2960	35636.4	8.51	CAEEL	U4PAQ6	Uncharacterized protein
147	147.1	1	1	4.32	2.2	3350	29296.6	9.74	CAEEL	Q18934	SLC (SoLute Carrier) homolog
148	148.1	1	1	4.3	1.3	26300	60142.4	6.92	CAEEL	B1Q250	UDP-glucuronosyltransferase
148	148.1	1	1	4.3	1.3	26300	60241.6	6.92	CAEEL	H2KYQ0	UDP-glucuronosyltransferase
149	149.1	1	1	4.28	2.1	110000	80126.6	8.61	CAEEL	Q18563	Regulator of G-protein signaling rgs-6
150	150.1	1	1	4.27	2.1	7910	43876	9.89	CAEEL	Q7YTI1	Uncharacterized protein
151	151.1	1	1	4.23	1.7	401000	39660.4	4.67	CAEEL	G5EF11	E2F-like (Mammalian transcription factor)
152	152.1	1	1	4.17	0.5	1490	138396	9.37	CAEEL	A0A1N7SYS6	Transmembrane channel-like protein 2
152	152.1	1	1	4.17	0.7	1490	105497	9.14	CAEEL	A0A1N7SYT6	Transmembrane channel-like protein 2
152	152.1	1	1	4.17	0.7	1490	103237	9.16	CAEEL	A0A1N7SZ06	Transmembrane channel-like protein 2
153	153.1	1	1	4.16	3.6	18300	41899	9.26	CAEEL	Q95Y07	Nuclear Hormone Receptor family
153	153.1	1	1	4.16	3.8	18300	42839.1	9.43	CAEEL	Q9GTC6	Nuclear receptor NHR-92 (Fragment)
154	154.1	1	1	4.15	2.8	5590	48867.2	9.7	CAEEL	Q22518	Uncharacterized protein
155	155.1	1	1	4.14	3.3	2820	24266.8	9.08	CAEEL	Q17798	Uncharacterized protein
156	156.1	1	1	4.14	0.9	21200	122869	5.62	CAEEL	Q18289	Uncharacterized protein
157	157.1	1	1	4.13	1.3	1730	131395	5.76	CAEEL	G4RXT9	Uncharacterized protein
157	157.1	1	1	4.13	1.1	1730	146037	6.14	CAEEL	Q400L7	Uncharacterized protein
157	157.1	1	1	4.13	1.5	1730	111653	5.9	CAEEL	Q7Z298	Uncharacterized protein
158	158.1	1	1	4.12	2.6	5180	39087.4	7.04	CAEEL	P91321	Uncharacterized protein
159	159.1	1	1	4.11	0.1	67500	559947	5.13	CAEEL	A0A1N7SYN7	Uncharacterized protein
159	159.1	1	1	4.11	0.1	67500	562067	5.1	CAEEL	A0A1N7SYN9	Uncharacterized protein
159	159.1	1	1	4.11	0.1	67500	573884	5.12	CAEEL	A0A1N7SYP3	Uncharacterized protein
159	159.1	1	1	4.11	0.1	67500	548130	5.1	CAEEL	A0A1N7SYR7	Uncharacterized protein
159	159.1	1	1	4.11	0.2	67500	504107	5.13	CAEEL	G5ECG5	Uncharacterized protein
159	159.1	1	1	4.11	0.2	67500	376006	5.6	CAEEL	G5ECG8	Uncharacterized protein
159	159.1	1	1	4.11	0.2	67500	388645	5.56	CAEEL	G5ECP9	Uncharacterized protein
159	159.1	1	1	4.11	0.1	67500	564604	5.1	CAEEL	G5EDD3	Uncharacterized protein
159	159.1	1	1	4.11	0.2	67500	389944	5.57	CAEEL	G5EEC4	VAB-10A protein
159	159.1	1	1	4.11	0.6	67500	172918	5.52	CAEEL	G5EFD1	Uncharacterized protein
159	159.1	1	1	4.11	0.2	67500	375303	5.52	CAEEL	G5EFK7	Uncharacterized protein
159	159.1	1	1	4.11	0.1	67500	563365	5.1	CAEEL	G5EFM4	VAB-10B protein
159	159.1	1	1	4.11	0.2	67500	386441	5.56	CAEEL	G5EFW2	Uncharacterized protein
159	159.1	1	1	4.11	0.2	67500	401944	4.93	CAEEL	Q86NF7	VAB-10B protein
159	159.1	1	1	4.11	0.2	67500	389934	5.57	CAEEL	Q86NF8	VAB-10A protein
159	159.1	1	1	4.11	0.2	67500	390016	5.56	CAEEL	Q86NF9	VAB-10A protein
160	160.1	1	1	4.11	2.4	18300	64906.7	6.92	CAEEL	Q95QR2	Nuclear Hormone Receptor family
160	160.1	1	1	4.11	2.6	18300	60148.5	7.24	CAEEL	V6CJ10	Nuclear Hormone Receptor family
161	161.1	1	1	4.06	0.9	6600	92875.8	9.44	CAEEL	Q19046	ATP-dependent DNA helicase
162	162.1	1	1	4.06	4.3	4940	52934.4	9.24	CAEEL	Q23675	CHItinase-Like
163	163.1	1	1	4.03	1.3	3360	93100.3	5.76	CAEEL	G5ED52	NEPrilysin metallopeptidase family
163	163.1	1	1	4.03	1.4	3360	88956.7	5.72	CAEEL	G5EDC4	NEPrilysin metallopeptidase family
164	164.1	1	1	4.01	2.5	2930	39445	4.8	CAEEL	H2KZL8	5'-nucleotidase
164	164.1	1	1	4.01	2.3	2930	42430.6	5.21	CAEEL	Q09315	Putative cytosolic 5'-nucleotidase 3
165	165.1	1	1	3.91	2.5	28700	46791.3	5.98	CAEEL	Q18020	Heme Responsive protein
166	166.1	1	1	3.91	2	1130	78744.2	8.92	CAEEL	Q19585	WHiTe (Drosophila) related ABC transporter
167	167.1	1	1	3.89	5	49500	38819.3	9.54	CAEEL	Q9GS11	Seven TM Receptor
168	168.1	1	1	3.88	2.4	2930	39447	9.91	CAEEL	Q9XV83	Serpentine Receptor, class Z
169	169.1	2	1	3.86	0.3	13600	431424	6.89	CAEEL	A0A078BQN0	Uncharacterized protein
169	169.1	2	1	3.86	0.3	13600	432426	6.89	CAEEL	A0A078BTN1	Uncharacterized protein
170	170.1	1	1	3.85	3.4	9760	32102.7	6.84	CAEEL	Q20742	Uncharacterized protein
171	171.1	1	1	3.82	4.6	1160	17316.1	10.71	CAEEL	P51404	40S ribosomal protein S13
172	172.1	1	1	3.78	0.6	6560	106396	6.18	CAEEL	G5EBX0	Kinesin-like protein
172	172.1	1	1	3.78	0.8	6560	77948.5	7.03	CAEEL	G5EE85	Kinesin like protein
172	172.1	1	1	3.78	0.6	6560	106178	6.19	CAEEL	Q9G6S4	Kinesin like protein KLP-18 (Fragment)
173	173.1	1	1	3.59	1.4	3320	73889.7	5.74	CAEEL	H2KZ08	Uncharacterized protein
174	174.1	1	1	3.58	0.9	109000	70195.4	6.18	CAEEL	P34329	Probable protein disulfide-isomerase A4
175	175.1	1	1	3.56	1.6	3650	95989.7	5.29	CAEEL	A0A163UTE6	Heavy chain, Unconventional Myosin
175	175.1	1	1	3.56	1.6	3650	96265	5.29	CAEEL	A0A168H541	Heavy chain, Unconventional Myosin
175	175.1	1	1	3.56	1.7	3650	91650.8	5.42	CAEEL	A0A168H5A5	Heavy chain, Unconventional Myosin
175	175.1	1	1	3.56	1.7	3650	91375.5	5.42	CAEEL	A0A168H5E2	Heavy chain, Unconventional Myosin
175	175.1	1	1	3.56	1.7	3650	89685.6	5.45	CAEEL	A0A168H5H9	Heavy chain, Unconventional Myosin
175	175.1	1	1	3.56	0.7	3650	208622	8.61	CAEEL	G8JY81	Heavy chain, Unconventional Myosin
175	175.1	1	1	3.56	0.7	3650	212110	8.98	CAEEL	Q17383	Hum-2
175	175.1	1	1	3.56	0.7	3650	208347	8.61	CAEEL	Q95ZU1	Heavy chain, Unconventional Myosin
176	176.1	1	1	3.47	0.3	1940	259005	7.15	CAEEL	Q11107	Zinc finger protein lin-13
177	177.1	1	1	3.46	2.3	19400	33385.5	9.76	CAEEL	P49405	60S ribosomal protein L5
178	178.1	1	1	3.46	3.6	4100	29003.3	9.04	CAEEL	Q9N5U6	Uncharacterized protein
179	179.1	1	1	3.42	8.3	28200	17905.7	4.89	CAEEL	Q22790	Uncharacterized protein
180	180.1	1	1	3.38	7.8	1230	21455.2	4.29	CAEEL	P91226	Uncharacterized protein
181	181.1	1	1	3.33	2	29500	50875.8	6.78	CAEEL	Q23620	Uncharacterized protein
182	182.1	1	1	3.16	1.1	7590	104499	6.73	CAEEL	A0A131MCD3	RING finger protein nhl-1
182	182.1	1	1	3.16	1.1	7590	110448	7	CAEEL	Q03601	RING finger protein nhl-1
183	183.1	1	1	3.16	1.3	12000	83795.7	9.65	CAEEL	Q20538	Solute carrier organic anion transporter family member
184	184.1	1	1	3.13	2.7	1280	33463.3	9.64	CAEEL	C8JQQ7	Uncharacterized protein
184	184.1	1	1	3.13	2.2	1280	40125.8	10.03	CAEEL	P34564	Uncharacterized protein T16H12.1
185	185.1	1	1	3.1	1.9	37400	54501	8.86	CAEEL	Q20085	Membrane-associated tyrosine- and threonine-specific cdc2-inhibitory kinase wee-1.1
186	186.1	1	1	3.08	2.4	23600	28839.2	5.55	CAEEL	Q23450	Cytochrome c oxidase assembly factor 7 homolog
187	187.1	1	1	3.07	1.9	384000	42583.4	9.4	CAEEL	O61821	Uncharacterized protein
187	187.1	1	1	3.07	2.1	384000	38181.3	9.38	CAEEL	O62424	Uncharacterized protein
187	187.1	1	1	3.07	2	384000	38612.8	9.42	CAEEL	Q4U220	Uncharacterized protein
188	188.1	1	1	3	1.3	7960	76883.9	6.24	CAEEL	O01686	Oxysterol-binding protein
188	188.1	1	1	3	2.2	7960	45583.7	7.8	CAEEL	Q8I7N6	Oxysterol-binding protein
189	189.1	1	1	2.89	0.2	79300	308806	8.94	CAEEL	Q95Q95	Target of rapamycin homolog
190	190.1	1	1	2.81	1.3	5020	68225.4	6.29	CAEEL	Q9U3P9	ALKylated DNA repair protein AlkB homolog
191	191.1	1	1	2.77	0.9	27600	98083.7	5.4	CAEEL	A0A0K3AUK6	Receptor-type guanylate cyclase daf-11
191	191.1	1	1	2.77	0.7	27600	123062	5.11	CAEEL	Q8I4N4	Receptor-type guanylate cyclase daf-11
192	192.1	1	1	2.62	0.6	99900	121854	4.63	CAEEL	G5EC33	Uncharacterized protein
192	192.1	1	1	2.62	1.1	99900	73139	4.84	CAEEL	O16946	Uncharacterized protein
193	193.1	1	1	2.6	5.9	14900	15396.9	9.66	CAEEL	Q7YWN2	Uncharacterized protein
194	194.1	1	1	2.57	3.8	27300	53463.6	5.01	CAEEL	Q19101	Uncharacterized protein
194	194.1	1	1	2.57	2.1	27300	95307.3	4.87	CAEEL	S6EZL6	Uncharacterized protein
194	194.1	1	1	2.57	2	27300	102429	4.92	CAEEL	S6F527	Uncharacterized protein
194	194.1	1	1	2.57	2	27300	101990	4.92	CAEEL	S6FMY8	Uncharacterized protein
194	194.1	1	1	2.57	2.2	27300	91110.8	4.91	CAEEL	S6FWN8	Uncharacterized protein
195	195.1	1	1	2.52	1.2	4630	61614	5.46	CAEEL	O44400	Protein F37C4.5
196	196.1	1	1	2.39	1.2	2680	104287	6.75	CAEEL	P90897	DEAD-box ATP-dependent RNA helicase rde-12
197	197.1	1	1	2.39	14.4	7140	10458.7	6.09	CAEEL	Q22337	SaPosin-like Protein family
198	198.1	1	1	2.23	0.8	2010	90234.9	5.36	CAEEL	A3QM97	Metal transporter cnnm-1
199	199.1	1	1	2.17	0.5	32600	205083	5.16	CAEEL	O44565	LAMinin related. See also lmb
200	200.1	1	1	2.13	4.8	142000	22635.2	6.42	CAEEL	Q17984	Uncharacterized protein
201	201.1	1	1	1.27	2	28000	78239.1	7.2	CAEEL	Q22416	Uncharacterized protein
202	202.1	1	1	1.03	1.8	14900	48828.1	9.28	CAEEL	Q17817	Uncharacterized protein
203	203.1	1	1	0.81	0.7	1660	153879	5.42	CAEEL	Q19272	MutS protein homolog 5
204	204.1	1	1	0.77	1.4	30400	64573.3	8.62	CAEEL	P30642	Eukaryotic translation initiation factor 3 subunit D
205	205.1	1	1	0.64	1.1	31900	135533	5.78	CAEEL	A0A0S4XR43	CCAR1 homolog
205	205.1	1	1	0.64	2.7	31900	56113.1	10.59	CAEEL	G5EBS4	CCAR1 homolog
205	205.1	1	1	0.64	2.1	31900	73237.5	9.51	CAEEL	H2KMJ3	CCAR1 homolog
206	206.1	1	1	0.4	0.4	969	282547	5.29	CAEEL	G4S034	SPeCtrin
206	206.1	1	1	0.4	0.4	969	283094	5.28	CAEEL	Q21408	SPeCtrin
207	207.1	1	1	0.19	21.4	1640	7806.6	9.43	CAEEL	U4PS55	Uncharacterized protein
Totals:	554	413
Group	Subgroup	Spectra	Distinct	Distinct	% AA	Total	Protein MW	Protein	Species	Database	Protein Name
(#)	(#)	(#)	Peptides	Summed	Coverage	Protein	(Da)	pI		Accession #
			(#)	MS/MS Search		Spectral
				Score		Intensity
1	1.1	9	6	56.11	12.2	107000	42137.4	5.3	CAEEL	P0DM41
#	Filename	z	Score	Spectrum	Variable	Sequence	Sequence Map	Modifications	MH+	MH+	MH+
				Intensity	Sites			Map	Matched	Mass Shift	Error
									(Da)	(Da)	(ppm)
1	CSAKAZAKII24HA.2777.2777.2	2	14	8590		(K)IIAPPER(K)	(K)I/I|A/P P/E/R(K)		795.472	-0.0037	-4.6
2	CSAKAZAKII24HC.2743.2743.2	2	12.89	8920		(K)IIAPPER(K)	(K)I/I|A|P/P E/R(K)		795.472	-0.0028	-3.5
3	CSAKAZAKII24HC.3385.3385.2	2	10.56	4430		(K)EITALAPSTMK(I)	(K)E I|T/A/L|A P S/T M\K(I)		1161.62	-0.0058	-5
4	CSAKAZAKII24HA.2378.2383.2	2	10.17	1230		(K)ILTER(G)	(K)I/L|T/E/R(G)		631.377	-0.0035	-5.6
5	CSAKAZAKII24HA.2741.2741.3	3	9.24	1880		(R)HQGVMVGMGQK(D)	(R)H Q\G V\M|V|G M|G Q\K(D)		1171.57	-0.0023	-2
6	CSAKAZAKII24HA.2847.2847.2	2	9.08	28300		(R)LDLAGR(D)	(R)L/D|L/A/G/R(D)		644.373	-0.0017	-2.6
7	CSAKAZAKII24HB.2841.2851.2	2	8.96	22700		(R)LDLAGR(D)	(R)L/D|L|A/G R(D)		644.373	-0.0013	-2.1
8	CSAKAZAKII24HA.2851.2853.2	2	8.48	28300		(R)LDLAGR(D)	(R)L/D|L|A/G R(D)		644.373	-0.0017	-2.6
9	CSAKAZAKII24HC.2900.2900.2	2	3.06	2740		(K)CDIDIR(K)	(K)C/D|I/D/I/R(K)	C:Carbamidomethylation	791.372	-0.0027	-3.4
Group	Subgroup	Spectra	Distinct	Distinct	% AA	Total	Protein MW	Protein	Species	Database	Protein Name
(#)	(#)	(#)	Peptides	Summed	Coverage	Protein	(Da)	pI		Accession #
			(#)	MS/MS Search		Spectral
				Score		Intensity
2	2.1	12	4	28.63	8.2	80000	51123.9	9.35	CAEEL	P53013
#	Filename	z	Score	Spectrum	Variable	Sequence	Sequence Map	Modifications	MH+	MH+	MH+
				Intensity	Sites			Map	Matched	Mass Shift	Error
									(Da)	(Da)	(ppm)
1	CSAKAZAKII24HC.3323.3323.2	2	12.83	7930		(K)IGGIGTVPVGR(V)	(K)I G|G|I|G T|V/P V/G/R(V)		1025.61	-0.0027	-2.7
2	CSAKAZAKII24HA.3356.3356.2	2	12.64	8470		(K)IGGIGTVPVGR(V)	(K)I/G/G/I/G|T V/P V\G|R(V)		1025.61	-0.0015	-1.5
3	CSAKAZAKII24HA.3332.3332.2	2	12.02	8470		(K)IGGIGTVPVGR(V)	(K)I/G|G\I/G|T/V/P V\G R(V)		1025.61	-0.0015	-1.5
4	CSAKAZAKII24HC.3336.3336.2	2	10.08	7930		(K)IGGIGTVPVGR(V)	(K)I G|G|I/G/T/V/P V G R(V)		1025.61	-0.0027	-2.7
5	CSAKAZAKII24HB.3336.3336.2	2	9.42	5280		(K)IGGIGTVPVGR(V)	(K)I G|G\I|G/T|V|P V G R(V)		1025.61	-0.005	-4.8
6	CSAKAZAKII24HB.3327.3327.2	2	8.42	5280		(K)IGGIGTVPVGR(V)	(K)I/G|G I/G T|V/P V G R(V)		1025.61	-0.005	-4.8
7	CSAKAZAKII24HB.3348.3348.2	2	7.3	5280		(K)IGGIGTVPVGR(V)	(K)I/G|G\I|G T V/P V G R(V)		1025.61	-0.005	-4.8
8	CSAKAZAKII24HA.3342.3342.2	2	6.96	8470		(K)IGGIGTVPVGR(V)	(K)I/G/G\I|G/T/V/P V G R(V)		1025.61	-0.0015	-1.5
9	CSAKAZAKII24HB.3142.3142.2	2	6.85	1350		(R)QTVAVGVIK(S)	(R)Q T/V/A/V/G V/I/K(S)		914.567	-0.0048	-5.2
10	CSAKAZAKII24HC.3564.3564.3	3	5.42	5220		(R)EHALLAQTLGVK(Q)	(R)E H A L L\A/Q/T L/G\V/K(Q)		1279.74	0.0037	2.9
11	CSAKAZAKII24HA.3139.3139.2	2	5.22	1420		(R)QTVAVGVIK(S)	(R)Q T/V/A/V/G V I\K(S)		914.567	-0.006	-6.6
12	CSAKAZAKII24HC.3019.3019.2	2	3.53	14900		(K)GWAVER(K)	(K)G W|A/V E/R(K)		717.368	-0.003	-4.2
Group	Subgroup	Spectra	Distinct	Distinct	% AA	Total	Protein MW	Protein	Species	Database	Protein Name
(#)	(#)	(#)	Peptides	Summed	Coverage	Protein	(Da)	pI		Accession #
			(#)	MS/MS Search		Spectral
				Score		Intensity
3	3.1	4	1	15.54	1.2	1600000	53610.1	6.17	CAEEL	Q09400
#	Filename	z	Score	Spectrum	Variable	Sequence	Sequence Map	Modifications	MH+	MH+	MH+
				Intensity	Sites			Map	Matched	Mass Shift	Error
									(Da)	(Da)	(ppm)
1	CSAKAZAKII24HC.2406.2483.2	2	15.54	401000		(K)SGLLNR(F)	(K)S/G|L|L N|R(F)		659.384	-0.0004	-0.6
2	CSAKAZAKII24HB.2418.2484.2	2	14.64	403000		(K)SGLLNR(F)	(K)S/G|L|L N/R(F)		659.384	-0.0006	-0.9
3	CSAKAZAKII24HA.2427.2505.2	2	14.56	396000		(K)SGLLNR(F)	(K)S/G|L|L N/R(F)		659.384	-0.0006	-0.9
4	CSAKAZAKII24HA.2518.2518.2	2	8.29	396000		(K)SGLLNR(F)	(K)S/G|L|L N/R(F)		659.384	-0.002	-3
Group	Subgroup	Spectra	Distinct	Distinct	% AA	Total	Protein MW	Protein	Species	Database	Protein Name
(#)	(#)	(#)	Peptides	Summed	Coverage	Protein	(Da)	pI		Accession #
			(#)	MS/MS Search		Spectral
				Score		Intensity
4	4.1	3	1	13.55	1.8	46000	38009.2	8.8	CAEEL	V6CLB7
#	Filename	z	Score	Spectrum	Variable	Sequence	Sequence Map	Modifications	MH+	MH+	MH+
				Intensity	Sites			Map	Matched	Mass Shift	Error
									(Da)	(Da)	(ppm)
1	CSAKAZAKII24HC.2550.2559.2	2	13.55	17500		(K)GYLENK(T)	(K)G/Y|L|E/N/K(T)		723.367	-0.0027	-3.8
2	CSAKAZAKII24HB.2571.2579.2	2	9.29	12200		(K)GYLENK(T)	(K)G Y|L/E/N K(T)		723.367	-0.0012	-1.6
3	CSAKAZAKII24HA.2574.2574.2	2	6.46	16300		(K)GYLENK(T)	(K)G Y|L/E N K(T)		723.367	-0.0014	-2
Group	Subgroup	Spectra	Distinct	Distinct	% AA	Total	Protein MW	Protein	Species	Database	Protein Name
(#)	(#)	(#)	Peptides	Summed	Coverage	Protein	(Da)	pI		Accession #
			(#)	MS/MS Search		Spectral
				Score		Intensity
5	5.1	3	1	13.02	1	358000	63688.4	5.62	CAEEL	Q9N4P3
#	Filename	z	Score	Spectrum	Variable	Sequence	Sequence Map	Modifications	MH+	MH+	MH+
				Intensity	Sites			Map	Matched	Mass Shift	Error
									(Da)	(Da)	(ppm)
1	CSAKAZAKII24HB.2520.2530.2	2	13.02	119000		(R)SGIDLR(N)	(R)S/G|I|D L/R(N)		660.367	-0.0027	-4.1
2	CSAKAZAKII24HA.2525.2566.2	2	12.87	120000		(R)SGIDLR(N)	(R)S/G|I|D L/R(N)		660.367	-0.0005	-0.7
3	CSAKAZAKII24HC.2504.2542.2	2	11.91	119000		(R)SGIDLR(N)	(R)S/G|I|D L/R(N)		660.367	-0.0014	-2.2
Group	Subgroup	Spectra	Distinct	Distinct	% AA	Total	Protein MW	Protein	Species	Database	Protein Name
(#)	(#)	(#)	Peptides	Summed	Coverage	Protein	(Da)	pI		Accession #
			(#)	MS/MS Search		Spectral
				Score		Intensity
6	6.1	2	1	12.7	7.9	120000	12029.7	10.56	CAEEL	Q09558
#	Filename	z	Score	Spectrum	Variable	Sequence	Sequence Map	Modifications	MH+	MH+	MH+
				Intensity	Sites			Map	Matched	Mass Shift	Error
									(Da)	(Da)	(ppm)
1	CSAKAZAKII24HA.2292.2292.3	3	12.7	63900		(R)RSVSQRWK(R)	(R)R/S/V|S/Q|R W K(R)		1046.59	0.0075	7.1
2	CSAKAZAKII24HB.2293.2293.3	3	8.07	56600		(R)RSVSQRWK(R)	(R)R S/V|S Q|R\W K(R)		1046.59	0.0073	7
Group	Subgroup	Spectra	Distinct	Distinct	% AA	Total	Protein MW	Protein	Species	Database	Protein Name
(#)	(#)	(#)	Peptides	Summed	Coverage	Protein	(Da)	pI		Accession #
			(#)	MS/MS Search		Spectral
				Score		Intensity
7	7.1	4	2	12.62	5	16400	33215.3	9.86	CAEEL	O45865
#	Filename	z	Score	Spectrum	Variable	Sequence	Sequence Map	Modifications	MH+	MH+	MH+
				Intensity	Sites			Map	Matched	Mass Shift	Error
									(Da)	(Da)	(ppm)
1	CSAKAZAKII24HB.2581.2581.2	2	7.93	3990		(R)LAADIGK(A)	(R)L/A|A/D/I/G K(A)		687.404	-0.0049	-7.2
2	CSAKAZAKII24HC.2580.2580.2	2	7.66	4750		(R)LAADIGK(A)	(R)L/A|A D/I/G K(A)		687.404	-0.0008	-1.2
3	CSAKAZAKII24HB.2662.2662.2	2	4.69	2900		(K)TAVAPIER(V)	(K)T/A|V|A/P I E R(V)		856.489	0.0033	3.8
4	CSAKAZAKII24HC.2572.2572.2	2	4.31	4750		(R)LAADIGK(A)	(R)L/A|A D/I/G K(A)		687.404	-0.0008	-1.2
Group	Subgroup	Spectra	Distinct	Distinct	% AA	Total	Protein MW	Protein	Species	Database	Protein Name
(#)	(#)	(#)	Peptides	Summed	Coverage	Protein	(Da)	pI		Accession #
			(#)	MS/MS Search		Spectral
				Score		Intensity
8	8.1	2	2	12.53	11.7	6700	14454.6	10.88	CAEEL	J7S164
#	Filename	z	Score	Spectrum	Variable	Sequence	Sequence Map	Modifications	MH+	MH+	MH+
				Intensity	Sites			Map	Matched	Mass Shift	Error
									(Da)	(Da)	(ppm)
1	CSAKAZAKII24HA.3750.3750.2	2	6.7	1450		(R)AGLQFPVGR(L)	(R)A/G L|Q\F|P/V G\R(L)		944.531	-0.0003	-0.3
2	CSAKAZAKII24HB.2889.2889.2	2	5.83	5250		(R)HLQLAVR(N)	(R)H/L|Q/L/A V R(N)		836.51	-0.0072	-8.6
Group	Subgroup	Spectra	Distinct	Distinct	% AA	Total	Protein MW	Protein	Species	Database	Protein Name
(#)	(#)	(#)	Peptides	Summed	Coverage	Protein	(Da)	pI		Accession #
			(#)	MS/MS Search		Spectral
				Score		Intensity
9	9.1	3	2	12.46	1.5	150000	109608	4.37	CAEEL	Q09560
#	Filename	z	Score	Spectrum	Variable	Sequence	Sequence Map	Modifications	MH+	MH+	MH+
				Intensity	Sites			Map	Matched	Mass Shift	Error
									(Da)	(Da)	(ppm)
1	CSAKAZAKII24HC.2272.2272.3	3	9.21	67500		(R)EELDAITKK(L)	(R)E E L D/A|I/T K K(L)		1046.57	0.0207	19.8
2	CSAKAZAKII24HB.2289.2289.3	3	8.76	56600		(R)EELDAITKK(L)	(R)E E L D A|I|T K K(L)		1046.57	0.0199	19
3	CSAKAZAKII24HA.2335.2354.2	2	3.25	25800		(K)KMAAEK(K)	(K)K\M A|A\E K(K)		677.365	-0.0057	-8.4
Group	Subgroup	Spectra	Distinct	Distinct	% AA	Total	Protein MW	Protein	Species	Database	Protein Name
(#)	(#)	(#)	Peptides	Summed	Coverage	Protein	(Da)	pI		Accession #
			(#)	MS/MS Search		Spectral
				Score		Intensity
10	10.1	2	2	12.33	5.5	15700	40441.2	7.88	CAEEL	Q9XXS2
#	Filename	z	Score	Spectrum	Variable	Sequence	Sequence Map	Modifications	MH+	MH+	MH+
				Intensity	Sites			Map	Matched	Mass Shift	Error
									(Da)	(Da)	(ppm)
1	CSAKAZAKII24HC.9482.9482.2	2	7.37	12400		(K)IITLANQKCK(E)	(K)I I T L A N/Q/K/C K(E)	C:Carbamidomethylation	1188.68	-0.0016	-1.3
2	CSAKAZAKII24HB.2750.2750.2	2	4.96	3260		(R)HFQDSGSAK(K)	(R)H F Q D\S G S A K(K)		976.448	-0.0043	-4.4
Group	Subgroup	Spectra	Distinct	Distinct	% AA	Total	Protein MW	Protein	Species	Database	Protein Name
(#)	(#)	(#)	Peptides	Summed	Coverage	Protein	(Da)	pI		Accession #
			(#)	MS/MS Search		Spectral
				Score		Intensity
11	11.1	2	1	11.83	2	11600	69685.1	6.48	CAEEL	H2L034
#	Filename	z	Score	Spectrum	Variable	Sequence	Sequence Map	Modifications	MH+	MH+	MH+
				Intensity	Sites			Map	Matched	Mass Shift	Error
									(Da)	(Da)	(ppm)
1	CSAKAZAKII24HB.4139.4139.2	2	11.83	5640		(K)TLLITGDSGIGK(T)	(K)T/L|L I T G D/S/G I G/K(T)		1174.67	-0.0233	-19.9
2	CSAKAZAKII24HC.4103.4103.2	2	11.04	5990		(K)TLLITGDSGIGK(T)	(K)T/L|L/I T G D S/G I G/K(T)		1174.67	-0.0166	-14.1
Group	Subgroup	Spectra	Distinct	Distinct	% AA	Total	Protein MW	Protein	Species	Database	Protein Name
(#)	(#)	(#)	Peptides	Summed	Coverage	Protein	(Da)	pI		Accession #
			(#)	MS/MS Search		Spectral
				Score		Intensity
12	12.1	2	2	11.61	0.7	14800	231090	9.01	CAEEL	O16237
#	Filename	z	Score	Spectrum	Variable	Sequence	Sequence Map	Modifications	MH+	MH+	MH+
				Intensity	Sites			Map	Matched	Mass Shift	Error
									(Da)	(Da)	(ppm)
1	CSAKAZAKII24HB.2311.2311.3	3	7.38	5820		(K)SSLPAASCGK(R)	(K)S S/L P A A/S C G K(R)	C:Carbamidomethylation	977.472	0.0102	10.4
2	CSAKAZAKII24HB.2203.2207.2	2	4.23	8990		(K)IPKGSK(I)	(K)I/P/K G\S/K(I)		629.398	-0.0028	-4.4
Group	Subgroup	Spectra	Distinct	Distinct	% AA	Total	Protein MW	Protein	Species	Database	Protein Name
(#)	(#)	(#)	Peptides	Summed	Coverage	Protein	(Da)	pI		Accession #
			(#)	MS/MS Search		Spectral
				Score		Intensity
13	13.1	1	1	11.55	2	6790	95820.5	5.12	CAEEL	Q9NA64
#	Filename	z	Score	Spectrum	Variable	Sequence	Sequence Map	Modifications	MH+	MH+	MH+
				Intensity	Sites			Map	Matched	Mass Shift	Error
									(Da)	(Da)	(ppm)
1	CSAKAZAKII24HC.3986.3986.4	4	11.55	6790		(K)LNYIESDPQWFENTHHR(V)	(K)L N Y I E S D P/Q\W/F\E/N/T/H H R(V)		2186.01	0.0147	6.7
Group	Subgroup	Spectra	Distinct	Distinct	% AA	Total	Protein MW	Protein	Species	Database	Protein Name
(#)	(#)	(#)	Peptides	Summed	Coverage	Protein	(Da)	pI		Accession #
			(#)	MS/MS Search		Spectral
				Score		Intensity
14	14.1	5	1	10.72	0.1	93600	461741	5.2	CAEEL	H2L075
#	Filename	z	Score	Spectrum	Variable	Sequence	Sequence Map	Modifications	MH+	MH+	MH+
				Intensity	Sites			Map	Matched	Mass Shift	Error
									(Da)	(Da)	(ppm)
1	CSAKAZAKII24HC.3357.3357.2	2	10.72	16000		(R)VSWLK(D)	(R)V/S|W/L/K(D)		632.377	-0.0008	-1.3
2	CSAKAZAKII24HB.3371.3391.2	2	10.25	19700		(R)VSWLK(D)	(R)V/S|W/L/K(D)		632.377	-0.0022	-3.5
3	CSAKAZAKII24HA.3378.3387.2	2	9.72	21000		(R)VSWLK(D)	(R)V/S|W/L/K(D)		632.377	-0.0017	-2.7
4	CSAKAZAKII24HC.3371.3371.2	2	8.29	16000		(R)VSWLK(D)	(R)V/S|W/L/K(D)		632.377	-0.0008	-1.3
5	CSAKAZAKII24HA.3397.3397.2	2	7.96	21000		(R)VSWLK(D)	(R)V|S|W/L K(D)		632.377	-0.0017	-2.7
Group	Subgroup	Spectra	Distinct	Distinct	% AA	Total	Protein MW	Protein	Species	Database	Protein Name
(#)	(#)	(#)	Peptides	Summed	Coverage	Protein	(Da)	pI		Accession #
			(#)	MS/MS Search		Spectral
				Score		Intensity
15	15.1	1	1	10.56	6.3	1510	45012.8	7.83	CAEEL	G5EDP2
#	Filename	z	Score	Spectrum	Variable	Sequence	Sequence Map	Modifications	MH+	MH+	MH+
				Intensity	Sites			Map	Matched	Mass Shift	Error
									(Da)	(Da)	(ppm)
1	CSAKAZAKII24HC.3800.3800.4	4	10.56	1510	M143m M154m M158m	(K)HISVmSETYGLEPAPmTAQmFGNAAK(E)	(K)H I S V m S E T Y G L E P A P m T A/Q\m F G/N/A A K(E)	m:Oxidized methionine	2781.3	47.9615	-8.2
Group	Subgroup	Spectra	Distinct	Distinct	% AA	Total	Protein MW	Protein	Species	Database	Protein Name
(#)	(#)	(#)	Peptides	Summed	Coverage	Protein	(Da)	pI		Accession #
			(#)	MS/MS Search		Spectral
				Score		Intensity
16	16.1	2	1	10.42	11.6	6360	11426.2	11.36	CAEEL	P62784
#	Filename	z	Score	Spectrum	Variable	Sequence	Sequence Map	Modifications	MH+	MH+	MH+
				Intensity	Sites			Map	Matched	Mass Shift	Error
									(Da)	(Da)	(ppm)
1	CSAKAZAKII24HA.3075.3075.3	3	10.42	1930		(R)DNIQGITKPAIR(R)	(R)D N|I|Q G|I/T/K P A I/R(R)		1325.75	-0.0024	-1.8
2	CSAKAZAKII24HB.3065.3065.3	3	8.29	4430		(R)DNIQGITKPAIR(R)	(R)D N|I/Q G\I T K/P\A/I R(R)		1325.75	-0.0034	-2.5
Group	Subgroup	Spectra	Distinct	Distinct	% AA	Total	Protein MW	Protein	Species	Database	Protein Name
(#)	(#)	(#)	Peptides	Summed	Coverage	Protein	(Da)	pI		Accession #
			(#)	MS/MS Search		Spectral
				Score		Intensity
17	17.1	1	1	10.02	2.7	8100	101585	9.22	CAEEL	Q8WQL7
#	Filename	z	Score	Spectrum	Variable	Sequence	Sequence Map	Modifications	MH+	MH+	MH+
				Intensity	Sites			Map	Matched	Mass Shift	Error
									(Da)	(Da)	(ppm)
1	CSAKAZAKII24HA.4657.4657.3	3	10.02	8100	M128m	(K)HRVSmTNAEAALTPGMPPEKQAAK(K)	(K)H R\V S\m T N/A E A A\L/T P/G M P/P E K Q A A/K(K)	m:Oxidized methionine	2535.28	15.9472	-18.7
Group	Subgroup	Spectra	Distinct	Distinct	% AA	Total	Protein MW	Protein	Species	Database	Protein Name
(#)	(#)	(#)	Peptides	Summed	Coverage	Protein	(Da)	pI		Accession #
			(#)	MS/MS Search		Spectral
				Score		Intensity
18	18.1	1	1	9.95	2.2	34700	61407.8	9.55	CAEEL	H2KYE7
#	Filename	z	Score	Spectrum	Variable	Sequence	Sequence Map	Modifications	MH+	MH+	MH+
				Intensity	Sites			Map	Matched	Mass Shift	Error
									(Da)	(Da)	(ppm)
1	CSAKAZAKII24HA.5283.5283.3	3	9.95	34700		(K)HGNVWEQRAAER(A)	(K)H G N V W|E/Q/R\A A\E R(A)		1452.71	0.0065	4.5
Group	Subgroup	Spectra	Distinct	Distinct	% AA	Total	Protein MW	Protein	Species	Database	Protein Name
(#)	(#)	(#)	Peptides	Summed	Coverage	Protein	(Da)	pI		Accession #
			(#)	MS/MS Search		Spectral
				Score		Intensity
19	19.1	1	1	9.84	1.2	18300	129634	8.78	CAEEL	B2MZB8
#	Filename	z	Score	Spectrum	Variable	Sequence	Sequence Map	Modifications	MH+	MH+	MH+
				Intensity	Sites			Map	Matched	Mass Shift	Error
									(Da)	(Da)	(ppm)
1	CSAKAZAKII24HA.3850.3850.3	3	9.84	18300		(R)TYIGTSNTVCHMMK(E)	(R)T\Y I G T S/N T V C/H\M M/K(E)	C:Carbamidomethylation	1642.74	-0.0031	-1.9
Group	Subgroup	Spectra	Distinct	Distinct	% AA	Total	Protein MW	Protein	Species	Database	Protein Name
(#)	(#)	(#)	Peptides	Summed	Coverage	Protein	(Da)	pI		Accession #
			(#)	MS/MS Search		Spectral
				Score		Intensity
20	20.1	1	1	9.81	2.1	9210	53281.6	9.38	CAEEL	Q8MYL9
#	Filename	z	Score	Spectrum	Variable	Sequence	Sequence Map	Modifications	MH+	MH+	MH+
				Intensity	Sites			Map	Matched	Mass Shift	Error
									(Da)	(Da)	(ppm)
1	CSAKAZAKII24HA.4123.4137.2	2	9.81	9210		(K)LTCRTVISPK(M)	(K)L T|C R T V I/S P/K(M)	C:Carbamidomethylation	1174.66	-0.0178	-15.2
Group	Subgroup	Spectra	Distinct	Distinct	% AA	Total	Protein MW	Protein	Species	Database	Protein Name
(#)	(#)	(#)	Peptides	Summed	Coverage	Protein	(Da)	pI		Accession #
			(#)	MS/MS Search		Spectral
				Score		Intensity
21	21.1	2	2	9.71	1	637000	131610	9.31	CAEEL	Q20878
#	Filename	z	Score	Spectrum	Variable	Sequence	Sequence Map	Modifications	MH+	MH+	MH+
				Intensity	Sites			Map	Matched	Mass Shift	Error
									(Da)	(Da)	(ppm)
1	CSAKAZAKII24HB.2322.2372.2	2	6.53	189000		(K)SLEYK(N)	(K)S/L|E Y K(N)		639.335	0.0093	14.6
2	CSAKAZAKII24HA.4166.4166.2	2	3.18	449000		(K)RTLFGEK(V)	(K)R T L F G E K(V)		850.478	0.0167	19.7
Group	Subgroup	Spectra	Distinct	Distinct	% AA	Total	Protein MW	Protein	Species	Database	Protein Name
(#)	(#)	(#)	Peptides	Summed	Coverage	Protein	(Da)	pI		Accession #
			(#)	MS/MS Search		Spectral
				Score		Intensity
22	22.1	1	1	9.56	3.1	1920	40413.2	9.18	CAEEL	Q21600
#	Filename	z	Score	Spectrum	Variable	Sequence	Sequence Map	Modifications	MH+	MH+	MH+
				Intensity	Sites			Map	Matched	Mass Shift	Error
									(Da)	(Da)	(ppm)
1	CSAKAZAKII24HA.2730.2730.3	3	9.56	1920		(R)STSIGSLNTIK(S)	(R)S/T/S I/G S L N T|I K(S)		1120.62	-0.021	-18.7
Group	Subgroup	Spectra	Distinct	Distinct	% AA	Total	Protein MW	Protein	Species	Database	Protein Name
(#)	(#)	(#)	Peptides	Summed	Coverage	Protein	(Da)	pI		Accession #
			(#)	MS/MS Search		Spectral
				Score		Intensity
23	23.1	1	1	9.56	1.9	16000	48532.3	6.71	CAEEL	Q9XVS8
#	Filename	z	Score	Spectrum	Variable	Sequence	Sequence Map	Modifications	MH+	MH+	MH+
				Intensity	Sites			Map	Matched	Mass Shift	Error
									(Da)	(Da)	(ppm)
1	CSAKAZAKII24HB.2905.2905.2	2	9.56	16000		(K)ISSGEELK(K)	(K)I/S|S G E/E L/K(K)		862.452	-0.0118	-13.7
Group	Subgroup	Spectra	Distinct	Distinct	% AA	Total	Protein MW	Protein	Species	Database	Protein Name
(#)	(#)	(#)	Peptides	Summed	Coverage	Protein	(Da)	pI		Accession #
			(#)	MS/MS Search		Spectral
				Score		Intensity
24	24.1	4	1	9.38	2.7	230000	74997.9	8.26	CAEEL	O62139
#	Filename	z	Score	Spectrum	Variable	Sequence	Sequence Map	Modifications	MH+	MH+	MH+
				Intensity	Sites			Map	Matched	Mass Shift	Error
									(Da)	(Da)	(ppm)
1	CSAKAZAKII24HC.3936.3973.3	3	9.38	56700	M65m	(K)IPELADTQPFPFmDRLEK(I)	(K)I P/E L/A D T Q P F P|F m D R L E K(I)	m:Oxidized methionine	2147.08	15.9678	-12.5
2	CSAKAZAKII24HB.3957.3998.3	3	9.11	62200	M65m	(K)IPELADTQPFPFmDRLEK(I)	(K)I P/E L/A D T Q P F P|F m D R L E/K(I)	m:Oxidized methionine	2147.08	15.9677	-12.6
3	CSAKAZAKII24HA.3952.4006.3	3	7.97	61100	M65m	(K)IPELADTQPFPFmDRLEK(I)	(K)I P/E L/A D T Q P F P|F m D R L E/K(I)	m:Oxidized methionine	2147.08	15.9679	-12.5
4	CSAKAZAKII24HA.4007.4007.2	2	4.07	50400	M65m	(K)IPELADTQPFPFmDRLEK(I)	(K)I P\E L/A D T Q P\F P|F m D R L E K(I)	m:Oxidized methionine	2147.08	15.9637	-14.4
Group	Subgroup	Spectra	Distinct	Distinct	% AA	Total	Protein MW	Protein	Species	Database	Protein Name
(#)	(#)	(#)	Peptides	Summed	Coverage	Protein	(Da)	pI		Accession #
			(#)	MS/MS Search		Spectral
				Score		Intensity
25	25.1	4	1	9.37	1.5	1090000	55695.2	11.42	CAEEL	Q09633
#	Filename	z	Score	Spectrum	Variable	Sequence	Sequence Map	Modifications	MH+	MH+	MH+
				Intensity	Sites			Map	Matched	Mass Shift	Error
									(Da)	(Da)	(ppm)
1	CSAKAZAKII24HC.2081.2122.2	2	9.37	265000		(R)SASTARGR(S)	(R)S/A|S T/A R G/R(S)		805.428	-0.0128	-15.9
2	CSAKAZAKII24HA.2094.2132.2	2	8.94	253000		(R)SASTARGR(S)	(R)S/A|S T/A R G/R(S)		805.428	-0.0131	-16.3
3	CSAKAZAKII24HB.2091.2133.2	2	8.77	287000		(R)SASTARGR(S)	(R)S/A|S T/A R G R(S)		805.428	-0.0138	-17.2
4	CSAKAZAKII24HB.2158.2158.2	2	8.61	287000		(R)SASTARGR(S)	(R)S A|S/T/A/R G R(S)		805.428	-0.0123	-15.3
Group	Subgroup	Spectra	Distinct	Distinct	% AA	Total	Protein MW	Protein	Species	Database	Protein Name
(#)	(#)	(#)	Peptides	Summed	Coverage	Protein	(Da)	pI		Accession #
			(#)	MS/MS Search		Spectral
				Score		Intensity
26	26.1	2	1	9.2	1.6	8730	55582.5	8.78	CAEEL	Q9NF64
#	Filename	z	Score	Spectrum	Variable	Sequence	Sequence Map	Modifications	MH+	MH+	MH+
				Intensity	Sites			Map	Matched	Mass Shift	Error
									(Da)	(Da)	(ppm)
1	CSAKAZAKII24HC.2719.2719.2	2	9.2	4360		(R)QISNEEEK(Q)	(R)Q I S N|E E|E K(Q)		976.458	-0.0093	-9.5
2	CSAKAZAKII24HC.2732.2732.2	2	6.35	4360		(R)QISNEEEK(Q)	(R)Q|I S N|E E|E\K(Q)		976.458	-0.0093	-9.5
Group	Subgroup	Spectra	Distinct	Distinct	% AA	Total	Protein MW	Protein	Species	Database	Protein Name
(#)	(#)	(#)	Peptides	Summed	Coverage	Protein	(Da)	pI		Accession #
			(#)	MS/MS Search		Spectral
				Score		Intensity
27	27.1	3	1	9.13	4.5	161000	46776.7	7.82	CAEEL	H2L0B0
#	Filename	z	Score	Spectrum	Variable	Sequence	Sequence Map	Modifications	MH+	MH+	MH+
				Intensity	Sites			Map	Matched	Mass Shift	Error
									(Da)	(Da)	(ppm)
1	CSAKAZAKII24HA.4049.4049.3	3	9.13	61100	M131m M136m	(R)EIVHRmDGFSmFLKPAPR(G)	(R)E/I V H R m\D G/F/S m F L K P/A P R(G)	m:Oxidized methionine	2131.09	31.955	-16.1
2	CSAKAZAKII24HC.3937.3937.2	2	4.83	49500	M131m M136m	(R)EIVHRmDGFSmFLKPAPR(G)	(R)E I V H R m\D G|F S m/F L K P A P R(G)	m:Oxidized methionine	2131.09	31.9564	-15.5
3	CSAKAZAKII24HA.3983.3983.2	2	3.55	50400	M131m M136m	(R)EIVHRmDGFSmFLKPAPR(G)	(R)E I V H R m\D G/F S m/F L K/P A P R(G)	m:Oxidized methionine	2131.09	31.9539	-16.6
Group	Subgroup	Spectra	Distinct	Distinct	% AA	Total	Protein MW	Protein	Species	Database	Protein Name
(#)	(#)	(#)	Peptides	Summed	Coverage	Protein	(Da)	pI		Accession #
			(#)	MS/MS Search		Spectral
				Score		Intensity
28	28.1	5	1	9.08	2.8	239000	36175.7	8.5	CAEEL	O62515
#	Filename	z	Score	Spectrum	Variable	Sequence	Sequence Map	Modifications	MH+	MH+	MH+
				Intensity	Sites			Map	Matched	Mass Shift	Error
									(Da)	(Da)	(ppm)
1	CSAKAZAKII24HA.2914.2945.2	2	9.08	46400		(K)APENMTVMK(D)	(K)A/P|E N M T V M/K(D)		1020.49	0.0154	15.1
2	CSAKAZAKII24HB.2910.2945.2	2	6.54	47500		(K)APENMTVMK(D)	(K)A/P|E N M T V M/K(D)		1020.49	0.0142	13.9
3	CSAKAZAKII24HC.2896.2929.2	2	4.56	51400		(K)APENMTVMK(D)	(K)A/P|E N M T V M/K(D)		1020.49	0.0154	15.1
4	CSAKAZAKII24HB.2953.2953.2	2	4.33	47500		(K)APENMTVMK(D)	(K)A/P|E N M T V M K(D)		1020.49	0.0142	13.9
5	CSAKAZAKII24HA.2948.2948.2	2	3.65	46400		(K)APENMTVMK(D)	(K)A/P|E N M T V M K(D)		1020.49	0.0154	15.1
Group	Subgroup	Spectra	Distinct	Distinct	% AA	Total	Protein MW	Protein	Species	Database	Protein Name
(#)	(#)	(#)	Peptides	Summed	Coverage	Protein	(Da)	pI		Accession #
			(#)	MS/MS Search		Spectral
				Score		Intensity
29	29.1	1	1	9.03	1.4	232000	83783.3	6.31	CAEEL	P34422
#	Filename	z	Score	Spectrum	Variable	Sequence	Sequence Map	Modifications	MH+	MH+	MH+
				Intensity	Sites			Map	Matched	Mass Shift	Error
									(Da)	(Da)	(ppm)
1	CSAKAZAKII24HC.3322.3322.2	2	9.03	232000		(K)YSSVSLSPDAK(Q)	(K)Y S S V S|L S P|D/A/K(Q)		1153.57	-0.0019	-1.7
Group	Subgroup	Spectra	Distinct	Distinct	% AA	Total	Protein MW	Protein	Species	Database	Protein Name
(#)	(#)	(#)	Peptides	Summed	Coverage	Protein	(Da)	pI		Accession #
			(#)	MS/MS Search		Spectral
				Score		Intensity
30	30.1	2	1	8.97	5.4	14100	25532.8	9.64	CAEEL	Q9TY00
#	Filename	z	Score	Spectrum	Variable	Sequence	Sequence Map	Modifications	MH+	MH+	MH+
				Intensity	Sites			Map	Matched	Mass Shift	Error
									(Da)	(Da)	(ppm)
1	CSAKAZAKII24HB.4184.4184.2	2	8.97	7590		(R)TVSQNSELLKEK(N)	(R)T V S Q|N|S\E\L L/K E/K(N)		1375.74	-0.0218	-15.9
2	CSAKAZAKII24HC.4166.4166.2	2	5.01	6540		(R)TVSQNSELLKEK(N)	(R)T\V S Q/N/S E\L L/K E/K(N)		1375.74	-0.0208	-15.2
Group	Subgroup	Spectra	Distinct	Distinct	% AA	Total	Protein MW	Protein	Species	Database	Protein Name
(#)	(#)	(#)	Peptides	Summed	Coverage	Protein	(Da)	pI		Accession #
			(#)	MS/MS Search		Spectral
				Score		Intensity
31	31.1	2	1	8.96	2.6	24700	47717.5	7.86	CAEEL	Q20169
#	Filename	z	Score	Spectrum	Variable	Sequence	Sequence Map	Modifications	MH+	MH+	MH+
				Intensity	Sites			Map	Matched	Mass Shift	Error
									(Da)	(Da)	(ppm)
1	CSAKAZAKII24HB.3873.3873.3	3	8.96	6980	M200m M201m	(K)RINPELNQmmR(G)	(K)R I\N P\E/L|N/Q\m m R(G)	m:Oxidized methionine	1401.71	32.0086	13.1
2	CSAKAZAKII24HA.3874.3899.2	2	4.86	17800	M200m M201m	(K)RINPELNQmmR(G)	(K)R I\N\P E/L N/Q\m m R(G)	m:Oxidized methionine	1401.71	32.0094	13.6
Group	Subgroup	Spectra	Distinct	Distinct	% AA	Total	Protein MW	Protein	Species	Database	Protein Name
(#)	(#)	(#)	Peptides	Summed	Coverage	Protein	(Da)	pI		Accession #
			(#)	MS/MS Search		Spectral
				Score		Intensity
32	32.1	1	1	8.89	2.6	632	53203.4	9.05	CAEEL	Q9U334
#	Filename	z	Score	Spectrum	Variable	Sequence	Sequence Map	Modifications	MH+	MH+	MH+
				Intensity	Sites			Map	Matched	Mass Shift	Error
									(Da)	(Da)	(ppm)
1	CSAKAZAKII24HC.2435.2435.2	2	8.89	632		(K)NGFDFTLMVVGR(S)	(K)N/G F/D F T L M V V/G R(S)		1355.68	0.0161	11.9
Group	Subgroup	Spectra	Distinct	Distinct	% AA	Total	Protein MW	Protein	Species	Database	Protein Name
(#)	(#)	(#)	Peptides	Summed	Coverage	Protein	(Da)	pI		Accession #
			(#)	MS/MS Search		Spectral
				Score		Intensity
33	33.1	1	1	8.86	1.1	1170	159573	6.13	CAEEL	G5EDY1
#	Filename	z	Score	Spectrum	Variable	Sequence	Sequence Map	Modifications	MH+	MH+	MH+
				Intensity	Sites			Map	Matched	Mass Shift	Error
									(Da)	(Da)	(ppm)
1	CSAKAZAKII24HC.3460.3460.4	4	8.86	1170		(R)QGVLLYPSPATAFAGR(F)	(R)Q G V\L\L Y/P|S/P A T\A F A G/R(F)		1647.88	0.0013	0.8
Group	Subgroup	Spectra	Distinct	Distinct	% AA	Total	Protein MW	Protein	Species	Database	Protein Name
(#)	(#)	(#)	Peptides	Summed	Coverage	Protein	(Da)	pI		Accession #
			(#)	MS/MS Search		Spectral
				Score		Intensity
34	34.1	1	1	8.82	12.1	22700	19315.3	6.8	CAEEL	E0AHC8
#	Filename	z	Score	Spectrum	Variable	Sequence	Sequence Map	Modifications	MH+	MH+	MH+
				Intensity	Sites			Map	Matched	Mass Shift	Error
									(Da)	(Da)	(ppm)
1	CSAKAZAKII24HC.4644.4644.3	3	8.82	22700		(R)HKTDTVKHSTQPVYSHHCTMR(F)	(R)H K T D T V\K H/S T Q\P\V Y S\H/H\C T\M R(F)	C:Carbamidomethylation	2550.21	0.0137	5.4
Group	Subgroup	Spectra	Distinct	Distinct	% AA	Total	Protein MW	Protein	Species	Database	Protein Name
(#)	(#)	(#)	Peptides	Summed	Coverage	Protein	(Da)	pI		Accession #
			(#)	MS/MS Search		Spectral
				Score		Intensity
35	35.1	1	1	8.81	4.3	22600	61967	9.57	CAEEL	Q95Y89
#	Filename	z	Score	Spectrum	Variable	Sequence	Sequence Map	Modifications	MH+	MH+	MH+
				Intensity	Sites			Map	Matched	Mass Shift	Error
									(Da)	(Da)	(ppm)
1	CSAKAZAKII24HB.4644.4657.3	3	8.81	22600	M429m	(R)SmGKDVSDLEAAIPKTMDELPMR(R)	(R)S/m G K D\V S D\L/E A A I P K T M D E/L P\M R(R)	m:Oxidized methionine	2534.23	15.9856	-3.7
Group	Subgroup	Spectra	Distinct	Distinct	% AA	Total	Protein MW	Protein	Species	Database	Protein Name
(#)	(#)	(#)	Peptides	Summed	Coverage	Protein	(Da)	pI		Accession #
			(#)	MS/MS Search		Spectral
				Score		Intensity
36	36.1	3	1	8.61	2.2	265000	39478.2	6.48	CAEEL	G5EGG8
#	Filename	z	Score	Spectrum	Variable	Sequence	Sequence Map	Modifications	MH+	MH+	MH+
				Intensity	Sites			Map	Matched	Mass Shift	Error
									(Da)	(Da)	(ppm)
1	CSAKAZAKII24HA.2092.2092.2	2	8.61	89600		(R)TGSASLDR(L)	(R)T\G|S A/S L D/R(L)		806.4	-0.004	-5
2	CSAKAZAKII24HC.2079.2108.2	2	8.38	95100		(R)TGSASLDR(L)	(R)T\G|S A|S L D/R(L)		806.4	-0.0009	-1.1
3	CSAKAZAKII24HA.2234.2234.2	2	5.61	80800		(R)TGSASLDR(L)	(R)T G|S A|S/L D R(L)		806.4	-0.004	-5
Group	Subgroup	Spectra	Distinct	Distinct	% AA	Total	Protein MW	Protein	Species	Database	Protein Name
(#)	(#)	(#)	Peptides	Summed	Coverage	Protein	(Da)	pI		Accession #
			(#)	MS/MS Search		Spectral
				Score		Intensity
37	37.1	1	1	8.5	4	12600	67405.8	6.14	CAEEL	O61192
#	Filename	z	Score	Spectrum	Variable	Sequence	Sequence Map	Modifications	MH+	MH+	MH+
				Intensity	Sites			Map	Matched	Mass Shift	Error
									(Da)	(Da)	(ppm)
1	CSAKAZAKII24HC.4646.4646.2	2	8.5	12600		(R)QQISLSANNGATSAEPINMSEFLK(Q)	(R)Q Q I S L/S A N\N G A T S A E P/I N M S E F L K(Q)		2550.25	-0.0187	-7.3
Group	Subgroup	Spectra	Distinct	Distinct	% AA	Total	Protein MW	Protein	Species	Database	Protein Name
(#)	(#)	(#)	Peptides	Summed	Coverage	Protein	(Da)	pI		Accession #
			(#)	MS/MS Search		Spectral
				Score		Intensity
38	38.1	1	1	8.37	1.5	63900	62978.1	9.59	CAEEL	A0A0S4XR26
#	Filename	z	Score	Spectrum	Variable	Sequence	Sequence Map	Modifications	MH+	MH+	MH+
				Intensity	Sites			Map	Matched	Mass Shift	Error
									(Da)	(Da)	(ppm)
1	CSAKAZAKII24HA.2313.2313.3	3	8.37	63900		(K)VMLAQKNRS(-)	(K)V M L/A/Q/K|N\R S(-)		1046.58	0.0153	14.6
Group	Subgroup	Spectra	Distinct	Distinct	% AA	Total	Protein MW	Protein	Species	Database	Protein Name
(#)	(#)	(#)	Peptides	Summed	Coverage	Protein	(Da)	pI		Accession #
			(#)	MS/MS Search		Spectral
				Score		Intensity
39	39.1	1	1	8.23	2.7	25200	38618.7	9.65	CAEEL	P91475
#	Filename	z	Score	Spectrum	Variable	Sequence	Sequence Map	Modifications	MH+	MH+	MH+
				Intensity	Sites			Map	Matched	Mass Shift	Error
									(Da)	(Da)	(ppm)
1	CSAKAZAKII24HB.2297.2297.3	3	8.23	25200		(K)RLTSTLSNR(Y)	(K)R L T S/T/L/S/N\R(Y)		1047.59	0.0037	3.6
Group	Subgroup	Spectra	Distinct	Distinct	% AA	Total	Protein MW	Protein	Species	Database	Protein Name
(#)	(#)	(#)	Peptides	Summed	Coverage	Protein	(Da)	pI		Accession #
			(#)	MS/MS Search		Spectral
				Score		Intensity
40	40.1	1	1	8.2	2.3	3650	54272.7	6.24	CAEEL	P52717
#	Filename	z	Score	Spectrum	Variable	Sequence	Sequence Map	Modifications	MH+	MH+	MH+
				Intensity	Sites			Map	Matched	Mass Shift	Error
									(Da)	(Da)	(ppm)
1	CSAKAZAKII24HC.3821.3821.3	3	8.2	3650		(K)IWNTLERDCCR(G)	(K)I W\N|T L/E/R D C\C R(G)	C:Carbamidomethylation	1522.69	0.0152	10
Group	Subgroup	Spectra	Distinct	Distinct	% AA	Total	Protein MW	Protein	Species	Database	Protein Name
(#)	(#)	(#)	Peptides	Summed	Coverage	Protein	(Da)	pI		Accession #
			(#)	MS/MS Search		Spectral
				Score		Intensity
41	41.1	1	1	8.19	4.4	51500	47230.2	8.5	CAEEL	O01733
#	Filename	z	Score	Spectrum	Variable	Sequence	Sequence Map	Modifications	MH+	MH+	MH+
				Intensity	Sites			Map	Matched	Mass Shift	Error
									(Da)	(Da)	(ppm)
1	CSAKAZAKII24HB.3535.3535.4	4	8.19	51500		(R)DNGQHKTIFMFDFGLAKK(F)	(R)D N G\Q H\K T I F|M F D F\G L A K K(F)		2097.06	0.0368	17.5
Group	Subgroup	Spectra	Distinct	Distinct	% AA	Total	Protein MW	Protein	Species	Database	Protein Name
(#)	(#)	(#)	Peptides	Summed	Coverage	Protein	(Da)	pI		Accession #
			(#)	MS/MS Search		Spectral
				Score		Intensity
42	42.1	1	1	8.16	2.3	22700	104424	9	CAEEL	G5EEK3
#	Filename	z	Score	Spectrum	Variable	Sequence	Sequence Map	Modifications	MH+	MH+	MH+
				Intensity	Sites			Map	Matched	Mass Shift	Error
									(Da)	(Da)	(ppm)
1	CSAKAZAKII24HC.4667.4667.3	3	8.16	22700		(R)RLYYEDSSETYIPSSPSLTTLK(D)	(R)R L Y Y E D/S S E T/Y I P S S P/S/L T T L K(D)		2550.26	-0.0385	-15.1
Group	Subgroup	Spectra	Distinct	Distinct	% AA	Total	Protein MW	Protein	Species	Database	Protein Name
(#)	(#)	(#)	Peptides	Summed	Coverage	Protein	(Da)	pI		Accession #
			(#)	MS/MS Search		Spectral
				Score		Intensity
43	43.1	1	1	8.11	1.1	19900	77960.4	9.04	CAEEL	Q22249
#	Filename	z	Score	Spectrum	Variable	Sequence	Sequence Map	Modifications	MH+	MH+	MH+
				Intensity	Sites			Map	Matched	Mass Shift	Error
									(Da)	(Da)	(ppm)
1	CSAKAZAKII24HC.2889.2889.2	2	8.11	19900		(K)IDSLSAEK(T)	(K)I/D/S L/S A E K(T)		862.452	-0.0089	-10.4
Group	Subgroup	Spectra	Distinct	Distinct	% AA	Total	Protein MW	Protein	Species	Database	Protein Name
(#)	(#)	(#)	Peptides	Summed	Coverage	Protein	(Da)	pI		Accession #
			(#)	MS/MS Search		Spectral
				Score		Intensity
44	44.1	2	1	8.04	1	352000	55271.1	8.69	CAEEL	H2KZ09
#	Filename	z	Score	Spectrum	Variable	Sequence	Sequence Map	Modifications	MH+	MH+	MH+
				Intensity	Sites			Map	Matched	Mass Shift	Error
									(Da)	(Da)	(ppm)
1	CSAKAZAKII24HC.2316.2367.2	2	8.04	163000		(R)SLYEK(L)	(R)S/L|Y/E K(L)		639.335	0.0098	15.3
2	CSAKAZAKII24HB.2322.2372.2	2	6.53	189000		(R)SLYEK(L)	(R)S/L|Y E K(L)		639.335	0.0093	14.6
Group	Subgroup	Spectra	Distinct	Distinct	% AA	Total	Protein MW	Protein	Species	Database	Protein Name
(#)	(#)	(#)	Peptides	Summed	Coverage	Protein	(Da)	pI		Accession #
			(#)	MS/MS Search		Spectral
				Score		Intensity
45	45.1	1	1	8.01	16	122000	13459.3	9.22	CAEEL	O16542
#	Filename	z	Score	Spectrum	Variable	Sequence	Sequence Map	Modifications	MH+	MH+	MH+
				Intensity	Sites			Map	Matched	Mass Shift	Error
									(Da)	(Da)	(ppm)
1	CSAKAZAKII24HC.4290.4290.3	3	8.01	122000		(K)KILFFLYFCCNLAHGLTR(Q)	(K)K/I L/F/F L Y F C C N L A\H G L T R(Q)	C:Carbamidomethylation	2273.17	-0.0153	-6.7
Group	Subgroup	Spectra	Distinct	Distinct	% AA	Total	Protein MW	Protein	Species	Database	Protein Name
(#)	(#)	(#)	Peptides	Summed	Coverage	Protein	(Da)	pI		Accession #
			(#)	MS/MS Search		Spectral
				Score		Intensity
46	46.1	1	1	7.96	1.7	13200	85072.4	8.52	CAEEL	G5EEA7
#	Filename	z	Score	Spectrum	Variable	Sequence	Sequence Map	Modifications	MH+	MH+	MH+
				Intensity	Sites			Map	Matched	Mass Shift	Error
									(Da)	(Da)	(ppm)
1	CSAKAZAKII24HC.4295.4295.3	3	7.96	13200		(R)RFYEPFTSFFALK(L)	(R)R F/Y/E P|F T S\F F A/L/K(L)		1652.85	-0.0216	-13.1
Group	Subgroup	Spectra	Distinct	Distinct	% AA	Total	Protein MW	Protein	Species	Database	Protein Name
(#)	(#)	(#)	Peptides	Summed	Coverage	Protein	(Da)	pI		Accession #
			(#)	MS/MS Search		Spectral
				Score		Intensity
47	47.1	1	1	7.94	4.6	1170	35114	6.42	CAEEL	Q5FC21
#	Filename	z	Score	Spectrum	Variable	Sequence	Sequence Map	Modifications	MH+	MH+	MH+
				Intensity	Sites			Map	Matched	Mass Shift	Error
									(Da)	(Da)	(ppm)
1	CSAKAZAKII24HC.3456.3456.4	4	7.94	1170		(R)HVAFVMDGNRRFAK(T)	(R)H V A F/V M D G/N R R F\A K(T)		1647.85	0.033	20
Group	Subgroup	Spectra	Distinct	Distinct	% AA	Total	Protein MW	Protein	Species	Database	Protein Name
(#)	(#)	(#)	Peptides	Summed	Coverage	Protein	(Da)	pI		Accession #
			(#)	MS/MS Search		Spectral
				Score		Intensity
48	48.1	1	1	7.8	5.3	7030	47101.1	8.84	CAEEL	Q21039
#	Filename	z	Score	Spectrum	Variable	Sequence	Sequence Map	Modifications	MH+	MH+	MH+
				Intensity	Sites			Map	Matched	Mass Shift	Error
									(Da)	(Da)	(ppm)
1	CSAKAZAKII24HC.3979.3979.3	3	7.8	7030		(K)GPRGPPGDDGNSPTDGHPGDNGK(D)	(K)G P R G P P G D D G N S P T D/G/H P G D\N G K(D)		2200.96	0.0289	13.1
Group	Subgroup	Spectra	Distinct	Distinct	% AA	Total	Protein MW	Protein	Species	Database	Protein Name
(#)	(#)	(#)	Peptides	Summed	Coverage	Protein	(Da)	pI		Accession #
			(#)	MS/MS Search		Spectral
				Score		Intensity
49	49.1	1	1	7.77	3.8	8420	39284.3	8.41	CAEEL	O44517
#	Filename	z	Score	Spectrum	Variable	Sequence	Sequence Map	Modifications	MH+	MH+	MH+
				Intensity	Sites			Map	Matched	Mass Shift	Error
									(Da)	(Da)	(ppm)
1	CSAKAZAKII24HA.3884.3884.3	3	7.77	8420		(R)CILTTVNPETGTK(D)	(R)C I/L T T/V N/P E T G\T K(D)	C:Carbamidomethylation	1433.73	-0.0165	-11.5
Group	Subgroup	Spectra	Distinct	Distinct	% AA	Total	Protein MW	Protein	Species	Database	Protein Name
(#)	(#)	(#)	Peptides	Summed	Coverage	Protein	(Da)	pI		Accession #
			(#)	MS/MS Search		Spectral
				Score		Intensity
50	50.1	1	1	7.74	2	36400	77300.5	7.79	CAEEL	Q20059
#	Filename	z	Score	Spectrum	Variable	Sequence	Sequence Map	Modifications	MH+	MH+	MH+
				Intensity	Sites			Map	Matched	Mass Shift	Error
									(Da)	(Da)	(ppm)
1	CSAKAZAKII24HA.4306.4342.2	2	7.74	36400		(-)MSSCVNTSQTGPKKK(I)	(-)M S S C V N T S Q/T/G/P K K/K(I)	C:Carbamidomethylation	1652.81	0.0124	7.5
Group	Subgroup	Spectra	Distinct	Distinct	% AA	Total	Protein MW	Protein	Species	Database	Protein Name
(#)	(#)	(#)	Peptides	Summed	Coverage	Protein	(Da)	pI		Accession #
			(#)	MS/MS Search		Spectral
				Score		Intensity
51	51.1	1	1	7.69	0.5	35800	117809	6.43	CAEEL	O76571
#	Filename	z	Score	Spectrum	Variable	Sequence	Sequence Map	Modifications	MH+	MH+	MH+
				Intensity	Sites			Map	Matched	Mass Shift	Error
									(Da)	(Da)	(ppm)
1	CSAKAZAKII24HC.2825.2829.2	2	7.69	35800		(K)IVEAGR(L)	(K)I/V E/A/G/R(L)		644.373	-0.0018	-2.8
Group	Subgroup	Spectra	Distinct	Distinct	% AA	Total	Protein MW	Protein	Species	Database	Protein Name
(#)	(#)	(#)	Peptides	Summed	Coverage	Protein	(Da)	pI		Accession #
			(#)	MS/MS Search		Spectral
				Score		Intensity
52	52.1	1	1	7.66	3.2	67500	31791.1	9.38	CAEEL	G5EFI9
#	Filename	z	Score	Spectrum	Variable	Sequence	Sequence Map	Modifications	MH+	MH+	MH+
				Intensity	Sites			Map	Matched	Mass Shift	Error
									(Da)	(Da)	(ppm)
1	CSAKAZAKII24HC.2301.2301.3	3	7.66	67500		(R)AKMNIISNR(M)	(R)A K M N I|I|S/N R(M)		1046.58	0.016	15.3
Group	Subgroup	Spectra	Distinct	Distinct	% AA	Total	Protein MW	Protein	Species	Database	Protein Name
(#)	(#)	(#)	Peptides	Summed	Coverage	Protein	(Da)	pI		Accession #
			(#)	MS/MS Search		Spectral
				Score		Intensity
53	53.1	1	1	7.66	1.6	95100	55502.8	6.31	CAEEL	Q09989
#	Filename	z	Score	Spectrum	Variable	Sequence	Sequence Map	Modifications	MH+	MH+	MH+
				Intensity	Sites			Map	Matched	Mass Shift	Error
									(Da)	(Da)	(ppm)
1	CSAKAZAKII24HC.2206.2206.2	2	7.66	95100		(R)SADSEAVK(R)	(R)S A|D\S E|A V/K(R)		806.389	0.0103	12.8
Group	Subgroup	Spectra	Distinct	Distinct	% AA	Total	Protein MW	Protein	Species	Database	Protein Name
(#)	(#)	(#)	Peptides	Summed	Coverage	Protein	(Da)	pI		Accession #
			(#)	MS/MS Search		Spectral
				Score		Intensity
54	54.1	1	1	7.64	4.6	61100	46529.3	8.77	CAEEL	Q19683
#	Filename	z	Score	Spectrum	Variable	Sequence	Sequence Map	Modifications	MH+	MH+	MH+
				Intensity	Sites			Map	Matched	Mass Shift	Error
									(Da)	(Da)	(ppm)
1	CSAKAZAKII24HA.4029.4029.3	3	7.64	61100		(R)FFAANVGVKFQTPEEFFGK(S)	(R)F F A A N V/G V K F Q|T P E E F F G K(S)		2163.09	-0.042	-19.4
Group	Subgroup	Spectra	Distinct	Distinct	% AA	Total	Protein MW	Protein	Species	Database	Protein Name
(#)	(#)	(#)	Peptides	Summed	Coverage	Protein	(Da)	pI		Accession #
			(#)	MS/MS Search		Spectral
				Score		Intensity
55	55.1	1	1	7.6	2.4	50400	94171.3	6.19	CAEEL	O17744
#	Filename	z	Score	Spectrum	Variable	Sequence	Sequence Map	Modifications	MH+	MH+	MH+
				Intensity	Sites			Map	Matched	Mass Shift	Error
									(Da)	(Da)	(ppm)
1	CSAKAZAKII24HA.3962.3962.2	2	7.6	50400		(K)YAYNNITDGAEAVLLSTYGK(S)	(K)Y A Y N\N I\T D G A E A\V L L S/T Y G/K(S)		2163.06	-0.0126	-5.8
Group	Subgroup	Spectra	Distinct	Distinct	% AA	Total	Protein MW	Protein	Species	Database	Protein Name
(#)	(#)	(#)	Peptides	Summed	Coverage	Protein	(Da)	pI		Accession #
			(#)	MS/MS Search		Spectral
				Score		Intensity
56	56.1	1	1	7.57	9.4	15800	11421.3	10.29	CAEEL	Q9U374
#	Filename	z	Score	Spectrum	Variable	Sequence	Sequence Map	Modifications	MH+	MH+	MH+
				Intensity	Sites			Map	Matched	Mass Shift	Error
									(Da)	(Da)	(ppm)
1	CSAKAZAKII24HA.2293.2293.2	2	7.57	15800		(R)IKAGSTAKDR(H)	(R)I/K|A\G S T/A K D R(H)		1046.6	-0.0045	-4.3
Group	Subgroup	Spectra	Distinct	Distinct	% AA	Total	Protein MW	Protein	Species	Database	Protein Name
(#)	(#)	(#)	Peptides	Summed	Coverage	Protein	(Da)	pI		Accession #
			(#)	MS/MS Search		Spectral
				Score		Intensity
57	57.1	1	1	7.55	0.2	4160	470738	6.25	CAEEL	G5EEV2
#	Filename	z	Score	Spectrum	Variable	Sequence	Sequence Map	Modifications	MH+	MH+	MH+
				Intensity	Sites			Map	Matched	Mass Shift	Error
									(Da)	(Da)	(ppm)
1	CSAKAZAKII24HC.3630.3630.3	3	7.55	4160		(K)YNMIPSAHQSTK(V)	(K)Y N M I/P\S A/H Q S T/K(V)		1376.66	0.024	17.4
Group	Subgroup	Spectra	Distinct	Distinct	% AA	Total	Protein MW	Protein	Species	Database	Protein Name
(#)	(#)	(#)	Peptides	Summed	Coverage	Protein	(Da)	pI		Accession #
			(#)	MS/MS Search		Spectral
				Score		Intensity
58	58.1	1	1	7.54	1.9	252000	29261.6	9.19	CAEEL	O62427
#	Filename	z	Score	Spectrum	Variable	Sequence	Sequence Map	Modifications	MH+	MH+	MH+
				Intensity	Sites			Map	Matched	Mass Shift	Error
									(Da)	(Da)	(ppm)
1	CSAKAZAKII24HA.2333.2382.2	2	7.54	252000		(R)SITYR(S)	(R)S/I|T Y/R(S)		639.346	-0.0011	-1.8
Group	Subgroup	Spectra	Distinct	Distinct	% AA	Total	Protein MW	Protein	Species	Database	Protein Name
(#)	(#)	(#)	Peptides	Summed	Coverage	Protein	(Da)	pI		Accession #
			(#)	MS/MS Search		Spectral
				Score		Intensity
59	59.1	1	1	7.46	5.8	10600	25585.2	7.85	CAEEL	Q22459
#	Filename	z	Score	Spectrum	Variable	Sequence	Sequence Map	Modifications	MH+	MH+	MH+
				Intensity	Sites			Map	Matched	Mass Shift	Error
									(Da)	(Da)	(ppm)
1	CSAKAZAKII24HB.3337.3337.3	3	7.46	10600	M73m	(K)VFAENQYPDTmSR(E)	(K)V F A E N Q Y/P/D T/m S R(E)	m:Oxidized methionine	1557.7	16.0048	6.3
Group	Subgroup	Spectra	Distinct	Distinct	% AA	Total	Protein MW	Protein	Species	Database	Protein Name
(#)	(#)	(#)	Peptides	Summed	Coverage	Protein	(Da)	pI		Accession #
			(#)	MS/MS Search		Spectral
				Score		Intensity
60	60.1	1	1	7.44	2	6440	73900.3	5.78	CAEEL	Q93550
#	Filename	z	Score	Spectrum	Variable	Sequence	Sequence Map	Modifications	MH+	MH+	MH+
				Intensity	Sites			Map	Matched	Mass Shift	Error
									(Da)	(Da)	(ppm)
1	CSAKAZAKII24HC.4796.4796.3	3	7.44	6440	M304m	(R)EFPmVLKKLITNK(V)	(R)E F P m/V/L K K L I T N K(V)	m:Oxidized methionine	1560.92	16.0258	19.6
Group	Subgroup	Spectra	Distinct	Distinct	% AA	Total	Protein MW	Protein	Species	Database	Protein Name
(#)	(#)	(#)	Peptides	Summed	Coverage	Protein	(Da)	pI		Accession #
			(#)	MS/MS Search		Spectral
				Score		Intensity
61	61.1	1	1	7.42	0.8	2080	117348	8.47	CAEEL	Q19204
#	Filename	z	Score	Spectrum	Variable	Sequence	Sequence Map	Modifications	MH+	MH+	MH+
				Intensity	Sites			Map	Matched	Mass Shift	Error
									(Da)	(Da)	(ppm)
1	CSAKAZAKII24HA.2829.2829.3	3	7.42	2080		(R)VCGKGLRSR(S)	(R)V/C G/K G L R S R(S)	C:Carbamidomethylation	1032.57	0.0174	16.9
Group	Subgroup	Spectra	Distinct	Distinct	% AA	Total	Protein MW	Protein	Species	Database	Protein Name
(#)	(#)	(#)	Peptides	Summed	Coverage	Protein	(Da)	pI		Accession #
			(#)	MS/MS Search		Spectral
				Score		Intensity
62	62.1	1	1	7.39	1.2	3740	55918	9.33	CAEEL	H2L0R7
#	Filename	z	Score	Spectrum	Variable	Sequence	Sequence Map	Modifications	MH+	MH+	MH+
				Intensity	Sites			Map	Matched	Mass Shift	Error
									(Da)	(Da)	(ppm)
1	CSAKAZAKII24HA.3790.3790.2	2	7.39	3740		(R)VYVCVR(N)	(R)V Y|V C/V/R(N)	C:Carbamidomethylation	795.418	0.0103	12.9
Group	Subgroup	Spectra	Distinct	Distinct	% AA	Total	Protein MW	Protein	Species	Database	Protein Name
(#)	(#)	(#)	Peptides	Summed	Coverage	Protein	(Da)	pI		Accession #
			(#)	MS/MS Search		Spectral
				Score		Intensity
63	63.1	1	1	7.34	0.2	6450	261793	6.3	CAEEL	G5EC55
#	Filename	z	Score	Spectrum	Variable	Sequence	Sequence Map	Modifications	MH+	MH+	MH+
				Intensity	Sites			Map	Matched	Mass Shift	Error
									(Da)	(Da)	(ppm)
1	CSAKAZAKII24HB.2872.2872.2	2	7.34	6450		(R)RNSAAEK(R)	(R)R N S/A|A E|K(R)		775.406	-0.013	-16.8
Group	Subgroup	Spectra	Distinct	Distinct	% AA	Total	Protein MW	Protein	Species	Database	Protein Name
(#)	(#)	(#)	Peptides	Summed	Coverage	Protein	(Da)	pI		Accession #
			(#)	MS/MS Search		Spectral
				Score		Intensity
64	64.1	1	1	7.33	1.5	18200	38859.7	8.91	CAEEL	A9D7R4
#	Filename	z	Score	Spectrum	Variable	Sequence	Sequence Map	Modifications	MH+	MH+	MH+
				Intensity	Sites			Map	Matched	Mass Shift	Error
									(Da)	(Da)	(ppm)
1	CSAKAZAKII24HC.2327.2337.2	2	7.33	18200		(K)RSEDR(V)	(K)R S|E\D\R(V)		662.322	0.002	3.1
Group	Subgroup	Spectra	Distinct	Distinct	% AA	Total	Protein MW	Protein	Species	Database	Protein Name
(#)	(#)	(#)	Peptides	Summed	Coverage	Protein	(Da)	pI		Accession #
			(#)	MS/MS Search		Spectral
				Score		Intensity
65	65.1	1	1	7.33	0.6	3510	128008	9.33	CAEEL	Q9BKX2
#	Filename	z	Score	Spectrum	Variable	Sequence	Sequence Map	Modifications	MH+	MH+	MH+
				Intensity	Sites			Map	Matched	Mass Shift	Error
									(Da)	(Da)	(ppm)
1	CSAKAZAKII24HB.3702.3702.2	2	7.33	3510	M778m	(K)TQLPmIK(N)	(K)T/Q|L|P m|I/K(N)	m:Oxidized methionine	830.48	15.997	2.4
Group	Subgroup	Spectra	Distinct	Distinct	% AA	Total	Protein MW	Protein	Species	Database	Protein Name
(#)	(#)	(#)	Peptides	Summed	Coverage	Protein	(Da)	pI		Accession #
			(#)	MS/MS Search		Spectral
				Score		Intensity
66	66.1	1	1	7.29	1.5	2270	96496.2	8.47	CAEEL	Q8MXV8
#	Filename	z	Score	Spectrum	Variable	Sequence	Sequence Map	Modifications	MH+	MH+	MH+
				Intensity	Sites			Map	Matched	Mass Shift	Error
									(Da)	(Da)	(ppm)
1	CSAKAZAKII24HB.3073.3073.4	4	7.29	2270		(K)LPIVKPFKGLTGK(I)	(K)L P\I V K P F K\G/L/T G K(I)		1397.89	-0.0014	-1
Group	Subgroup	Spectra	Distinct	Distinct	% AA	Total	Protein MW	Protein	Species	Database	Protein Name
(#)	(#)	(#)	Peptides	Summed	Coverage	Protein	(Da)	pI		Accession #
			(#)	MS/MS Search		Spectral
				Score		Intensity
67	67.1	1	1	7.28	1.4	17500	71827.1	6.18	CAEEL	O45402
#	Filename	z	Score	Spectrum	Variable	Sequence	Sequence Map	Modifications	MH+	MH+	MH+
				Intensity	Sites			Map	Matched	Mass Shift	Error
									(Da)	(Da)	(ppm)
1	CSAKAZAKII24HB.4323.4323.2	2	7.28	17500		(R)KSYIEAMNR(T)	(R)K S Y I E A/M N/R(T)		1111.56	-0.0003	-0.3
Group	Subgroup	Spectra	Distinct	Distinct	% AA	Total	Protein MW	Protein	Species	Database	Protein Name
(#)	(#)	(#)	Peptides	Summed	Coverage	Protein	(Da)	pI		Accession #
			(#)	MS/MS Search		Spectral
				Score		Intensity
68	68.1	5	1	7.25	15.3	103000	13532.4	6.64	CAEEL	Q09506
#	Filename	z	Score	Spectrum	Variable	Sequence	Sequence Map	Modifications	MH+	MH+	MH+
				Intensity	Sites			Map	Matched	Mass Shift	Error
									(Da)	(Da)	(ppm)
1	CSAKAZAKII24HC.3954.3954.2	2	7.25	49500	M94m	(K)ILQVNGADFTMmTHDRAVK(F)	(K)I L Q V/N G\A D F T/M\m T H D R A V/K(F)	m:Oxidized methionine	2147.07	15.9767	-8.4
2	CSAKAZAKII24HC.3974.3974.2	2	5.61	49500	M93m	(K)ILQVNGADFTmMTHDRAVK(F)	(K)I L Q V/N G\A D F T m M/T H D R A V/K(F)	m:Oxidized methionine	2147.07	15.9767	-8.4
3	CSAKAZAKII24HB.3959.3978.2	2	4.43	53800	M94m	(K)ILQVNGADFTMmTHDRAVK(F)	(K)I L Q V/N G\A D F T M m T/H D R A V K(F)	m:Oxidized methionine	2147.07	15.9766	-8.5
Group	Subgroup	Spectra	Distinct	Distinct	% AA	Total	Protein MW	Protein	Species	Database	Protein Name
(#)	(#)	(#)	Peptides	Summed	Coverage	Protein	(Da)	pI		Accession #
			(#)	MS/MS Search		Spectral
				Score		Intensity
69	69.1	1	1	7.24	10.3	9660	22680.7	5.81	CAEEL	Q17819
#	Filename	z	Score	Spectrum	Variable	Sequence	Sequence Map	Modifications	MH+	MH+	MH+
				Intensity	Sites			Map	Matched	Mass Shift	Error
									(Da)	(Da)	(ppm)
1	CSAKAZAKII24HA.4262.4262.2	2	7.24	9660	M89m	(K)IIASKYSmADAENEVIDFLK(L)	(K)I I A/S/K Y S m A D A E/N E V I D F/L K(L)	m:Oxidized methionine	2257.14	16.0152	8.9
Group	Subgroup	Spectra	Distinct	Distinct	% AA	Total	Protein MW	Protein	Species	Database	Protein Name
(#)	(#)	(#)	Peptides	Summed	Coverage	Protein	(Da)	pI		Accession #
			(#)	MS/MS Search		Spectral
				Score		Intensity
70	70.1	1	1	7.16	2	944	89189.6	5.07	CAEEL	P24612
#	Filename	z	Score	Spectrum	Variable	Sequence	Sequence Map	Modifications	MH+	MH+	MH+
				Intensity	Sites			Map	Matched	Mass Shift	Error
									(Da)	(Da)	(ppm)
1	CSAKAZAKII24HB.3839.3839.3	3	7.16	944		(R)TLSAFDGAMGKAGGNK(D)	(R)T L\S A F/D/G A M/G K A G/G N K(D)		1524.75	-0.0285	-18.7
Group	Subgroup	Spectra	Distinct	Distinct	% AA	Total	Protein MW	Protein	Species	Database	Protein Name
(#)	(#)	(#)	Peptides	Summed	Coverage	Protein	(Da)	pI		Accession #
			(#)	MS/MS Search		Spectral
				Score		Intensity
71	71.1	1	1	7.11	2.7	927	40448.5	10.01	CAEEL	O62258
#	Filename	z	Score	Spectrum	Variable	Sequence	Sequence Map	Modifications	MH+	MH+	MH+
				Intensity	Sites			Map	Matched	Mass Shift	Error
									(Da)	(Da)	(ppm)
1	CSAKAZAKII24HB.3161.3161.3	3	7.11	927		(R)IHVGPNGRSK(A)	(R)I/H\V/G P N G R/S K(A)		1064.6	0.0137	12.9
Group	Subgroup	Spectra	Distinct	Distinct	% AA	Total	Protein MW	Protein	Species	Database	Protein Name
(#)	(#)	(#)	Peptides	Summed	Coverage	Protein	(Da)	pI		Accession #
			(#)	MS/MS Search		Spectral
				Score		Intensity
72	72.1	1	1	7.11	6.1	12200	25041.7	9.33	CAEEL	P91033
#	Filename	z	Score	Spectrum	Variable	Sequence	Sequence Map	Modifications	MH+	MH+	MH+
				Intensity	Sites			Map	Matched	Mass Shift	Error
									(Da)	(Da)	(ppm)
1	CSAKAZAKII24HB.4304.4304.3	3	7.11	12200	M208m	(K)SAmKMKVVQEPTCK(E)	(K)S A m/K M K/V V Q E P T\C/K(E)	C:Carbamidomethylation	1636.82	16.0043	5.7
								m:Oxidized methionine
Group	Subgroup	Spectra	Distinct	Distinct	% AA	Total	Protein MW	Protein	Species	Database	Protein Name
(#)	(#)	(#)	Peptides	Summed	Coverage	Protein	(Da)	pI		Accession #
			(#)	MS/MS Search		Spectral
				Score		Intensity
73	73.1	2	1	7.1	1.4	47900	108004	6.23	CAEEL	Q4TT88
#	Filename	z	Score	Spectrum	Variable	Sequence	Sequence Map	Modifications	MH+	MH+	MH+
				Intensity	Sites			Map	Matched	Mass Shift	Error
									(Da)	(Da)	(ppm)
1	CSAKAZAKII24HB.4297.4321.2	2	7.1	33400	M693m	(K)LLACAREmSEDTLK(S)	(K)L L A C A/R E m S E D T/L/K(S)	C:Carbamidomethylation	1636.8	16.0186	14.3
								m:Oxidized methionine
2	CSAKAZAKII24HA.4311.4311.3	3	3.42	14500	M693m	(K)LLACAREmSEDTLK(S)	(K)L L A C A/R E m S E D T L/K(S)	C:Carbamidomethylation	1636.8	16.0205	15.5
								m:Oxidized methionine
Group	Subgroup	Spectra	Distinct	Distinct	% AA	Total	Protein MW	Protein	Species	Database	Protein Name
(#)	(#)	(#)	Peptides	Summed	Coverage	Protein	(Da)	pI		Accession #
			(#)	MS/MS Search		Spectral
				Score		Intensity
74	74.1	2	1	7.1	2.2	19300	35646.7	9.43	CAEEL	Q7YXD2
#	Filename	z	Score	Spectrum	Variable	Sequence	Sequence Map	Modifications	MH+	MH+	MH+
				Intensity	Sites			Map	Matched	Mass Shift	Error
									(Da)	(Da)	(ppm)
1	CSAKAZAKII24HC.3790.3790.2	2	7.1	10500	M101m	(K)mSIVPPK(A)	(K)m S\I/V/P P K(A)	m:Oxidized methionine	771.443	16.0089	17.8
2	CSAKAZAKII24HA.3781.3781.2	2	5.87	8840	M101m	(K)mSIVPPK(A)	(K)m S\I/V/P P K(A)	m:Oxidized methionine	771.443	16.0099	19
Group	Subgroup	Spectra	Distinct	Distinct	% AA	Total	Protein MW	Protein	Species	Database	Protein Name
(#)	(#)	(#)	Peptides	Summed	Coverage	Protein	(Da)	pI		Accession #
			(#)	MS/MS Search		Spectral
				Score		Intensity
75	75.1	1	1	7.09	4.5	14200	48165.4	8.89	CAEEL	Q95Y05
#	Filename	z	Score	Spectrum	Variable	Sequence	Sequence Map	Modifications	MH+	MH+	MH+
				Intensity	Sites			Map	Matched	Mass Shift	Error
									(Da)	(Da)	(ppm)
1	CSAKAZAKII24HC.4334.4334.3	3	7.09	14200		(K)KHILTEFGFTFMLVDQGYK(T)	(K)K/H I L T E F G F|T|F M L V D Q/G Y/K(T)		2274.16	-0.0213	-9.4
Group	Subgroup	Spectra	Distinct	Distinct	% AA	Total	Protein MW	Protein	Species	Database	Protein Name
(#)	(#)	(#)	Peptides	Summed	Coverage	Protein	(Da)	pI		Accession #
			(#)	MS/MS Search		Spectral
				Score		Intensity
76	76.1	1	1	7.06	2.8	1200	24653.2	10.22	CAEEL	I2HAF8
#	Filename	z	Score	Spectrum	Variable	Sequence	Sequence Map	Modifications	MH+	MH+	MH+
				Intensity	Sites			Map	Matched	Mass Shift	Error
									(Da)	(Da)	(ppm)
1	CSAKAZAKII24HC.2573.2573.2	2	7.06	1200		(R)LITPAR(I)	(R)L I|T/P A/R(I)		670.425	-0.0032	-4.8
Group	Subgroup	Spectra	Distinct	Distinct	% AA	Total	Protein MW	Protein	Species	Database	Protein Name
(#)	(#)	(#)	Peptides	Summed	Coverage	Protein	(Da)	pI		Accession #
			(#)	MS/MS Search		Spectral
				Score		Intensity
77	77.1	1	1	6.89	0.5	21900	254702	9.02	CAEEL	A0A0K3AR10
#	Filename	z	Score	Spectrum	Variable	Sequence	Sequence Map	Modifications	MH+	MH+	MH+
				Intensity	Sites			Map	Matched	Mass Shift	Error
									(Da)	(Da)	(ppm)
1	CSAKAZAKII24HC.4943.4943.2	2	6.89	21900		(K)WIRAEAEKTAK(R)	(K)W/I R A E A E/K T/A K(R)		1302.72	-0.0067	-5.1
Group	Subgroup	Spectra	Distinct	Distinct	% AA	Total	Protein MW	Protein	Species	Database	Protein Name
(#)	(#)	(#)	Peptides	Summed	Coverage	Protein	(Da)	pI		Accession #
			(#)	MS/MS Search		Spectral
				Score		Intensity
78	78.1	2	1	6.88	7.7	25400	20816.7	6.16	CAEEL	A0A0K3ARZ8
#	Filename	z	Score	Spectrum	Variable	Sequence	Sequence Map	Modifications	MH+	MH+	MH+
				Intensity	Sites			Map	Matched	Mass Shift	Error
									(Da)	(Da)	(ppm)
1	CSAKAZAKII24HC.3811.3811.3	3	6.88	14800		(K)DLEKMDSYLESANK(M)	(K)D L E K M D S/Y L/E/S A N/K(M)		1642.76	-0.0268	-16.3
2	CSAKAZAKII24HB.3832.3832.3	3	5.72	10600		(K)DLEKMDSYLESANK(M)	(K)D L E K|M D S/Y L E/S A N/K(M)		1642.76	-0.0298	-18.1
Group	Subgroup	Spectra	Distinct	Distinct	% AA	Total	Protein MW	Protein	Species	Database	Protein Name
(#)	(#)	(#)	Peptides	Summed	Coverage	Protein	(Da)	pI		Accession #
			(#)	MS/MS Search		Spectral
				Score		Intensity
79	79.1	4	1	6.86	0.9	1040000	91269.8	9.37	CAEEL	O61794
#	Filename	z	Score	Spectrum	Variable	Sequence	Sequence Map	Modifications	MH+	MH+	MH+
				Intensity	Sites			Map	Matched	Mass Shift	Error
									(Da)	(Da)	(ppm)
1	CSAKAZAKII24HA.2159.2159.2	2	6.86	253000		(K)ASVNASEK(D)	(K)A S|V N/A S E K(D)		805.405	0.0086	10.7
2	CSAKAZAKII24HC.2147.2147.2	2	6.56	265000		(K)ASVNASEK(D)	(K)A S|V/N/A S E K(D)		805.405	0.0093	11.6
3	CSAKAZAKII24HC.2145.2150.2	2	6.44	265000		(K)ASVNASEK(D)	(K)A S|V N/A S E K(D)		805.405	0.0093	11.6
4	CSAKAZAKII24HA.2155.2155.2	2	3.84	253000		(K)ASVNASEK(D)	(K)A S|V N/A S E K(D)		805.405	0.0086	10.7
Group	Subgroup	Spectra	Distinct	Distinct	% AA	Total	Protein MW	Protein	Species	Database	Protein Name
(#)	(#)	(#)	Peptides	Summed	Coverage	Protein	(Da)	pI		Accession #
			(#)	MS/MS Search		Spectral
				Score		Intensity
80	80.1	1	1	6.72	5.5	47300	24769.6	6.51	CAEEL	Q9XVJ3
#	Filename	z	Score	Spectrum	Variable	Sequence	Sequence Map	Modifications	MH+	MH+	MH+
				Intensity	Sites			Map	Matched	Mass Shift	Error
									(Da)	(Da)	(ppm)
1	CSAKAZAKII24HA.3785.3785.3	3	6.72	47300		(K)ITTENGTSTITPQ(-)	(K)I/T T E\N G T/S T/I T P Q(-)		1362.67	0.0008	0.6
Group	Subgroup	Spectra	Distinct	Distinct	% AA	Total	Protein MW	Protein	Species	Database	Protein Name
(#)	(#)	(#)	Peptides	Summed	Coverage	Protein	(Da)	pI		Accession #
			(#)	MS/MS Search		Spectral
				Score		Intensity
81	81.1	1	1	6.65	5.1	122000	45624.6	9.51	CAEEL	Q8ITY6
#	Filename	z	Score	Spectrum	Variable	Sequence	Sequence Map	Modifications	MH+	MH+	MH+
				Intensity	Sites			Map	Matched	Mass Shift	Error
									(Da)	(Da)	(ppm)
1	CSAKAZAKII24HB.4221.4278.3	3	6.65	122000		(R)LAVSAAFHTRQMESAVEQVAK(A)	(R)L A V S A A F H T\R Q\M|E S/A V E Q V A/K(A)		2273.17	-0.0159	-7
Group	Subgroup	Spectra	Distinct	Distinct	% AA	Total	Protein MW	Protein	Species	Database	Protein Name
(#)	(#)	(#)	Peptides	Summed	Coverage	Protein	(Da)	pI		Accession #
			(#)	MS/MS Search		Spectral
				Score		Intensity
82	82.1	1	1	6.63	6.9	9510	20595.3	9.56	CAEEL	Q27GV2
#	Filename	z	Score	Spectrum	Variable	Sequence	Sequence Map	Modifications	MH+	MH+	MH+
				Intensity	Sites			Map	Matched	Mass Shift	Error
									(Da)	(Da)	(ppm)
1	CSAKAZAKII24HC.4738.4738.3	3	6.63	9510		(K)HVLIRFPNKIIR(T)	(K)H V L\I R F/P N/K I I/R(T)		1505.94	-0.0115	-7.6
Group	Subgroup	Spectra	Distinct	Distinct	% AA	Total	Protein MW	Protein	Species	Database	Protein Name
(#)	(#)	(#)	Peptides	Summed	Coverage	Protein	(Da)	pI		Accession #
			(#)	MS/MS Search		Spectral
				Score		Intensity
83	83.1	1	1	6.58	3.9	30700	42523.7	10.31	CAEEL	Q7YXB5
#	Filename	z	Score	Spectrum	Variable	Sequence	Sequence Map	Modifications	MH+	MH+	MH+
				Intensity	Sites			Map	Matched	Mass Shift	Error
									(Da)	(Da)	(ppm)
1	CSAKAZAKII24HC.4333.4333.2	2	6.58	30700		(R)TSPRYNLSTCVVQK(S)	(R)T S/P R Y N L\S T/C V V Q/K(S)	C:Carbamidomethylation	1652.84	-0.0177	-10.7
Group	Subgroup	Spectra	Distinct	Distinct	% AA	Total	Protein MW	Protein	Species	Database	Protein Name
(#)	(#)	(#)	Peptides	Summed	Coverage	Protein	(Da)	pI		Accession #
			(#)	MS/MS Search		Spectral
				Score		Intensity
84	84.1	1	1	6.48	1.9	16000	48273.5	6.91	CAEEL	P34454
#	Filename	z	Score	Spectrum	Variable	Sequence	Sequence Map	Modifications	MH+	MH+	MH+
				Intensity	Sites			Map	Matched	Mass Shift	Error
									(Da)	(Da)	(ppm)
1	CSAKAZAKII24HB.2909.2909.2	2	6.48	16000		(R)ISEEIGSK(T)	(R)I/S|E E/I G S K(T)		862.452	-0.0118	-13.7
Group	Subgroup	Spectra	Distinct	Distinct	% AA	Total	Protein MW	Protein	Species	Database	Protein Name
(#)	(#)	(#)	Peptides	Summed	Coverage	Protein	(Da)	pI		Accession #
			(#)	MS/MS Search		Spectral
				Score		Intensity
85	85.1	1	1	6.47	0.9	21900	149921	4.91	CAEEL	P34544
#	Filename	z	Score	Spectrum	Variable	Sequence	Sequence Map	Modifications	MH+	MH+	MH+
				Intensity	Sites			Map	Matched	Mass Shift	Error
									(Da)	(Da)	(ppm)
1	CSAKAZAKII24HC.4941.4941.2	2	6.47	21900		(K)AEMKLAIAEAQK(V)	(K)A E|M K L A I A E/A/Q/K(V)		1302.71	0.0012	0.9
Group	Subgroup	Spectra	Distinct	Distinct	% AA	Total	Protein MW	Protein	Species	Database	Protein Name
(#)	(#)	(#)	Peptides	Summed	Coverage	Protein	(Da)	pI		Accession #
			(#)	MS/MS Search		Spectral
				Score		Intensity
86	86.1	1	1	6.35	1	18100	100486	4.58	CAEEL	A0A1I6CMA1
#	Filename	z	Score	Spectrum	Variable	Sequence	Sequence Map	Modifications	MH+	MH+	MH+
				Intensity	Sites			Map	Matched	Mass Shift	Error
									(Da)	(Da)	(ppm)
1	CSAKAZAKII24HC.2273.2273.2	2	6.35	18100		(K)LKSQEDAKK(K)	(K)L/K|S|Q E D\A K K(K)		1046.58	0.0072	6.9
Group	Subgroup	Spectra	Distinct	Distinct	% AA	Total	Protein MW	Protein	Species	Database	Protein Name
(#)	(#)	(#)	Peptides	Summed	Coverage	Protein	(Da)	pI		Accession #
			(#)	MS/MS Search		Spectral
				Score		Intensity
87	87.1	1	1	6.27	0.6	1420	218796	6.52	CAEEL	K7ZUR1
#	Filename	z	Score	Spectrum	Variable	Sequence	Sequence Map	Modifications	MH+	MH+	MH+
				Intensity	Sites			Map	Matched	Mass Shift	Error
									(Da)	(Da)	(ppm)
1	CSAKAZAKII24HB.3840.3840.3	3	6.27	1420		(R)ASQHCMDQIAFSK(H)	(R)A S|Q|H C M/D/Q I A F S K(H)	C:Carbamidomethylation	1522.68	0.0151	9.9
Group	Subgroup	Spectra	Distinct	Distinct	% AA	Total	Protein MW	Protein	Species	Database	Protein Name
(#)	(#)	(#)	Peptides	Summed	Coverage	Protein	(Da)	pI		Accession #
			(#)	MS/MS Search		Spectral
				Score		Intensity
88	88.1	1	1	6.22	1.3	3270	66865	9.84	CAEEL	Q9N534
#	Filename	z	Score	Spectrum	Variable	Sequence	Sequence Map	Modifications	MH+	MH+	MH+
				Intensity	Sites			Map	Matched	Mass Shift	Error
									(Da)	(Da)	(ppm)
1	CSAKAZAKII24HA.3655.3655.2	2	6.22	3270		(K)VADKDVDK(Q)	(K)V/A|D K/D V D/K(Q)		889.462	0.0146	16.4
Group	Subgroup	Spectra	Distinct	Distinct	% AA	Total	Protein MW	Protein	Species	Database	Protein Name
(#)	(#)	(#)	Peptides	Summed	Coverage	Protein	(Da)	pI		Accession #
			(#)	MS/MS Search		Spectral
				Score		Intensity
89	89.1	1	1	6.13	1.8	403000	37978.9	7.82	CAEEL	H2KZ70
#	Filename	z	Score	Spectrum	Variable	Sequence	Sequence Map	Modifications	MH+	MH+	MH+
				Intensity	Sites			Map	Matched	Mass Shift	Error
									(Da)	(Da)	(ppm)
1	CSAKAZAKII24HB.2512.2512.2	2	6.13	403000		(R)LGSNIR(W)	(R)L/G S|N/I/R(W)		659.384	-0.0019	-2.9
Group	Subgroup	Spectra	Distinct	Distinct	% AA	Total	Protein MW	Protein	Species	Database	Protein Name
(#)	(#)	(#)	Peptides	Summed	Coverage	Protein	(Da)	pI		Accession #
			(#)	MS/MS Search		Spectral
				Score		Intensity
90	90.1	1	1	6.11	4.8	10700	48062.5	5.31	CAEEL	Q17431
#	Filename	z	Score	Spectrum	Variable	Sequence	Sequence Map	Modifications	MH+	MH+	MH+
				Intensity	Sites			Map	Matched	Mass Shift	Error
									(Da)	(Da)	(ppm)
1	CSAKAZAKII24HC.3958.3958.4	4	6.11	10700		(K)EAPIIGASSESEDDHADTTKK(S)	(K)E/A P I I G/A\S S E S E D D H|A D T T K K(S)		2201.02	-0.0029	-1.3
Group	Subgroup	Spectra	Distinct	Distinct	% AA	Total	Protein MW	Protein	Species	Database	Protein Name
(#)	(#)	(#)	Peptides	Summed	Coverage	Protein	(Da)	pI		Accession #
			(#)	MS/MS Search		Spectral
				Score		Intensity
91	91.1	1	1	6.11	3.7	10600	46443.1	5.79	CAEEL	Q18680
#	Filename	z	Score	Spectrum	Variable	Sequence	Sequence Map	Modifications	MH+	MH+	MH+
				Intensity	Sites			Map	Matched	Mass Shift	Error
									(Da)	(Da)	(ppm)
1	CSAKAZAKII24HB.3846.3846.3	3	6.11	10600		(K)MSTGAGDSAVYEAVER(G)	(K)M/S T G A/G D S A V/Y E A V E R(G)		1642.74	-0.0046	-2.8
Group	Subgroup	Spectra	Distinct	Distinct	% AA	Total	Protein MW	Protein	Species	Database	Protein Name
(#)	(#)	(#)	Peptides	Summed	Coverage	Protein	(Da)	pI		Accession #
			(#)	MS/MS Search		Spectral
				Score		Intensity
92	92.1	1	1	6.01	2.7	7870	28905.6	4.86	CAEEL	A0A0K3AWR8
#	Filename	z	Score	Spectrum	Variable	Sequence	Sequence Map	Modifications	MH+	MH+	MH+
				Intensity	Sites			Map	Matched	Mass Shift	Error
									(Da)	(Da)	(ppm)
1	CSAKAZAKII24HC.9319.9319.2	2	6.01	7870		(K)LPISLRK(S)	(K)L P/I/S/L R/K(S)		826.551	-0.0007	-0.9
Group	Subgroup	Spectra	Distinct	Distinct	% AA	Total	Protein MW	Protein	Species	Database	Protein Name
(#)	(#)	(#)	Peptides	Summed	Coverage	Protein	(Da)	pI		Accession #
			(#)	MS/MS Search		Spectral
				Score		Intensity
93	93.1	1	1	6.01	2.7	55700	47395.6	5.89	CAEEL	Q22419
#	Filename	z	Score	Spectrum	Variable	Sequence	Sequence Map	Modifications	MH+	MH+	MH+
				Intensity	Sites			Map	Matched	Mass Shift	Error
									(Da)	(Da)	(ppm)
1	CSAKAZAKII24HB.3788.3788.3	3	6.01	55700	M72m	(K)LKGEGVEmENLK(I)	(K)L/K G E\G\V E m/E/N L K(I)	m:Oxidized methionine	1346.7	15.9725	-16.5
Group	Subgroup	Spectra	Distinct	Distinct	% AA	Total	Protein MW	Protein	Species	Database	Protein Name
(#)	(#)	(#)	Peptides	Summed	Coverage	Protein	(Da)	pI		Accession #
			(#)	MS/MS Search		Spectral
				Score		Intensity
94	94.1	1	1	5.98	2.3	7350	94579	7.48	CAEEL	O01978
#	Filename	z	Score	Spectrum	Variable	Sequence	Sequence Map	Modifications	MH+	MH+	MH+
				Intensity	Sites			Map	Matched	Mass Shift	Error
									(Da)	(Da)	(ppm)
1	CSAKAZAKII24HA.3971.3971.3	3	5.98	7350	M457m M463m	(R)KLGHHGLSAmISTSNmNQDK(F)	(R)K L/G/H H G L S A/m I S T S N m N Q D|K(F)	m:Oxidized methionine	2169.05	31.9522	-17.1
Group	Subgroup	Spectra	Distinct	Distinct	% AA	Total	Protein MW	Protein	Species	Database	Protein Name
(#)	(#)	(#)	Peptides	Summed	Coverage	Protein	(Da)	pI		Accession #
			(#)	MS/MS Search		Spectral
				Score		Intensity
95	95.1	1	1	5.93	2	1180	53939.5	4.21	CAEEL	P49595
#	Filename	z	Score	Spectrum	Variable	Sequence	Sequence Map	Modifications	MH+	MH+	MH+
				Intensity	Sites			Map	Matched	Mass Shift	Error
									(Da)	(Da)	(ppm)
1	CSAKAZAKII24HC.3569.3569.2	2	5.93	1180		(K)VIVANAGDSR(A)	(K)V I V/A|N A G/D S/R(A)		1001.54	0.0102	10.2
Group	Subgroup	Spectra	Distinct	Distinct	% AA	Total	Protein MW	Protein	Species	Database	Protein Name
(#)	(#)	(#)	Peptides	Summed	Coverage	Protein	(Da)	pI		Accession #
			(#)	MS/MS Search		Spectral
				Score		Intensity
96	96.1	1	1	5.93	1.8	36600	72898.9	8.89	CAEEL	Q03564
#	Filename	z	Score	Spectrum	Variable	Sequence	Sequence Map	Modifications	MH+	MH+	MH+
				Intensity	Sites			Map	Matched	Mass Shift	Error
									(Da)	(Da)	(ppm)
1	CSAKAZAKII24HC.4653.4653.3	3	5.93	36600		(K)LTPEGKTGILKR(S)	(K)L T P E\G K T G/I L K R(S)		1312.8	0.0035	2.7
Group	Subgroup	Spectra	Distinct	Distinct	% AA	Total	Protein MW	Protein	Species	Database	Protein Name
(#)	(#)	(#)	Peptides	Summed	Coverage	Protein	(Da)	pI		Accession #
			(#)	MS/MS Search		Spectral
				Score		Intensity
97	97.1	1	1	5.92	0.8	35800	68881.6	6.11	CAEEL	G1K108
#	Filename	z	Score	Spectrum	Variable	Sequence	Sequence Map	Modifications	MH+	MH+	MH+
				Intensity	Sites			Map	Matched	Mass Shift	Error
									(Da)	(Da)	(ppm)
1	CSAKAZAKII24HC.2860.2860.2	2	5.92	35800		(R)LDQLR(K)	(R)L/D|Q/L R(K)		644.373	-0.0018	-2.8
Group	Subgroup	Spectra	Distinct	Distinct	% AA	Total	Protein MW	Protein	Species	Database	Protein Name
(#)	(#)	(#)	Peptides	Summed	Coverage	Protein	(Da)	pI		Accession #
			(#)	MS/MS Search		Spectral
				Score		Intensity
98	98.1	1	1	5.86	5.1	10600	30976.8	5.31	CAEEL	P91061
#	Filename	z	Score	Spectrum	Variable	Sequence	Sequence Map	Modifications	MH+	MH+	MH+
				Intensity	Sites			Map	Matched	Mass Shift	Error
									(Da)	(Da)	(ppm)
1	CSAKAZAKII24HB.3316.3316.3	3	5.86	10600		(R)QGHLTDPGNFECAK(V)	(R)Q G/H/L T/D/P/G N\F\E C A K(V)	C:Carbamidomethylation	1573.71	-0.0014	-0.9
Group	Subgroup	Spectra	Distinct	Distinct	% AA	Total	Protein MW	Protein	Species	Database	Protein Name
(#)	(#)	(#)	Peptides	Summed	Coverage	Protein	(Da)	pI		Accession #
			(#)	MS/MS Search		Spectral
				Score		Intensity
99	99.1	1	1	5.83	1.8	4680	86886	9.57	CAEEL	Q21026
#	Filename	z	Score	Spectrum	Variable	Sequence	Sequence Map	Modifications	MH+	MH+	MH+
				Intensity	Sites			Map	Matched	Mass Shift	Error
									(Da)	(Da)	(ppm)
1	CSAKAZAKII24HB.3467.3467.4	4	5.83	4680	M1m	(-)mGIAAESKQQSKLLK(A)	(-)m G\I|A/A E/S K Q Q S K L L K(A)	m:Oxidized methionine	1631.91	15.9768	-11
Group	Subgroup	Spectra	Distinct	Distinct	% AA	Total	Protein MW	Protein	Species	Database	Protein Name
(#)	(#)	(#)	Peptides	Summed	Coverage	Protein	(Da)	pI		Accession #
			(#)	MS/MS Search		Spectral
				Score		Intensity
100	100.1	1	1	5.83	3	9450	49490	6.02	CAEEL	Q21037
#	Filename	z	Score	Spectrum	Variable	Sequence	Sequence Map	Modifications	MH+	MH+	MH+
				Intensity	Sites			Map	Matched	Mass Shift	Error
									(Da)	(Da)	(ppm)
1	CSAKAZAKII24HC.4631.4631.2	2	5.83	9450		(R)ATVQPSAAVPVKK(S)	(R)A T/V Q P S A/A V P V K/K(S)		1295.77	0.0041	3.2
Group	Subgroup	Spectra	Distinct	Distinct	% AA	Total	Protein MW	Protein	Species	Database	Protein Name
(#)	(#)	(#)	Peptides	Summed	Coverage	Protein	(Da)	pI		Accession #
			(#)	MS/MS Search		Spectral
				Score		Intensity
101	101.1	1	1	5.78	2.7	2130	57696.9	5.52	CAEEL	P46561
#	Filename	z	Score	Spectrum	Variable	Sequence	Sequence Map	Modifications	MH+	MH+	MH+
				Intensity	Sites			Map	Matched	Mass Shift	Error
									(Da)	(Da)	(ppm)
1	CSAKAZAKII24HB.3916.3916.3	3	5.78	2130		(R)LILEVSQHLGDNVVR(C)	(R)L I|L/E|V S Q H L\G D N\V V\R(C)		1691.94	-0.0184	-10.9
Group	Subgroup	Spectra	Distinct	Distinct	% AA	Total	Protein MW	Protein	Species	Database	Protein Name
(#)	(#)	(#)	Peptides	Summed	Coverage	Protein	(Da)	pI		Accession #
			(#)	MS/MS Search		Spectral
				Score		Intensity
102	102.1	1	1	5.76	2.1	99900	37959.1	9.98	CAEEL	F5GU62
#	Filename	z	Score	Spectrum	Variable	Sequence	Sequence Map	Modifications	MH+	MH+	MH+
				Intensity	Sites			Map	Matched	Mass Shift	Error
									(Da)	(Da)	(ppm)
1	CSAKAZAKII24HB.2219.2219.2	2	5.76	99900		(R)SAKEESR(L)	(R)S A|K E E/S/R(L)		806.4	0.0003	0.4
Group	Subgroup	Spectra	Distinct	Distinct	% AA	Total	Protein MW	Protein	Species	Database	Protein Name
(#)	(#)	(#)	Peptides	Summed	Coverage	Protein	(Da)	pI		Accession #
			(#)	MS/MS Search		Spectral
				Score		Intensity
103	103.1	1	1	5.76	1.4	6220	78094	7.74	CAEEL	Q86NJ9
#	Filename	z	Score	Spectrum	Variable	Sequence	Sequence Map	Modifications	MH+	MH+	MH+
				Intensity	Sites			Map	Matched	Mass Shift	Error
									(Da)	(Da)	(ppm)
1	CSAKAZAKII24HB.3991.3991.2	2	5.76	6220		(K)GDPAAGSGNK(G)	(K)G/D P A A G/S G N K(G)		873.406	-0.013	-14.9
Group	Subgroup	Spectra	Distinct	Distinct	% AA	Total	Protein MW	Protein	Species	Database	Protein Name
(#)	(#)	(#)	Peptides	Summed	Coverage	Protein	(Da)	pI		Accession #
			(#)	MS/MS Search		Spectral
				Score		Intensity
104	104.1	2	1	5.76	1.8	45200	78385	9.23	CAEEL	Q8MNV7
#	Filename	z	Score	Spectrum	Variable	Sequence	Sequence Map	Modifications	MH+	MH+	MH+
				Intensity	Sites			Map	Matched	Mass Shift	Error
									(Da)	(Da)	(ppm)
1	CSAKAZAKII24HC.4307.4307.2	2	5.76	30700		(K)YRTIIFDESHMLK(D)	(K)Y/R T I I/F D/E S H M/L/K(D)		1652.85	-0.0218	-13.2
2	CSAKAZAKII24HA.4325.4325.3	3	3.56	14500		(K)YRTIIFDESHMLK(D)	(K)Y R T/I I/F D E S/H M L/K(D)		1652.85	-0.0227	-13.7
Group	Subgroup	Spectra	Distinct	Distinct	% AA	Total	Protein MW	Protein	Species	Database	Protein Name
(#)	(#)	(#)	Peptides	Summed	Coverage	Protein	(Da)	pI		Accession #
			(#)	MS/MS Search		Spectral
				Score		Intensity
105	105.1	1	1	5.76	0.9	25200	110130	8.96	CAEEL	Q95YF1
#	Filename	z	Score	Spectrum	Variable	Sequence	Sequence Map	Modifications	MH+	MH+	MH+
				Intensity	Sites			Map	Matched	Mass Shift	Error
									(Da)	(Da)	(ppm)
1	CSAKAZAKII24HB.2286.2286.3	3	5.76	25200		(R)SKKMTEVPK(V)	(R)S K K\M\T|E/V\P K(V)		1047.59	0.0076	7.2
Group	Subgroup	Spectra	Distinct	Distinct	% AA	Total	Protein MW	Protein	Species	Database	Protein Name
(#)	(#)	(#)	Peptides	Summed	Coverage	Protein	(Da)	pI		Accession #
			(#)	MS/MS Search		Spectral
				Score		Intensity
106	106.1	1	1	5.69	4.5	1930	28601.3	9.81	CAEEL	C7IVR7
#	Filename	z	Score	Spectrum	Variable	Sequence	Sequence Map	Modifications	MH+	MH+	MH+
				Intensity	Sites			Map	Matched	Mass Shift	Error
									(Da)	(Da)	(ppm)
1	CSAKAZAKII24HA.3072.3072.3	3	5.69	1930	M192m	(K)VImHLLNRVSK(R)	(K)V I\m/H L L N/R V S/K(R)	m:Oxidized methionine	1309.78	15.9738	-15.9
Group	Subgroup	Spectra	Distinct	Distinct	% AA	Total	Protein MW	Protein	Species	Database	Protein Name
(#)	(#)	(#)	Peptides	Summed	Coverage	Protein	(Da)	pI		Accession #
			(#)	MS/MS Search		Spectral
				Score		Intensity
107	107.1	1	1	5.68	2.8	3650	30816.4	5.49	CAEEL	P46769
#	Filename	z	Score	Spectrum	Variable	Sequence	Sequence Map	Modifications	MH+	MH+	MH+
				Intensity	Sites			Map	Matched	Mass Shift	Error
									(Da)	(Da)	(ppm)
1	CSAKAZAKII24HA.3529.3529.2	2	5.68	3650		(R)LLVISDPR(I)	(R)L L|V/I S D/P R(I)		912.551	-0.0011	-1.2
Group	Subgroup	Spectra	Distinct	Distinct	% AA	Total	Protein MW	Protein	Species	Database	Protein Name
(#)	(#)	(#)	Peptides	Summed	Coverage	Protein	(Da)	pI		Accession #
			(#)	MS/MS Search		Spectral
				Score		Intensity
108	108.1	1	1	5.66	4.7	18100	29277.8	9.15	CAEEL	Q9N4C7
#	Filename	z	Score	Spectrum	Variable	Sequence	Sequence Map	Modifications	MH+	MH+	MH+
				Intensity	Sites			Map	Matched	Mass Shift	Error
									(Da)	(Da)	(ppm)
1	CSAKAZAKII24HB.3869.3886.2	2	5.66	18100		(R)EGPKLIDEFEEK(E)	(R)E G P K|L I/D E/F E E/K(E)		1433.72	-0.0019	-1.3
Group	Subgroup	Spectra	Distinct	Distinct	% AA	Total	Protein MW	Protein	Species	Database	Protein Name
(#)	(#)	(#)	Peptides	Summed	Coverage	Protein	(Da)	pI		Accession #
			(#)	MS/MS Search		Spectral
				Score		Intensity
109	109.1	1	1	5.56	1.1	11900	95039.4	9.07	CAEEL	Q23141
#	Filename	z	Score	Spectrum	Variable	Sequence	Sequence Map	Modifications	MH+	MH+	MH+
				Intensity	Sites			Map	Matched	Mass Shift	Error
									(Da)	(Da)	(ppm)
1	CSAKAZAKII24HA.3369.3369.3	3	5.56	11900		(K)DFKNYDDFK(I)	(K)D F/K/N Y D/D\F K(I)		1191.53	-0.0155	-13
Group	Subgroup	Spectra	Distinct	Distinct	% AA	Total	Protein MW	Protein	Species	Database	Protein Name
(#)	(#)	(#)	Peptides	Summed	Coverage	Protein	(Da)	pI		Accession #
			(#)	MS/MS Search		Spectral
				Score		Intensity
110	110.1	1	1	5.56	2.7	26100	59968.5	9.35	CAEEL	Q93834
#	Filename	z	Score	Spectrum	Variable	Sequence	Sequence Map	Modifications	MH+	MH+	MH+
				Intensity	Sites			Map	Matched	Mass Shift	Error
									(Da)	(Da)	(ppm)
1	CSAKAZAKII24HC.3878.3878.2	2	5.56	26100		(R)NQASAMTDCLLQYK(E)	(R)N\Q|A S A M T D/C L/L Q Y/K(E)	C:Carbamidomethylation	1642.76	-0.0215	-13.1
Group	Subgroup	Spectra	Distinct	Distinct	% AA	Total	Protein MW	Protein	Species	Database	Protein Name
(#)	(#)	(#)	Peptides	Summed	Coverage	Protein	(Da)	pI		Accession #
			(#)	MS/MS Search		Spectral
				Score		Intensity
111	111.1	1	1	5.56	3.4	27300	61886.5	6.33	CAEEL	Q9BIB7
#	Filename	z	Score	Spectrum	Variable	Sequence	Sequence Map	Modifications	MH+	MH+	MH+
				Intensity	Sites			Map	Matched	Mass Shift	Error
									(Da)	(Da)	(ppm)
1	CSAKAZAKII24HC.5078.5078.2	2	5.56	27300	M332m	(R)mPDPRDSRALSDPYAAESR(Y)	(R)m P D P R/D S R A L S/D P/Y A/A E|S R(Y)	m:Oxidized methionine	2134	16.0215	12.4
Group	Subgroup	Spectra	Distinct	Distinct	% AA	Total	Protein MW	Protein	Species	Database	Protein Name
(#)	(#)	(#)	Peptides	Summed	Coverage	Protein	(Da)	pI		Accession #
			(#)	MS/MS Search		Spectral
				Score		Intensity
112	112.1	1	1	5.55	1.2	8450	81594.8	6.04	CAEEL	Q22145
#	Filename	z	Score	Spectrum	Variable	Sequence	Sequence Map	Modifications	MH+	MH+	MH+
				Intensity	Sites			Map	Matched	Mass Shift	Error
									(Da)	(Da)	(ppm)
1	CSAKAZAKII24HA.3705.3705.2	2	5.55	8450		(K)DGVRDLASK(Y)	(K)D/G/V R D/L A S/K(Y)		960.511	0.0084	8.8
Group	Subgroup	Spectra	Distinct	Distinct	% AA	Total	Protein MW	Protein	Species	Database	Protein Name
(#)	(#)	(#)	Peptides	Summed	Coverage	Protein	(Da)	pI		Accession #
			(#)	MS/MS Search		Spectral
				Score		Intensity
113	113.1	1	1	5.52	0.9	1600	152209	4.71	CAEEL	D0Z5P0
#	Filename	z	Score	Spectrum	Variable	Sequence	Sequence Map	Modifications	MH+	MH+	MH+
				Intensity	Sites			Map	Matched	Mass Shift	Error
									(Da)	(Da)	(ppm)
1	CSAKAZAKII24HB.7653.7653.3	3	5.52	1600		(K)LNNEIKILKLQLR(E)	(K)L N/N E I K I\L K/L Q L R(E)		1595	0.0124	7.8
Group	Subgroup	Spectra	Distinct	Distinct	% AA	Total	Protein MW	Protein	Species	Database	Protein Name
(#)	(#)	(#)	Peptides	Summed	Coverage	Protein	(Da)	pI		Accession #
			(#)	MS/MS Search		Spectral
				Score		Intensity
114	114.1	1	1	5.48	4	1830	19640.2	9.49	CAEEL	O61822
#	Filename	z	Score	Spectrum	Variable	Sequence	Sequence Map	Modifications	MH+	MH+	MH+
				Intensity	Sites			Map	Matched	Mass Shift	Error
									(Da)	(Da)	(ppm)
1	CSAKAZAKII24HC.3288.3288.2	2	5.48	1830		(R)NLSNLVR(N)	(R)N/L/S/N\L/V R(N)		815.473	-0.0144	-17.7
Group	Subgroup	Spectra	Distinct	Distinct	% AA	Total	Protein MW	Protein	Species	Database	Protein Name
(#)	(#)	(#)	Peptides	Summed	Coverage	Protein	(Da)	pI		Accession #
			(#)	MS/MS Search		Spectral
				Score		Intensity
115	115.1	1	1	5.43	0.6	4530	204526	6.34	CAEEL	G5EEV7
#	Filename	z	Score	Spectrum	Variable	Sequence	Sequence Map	Modifications	MH+	MH+	MH+
				Intensity	Sites			Map	Matched	Mass Shift	Error
									(Da)	(Da)	(ppm)
1	CSAKAZAKII24HA.3576.3576.3	3	5.43	4530		(R)SFLLAQRVMSK(F)	(R)S F L L/A/Q/R|V/M S\K(F)		1279.72	0.0179	14
Group	Subgroup	Spectra	Distinct	Distinct	% AA	Total	Protein MW	Protein	Species	Database	Protein Name
(#)	(#)	(#)	Peptides	Summed	Coverage	Protein	(Da)	pI		Accession #
			(#)	MS/MS Search		Spectral
				Score		Intensity
116	116.1	2	1	5.38	1.4	4480	71024.6	5.48	CAEEL	Q21374
#	Filename	z	Score	Spectrum	Variable	Sequence	Sequence Map	Modifications	MH+	MH+	MH+
				Intensity	Sites			Map	Matched	Mass Shift	Error
									(Da)	(Da)	(ppm)
1	CSAKAZAKII24HB.2935.2935.2	2	5.38	1800		(R)NTLSDENLK(M)	(R)N T L S/D E/N L K(M)		1033.52	-0.0038	-3.7
2	CSAKAZAKII24HC.2924.2924.2	2	4.22	2680		(R)NTLSDENLK(M)	(R)N T|L/S D\E/N L/K(M)		1033.52	-0.0055	-5.3
Group	Subgroup	Spectra	Distinct	Distinct	% AA	Total	Protein MW	Protein	Species	Database	Protein Name
(#)	(#)	(#)	Peptides	Summed	Coverage	Protein	(Da)	pI		Accession #
			(#)	MS/MS Search		Spectral
				Score		Intensity
117	117.1	1	1	5.35	7.6	1730	13591.5	11.82	CAEEL	O45499
#	Filename	z	Score	Spectrum	Variable	Sequence	Sequence Map	Modifications	MH+	MH+	MH+
				Intensity	Sites			Map	Matched	Mass Shift	Error
									(Da)	(Da)	(ppm)
1	CSAKAZAKII24HB.3081.3081.2	2	5.35	1730		(R)NIVEAAAVR(D)	(R)N I|V|E\A A A V R(D)		942.537	-0.01	-10.6
Group	Subgroup	Spectra	Distinct	Distinct	% AA	Total	Protein MW	Protein	Species	Database	Protein Name
(#)	(#)	(#)	Peptides	Summed	Coverage	Protein	(Da)	pI		Accession #
			(#)	MS/MS Search		Spectral
				Score		Intensity
118	118.1	1	1	5.35	0.6	10200	307594	5.32	CAEEL	Q5F4W0
#	Filename	z	Score	Spectrum	Variable	Sequence	Sequence Map	Modifications	MH+	MH+	MH+
				Intensity	Sites			Map	Matched	Mass Shift	Error
									(Da)	(Da)	(ppm)
1	CSAKAZAKII24HA.4164.4164.3	3	5.35	10200		(R)CSIEIIDANDNAPVFSRSR(Y)	(R)C S I E I I/D A N/D N A/P V\F/S/R S R(Y)	C:Carbamidomethylation	2164.05	-0.0104	-4.8
Group	Subgroup	Spectra	Distinct	Distinct	% AA	Total	Protein MW	Protein	Species	Database	Protein Name
(#)	(#)	(#)	Peptides	Summed	Coverage	Protein	(Da)	pI		Accession #
			(#)	MS/MS Search		Spectral
				Score		Intensity
119	119.1	2	1	5.31	3.9	17500	29865.5	9.33	CAEEL	Q23142
#	Filename	z	Score	Spectrum	Variable	Sequence	Sequence Map	Modifications	MH+	MH+	MH+
				Intensity	Sites			Map	Matched	Mass Shift	Error
									(Da)	(Da)	(ppm)
1	CSAKAZAKII24HC.4247.4247.2	2	5.31	7960		(K)VEAYKTCSDK(L)	(K)V/E A Y K T C S D/K(L)	C:Carbamidomethylation	1200.56	-0.0086	-7.2
2	CSAKAZAKII24HA.4260.4260.2	2	3.71	9560		(K)VEAYKTCSDK(L)	(K)V/E A Y K T C S D|K(L)	C:Carbamidomethylation	1200.56	-0.0063	-5.3
Group	Subgroup	Spectra	Distinct	Distinct	% AA	Total	Protein MW	Protein	Species	Database	Protein Name
(#)	(#)	(#)	Peptides	Summed	Coverage	Protein	(Da)	pI		Accession #
			(#)	MS/MS Search		Spectral
				Score		Intensity
120	120.1	1	1	5.3	4.2	1370	32336.3	9.86	CAEEL	A0A3P6MYB5
#	Filename	z	Score	Spectrum	Variable	Sequence	Sequence Map	Modifications	MH+	MH+	MH+
				Intensity	Sites			Map	Matched	Mass Shift	Error
									(Da)	(Da)	(ppm)
1	CSAKAZAKII24HA.3598.3598.2	2	5.3	1370		(R)ARAAIIAAQGEK(D)	(R)A R A A\I I/A A Q G E K(D)		1198.69	-0.0021	-1.7
Group	Subgroup	Spectra	Distinct	Distinct	% AA	Total	Protein MW	Protein	Species	Database	Protein Name
(#)	(#)	(#)	Peptides	Summed	Coverage	Protein	(Da)	pI		Accession #
			(#)	MS/MS Search		Spectral
				Score		Intensity
121	121.1	1	1	5.26	1.9	2940	52967.9	6.45	CAEEL	Q09579
#	Filename	z	Score	Spectrum	Variable	Sequence	Sequence Map	Modifications	MH+	MH+	MH+
				Intensity	Sites			Map	Matched	Mass Shift	Error
									(Da)	(Da)	(ppm)
1	CSAKAZAKII24HC.3138.3138.2	2	5.26	2940		(K)EKAAAIALK(T)	(K)E K A/A/A\I/A/L K(T)		914.567	-0.0027	-3
Group	Subgroup	Spectra	Distinct	Distinct	% AA	Total	Protein MW	Protein	Species	Database	Protein Name
(#)	(#)	(#)	Peptides	Summed	Coverage	Protein	(Da)	pI		Accession #
			(#)	MS/MS Search		Spectral
				Score		Intensity
122	122.1	1	1	5.25	0.8	92000	96601	5.38	CAEEL	A5Z2T6
#	Filename	z	Score	Spectrum	Variable	Sequence	Sequence Map	Modifications	MH+	MH+	MH+
				Intensity	Sites			Map	Matched	Mass Shift	Error
									(Da)	(Da)	(ppm)
1	CSAKAZAKII24HC.2210.2210.2	2	5.25	92000		(R)GTPEQFK(A)	(R)G T|P/E/Q F K(A)		806.404	-0.0049	-6.1
Group	Subgroup	Spectra	Distinct	Distinct	% AA	Total	Protein MW	Protein	Species	Database	Protein Name
(#)	(#)	(#)	Peptides	Summed	Coverage	Protein	(Da)	pI		Accession #
			(#)	MS/MS Search		Spectral
				Score		Intensity
123	123.1	1	1	5.22	1.5	11000	136188	9.04	CAEEL	D7SFK4
#	Filename	z	Score	Spectrum	Variable	Sequence	Sequence Map	Modifications	MH+	MH+	MH+
				Intensity	Sites			Map	Matched	Mass Shift	Error
									(Da)	(Da)	(ppm)
1	CSAKAZAKII24HC.3859.3859.3	3	5.22	11000		(K)NSGGGSGGSGGSGGSRAYK(T)	(K)N\S G/G G/S G G S G G/S|G G/S/R A Y K(T)		1599.71	0.0075	4.7
Group	Subgroup	Spectra	Distinct	Distinct	% AA	Total	Protein MW	Protein	Species	Database	Protein Name
(#)	(#)	(#)	Peptides	Summed	Coverage	Protein	(Da)	pI		Accession #
			(#)	MS/MS Search		Spectral
				Score		Intensity
124	124.1	1	1	5.11	1.8	20600	67170.3	8.57	CAEEL	Q9U2C4
#	Filename	z	Score	Spectrum	Variable	Sequence	Sequence Map	Modifications	MH+	MH+	MH+
				Intensity	Sites			Map	Matched	Mass Shift	Error
									(Da)	(Da)	(ppm)
1	CSAKAZAKII24HB.3775.3775.2	2	5.11	20600		(K)KWFMNVHASDK(I)	(K)K\W F M N/V H/A/S D K(I)		1362.66	0.0087	6.4
Group	Subgroup	Spectra	Distinct	Distinct	% AA	Total	Protein MW	Protein	Species	Database	Protein Name
(#)	(#)	(#)	Peptides	Summed	Coverage	Protein	(Da)	pI		Accession #
			(#)	MS/MS Search		Spectral
				Score		Intensity
125	125.1	1	1	5.08	0.4	68500	164445	7.19	CAEEL	G5EDU3
#	Filename	z	Score	Spectrum	Variable	Sequence	Sequence Map	Modifications	MH+	MH+	MH+
				Intensity	Sites			Map	Matched	Mass Shift	Error
									(Da)	(Da)	(ppm)
1	CSAKAZAKII24HB.2565.2565.2	2	5.08	68500		(K)NGSVKR(V)	(K)N/G S|V K|R(V)		660.379	-0.0125	-19
Group	Subgroup	Spectra	Distinct	Distinct	% AA	Total	Protein MW	Protein	Species	Database	Protein Name
(#)	(#)	(#)	Peptides	Summed	Coverage	Protein	(Da)	pI		Accession #
			(#)	MS/MS Search		Spectral
				Score		Intensity
126	126.1	1	1	5.08	5.4	120000	40860	5.86	CAEEL	Q17930
#	Filename	z	Score	Spectrum	Variable	Sequence	Sequence Map	Modifications	MH+	MH+	MH+
				Intensity	Sites			Map	Matched	Mass Shift	Error
									(Da)	(Da)	(ppm)
1	CSAKAZAKII24HA.4354.4354.3	3	5.08	120000		(K)CSSLHDEMISKQCQPVLLK(L)	(K)C S S L H D\E\M\I|S K Q C Q P V L/L/K(L)	C:Carbamidomethylation	2273.11	0.0438	19.3
Group	Subgroup	Spectra	Distinct	Distinct	% AA	Total	Protein MW	Protein	Species	Database	Protein Name
(#)	(#)	(#)	Peptides	Summed	Coverage	Protein	(Da)	pI		Accession #
			(#)	MS/MS Search		Spectral
				Score		Intensity
127	127.1	1	1	5.05	1.8	4720	83901.3	5.91	CAEEL	O01514
#	Filename	z	Score	Spectrum	Variable	Sequence	Sequence Map	Modifications	MH+	MH+	MH+
				Intensity	Sites			Map	Matched	Mass Shift	Error
									(Da)	(Da)	(ppm)
1	CSAKAZAKII24HA.3322.3322.2	2	5.05	4720	M315m	(K)SYENTITMmAPDGK(V)	(K)S Y E N T/I T M\m A|P D G/K(V)	m:Oxidized methionine	1557.69	16.009	9
Group	Subgroup	Spectra	Distinct	Distinct	% AA	Total	Protein MW	Protein	Species	Database	Protein Name
(#)	(#)	(#)	Peptides	Summed	Coverage	Protein	(Da)	pI		Accession #
			(#)	MS/MS Search		Spectral
				Score		Intensity
128	128.1	1	1	5.05	1.7	1350	46291.1	8.47	CAEEL	Q7JP68
#	Filename	z	Score	Spectrum	Variable	Sequence	Sequence Map	Modifications	MH+	MH+	MH+
				Intensity	Sites			Map	Matched	Mass Shift	Error
									(Da)	(Da)	(ppm)
1	CSAKAZAKII24HB.2928.2928.2	2	5.05	1350		(R)VELARDK(I)	(R)V E L/A/R/D K(I)		830.473	-0.0163	-19.6
Group	Subgroup	Spectra	Distinct	Distinct	% AA	Total	Protein MW	Protein	Species	Database	Protein Name
(#)	(#)	(#)	Peptides	Summed	Coverage	Protein	(Da)	pI		Accession #
			(#)	MS/MS Search		Spectral
				Score		Intensity
129	129.1	1	1	5.02	3.4	11900	32418.1	9.5	CAEEL	G5EDV3
#	Filename	z	Score	Spectrum	Variable	Sequence	Sequence Map	Modifications	MH+	MH+	MH+
				Intensity	Sites			Map	Matched	Mass Shift	Error
									(Da)	(Da)	(ppm)
1	CSAKAZAKII24HA.3394.3394.3	3	5.02	11900		(R)QTRDQDGDEK(D)	(R)Q T R/D Q|D/G\D E\K(D)		1191.52	-0.0074	-6.2
Group	Subgroup	Spectra	Distinct	Distinct	% AA	Total	Protein MW	Protein	Species	Database	Protein Name
(#)	(#)	(#)	Peptides	Summed	Coverage	Protein	(Da)	pI		Accession #
			(#)	MS/MS Search		Spectral
				Score		Intensity
130	130.1	1	1	4.97	3	2420	50987	9.04	CAEEL	G5ECJ3
#	Filename	z	Score	Spectrum	Variable	Sequence	Sequence Map	Modifications	MH+	MH+	MH+
				Intensity	Sites			Map	Matched	Mass Shift	Error
									(Da)	(Da)	(ppm)
1	CSAKAZAKII24HB.3972.3972.2	2	4.97	2420		(K)NDSDIMFVSATSK(N)	(K)N D S D I M\F\V S A/T S K(N)		1414.65	0.0148	10.5
Group	Subgroup	Spectra	Distinct	Distinct	% AA	Total	Protein MW	Protein	Species	Database	Protein Name
(#)	(#)	(#)	Peptides	Summed	Coverage	Protein	(Da)	pI		Accession #
			(#)	MS/MS Search		Spectral
				Score		Intensity
131	131.1	1	1	4.93	2.8	1350	23809.2	11.19	CAEEL	P91128
#	Filename	z	Score	Spectrum	Variable	Sequence	Sequence Map	Modifications	MH+	MH+	MH+
				Intensity	Sites			Map	Matched	Mass Shift	Error
									(Da)	(Da)	(ppm)
1	CSAKAZAKII24HA.4206.4206.2	2	4.93	1350		(K)LILFPK(K)	(K)L/I/L|F/P K(K)		730.486	-0.0016	-2.1
Group	Subgroup	Spectra	Distinct	Distinct	% AA	Total	Protein MW	Protein	Species	Database	Protein Name
(#)	(#)	(#)	Peptides	Summed	Coverage	Protein	(Da)	pI		Accession #
			(#)	MS/MS Search		Spectral
				Score		Intensity
132	132.1	1	1	4.89	2.7	44900	54323	9.43	CAEEL	Q11179
#	Filename	z	Score	Spectrum	Variable	Sequence	Sequence Map	Modifications	MH+	MH+	MH+
				Intensity	Sites			Map	Matched	Mass Shift	Error
									(Da)	(Da)	(ppm)
1	CSAKAZAKII24HB.5309.5309.3	3	4.89	44900		(R)SLSSLEDYPEGQK(M)	(R)S L/S\S/L E D Y\P E G Q K(M)		1452.68	0.0231	15.9
Group	Subgroup	Spectra	Distinct	Distinct	% AA	Total	Protein MW	Protein	Species	Database	Protein Name
(#)	(#)	(#)	Peptides	Summed	Coverage	Protein	(Da)	pI		Accession #
			(#)	MS/MS Search		Spectral
				Score		Intensity
133	133.1	1	1	4.87	3.8	7710	37131.9	9.04	CAEEL	Q19584
#	Filename	z	Score	Spectrum	Variable	Sequence	Sequence Map	Modifications	MH+	MH+	MH+
				Intensity	Sites			Map	Matched	Mass Shift	Error
									(Da)	(Da)	(ppm)
1	CSAKAZAKII24HA.3936.3936.3	3	4.87	7710		(K)EASKAGQPSNVFR(G)	(K)E A S K\A|G Q P S/N V F R(G)		1390.71	-0.0047	-3.4
Group	Subgroup	Spectra	Distinct	Distinct	% AA	Total	Protein MW	Protein	Species	Database	Protein Name
(#)	(#)	(#)	Peptides	Summed	Coverage	Protein	(Da)	pI		Accession #
			(#)	MS/MS Search		Spectral
				Score		Intensity
134	134.1	1	1	4.84	3.9	1800	27427.8	6.67	CAEEL	Q7YWY4
#	Filename	z	Score	Spectrum	Variable	Sequence	Sequence Map	Modifications	MH+	MH+	MH+
				Intensity	Sites			Map	Matched	Mass Shift	Error
									(Da)	(Da)	(ppm)
1	CSAKAZAKII24HB.2942.2942.2	2	4.84	1800		(R)DVAKNFPDK(L)	(R)D V|A K N F P/D K(L)		1033.53	-0.019	-18.4
Group	Subgroup	Spectra	Distinct	Distinct	% AA	Total	Protein MW	Protein	Species	Database	Protein Name
(#)	(#)	(#)	Peptides	Summed	Coverage	Protein	(Da)	pI		Accession #
			(#)	MS/MS Search		Spectral
				Score		Intensity
135	135.1	1	1	4.79	2	89600	37952.6	6.39	CAEEL	Q22031
#	Filename	z	Score	Spectrum	Variable	Sequence	Sequence Map	Modifications	MH+	MH+	MH+
				Intensity	Sites			Map	Matched	Mass Shift	Error
									(Da)	(Da)	(ppm)
1	CSAKAZAKII24HA.2089.2089.2	2	4.79	89600		(K)MSADLNR(Q)	(K)M|S A D L/N\R(Q)		806.383	0.0137	17
Group	Subgroup	Spectra	Distinct	Distinct	% AA	Total	Protein MW	Protein	Species	Database	Protein Name
(#)	(#)	(#)	Peptides	Summed	Coverage	Protein	(Da)	pI		Accession #
			(#)	MS/MS Search		Spectral
				Score		Intensity
136	136.1	1	1	4.78	3	2550	34895.5	6.4	CAEEL	P91530
#	Filename	z	Score	Spectrum	Variable	Sequence	Sequence Map	Modifications	MH+	MH+	MH+
				Intensity	Sites			Map	Matched	Mass Shift	Error
									(Da)	(Da)	(ppm)
1	CSAKAZAKII24HC.2805.2805.3	3	4.78	2550		(K)TDKITRNGK(T)	(K)T\D|K I/T R N\G K(T)		1032.58	0.0087	8.5
Group	Subgroup	Spectra	Distinct	Distinct	% AA	Total	Protein MW	Protein	Species	Database	Protein Name
(#)	(#)	(#)	Peptides	Summed	Coverage	Protein	(Da)	pI		Accession #
			(#)	MS/MS Search		Spectral
				Score		Intensity
137	137.1	1	1	4.75	3.3	1340	52977.6	5.23	CAEEL	O18000
#	Filename	z	Score	Spectrum	Variable	Sequence	Sequence Map	Modifications	MH+	MH+	MH+
				Intensity	Sites			Map	Matched	Mass Shift	Error
									(Da)	(Da)	(ppm)
1	CSAKAZAKII24HA.4804.4804.3	3	4.75	1340		(K)TVKLPPVLLGTLGSDK(N)	(K)T V K L\P/P\V L L G T L G S D/K(N)		1637.98	0.0246	15
Group	Subgroup	Spectra	Distinct	Distinct	% AA	Total	Protein MW	Protein	Species	Database	Protein Name
(#)	(#)	(#)	Peptides	Summed	Coverage	Protein	(Da)	pI		Accession #
			(#)	MS/MS Search		Spectral
				Score		Intensity
138	138.1	1	1	4.72	2.6	4270	53399.6	5.44	CAEEL	K8ESD4
#	Filename	z	Score	Spectrum	Variable	Sequence	Sequence Map	Modifications	MH+	MH+	MH+
				Intensity	Sites			Map	Matched	Mass Shift	Error
									(Da)	(Da)	(ppm)
1	CSAKAZAKII24HB.3613.3613.3	3	4.72	4270		(K)ELWWYGDETSATK(L)	(K)E L W W Y G|D E T/S A T K(L)		1585.72	-0.0139	-8.8
Group	Subgroup	Spectra	Distinct	Distinct	% AA	Total	Protein MW	Protein	Species	Database	Protein Name
(#)	(#)	(#)	Peptides	Summed	Coverage	Protein	(Da)	pI		Accession #
			(#)	MS/MS Search		Spectral
				Score		Intensity
139	139.1	1	1	4.66	3.2	966	24703.1	9.55	CAEEL	O17040
#	Filename	z	Score	Spectrum	Variable	Sequence	Sequence Map	Modifications	MH+	MH+	MH+
				Intensity	Sites			Map	Matched	Mass Shift	Error
									(Da)	(Da)	(ppm)
1	CSAKAZAKII24HB.2367.2367.2	2	4.66	966		(K)ILGGGSK(K)	(K)I/L|G\G G S K(K)		631.377	-0.002	-3.2
Group	Subgroup	Spectra	Distinct	Distinct	% AA	Total	Protein MW	Protein	Species	Database	Protein Name
(#)	(#)	(#)	Peptides	Summed	Coverage	Protein	(Da)	pI		Accession #
			(#)	MS/MS Search		Spectral
				Score		Intensity
140	140.1	1	1	4.61	0.9	110000	147805	9.05	CAEEL	G5EG61
#	Filename	z	Score	Spectrum	Variable	Sequence	Sequence Map	Modifications	MH+	MH+	MH+
				Intensity	Sites			Map	Matched	Mass Shift	Error
									(Da)	(Da)	(ppm)
1	CSAKAZAKII24HB.5192.5192.3	3	4.61	110000		(R)CELFFDHYQTSSK(Q)	(R)C E/L F/F D H/Y\Q\T S S/K(Q)	C:Carbamidomethylation	1661.73	0.0093	5.6
Group	Subgroup	Spectra	Distinct	Distinct	% AA	Total	Protein MW	Protein	Species	Database	Protein Name
(#)	(#)	(#)	Peptides	Summed	Coverage	Protein	(Da)	pI		Accession #
			(#)	MS/MS Search		Spectral
				Score		Intensity
141	141.1	1	1	4.6	2	784	65819.9	6.62	CAEEL	Q23535
#	Filename	z	Score	Spectrum	Variable	Sequence	Sequence Map	Modifications	MH+	MH+	MH+
				Intensity	Sites			Map	Matched	Mass Shift	Error
									(Da)	(Da)	(ppm)
1	CSAKAZAKII24HC.3388.3388.2	2	4.6	784		(K)EPAGLLSSICER(L)	(K)E P A G L L S S I/C/E R(L)	C:Carbamidomethylation	1331.66	-0.016	-12
Group	Subgroup	Spectra	Distinct	Distinct	% AA	Total	Protein MW	Protein	Species	Database	Protein Name
(#)	(#)	(#)	Peptides	Summed	Coverage	Protein	(Da)	pI		Accession #
			(#)	MS/MS Search		Spectral
				Score		Intensity
142	142.1	1	1	4.58	0.8	44900	159112	5.72	CAEEL	Q93520
#	Filename	z	Score	Spectrum	Variable	Sequence	Sequence Map	Modifications	MH+	MH+	MH+
				Intensity	Sites			Map	Matched	Mass Shift	Error
									(Da)	(Da)	(ppm)
1	CSAKAZAKII24HB.5270.5270.3	3	4.58	44900		(R)LAEYHLTEYSAR(L)	(R)L\A E/Y/H L T\E Y S A R(L)		1452.71	-0.0034	-2.3
Group	Subgroup	Spectra	Distinct	Distinct	% AA	Total	Protein MW	Protein	Species	Database	Protein Name
(#)	(#)	(#)	Peptides	Summed	Coverage	Protein	(Da)	pI		Accession #
			(#)	MS/MS Search		Spectral
				Score		Intensity
143	143.1	1	1	4.53	12.5	18100	11770.5	6.11	CAEEL	Q8MPX7
#	Filename	z	Score	Spectrum	Variable	Sequence	Sequence Map	Modifications	MH+	MH+	MH+
				Intensity	Sites			Map	Matched	Mass Shift	Error
									(Da)	(Da)	(ppm)
1	CSAKAZAKII24HB.3929.3929.2	2	4.53	18100		(K)ELESGTAPKDVCK(K)	(K)E/L E S G T A P K D V C K(K)	C:Carbamidomethylation	1433.69	0.0199	13.9
Group	Subgroup	Spectra	Distinct	Distinct	% AA	Total	Protein MW	Protein	Species	Database	Protein Name
(#)	(#)	(#)	Peptides	Summed	Coverage	Protein	(Da)	pI		Accession #
			(#)	MS/MS Search		Spectral
				Score		Intensity
144	144.1	1	1	4.46	3.4	90400	22539.5	6.78	CAEEL	Q9TXI3
#	Filename	z	Score	Spectrum	Variable	Sequence	Sequence Map	Modifications	MH+	MH+	MH+
				Intensity	Sites			Map	Matched	Mass Shift	Error
									(Da)	(Da)	(ppm)
1	CSAKAZAKII24HA.2907.2907.2	2	4.46	90400		(R)IDAVAAR(V)	(R)I D/A/V A/A R(V)		715.41	0.0038	5.4
Group	Subgroup	Spectra	Distinct	Distinct	% AA	Total	Protein MW	Protein	Species	Database	Protein Name
(#)	(#)	(#)	Peptides	Summed	Coverage	Protein	(Da)	pI		Accession #
			(#)	MS/MS Search		Spectral
				Score		Intensity
145	145.1	1	1	4.45	5.2	1360	35703.1	8.85	CAEEL	M1ZJS7
#	Filename	z	Score	Spectrum	Variable	Sequence	Sequence Map	Modifications	MH+	MH+	MH+
				Intensity	Sites			Map	Matched	Mass Shift	Error
									(Da)	(Da)	(ppm)
1	CSAKAZAKII24HA.3602.3602.4	4	4.45	1360		(R)GQKGPIGPKGDSGPPGQK(G)	(R)G Q K\G P\I/G P K/G D S G P/P G Q K(G)		1704.9	0.024	14.1
Group	Subgroup	Spectra	Distinct	Distinct	% AA	Total	Protein MW	Protein	Species	Database	Protein Name
(#)	(#)	(#)	Peptides	Summed	Coverage	Protein	(Da)	pI		Accession #
			(#)	MS/MS Search		Spectral
				Score		Intensity
146	146.1	1	1	4.44	6.3	2960	20749.8	9.7	CAEEL	A0A0K3ARL4
#	Filename	z	Score	Spectrum	Variable	Sequence	Sequence Map	Modifications	MH+	MH+	MH+
				Intensity	Sites			Map	Matched	Mass Shift	Error
									(Da)	(Da)	(ppm)
1	CSAKAZAKII24HA.3969.3969.2	2	4.44	2960	M52m	(K)KSVIFAECSmAR(I)	(K)K S V I F A E C/S m A R(I)	C:Carbamidomethylation	1398.69	15.9758	-13.5
								m:Oxidized methionine
Group	Subgroup	Spectra	Distinct	Distinct	% AA	Total	Protein MW	Protein	Species	Database	Protein Name
(#)	(#)	(#)	Peptides	Summed	Coverage	Protein	(Da)	pI		Accession #
			(#)	MS/MS Search		Spectral
				Score		Intensity
147	147.1	1	1	4.32	2.2	3350	29296.6	9.74	CAEEL	Q18934
#	Filename	z	Score	Spectrum	Variable	Sequence	Sequence Map	Modifications	MH+	MH+	MH+
				Intensity	Sites			Map	Matched	Mass Shift	Error
									(Da)	(Da)	(ppm)
1	CSAKAZAKII24HA.2933.2933.2	2	4.32	3350		(K)RAVANK(K)	(K)R A|V/A/N K(K)		658.399	0.0122	18.5
Group	Subgroup	Spectra	Distinct	Distinct	% AA	Total	Protein MW	Protein	Species	Database	Protein Name
(#)	(#)	(#)	Peptides	Summed	Coverage	Protein	(Da)	pI		Accession #
			(#)	MS/MS Search		Spectral
				Score		Intensity
148	148.1	1	1	4.3	1.3	26300	60142.4	6.92	CAEEL	B1Q250
#	Filename	z	Score	Spectrum	Variable	Sequence	Sequence Map	Modifications	MH+	MH+	MH+
				Intensity	Sites			Map	Matched	Mass Shift	Error
									(Da)	(Da)	(ppm)
1	CSAKAZAKII24HC.2838.2838.2	2	4.3	26300		(R)YVLSCFK(L)	(R)Y V L S C F K(L)	C:Carbamidomethylation	916.46	-0.009	-9.8
Group	Subgroup	Spectra	Distinct	Distinct	% AA	Total	Protein MW	Protein	Species	Database	Protein Name
(#)	(#)	(#)	Peptides	Summed	Coverage	Protein	(Da)	pI		Accession #
			(#)	MS/MS Search		Spectral
				Score		Intensity
149	149.1	1	1	4.28	2.1	110000	80126.6	8.61	CAEEL	Q18563
#	Filename	z	Score	Spectrum	Variable	Sequence	Sequence Map	Modifications	MH+	MH+	MH+
				Intensity	Sites			Map	Matched	Mass Shift	Error
									(Da)	(Da)	(ppm)
1	CSAKAZAKII24HB.5234.5234.3	3	4.28	110000		(R)MGKSGDDGSQEPQGIR(H)	(R)M G K/S G\D D/G\S/Q E P Q G I R(H)		1661.76	-0.019	-11.4
Group	Subgroup	Spectra	Distinct	Distinct	% AA	Total	Protein MW	Protein	Species	Database	Protein Name
(#)	(#)	(#)	Peptides	Summed	Coverage	Protein	(Da)	pI		Accession #
			(#)	MS/MS Search		Spectral
				Score		Intensity
150	150.1	1	1	4.27	2.1	7910	43876	9.89	CAEEL	Q7YTI1
#	Filename	z	Score	Spectrum	Variable	Sequence	Sequence Map	Modifications	MH+	MH+	MH+
				Intensity	Sites			Map	Matched	Mass Shift	Error
									(Da)	(Da)	(ppm)
1	CSAKAZAKII24HC.2294.2294.3	3	4.27	7910		(K)SLDNQWSK(V)	(K)S L D N Q|W|S K(V)		977.469	0.0161	16.5
Group	Subgroup	Spectra	Distinct	Distinct	% AA	Total	Protein MW	Protein	Species	Database	Protein Name
(#)	(#)	(#)	Peptides	Summed	Coverage	Protein	(Da)	pI		Accession #
			(#)	MS/MS Search		Spectral
				Score		Intensity
151	151.1	1	1	4.23	1.7	401000	39660.4	4.67	CAEEL	G5EF11
#	Filename	z	Score	Spectrum	Variable	Sequence	Sequence Map	Modifications	MH+	MH+	MH+
				Intensity	Sites			Map	Matched	Mass Shift	Error
									(Da)	(Da)	(ppm)
1	CSAKAZAKII24HC.2497.2497.2	2	4.23	401000		(R)VGTQVR(L)	(R)V G/T/Q/V/R(L)		659.384	-0.0009	-1.3
Group	Subgroup	Spectra	Distinct	Distinct	% AA	Total	Protein MW	Protein	Species	Database	Protein Name
(#)	(#)	(#)	Peptides	Summed	Coverage	Protein	(Da)	pI		Accession #
			(#)	MS/MS Search		Spectral
				Score		Intensity
152	152.1	1	1	4.17	0.5	1490	138396	9.37	CAEEL	A0A1N7SYS6
#	Filename	z	Score	Spectrum	Variable	Sequence	Sequence Map	Modifications	MH+	MH+	MH+
				Intensity	Sites			Map	Matched	Mass Shift	Error
									(Da)	(Da)	(ppm)
1	CSAKAZAKII24HA.2875.2875.2	2	4.17	1490		(R)SENPSKR(S)	(R)S/E N P S/K R(S)		817.416	0.0126	15.4
Group	Subgroup	Spectra	Distinct	Distinct	% AA	Total	Protein MW	Protein	Species	Database	Protein Name
(#)	(#)	(#)	Peptides	Summed	Coverage	Protein	(Da)	pI		Accession #
			(#)	MS/MS Search		Spectral
				Score		Intensity
153	153.1	1	1	4.16	3.6	18300	41899	9.26	CAEEL	Q95Y07
#	Filename	z	Score	Spectrum	Variable	Sequence	Sequence Map	Modifications	MH+	MH+	MH+
				Intensity	Sites			Map	Matched	Mass Shift	Error
									(Da)	(Da)	(ppm)
1	CSAKAZAKII24HA.3867.3867.3	3	4.16	18300	M1m	(-)mPQHCQVCGVPSAR(I)	(-)m P Q\H\C Q V C\G/V P S A R(I)	C:Carbamidomethylation	1626.73	16.0057	6.6
								m:Oxidized methionine
Group	Subgroup	Spectra	Distinct	Distinct	% AA	Total	Protein MW	Protein	Species	Database	Protein Name
(#)	(#)	(#)	Peptides	Summed	Coverage	Protein	(Da)	pI		Accession #
			(#)	MS/MS Search		Spectral
				Score		Intensity
154	154.1	1	1	4.15	2.8	5590	48867.2	9.7	CAEEL	Q22518
#	Filename	z	Score	Spectrum	Variable	Sequence	Sequence Map	Modifications	MH+	MH+	MH+
				Intensity	Sites			Map	Matched	Mass Shift	Error
									(Da)	(Da)	(ppm)
1	CSAKAZAKII24HC.4727.4727.3	3	4.15	5590		(K)LEQLLKEANKNK(A)	(K)L E\Q/L\L K E A/N K N K(A)		1427.82	0.0269	18.8
Group	Subgroup	Spectra	Distinct	Distinct	% AA	Total	Protein MW	Protein	Species	Database	Protein Name
(#)	(#)	(#)	Peptides	Summed	Coverage	Protein	(Da)	pI		Accession #
			(#)	MS/MS Search		Spectral
				Score		Intensity
155	155.1	1	1	4.14	3.3	2820	24266.8	9.08	CAEEL	Q17798
#	Filename	z	Score	Spectrum	Variable	Sequence	Sequence Map	Modifications	MH+	MH+	MH+
				Intensity	Sites			Map	Matched	Mass Shift	Error
									(Da)	(Da)	(ppm)
1	CSAKAZAKII24HA.3708.3708.2	2	4.14	2820		(K)QTIIESR(S)	(K)Q T|I/I E/S R(S)		846.468	0.0039	4.6
Group	Subgroup	Spectra	Distinct	Distinct	% AA	Total	Protein MW	Protein	Species	Database	Protein Name
(#)	(#)	(#)	Peptides	Summed	Coverage	Protein	(Da)	pI		Accession #
			(#)	MS/MS Search		Spectral
				Score		Intensity
156	156.1	1	1	4.14	0.9	21200	122869	5.62	CAEEL	Q18289
#	Filename	z	Score	Spectrum	Variable	Sequence	Sequence Map	Modifications	MH+	MH+	MH+
				Intensity	Sites			Map	Matched	Mass Shift	Error
									(Da)	(Da)	(ppm)
1	CSAKAZAKII24HA.4621.4621.3	3	4.14	21200		(K)RPIKEPVREK(N)	(K)R P I K E/P/V\R E K(N)		1251.75	-0.0051	-4.1
Group	Subgroup	Spectra	Distinct	Distinct	% AA	Total	Protein MW	Protein	Species	Database	Protein Name
(#)	(#)	(#)	Peptides	Summed	Coverage	Protein	(Da)	pI		Accession #
			(#)	MS/MS Search		Spectral
				Score		Intensity
157	157.1	1	1	4.13	1.3	1730	131395	5.76	CAEEL	G4RXT9
#	Filename	z	Score	Spectrum	Variable	Sequence	Sequence Map	Modifications	MH+	MH+	MH+
				Intensity	Sites			Map	Matched	Mass Shift	Error
									(Da)	(Da)	(ppm)
1	CSAKAZAKII24HC.5171.5171.3	3	4.13	1730		(K)EEGRAGDEDETLDVK(E)	(K)E E G R A G D|E D/E T L D V K(E)		1662.74	-0.0023	-1.4
Group	Subgroup	Spectra	Distinct	Distinct	% AA	Total	Protein MW	Protein	Species	Database	Protein Name
(#)	(#)	(#)	Peptides	Summed	Coverage	Protein	(Da)	pI		Accession #
			(#)	MS/MS Search		Spectral
				Score		Intensity
158	158.1	1	1	4.12	2.6	5180	39087.4	7.04	CAEEL	P91321
#	Filename	z	Score	Spectrum	Variable	Sequence	Sequence Map	Modifications	MH+	MH+	MH+
				Intensity	Sites			Map	Matched	Mass Shift	Error
									(Da)	(Da)	(ppm)
1	CSAKAZAKII24HB.3700.3700.2	2	4.12	5180		(R)LAPEGKMSK(A)	(R)L/A P/E G K M S/K(A)		960.518	-0.0049	-5.1
Group	Subgroup	Spectra	Distinct	Distinct	% AA	Total	Protein MW	Protein	Species	Database	Protein Name
(#)	(#)	(#)	Peptides	Summed	Coverage	Protein	(Da)	pI		Accession #
			(#)	MS/MS Search		Spectral
				Score		Intensity
159	159.1	1	1	4.11	0.1	67500	559947	5.13	CAEEL	A0A1N7SYN7
#	Filename	z	Score	Spectrum	Variable	Sequence	Sequence Map	Modifications	MH+	MH+	MH+
				Intensity	Sites			Map	Matched	Mass Shift	Error
									(Da)	(Da)	(ppm)
1	CSAKAZAKII24HC.2308.2308.3	3	4.11	67500		(R)GERIPHPIK(V)	(R)G/E R|I P H P\I K(V)		1046.61	-0.0162	-15.5
Group	Subgroup	Spectra	Distinct	Distinct	% AA	Total	Protein MW	Protein	Species	Database	Protein Name
(#)	(#)	(#)	Peptides	Summed	Coverage	Protein	(Da)	pI		Accession #
			(#)	MS/MS Search		Spectral
				Score		Intensity
160	160.1	1	1	4.11	2.4	18300	64906.7	6.92	CAEEL	Q95QR2
#	Filename	z	Score	Spectrum	Variable	Sequence	Sequence Map	Modifications	MH+	MH+	MH+
				Intensity	Sites			Map	Matched	Mass Shift	Error
									(Da)	(Da)	(ppm)
1	CSAKAZAKII24HA.3831.3831.3	3	4.11	18300		(K)QENGETGRNFMTMK(Q)	(K)Q E N G E T G R N F M/T M/K(Q)		1642.73	0.0042	2.6
Group	Subgroup	Spectra	Distinct	Distinct	% AA	Total	Protein MW	Protein	Species	Database	Protein Name
(#)	(#)	(#)	Peptides	Summed	Coverage	Protein	(Da)	pI		Accession #
			(#)	MS/MS Search		Spectral
				Score		Intensity
161	161.1	1	1	4.06	0.9	6600	92875.8	9.44	CAEEL	Q19046
#	Filename	z	Score	Spectrum	Variable	Sequence	Sequence Map	Modifications	MH+	MH+	MH+
				Intensity	Sites			Map	Matched	Mass Shift	Error
									(Da)	(Da)	(ppm)
1	CSAKAZAKII24HC.3681.3681.2	2	4.06	6600		(K)AERSQNKK(T)	(K)A E|R S Q/N\K/K(T)		960.522	-0.0076	-7.9
Group	Subgroup	Spectra	Distinct	Distinct	% AA	Total	Protein MW	Protein	Species	Database	Protein Name
(#)	(#)	(#)	Peptides	Summed	Coverage	Protein	(Da)	pI		Accession #
			(#)	MS/MS Search		Spectral
				Score		Intensity
162	162.1	1	1	4.06	4.3	4940	52934.4	9.24	CAEEL	Q23675
#	Filename	z	Score	Spectrum	Variable	Sequence	Sequence Map	Modifications	MH+	MH+	MH+
				Intensity	Sites			Map	Matched	Mass Shift	Error
									(Da)	(Da)	(ppm)
1	CSAKAZAKII24HC.3985.3985.3	3	4.06	4940		(R)DDSDDIFKDQNSAKGGFAVR(W)	(R)D D/S D D I F K/D Q N S/A K/G G F A V R(W)		2185.02	0.0132	6.1
Group	Subgroup	Spectra	Distinct	Distinct	% AA	Total	Protein MW	Protein	Species	Database	Protein Name
(#)	(#)	(#)	Peptides	Summed	Coverage	Protein	(Da)	pI		Accession #
			(#)	MS/MS Search		Spectral
				Score		Intensity
163	163.1	1	1	4.03	1.3	3360	93100.3	5.76	CAEEL	G5ED52
#	Filename	z	Score	Spectrum	Variable	Sequence	Sequence Map	Modifications	MH+	MH+	MH+
				Intensity	Sites			Map	Matched	Mass Shift	Error
									(Da)	(Da)	(ppm)
1	CSAKAZAKII24HB.3237.3237.3	3	4.03	3360	M561m	(R)SDYEmEKEAVR(L)	(R)S/D Y E\m/E/K E/A V R(L)	m:Oxidized methionine	1356.61	15.9739	-15.3
Group	Subgroup	Spectra	Distinct	Distinct	% AA	Total	Protein MW	Protein	Species	Database	Protein Name
(#)	(#)	(#)	Peptides	Summed	Coverage	Protein	(Da)	pI		Accession #
			(#)	MS/MS Search		Spectral
				Score		Intensity
164	164.1	1	1	4.01	2.5	2930	39445	4.8	CAEEL	H2KZL8
#	Filename	z	Score	Spectrum	Variable	Sequence	Sequence Map	Modifications	MH+	MH+	MH+
				Intensity	Sites			Map	Matched	Mass Shift	Error
									(Da)	(Da)	(ppm)
1	CSAKAZAKII24HC.3698.3698.2	2	4.01	2930		(R)KMVVGGAGK(T)	(R)K M\V/V/G G A G\K(T)		846.487	-0.0134	-15.9
Group	Subgroup	Spectra	Distinct	Distinct	% AA	Total	Protein MW	Protein	Species	Database	Protein Name
(#)	(#)	(#)	Peptides	Summed	Coverage	Protein	(Da)	pI		Accession #
			(#)	MS/MS Search		Spectral
				Score		Intensity
165	165.1	1	1	3.91	2.5	28700	46791.3	5.98	CAEEL	Q18020
#	Filename	z	Score	Spectrum	Variable	Sequence	Sequence Map	Modifications	MH+	MH+	MH+
				Intensity	Sites			Map	Matched	Mass Shift	Error
									(Da)	(Da)	(ppm)
1	CSAKAZAKII24HA.4235.4258.2	2	3.91	28700	M171m	(K)FDmTYNTGEVK(G)	(K)F D m T Y N|T G E V/K(G)	m:Oxidized methionine	1304.58	15.9893	-4.2
Group	Subgroup	Spectra	Distinct	Distinct	% AA	Total	Protein MW	Protein	Species	Database	Protein Name
(#)	(#)	(#)	Peptides	Summed	Coverage	Protein	(Da)	pI		Accession #
			(#)	MS/MS Search		Spectral
				Score		Intensity
166	166.1	1	1	3.91	2	1130	78744.2	8.92	CAEEL	Q19585
#	Filename	z	Score	Spectrum	Variable	Sequence	Sequence Map	Modifications	MH+	MH+	MH+
				Intensity	Sites			Map	Matched	Mass Shift	Error
									(Da)	(Da)	(ppm)
1	CSAKAZAKII24HB.7256.7256.3	3	3.91	1130		(K)LVFQNIQAVVLKKK(G)	(K)L V F Q N I/Q A\V V|L\K K K(G)		1628.03	-0.0212	-13
Group	Subgroup	Spectra	Distinct	Distinct	% AA	Total	Protein MW	Protein	Species	Database	Protein Name
(#)	(#)	(#)	Peptides	Summed	Coverage	Protein	(Da)	pI		Accession #
			(#)	MS/MS Search		Spectral
				Score		Intensity
167	167.1	1	1	3.89	5	49500	38819.3	9.54	CAEEL	Q9GS11
#	Filename	z	Score	Spectrum	Variable	Sequence	Sequence Map	Modifications	MH+	MH+	MH+
				Intensity	Sites			Map	Matched	Mass Shift	Error
									(Da)	(Da)	(ppm)
1	CSAKAZAKII24HC.4015.4015.2	2	3.89	49500		(K)DFFRNITMQLYDEDIDK(I)	(K)D F F R N I T M Q/L Y D E D I D K(I)		2163.01	0.04	18.5
Group	Subgroup	Spectra	Distinct	Distinct	% AA	Total	Protein MW	Protein	Species	Database	Protein Name
(#)	(#)	(#)	Peptides	Summed	Coverage	Protein	(Da)	pI		Accession #
			(#)	MS/MS Search		Spectral
				Score		Intensity
168	168.1	1	1	3.88	2.4	2930	39447	9.91	CAEEL	Q9XV83
#	Filename	z	Score	Spectrum	Variable	Sequence	Sequence Map	Modifications	MH+	MH+	MH+
				Intensity	Sites			Map	Matched	Mass Shift	Error
									(Da)	(Da)	(ppm)
1	CSAKAZAKII24HC.3683.3683.2	2	3.88	2930		(K)TGAVVFPR(Q)	(K)T\G A|V/V F P R(Q)		846.483	-0.0101	-11.9
Group	Subgroup	Spectra	Distinct	Distinct	% AA	Total	Protein MW	Protein	Species	Database	Protein Name
(#)	(#)	(#)	Peptides	Summed	Coverage	Protein	(Da)	pI		Accession #
			(#)	MS/MS Search		Spectral
				Score		Intensity
169	169.1	2	1	3.86	0.3	13600	431424	6.89	CAEEL	A0A078BQN0
#	Filename	z	Score	Spectrum	Variable	Sequence	Sequence Map	Modifications	MH+	MH+	MH+
				Intensity	Sites			Map	Matched	Mass Shift	Error
									(Da)	(Da)	(ppm)
1	CSAKAZAKII24HB.4677.4677.2	2	3.86	6980	M3497m	(K)VPGGPmEDDGQK(L)	(K)V/P G\G P m E D D/G Q/K(L)	m:Oxidized methionine	1229.55	15.9923	-2.1
2	CSAKAZAKII24HA.4683.4683.2	2	3.67	6590	M3497m	(K)VPGGPmEDDGQK(L)	(K)V/P G G P m E D\D/G Q/K(L)	m:Oxidized methionine	1229.55	15.9978	2.3
Group	Subgroup	Spectra	Distinct	Distinct	% AA	Total	Protein MW	Protein	Species	Database	Protein Name
(#)	(#)	(#)	Peptides	Summed	Coverage	Protein	(Da)	pI		Accession #
			(#)	MS/MS Search		Spectral
				Score		Intensity
[truncated: 340 more rows]

## Sheet: Protein-Protein Comparision
Spectrum Mill - Protein Peptide/Summary
Results Shown Filtered by Validation Category: sequence-not-validated
Data Directory: msdataSM\CSAKAZAKII24HA - SpecFeatures read
Retrieving all hits from tagSummary file.
all hits read from tagSummary file num hits: 207
original hits subset determined from files: 88 Files: 88 Hits: 205
Data Directory: msdataSM\CSAKAZAKII24HB - SpecFeatures read
Retrieving all hits from tagSummary file.
all hits read from tagSummary file num hits: 149
original hits subset determined from files: 91 Files: 91 Hits: 146
Data Directory: msdataSM\CSAKAZAKII24HC - SpecFeatures read
Retrieving all hits from tagSummary file.
all hits read from tagSummary file num hits: 216
original hits subset determined from files: 107 Files: 107 Hits: 213
beginning to assemble proteins .... proteins assembled 0.023343 sec
proteins filtered by distinct peptides 0.006124 sec
proteins filtered by score
calculated protein coverage maps 0.163457 sec
beginning to roll up 375 proteins into groups ...
Sorted peptides by length to accelerate peptide roll up 0.006076 sec
completed primary peptide roll up 3915 sequence comparisons 0.075849 sec
completed post roll up subgrouping and sorting 0.004886 sec
Finished protein roll up into 207 groups 0.087952 sec
protein groups ready for display
proteinGroupingMethod: oneSharedPeptideSubgrouped Subgroups expanded 1.08e-001 sec
total intensity: sum of intensity for all spectra of peptides belonging to protein
CSAKAZAKII24HA	CSAKAZAKII24HB	CSAKAZAKII24HC	Columns	Spectra	Protein MW	Protein	Species	# Rank 1	# Shared	# Shared	Shared	# Distinct	# Distinct	Distinct	# Distinct	Database	%AA	Distinct	Distinct	Group	Subgroup	Protein Name
# spectra	# spectra	# spectra	Protein	Protein	(Da)	pI		Species Present	Peptides	Spectra	Total	Peptides	Spectra	Total	Peptides Species 2	Accession #	Coverage	Peptides	Summed	#	#
total intensity	total intensity	total intensity	Observed	Observed							Intensity	Species 1	Species 1	Intensity				(#CI)	MS/MS Search
			(#)	(#)										Species 1					Score
5	1	3	3	9	42137.4	5.3	CAEEL	1			0	6	9	107000	0	P0DM41	12.2	6	56.11	1	1.1
68300	22700	16100
4	4	4	3	12	51123.9	9.35	CAEEL	1			0	4	12	80000	0	P53013	8.2	4	28.63	2	2.1
26800	17200	36000
2	1	1	3	4	53610.1	6.17	CAEEL	1			0	1	4	1600000	0	Q09400	1.2	1	15.54	3	3.1
792000	403000	401000
1	1	1	3	3	38009.2	8.8	CAEEL	1			0	1	3	46000	0	V6CLB7	1.8	1	13.55	4	4.1
16300	12200	17500
1	1	1	3	3	63688.4	5.62	CAEEL	1			0	1	3	358000	0	Q9N4P3	1	1	13.02	5	5.1
120000	119000	119000
1	1	0	2	2	12029.7	10.56	CAEEL	1			0	1	2	120000	0	Q09558	7.9	1	12.7	6	6.1
63900	56600	0
0	2	2	2	4	33215.3	9.86	CAEEL	1			0	2	4	16400	0	O45865	5	2	12.62	7	7.1
0	6890	9500
1	1	0	2	2	14454.6	10.88	CAEEL	1			0	2	2	6700	0	J7S164	11.7	2	12.53	8	8.1
1450	5250	0
1	1	1	3	3	109608	4.37	CAEEL	1			0	2	3	150000	0	Q09560	1.5	2	12.46	9	9.1
25800	56600	67500
0	1	1	2	2	40441.2	7.88	CAEEL	1			0	2	2	15700	0	Q9XXS2	5.5	2	12.33	10	10.1
0	3260	12400
0	1	1	2	2	69685.1	6.48	CAEEL	1			0	1	2	11600	0	H2L034	2	1	11.83	11	11.1
0	5640	5990
0	2	0	1	2	231090	9.01	CAEEL	1			0	2	2	14800	0	O16237	0.7	2	11.61	12	12.1
0	14800	0
0	0	1	1	1	95820.5	5.12	CAEEL	1			0	1	1	6790	0	Q9NA64	2	1	11.55	13	13.1
0	0	6790
2	1	2	3	5	461741	5.2	CAEEL	1			0	1	5	93600	0	H2L075	0.1	1	10.72	14	14.1
42000	19700	31900
0	0	1	1	1	45012.8	7.83	CAEEL	1			0	1	1	1510	0	G5EDP2	6.3	1	10.56	15	15.1
0	0	1510
1	1	0	2	2	11426.2	11.36	CAEEL	1			0	1	2	6360	0	P62784	11.6	1	10.42	16	16.1
1930	4430	0
1	0	0	1	1	101585	9.22	CAEEL	1			0	1	1	8100	0	Q8WQL7	2.7	1	10.02	17	17.1
8100	0	0
1	0	0	1	1	61407.8	9.55	CAEEL	1			0	1	1	34700	0	H2KYE7	2.2	1	9.95	18	18.1
34700	0	0
1	0	0	1	1	129634	8.78	CAEEL	1			0	1	1	18300	0	B2MZB8	1.2	1	9.84	19	19.1
18300	0	0
1	0	0	1	1	53281.6	9.38	CAEEL	1			0	1	1	9210	0	Q8MYL9	2.1	1	9.81	20	20.1
9210	0	0
1	1	0	2	2	131610	9.31	CAEEL	1			0	2	2	637000	0	Q20878	1	2	9.71	21	21.1
449000	189000	0
1	0	0	1	1	40413.2	9.18	CAEEL	1			0	1	1	1920	0	Q21600	3.1	1	9.56	22	22.1
1920	0	0
0	1	0	1	1	48532.3	6.71	CAEEL	1			0	1	1	16000	0	Q9XVS8	1.9	1	9.56	23	23.1
0	16000	0
2	1	1	3	4	74997.9	8.26	CAEEL	1			0	1	4	230000	0	O62139	2.7	1	9.38	24	24.1
111000	62200	56700
1	2	1	3	4	55695.2	11.42	CAEEL	1			0	1	4	1090000	0	Q09633	1.5	1	9.37	25	25.1
253000	575000	265000
0	0	2	1	2	55582.5	8.78	CAEEL	1			0	1	2	8730	0	Q9NF64	1.6	1	9.2	26	26.1
0	0	8730
2	0	1	2	3	46776.7	7.82	CAEEL	1			0	1	3	161000	0	H2L0B0	4.5	1	9.13	27	27.1
111000	0	49500
2	2	1	3	5	36175.7	8.5	CAEEL	1			0	1	5	239000	0	O62515	2.8	1	9.08	28	28.1
92800	95000	51400
0	0	1	1	1	83783.3	6.31	CAEEL	1			0	1	1	232000	0	P34422	1.4	1	9.03	29	29.1
0	0	232000
0	1	1	2	2	25532.8	9.64	CAEEL	1			0	1	2	14100	0	Q9TY00	5.4	1	8.97	30	30.1
0	7590	6540
1	1	0	2	2	47717.5	7.86	CAEEL	1			0	1	2	24700	0	Q20169	2.6	1	8.96	31	31.1
17800	6980	0
0	0	1	1	1	53203.4	9.05	CAEEL	1			0	1	1	632	0	Q9U334	2.6	1	8.89	32	32.1
0	0	632
0	0	1	1	1	159573	6.13	CAEEL	1			0	1	1	1170	0	G5EDY1	1.1	1	8.86	33	33.1
0	0	1170
0	0	1	1	1	19315.3	6.8	CAEEL	1			0	1	1	22700	0	E0AHC8	12.1	1	8.82	34	34.1
0	0	22700
0	1	0	1	1	61967	9.57	CAEEL	1			0	1	1	22600	0	Q95Y89	4.3	1	8.81	35	35.1
0	22600	0
2	0	1	2	3	39478.2	6.48	CAEEL	1			0	1	3	265000	0	G5EGG8	2.2	1	8.61	36	36.1
170000	0	95100
0	0	1	1	1	67405.8	6.14	CAEEL	1			0	1	1	12600	0	O61192	4	1	8.5	37	37.1
0	0	12600
1	0	0	1	1	62978.1	9.59	CAEEL	1			0	1	1	63900	0	A0A0S4XR26	1.5	1	8.37	38	38.1
63900	0	0
0	1	0	1	1	38618.7	9.65	CAEEL	1			0	1	1	25200	0	P91475	2.7	1	8.23	39	39.1
0	25200	0
0	0	1	1	1	54272.7	6.24	CAEEL	1			0	1	1	3650	0	P52717	2.3	1	8.2	40	40.1
0	0	3650
0	1	0	1	1	47230.2	8.5	CAEEL	1			0	1	1	51500	0	O01733	4.4	1	8.19	41	41.1
0	51500	0
0	0	1	1	1	104424	9	CAEEL	1			0	1	1	22700	0	G5EEK3	2.3	1	8.16	42	42.1
0	0	22700
0	0	1	1	1	77960.4	9.04	CAEEL	1			0	1	1	19900	0	Q22249	1.1	1	8.11	43	43.1
0	0	19900
0	1	1	2	2	55271.1	8.69	CAEEL	1			0	1	2	352000	0	H2KZ09	1	1	8.04	44	44.1
0	189000	163000
0	0	1	1	1	13459.3	9.22	CAEEL	1			0	1	1	122000	0	O16542	16	1	8.01	45	45.1
0	0	122000
0	0	1	1	1	85072.4	8.52	CAEEL	1			0	1	1	13200	0	G5EEA7	1.7	1	7.96	46	46.1
0	0	13200
0	0	1	1	1	35114	6.42	CAEEL	1			0	1	1	1170	0	Q5FC21	4.6	1	7.94	47	47.1
0	0	1170
0	0	1	1	1	47101.1	8.84	CAEEL	1			0	1	1	7030	0	Q21039	5.3	1	7.8	48	48.1
0	0	7030
1	0	0	1	1	39284.3	8.41	CAEEL	1			0	1	1	8420	0	O44517	3.8	1	7.77	49	49.1
8420	0	0
1	0	0	1	1	77300.5	7.79	CAEEL	1			0	1	1	36400	0	Q20059	2	1	7.74	50	50.1
36400	0	0
0	0	1	1	1	117809	6.43	CAEEL	1			0	1	1	35800	0	O76571	0.5	1	7.69	51	51.1
0	0	35800
0	0	1	1	1	31791.1	9.38	CAEEL	1			0	1	1	67500	0	G5EFI9	3.2	1	7.66	52	52.1
0	0	67500
0	0	1	1	1	55502.8	6.31	CAEEL	1			0	1	1	95100	0	Q09989	1.6	1	7.66	53	53.1
0	0	95100
1	0	0	1	1	46529.3	8.77	CAEEL	1			0	1	1	61100	0	Q19683	4.6	1	7.64	54	54.1
61100	0	0
1	0	0	1	1	94171.3	6.19	CAEEL	1			0	1	1	50400	0	O17744	2.4	1	7.6	55	55.1
50400	0	0
1	0	0	1	1	11421.3	10.29	CAEEL	1			0	1	1	15800	0	Q9U374	9.4	1	7.57	56	56.1
15800	0	0
0	0	1	1	1	470738	6.25	CAEEL	1			0	1	1	4160	0	G5EEV2	0.2	1	7.55	57	57.1
0	0	4160
1	0	0	1	1	29261.6	9.19	CAEEL	1			0	1	1	252000	0	O62427	1.9	1	7.54	58	58.1
252000	0	0
0	1	0	1	1	25585.2	7.85	CAEEL	1			0	1	1	10600	0	Q22459	5.8	1	7.46	59	59.1
0	10600	0
0	0	1	1	1	73900.3	5.78	CAEEL	1			0	1	1	6440	0	Q93550	2	1	7.44	60	60.1
0	0	6440
1	0	0	1	1	117348	8.47	CAEEL	1			0	1	1	2080	0	Q19204	0.8	1	7.42	61	61.1
2080	0	0
1	0	0	1	1	55918	9.33	CAEEL	1			0	1	1	3740	0	H2L0R7	1.2	1	7.39	62	62.1
3740	0	0
0	1	0	1	1	261793	6.3	CAEEL	1			0	1	1	6450	0	G5EC55	0.2	1	7.34	63	63.1
0	6450	0
0	0	1	1	1	38859.7	8.91	CAEEL	1			0	1	1	18200	0	A9D7R4	1.5	1	7.33	64	64.1
0	0	18200
0	1	0	1	1	128008	9.33	CAEEL	1			0	1	1	3510	0	Q9BKX2	0.6	1	7.33	65	65.1
0	3510	0
0	1	0	1	1	96496.2	8.47	CAEEL	1			0	1	1	2270	0	Q8MXV8	1.5	1	7.29	66	66.1
0	2270	0
0	1	0	1	1	71827.1	6.18	CAEEL	1			0	1	1	17500	0	O45402	1.4	1	7.28	67	67.1
0	17500	0
0	1	2	2	3	13532.4	6.64	CAEEL	1			0	1	5	103000	0	Q09506	15.3	1	7.25	68	68.1
0	53800	99100
1	0	0	1	1	22680.7	5.81	CAEEL	1			0	1	1	9660	0	Q17819	10.3	1	7.24	69	69.1
9660	0	0
0	1	0	1	1	89189.6	5.07	CAEEL	1			0	1	1	944	0	P24612	2	1	7.16	70	70.1
0	944	0
0	1	0	1	1	40448.5	10.01	CAEEL	1			0	1	1	927	0	O62258	2.7	1	7.11	71	71.1
0	927	0
0	1	0	1	1	25041.7	9.33	CAEEL	1			0	1	1	12200	0	P91033	6.1	1	7.11	72	72.1
0	12200	0
1	1	0	2	2	108004	6.23	CAEEL	1			0	1	2	47900	0	Q4TT88	1.4	1	7.1	73	73.1
14500	33400	0
1	0	1	2	2	35646.7	9.43	CAEEL	1			0	1	2	19300	0	Q7YXD2	2.2	1	7.1	74	74.1
8840	0	10500
0	0	1	1	1	48165.4	8.89	CAEEL	1			0	1	1	14200	0	Q95Y05	4.5	1	7.09	75	75.1
0	0	14200
0	0	1	1	1	24653.2	10.22	CAEEL	1			0	1	1	1200	0	I2HAF8	2.8	1	7.06	76	76.1
0	0	1200
0	0	1	1	1	254702	9.02	CAEEL	1			0	1	1	21900	0	A0A0K3AR10	0.5	1	6.89	77	77.1
0	0	21900
0	1	1	2	2	20816.7	6.16	CAEEL	1			0	1	2	25400	0	A0A0K3ARZ8	7.7	1	6.88	78	78.1
0	10600	14800
2	0	2	2	4	91269.8	9.37	CAEEL	1			0	1	4	1040000	0	O61794	0.9	1	6.86	79	79.1
506000	0	531000
1	0	0	1	1	24769.6	6.51	CAEEL	1			0	1	1	47300	0	Q9XVJ3	5.5	1	6.72	80	80.1
47300	0	0
0	1	0	1	1	45624.6	9.51	CAEEL	1			0	1	1	122000	0	Q8ITY6	5.1	1	6.65	81	81.1
0	122000	0
0	0	1	1	1	20595.3	9.56	CAEEL	1			0	1	1	9510	0	Q27GV2	6.9	1	6.63	82	82.1
0	0	9510
0	0	1	1	1	42523.7	10.31	CAEEL	1			0	1	1	30700	0	Q7YXB5	3.9	1	6.58	83	83.1
0	0	30700
0	1	0	1	1	48273.5	6.91	CAEEL	1			0	1	1	16000	0	P34454	1.9	1	6.48	84	84.1
0	16000	0
0	0	1	1	1	149921	4.91	CAEEL	1			0	1	1	21900	0	P34544	0.9	1	6.47	85	85.1
0	0	21900
0	0	1	1	1	100486	4.58	CAEEL	1			0	1	1	18100	0	A0A1I6CMA1	1	1	6.35	86	86.1
0	0	18100
0	1	0	1	1	218796	6.52	CAEEL	1			0	1	1	1420	0	K7ZUR1	0.6	1	6.27	87	87.1
0	1420	0
1	0	0	1	1	66865	9.84	CAEEL	1			0	1	1	3270	0	Q9N534	1.3	1	6.22	88	88.1
3270	0	0
0	1	0	1	1	37978.9	7.82	CAEEL	1			0	1	1	403000	0	H2KZ70	1.8	1	6.13	89	89.1
0	403000	0
0	0	1	1	1	48062.5	5.31	CAEEL	1			0	1	1	10700	0	Q17431	4.8	1	6.11	90	90.1
0	0	10700
0	1	0	1	1	46443.1	5.79	CAEEL	1			0	1	1	10600	0	Q18680	3.7	1	6.11	91	91.1
0	10600	0
0	0	1	1	1	28905.6	4.86	CAEEL	1			0	1	1	7870	0	A0A0K3AWR8	2.7	1	6.01	92	92.1
0	0	7870
0	1	0	1	1	47395.6	5.89	CAEEL	1			0	1	1	55700	0	Q22419	2.7	1	6.01	93	93.1
0	55700	0
1	0	0	1	1	94579	7.48	CAEEL	1			0	1	1	7350	0	O01978	2.3	1	5.98	94	94.1
7350	0	0
0	0	1	1	1	53939.5	4.21	CAEEL	1			0	1	1	1180	0	P49595	2	1	5.93	95	95.1
0	0	1180
0	0	1	1	1	72898.9	8.89	CAEEL	1			0	1	1	36600	0	Q03564	1.8	1	5.93	96	96.1
0	0	36600
0	0	1	1	1	68881.6	6.11	CAEEL	1			0	1	1	35800	0	G1K108	0.8	1	5.92	97	97.1
0	0	35800
0	1	0	1	1	30976.8	5.31	CAEEL	1			0	1	1	10600	0	P91061	5.1	1	5.86	98	98.1
0	10600	0
0	1	0	1	1	86886	9.57	CAEEL	1			0	1	1	4680	0	Q21026	1.8	1	5.83	99	99.1
0	4680	0
0	0	1	1	1	49490	6.02	CAEEL	1			0	1	1	9450	0	Q21037	3	1	5.83	100	100.1
0	0	9450
0	1	0	1	1	57696.9	5.52	CAEEL	1			0	1	1	2130	0	P46561	2.7	1	5.78	101	101.1
0	2130	0
0	1	0	1	1	37959.1	9.98	CAEEL	1			0	1	1	99900	0	F5GU62	2.1	1	5.76	102	102.1
0	99900	0
0	1	0	1	1	78094	7.74	CAEEL	1			0	1	1	6220	0	Q86NJ9	1.4	1	5.76	103	103.1
0	6220	0
1	0	1	2	2	78385	9.23	CAEEL	1			0	1	2	45200	0	Q8MNV7	1.8	1	5.76	104	104.1
14500	0	30700
0	1	0	1	1	110130	8.96	CAEEL	1			0	1	1	25200	0	Q95YF1	0.9	1	5.76	105	105.1
0	25200	0
1	0	0	1	1	28601.3	9.81	CAEEL	1			0	1	1	1930	0	C7IVR7	4.5	1	5.69	106	106.1
1930	0	0
1	0	0	1	1	30816.4	5.49	CAEEL	1			0	1	1	3650	0	P46769	2.8	1	5.68	107	107.1
3650	0	0
0	1	0	1	1	29277.8	9.15	CAEEL	1			0	1	1	18100	0	Q9N4C7	4.7	1	5.66	108	108.1
0	18100	0
1	0	0	1	1	95039.4	9.07	CAEEL	1			0	1	1	11900	0	Q23141	1.1	1	5.56	109	109.1
11900	0	0
0	0	1	1	1	59968.5	9.35	CAEEL	1			0	1	1	26100	0	Q93834	2.7	1	5.56	110	110.1
0	0	26100
0	0	1	1	1	61886.5	6.33	CAEEL	1			0	1	1	27300	0	Q9BIB7	3.4	1	5.56	111	111.1
0	0	27300
1	0	0	1	1	81594.8	6.04	CAEEL	1			0	1	1	8450	0	Q22145	1.2	1	5.55	112	112.1
8450	0	0
0	1	0	1	1	152209	4.71	CAEEL	1			0	1	1	1600	0	D0Z5P0	0.9	1	5.52	113	113.1
0	1600	0
0	0	1	1	1	19640.2	9.49	CAEEL	1			0	1	1	1830	0	O61822	4	1	5.48	114	114.1
0	0	1830
1	0	0	1	1	204526	6.34	CAEEL	1			0	1	1	4530	0	G5EEV7	0.6	1	5.43	115	115.1
4530	0	0
0	1	1	2	2	71024.6	5.48	CAEEL	1			0	1	2	4480	0	Q21374	1.4	1	5.38	116	116.1
0	1800	2680
0	1	0	1	1	13591.5	11.82	CAEEL	1			0	1	1	1730	0	O45499	7.6	1	5.35	117	117.1
0	1730	0
1	0	0	1	1	307594	5.32	CAEEL	1			0	1	1	10200	0	Q5F4W0	0.6	1	5.35	118	118.1
10200	0	0
1	0	1	2	2	29865.5	9.33	CAEEL	1			0	1	2	17500	0	Q23142	3.9	1	5.31	119	119.1
9560	0	7960
1	0	0	1	1	32336.3	9.86	CAEEL	1			0	1	1	1370	0	A0A3P6MYB5	4.2	1	5.3	120	120.1
1370	0	0
0	0	1	1	1	52967.9	6.45	CAEEL	1			0	1	1	2940	0	Q09579	1.9	1	5.26	121	121.1
0	0	2940
0	0	1	1	1	96601	5.38	CAEEL	1			0	1	1	92000	0	A5Z2T6	0.8	1	5.25	122	122.1
0	0	92000
0	0	1	1	1	136188	9.04	CAEEL	1			0	1	1	11000	0	D7SFK4	1.5	1	5.22	123	123.1
0	0	11000
0	1	0	1	1	67170.3	8.57	CAEEL	1			0	1	1	20600	0	Q9U2C4	1.8	1	5.11	124	124.1
0	20600	0
0	1	0	1	1	164445	7.19	CAEEL	1			0	1	1	68500	0	G5EDU3	0.4	1	5.08	125	125.1
0	68500	0
1	0	0	1	1	40860	5.86	CAEEL	1			0	1	1	120000	0	Q17930	5.4	1	5.08	126	126.1
120000	0	0
1	0	0	1	1	83901.3	5.91	CAEEL	1			0	1	1	4720	0	O01514	1.8	1	5.05	127	127.1
4720	0	0
0	1	0	1	1	46291.1	8.47	CAEEL	1			0	1	1	1350	0	Q7JP68	1.7	1	5.05	128	128.1
0	1350	0
1	0	0	1	1	32418.1	9.5	CAEEL	1			0	1	1	11900	0	G5EDV3	3.4	1	5.02	129	129.1
11900	0	0
0	1	0	1	1	50987	9.04	CAEEL	1			0	1	1	2420	0	G5ECJ3	3	1	4.97	130	130.1
0	2420	0
1	0	0	1	1	23809.2	11.19	CAEEL	1			0	1	1	1350	0	P91128	2.8	1	4.93	131	131.1
1350	0	0
0	1	0	1	1	54323	9.43	CAEEL	1			0	1	1	44900	0	Q11179	2.7	1	4.89	132	132.1
0	44900	0
1	0	0	1	1	37131.9	9.04	CAEEL	1			0	1	1	7710	0	Q19584	3.8	1	4.87	133	133.1
7710	0	0
0	1	0	1	1	27427.8	6.67	CAEEL	1			0	1	1	1800	0	Q7YWY4	3.9	1	4.84	134	134.1
0	1800	0
1	0	0	1	1	37952.6	6.39	CAEEL	1			0	1	1	89600	0	Q22031	2	1	4.79	135	135.1
89600	0	0
0	0	1	1	1	34895.5	6.4	CAEEL	1			0	1	1	2550	0	P91530	3	1	4.78	136	136.1
0	0	2550
1	0	0	1	1	52977.6	5.23	CAEEL	1			0	1	1	1340	0	O18000	3.3	1	4.75	137	137.1
1340	0	0
0	1	0	1	1	53399.6	5.44	CAEEL	1			0	1	1	4270	0	K8ESD4	2.6	1	4.72	138	138.1
0	4270	0
0	1	0	1	1	24703.1	9.55	CAEEL	1			0	1	1	966	0	O17040	3.2	1	4.66	139	139.1
0	966	0
0	1	0	1	1	147805	9.05	CAEEL	1			0	1	1	110000	0	G5EG61	0.9	1	4.61	140	140.1
0	110000	0
0	0	1	1	1	65819.9	6.62	CAEEL	1			0	1	1	784	0	Q23535	2	1	4.6	141	141.1
0	0	784
0	1	0	1	1	159112	5.72	CAEEL	1			0	1	1	44900	0	Q93520	0.8	1	4.58	142	142.1
0	44900	0
0	1	0	1	1	11770.5	6.11	CAEEL	1			0	1	1	18100	0	Q8MPX7	12.5	1	4.53	143	143.1
0	18100	0
1	0	0	1	1	22539.5	6.78	CAEEL	1			0	1	1	90400	0	Q9TXI3	3.4	1	4.46	144	144.1
90400	0	0
1	0	0	1	1	35703.1	8.85	CAEEL	1			0	1	1	1360	0	M1ZJS7	5.2	1	4.45	145	145.1
1360	0	0
1	0	0	1	1	20749.8	9.7	CAEEL	1			0	1	1	2960	0	A0A0K3ARL4	6.3	1	4.44	146	146.1
2960	0	0
1	0	0	1	1	29296.6	9.74	CAEEL	1			0	1	1	3350	0	Q18934	2.2	1	4.32	147	147.1
3350	0	0
0	0	1	1	1	60142.4	6.92	CAEEL	1			0	1	1	26300	0	B1Q250	1.3	1	4.3	148	148.1
0	0	26300
0	1	0	1	1	80126.6	8.61	CAEEL	1			0	1	1	110000	0	Q18563	2.1	1	4.28	149	149.1
0	110000	0
0	0	1	1	1	43876	9.89	CAEEL	1			0	1	1	7910	0	Q7YTI1	2.1	1	4.27	150	150.1
0	0	7910
0	0	1	1	1	39660.4	4.67	CAEEL	1			0	1	1	401000	0	G5EF11	1.7	1	4.23	151	151.1
0	0	401000
1	0	0	1	1	138396	9.37	CAEEL	1			0	1	1	1490	0	A0A1N7SYS6	0.5	1	4.17	152	152.1
1490	0	0
1	0	0	1	1	41899	9.26	CAEEL	1			0	1	1	18300	0	Q95Y07	3.6	1	4.16	153	153.1
18300	0	0
0	0	1	1	1	48867.2	9.7	CAEEL	1			0	1	1	5590	0	Q22518	2.8	1	4.15	154	154.1
0	0	5590
1	0	0	1	1	24266.8	9.08	CAEEL	1			0	1	1	2820	0	Q17798	3.3	1	4.14	155	155.1
2820	0	0
1	0	0	1	1	122869	5.62	CAEEL	1			0	1	1	21200	0	Q18289	0.9	1	4.14	156	156.1
21200	0	0
0	0	1	1	1	131395	5.76	CAEEL	1			0	1	1	1730	0	G4RXT9	1.3	1	4.13	157	157.1
0	0	1730
0	1	0	1	1	39087.4	7.04	CAEEL	1			0	1	1	5180	0	P91321	2.6	1	4.12	158	158.1
0	5180	0
0	0	1	1	1	559947	5.13	CAEEL	1			0	1	1	67500	0	A0A1N7SYN7	0.1	1	4.11	159	159.1
0	0	67500
1	0	0	1	1	64906.7	6.92	CAEEL	1			0	1	1	18300	0	Q95QR2	2.4	1	4.11	160	160.1
18300	0	0
0	0	1	1	1	92875.8	9.44	CAEEL	1			0	1	1	6600	0	Q19046	0.9	1	4.06	161	161.1
0	0	6600
0	0	1	1	1	52934.4	9.24	CAEEL	1			0	1	1	4940	0	Q23675	4.3	1	4.06	162	162.1
0	0	4940
0	1	0	1	1	93100.3	5.76	CAEEL	1			0	1	1	3360	0	G5ED52	1.3	1	4.03	163	163.1
0	3360	0
0	0	1	1	1	39445	4.8	CAEEL	1			0	1	1	2930	0	H2KZL8	2.5	1	4.01	164	164.1
0	0	2930
1	0	0	1	1	46791.3	5.98	CAEEL	1			0	1	1	28700	0	Q18020	2.5	1	3.91	165	165.1
28700	0	0
0	1	0	1	1	78744.2	8.92	CAEEL	1			0	1	1	1130	0	Q19585	2	1	3.91	166	166.1
0	1130	0
0	0	1	1	1	38819.3	9.54	CAEEL	1			0	1	1	49500	0	Q9GS11	5	1	3.89	167	167.1
0	0	49500
0	0	1	1	1	39447	9.91	CAEEL	1			0	1	1	2930	0	Q9XV83	2.4	1	3.88	168	168.1
0	0	2930
1	1	0	2	2	431424	6.89	CAEEL	1			0	1	2	13600	0	A0A078BQN0	0.3	1	3.86	169	169.1
6590	6980	0
0	1	0	1	1	32102.7	6.84	CAEEL	1			0	1	1	9760	0	Q20742	3.4	1	3.85	170	170.1
0	9760	0
0	0	1	1	1	17316.1	10.71	CAEEL	1			0	1	1	1160	0	P51404	4.6	1	3.82	171	171.1
0	0	1160
0	1	0	1	1	106396	6.18	CAEEL	1			0	1	1	6560	0	G5EBX0	0.6	1	3.78	172	172.1
0	6560	0
0	1	0	1	1	73889.7	5.74	CAEEL	1			0	1	1	3320	0	H2KZ08	1.4	1	3.59	173	173.1
0	3320	0
0	1	0	1	1	70195.4	6.18	CAEEL	1			0	1	1	109000	0	P34329	0.9	1	3.58	174	174.1
0	109000	0
0	0	1	1	1	95989.7	5.29	CAEEL	1			0	1	1	3650	0	A0A163UTE6	1.6	1	3.56	175	175.1
0	0	3650
0	0	1	1	1	259005	7.15	CAEEL	1			0	1	1	1940	0	Q11107	0.3	1	3.47	176	176.1
0	0	1940
1	0	0	1	1	33385.5	9.76	CAEEL	1			0	1	1	19400	0	P49405	2.3	1	3.46	177	177.1
19400	0	0
0	1	0	1	1	29003.3	9.04	CAEEL	1			0	1	1	4100	0	Q9N5U6	3.6	1	3.46	178	178.1
0	4100	0
0	1	0	1	1	17905.7	4.89	CAEEL	1			0	1	1	28200	0	Q22790	8.3	1	3.42	179	179.1
0	28200	0
0	0	1	1	1	21455.2	4.29	CAEEL	1			0	1	1	1230	0	P91226	7.8	1	3.38	180	180.1
0	0	1230
1	0	0	1	1	50875.8	6.78	CAEEL	1			0	1	1	29500	0	Q23620	2	1	3.33	181	181.1
29500	0	0
0	1	0	1	1	104499	6.73	CAEEL	1			0	1	1	7590	0	A0A131MCD3	1.1	1	3.16	182	182.1
0	7590	0
0	0	1	1	1	83795.7	9.65	CAEEL	1			0	1	1	12000	0	Q20538	1.3	1	3.16	183	183.1
0	0	12000
0	1	0	1	1	33463.3	9.64	CAEEL	1			0	1	1	1280	0	C8JQQ7	2.7	1	3.13	184	184.1
0	1280	0
0	0	1	1	1	54501	8.86	CAEEL	1			0	1	1	37400	0	Q20085	1.9	1	3.1	185	185.1
0	0	37400
0	1	0	1	1	28839.2	5.55	CAEEL	1			0	1	1	23600	0	Q23450	2.4	1	3.08	186	186.1
0	23600	0
1	0	0	1	1	42583.4	9.4	CAEEL	1			0	1	1	384000	0	O61821	1.9	1	3.07	187	187.1
384000	0	0
0	0	1	1	1	76883.9	6.24	CAEEL	1			0	1	1	7960	0	O01686	1.3	1	3	188	188.1
0	0	7960
0	1	0	1	1	308806	8.94	CAEEL	1			0	1	1	79300	0	Q95Q95	0.2	1	2.89	189	189.1
0	79300	0
1	0	0	1	1	68225.4	6.29	CAEEL	1			0	1	1	5020	0	Q9U3P9	1.3	1	2.81	190	190.1
5020	0	0
1	0	0	1	1	98083.7	5.4	CAEEL	1			0	1	1	27600	0	A0A0K3AUK6	0.9	1	2.77	191	191.1
27600	0	0
0	1	0	1	1	121854	4.63	CAEEL	1			0	1	1	99900	0	G5EC33	0.6	1	2.62	192	192.1
0	99900	0
0	0	1	1	1	15396.9	9.66	CAEEL	1			0	1	1	14900	0	Q7YWN2	5.9	1	2.6	193	193.1
0	0	14900
0	0	1	1	1	53463.6	5.01	CAEEL	1			0	1	1	27300	0	Q19101	3.8	1	2.57	194	194.1
0	0	27300
0	0	1	1	1	61614	5.46	CAEEL	1			0	1	1	4630	0	O44400	1.2	1	2.52	195	195.1
0	0	4630
0	0	1	1	1	104287	6.75	CAEEL	1			0	1	1	2680	0	P90897	1.2	1	2.39	196	196.1
0	0	2680
0	1	0	1	1	10458.7	6.09	CAEEL	1			0	1	1	7140	0	Q22337	14.4	1	2.39	197	197.1
0	7140	0
1	0	0	1	1	90234.9	5.36	CAEEL	1			0	1	1	2010	0	A3QM97	0.8	1	2.23	198	198.1
2010	0	0
0	1	0	1	1	205083	5.16	CAEEL	1			0	1	1	32600	0	O44565	0.5	1	2.17	199	199.1
0	32600	0
0	0	1	1	1	22635.2	6.42	CAEEL	1			0	1	1	142000	0	Q17984	4.8	1	2.13	200	200.1
0	0	142000
0	0	1	1	1	78239.1	7.2	CAEEL	1			0	1	1	28000	0	Q22416	2	1	1.27	201	201.1
0	0	28000
0	0	1	1	1	48828.1	9.28	CAEEL	1			0	1	1	14900	0	Q17817	1.8	1	1.03	202	202.1
0	0	14900
0	0	1	1	1	153879	5.42	CAEEL	1			0	1	1	1660	0	Q19272	0.7	1	0.81	203	203.1
0	0	1660
0	0	1	1	1	64573.3	8.62	CAEEL	1			0	1	1	30400	0	P30642	1.4	1	0.77	204	204.1
0	0	30400
1	0	0	1	1	135533	5.78	CAEEL	1			0	1	1	31900	0	A0A0S4XR43	1.1	1	0.64	205	205.1
31900	0	0
0	0	1	1	1	282547	5.29	CAEEL	1			0	1	1	969	0	G4S034	0.4	1	0.4	206	206.1
0	0	969
0	1	0	1	1	7806.6	9.43	CAEEL	1			0	1	1	1640	0	U4PS55	21.4	1	0.19	207	207.1
0	1640	0
