# Supplementary material for: Cronobacter sakazakii infection implicates multifaceted neuro-immune regulatory pathways of Caenorhabditis elegans
Source: Royal Society of Chemistry journal article supplement (doi:10.1039/d3mo00167a), 2023-09-28
Supplement: d3mo00167a4.xlsx [file d3mo00167a4.xlsx]

## Sheet: Protein Summary Details
Spectrum Mill - Protein Peptide/Summary
Results Shown Filtered by Validation Category: sequence-not-validated
Data Directory: msdataSM\ECOLIOP5048HA - SpecFeatures read
Retrieving all hits from tagSummary file.
all hits read from tagSummary file num hits: 139
original hits subset determined from files: 76 Files: 76 Hits: 138
Data Directory: msdataSM\ECOLIOP5048HB - SpecFeatures read
Retrieving all hits from tagSummary file.
all hits read from tagSummary file num hits: 142
original hits subset determined from files: 82 Files: 82 Hits: 139
Data Directory: msdataSM\ECOLIOP5048HC - SpecFeatures read
Retrieving all hits from tagSummary file.
all hits read from tagSummary file num hits: 124
original hits subset determined from files: 75 Files: 75 Hits: 121
beginning to assemble proteins .... proteins assembled 0.012281 sec
proteins filtered by distinct peptides 0.004631 sec
proteins filtered by score
calculated protein coverage maps 0.084135 sec
beginning to roll up 280 proteins into groups ...
Sorted peptides by length to accelerate peptide roll up 0.00398 sec
completed primary peptide roll up 2702 sequence comparisons 0.044484 sec
completed post roll up subgrouping and sorting 0.00357 sec
Finished protein roll up into 174 groups 0.052937 sec
protein groups ready for display
proteinGroupingMethod: oneSharedPeptideSubgrouped Subgroups expanded 6.62e-002 sec
174 Protein Groups listed - Total Proteins: 279
Group	Subgroup	Spectra	Distinct	Distinct	% AA	Total	Protein MW	Protein	Species	Database	Protein Name
(#)	(#)	(#)	Peptides	Summed	Coverage	Protein	(Da)	pI		Accession #
			(#)	MS/MS Search		Spectral
				Score		Intensity
1	1.1	5	3	21.09	5	27700	42157.4	5.44	CAEEL	O45815	ACTin
1	1.1	5	3	21.09	5	27700	42137.4	5.3	CAEEL	P0DM41	Actin-1
1	1.1	5	3	21.09	5	27700	42137.4	5.3	CAEEL	P0DM42	Actin-3
1	1.1	5	3	21.09	5	27700	42119.3	5.29	CAEEL	P10984	Actin-2
1	1.1	5	3	21.09	5	27700	42119.3	5.3	CAEEL	P10986	Actin-4
1	1.1	5	3	21.09	5.2	27700	40653.7	5.56	CAEEL	Q6A8K1	Actin-4
1	1.1	5	3	21.09	5.7	27700	37506.2	5.37	CAEEL	Q95ZL1	Actin-4
1	1.1	2	1	9.15	2.7	12200	24153.3	6.3	CAEEL	Q22963	Uncharacterized protein
1	1.1	1	1	7.14	1.5	7960	45239.3	6.15	CAEEL	P53489	Actin-related protein 2
2	2.1	4	1	14.2	1.2	1550000	53610.1	6.17	CAEEL	Q09400	Uncharacterized protein F58F12.3
3	3.1	5	1	13.89	1	554000	63688.4	5.62	CAEEL	Q9N4P3	Uncharacterized protein
4	4.1	3	1	13.26	5.4	507000	40860	5.86	CAEEL	Q17930	Uncharacterized protein
5	5.1	3	1	12.46	3.2	442000	31791.1	9.38	CAEEL	G5EFI9	Checkpoint protein
6	6.1	1	1	11.86	0.9	127000	107910	6.63	CAEEL	H2L2D1	Soluble guanylate cyclase gcy-33
6	6.1	1	1	11.86	0.9	127000	107740	6.63	CAEEL	P90895	Soluble guanylate cyclase gcy-33
7	7.1	1	1	11.76	0.6	42300	164186	5.9	CAEEL	P90757	Uncharacterized protein
8	8.1	3	2	11.45	5.4	284000	54245.5	8.35	CAEEL	Q27512	Annexin
8	8.1	3	2	11.45	5.9	284000	49729.6	7.75	CAEEL	Q7JMT5	Annexin
9	9.1	2	1	11.19	0.9	315000	109608	4.37	CAEEL	Q09560	Uncharacterized protein F36G3.1
10	10.1	2	1	11.09	1.9	305000	46457.4	9.96	CAEEL	B3WFV2	GLoBin related
11	11.1	3	1	10.97	2.7	213000	74997.9	8.26	CAEEL	O62139	Acyl-coenzyme A oxidase
12	12.1	1	1	10.65	3.3	38500	72907.1	9.5	CAEEL	Q9XXN2	MICOS complex subunit MIC60-2
13	13.1	1	1	10.06	2.9	1130	31842.5	9.48	CAEEL	Q93438	Uncharacterized protein
14	14.1	1	1	10.02	2.9	1930	51197.2	6.06	CAEEL	Q9U2K7	SNAPc (Small Nuclear RNA Activating Complex) homolog
15	15.1	3	1	9.92	4.3	155000	61967	9.57	CAEEL	Q95Y89	Pescadillo homolog
16	16.1	1	1	9.75	5.5	406000	16299	5.52	CAEEL	P02513	Heat shock protein Hsp-16.48/Hsp-16.49
16	16.1	1	1	9.75	5.5	406000	16252	5.94	CAEEL	P06581	Heat shock protein Hsp-16.41
17	17.1	1	1	9.38	1.4	42300	68040.6	8.71	CAEEL	Q21406	Uncharacterized protein
18	18.1	1	1	9.35	2.1	7020	122816	6.79	CAEEL	E7EAU8	Receptor-type guanylate cyclase gcy-9
19	19.1	3	1	9.28	1.5	1060000	55695.2	11.42	CAEEL	Q09633	RNase H
20	20.1	1	1	9.12	4.8	82000	26738.2	8.71	CAEEL	P90779	Uncharacterized protein
21	21.1	1	1	9.03	3	12700	73829.8	10.03	CAEEL	G5ED64	Uncharacterized protein
22	22.1	3	1	8.92	3.6	358000	26312.5	9.74	CAEEL	A0A0K3AWR5	Uncharacterized protein
22	22.1	3	1	8.92	1.8	358000	50815.8	9.18	CAEEL	A4F336	Uncharacterized protein
23	23.1	3	1	8.82	0.1	24500	461741	5.2	CAEEL	H2L075	KETtiN (Drosophila actin-binding) homolog
23	23.1	3	1	8.82	0.1	24500	474320	5.25	CAEEL	Q5PY59	KETtiN (Drosophila actin-binding) homolog
23	23.1	3	1	8.82	0.1	24500	469691	5.23	CAEEL	Q8MXD8	KETtiN (Drosophila actin-binding) homolog
23	23.1	3	1	8.82	0.1	24500	471245	5.32	CAEEL	Q9NL87	KETtiN (Drosophila actin-binding) homolog
23	23.1	3	1	8.82	0.1	24500	553088	5.47	CAEEL	V6CJB8	KETtiN (Drosophila actin-binding) homolog
23	23.1	3	1	8.82	0.1	24500	482938	5.27	CAEEL	V6CKH1	KETtiN (Drosophila actin-binding) homolog
23	23.1	3	1	8.82	0.1	24500	557717	5.48	CAEEL	V6CLP5	KETtiN (Drosophila actin-binding) homolog
23	23.1	3	1	8.82	0.1	24500	544469	5.45	CAEEL	V6CLT3	KETtiN (Drosophila actin-binding) homolog
23	23.1	3	1	8.82	0.1	24500	549098	5.46	CAEEL	V6CLU0	KETtiN (Drosophila actin-binding) homolog
23	23.1	3	1	8.82	0.1	24500	478309	5.26	CAEEL	V6CLU5	KETtiN (Drosophila actin-binding) homolog
24	24.1	1	1	8.78	1.2	3840	56832.6	4.88	CAEEL	Q18377	Uncharacterized protein
25	25.1	3	1	8.78	9.4	255000	11421.3	10.29	CAEEL	Q9U374	Uncharacterized protein
26	26.1	1	1	8.57	2.8	9110	68832.6	5.78	CAEEL	Q19266	Protein kinase C-like 3
27	27.1	1	1	8.56	0.4	3590	262699	7.01	CAEEL	A0A1D3PCL8	Uncharacterized protein
27	27.1	1	1	8.56	0.3	3590	295350	7.48	CAEEL	A0A1D3PCM5	Uncharacterized protein
27	27.1	1	1	8.56	0.3	3590	297243	7.35	CAEEL	Q20937	NTL-1a
27	27.1	1	1	8.56	0.5	3590	210045	8.11	CAEEL	S5ZDJ9	NTL-1b
28	28.1	1	1	8.55	2.9	7940	22641.4	9.43	CAEEL	Q19022	Uncharacterized protein
29	29.1	1	1	8.54	5.6	16700	42601.6	6.06	CAEEL	O45518	ARGinine Kinase
30	30.1	1	1	8.41	2.8	79500	29126.7	6.24	CAEEL	Q19812	Uncharacterized protein
31	31.1	1	1	8.4	5.1	14300	52854	6.12	CAEEL	Q18453	Uncharacterized protein
32	32.1	1	1	8.33	3.9	244000	32727.4	9.31	CAEEL	G5ECX9	CaDmium Responsive
33	33.1	1	1	8.3	6.3	6090	23805.9	10.02	CAEEL	Q22415	Uncharacterized protein
34	34.1	1	1	8.13	3.5	2680	37723.7	5.26	CAEEL	G3MU65	Uncharacterized protein
34	34.1	1	1	8.13	3.5	2680	37851.9	5.33	CAEEL	Q9XV33	Uncharacterized protein
35	35.1	1	1	8.09	1.9	63000	114011	9.2	CAEEL	Q9U3H5	Uncharacterized protein
36	36.1	1	1	7.98	4.8	8910	40988.3	8.62	CAEEL	O17609	Uncharacterized protein
37	37.1	1	1	7.96	11.5	8220	17221.4	10.08	CAEEL	Q9BKQ9	CDGSH Iron Sulfur Domain protein homolog
38	38.1	1	1	7.92	4.1	1210	40814	9.22	CAEEL	B3GWD2	Uncharacterized protein
38	38.1	1	1	7.92	3.5	1210	48453.8	9.57	CAEEL	Q93232	Uncharacterized protein
39	39.1	1	1	7.82	1	36300	206849	5.42	CAEEL	Q22516	Chromodomain-helicase-DNA-binding protein 3 homolog
40	40.1	1	1	7.76	1.8	91700	31638.6	11.14	CAEEL	P18832	Cuticle collagen 7
40	40.1	1	1	7.76	1.8	91700	31630.6	11.14	CAEEL	Q93207	COLlagen
41	41.1	2	1	7.62	12.7	475000	16559.7	9.57	CAEEL	Q4W4Z8	Uncharacterized protein
42	42.1	1	1	7.6	6.9	38600	18651.3	9.52	CAEEL	P34361	Uncharacterized protein C48B4.7
43	43.1	1	1	7.6	1.9	906	63364.7	9.01	CAEEL	P34424	Cyclin-T1.2
44	44.1	1	1	7.49	1.5	53000	171677	5.95	CAEEL	G5ED98	PIP Kinase
45	45.1	1	1	7.49	3.3	8710	71504.2	8.61	CAEEL	Q17492	Uncharacterized protein
46	46.1	1	1	7.42	2.2	60500	60171.4	9.56	CAEEL	Q20720	Uncharacterized protein
47	47.1	1	1	7.37	1.8	56600	49383.2	5.14	CAEEL	D1YSH6	Uncharacterized protein
47	47.1	1	1	7.37	1.5	56600	58893.7	4.89	CAEEL	H2KYF5	Uncharacterized protein
48	48.1	2	1	7.35	1.8	95300	74303.1	9.33	CAEEL	Q9TYV5	NucleOLar protein
49	49.1	1	1	7.34	5.1	33400	50156.3	5.86	CAEEL	P34475	Tubulin gamma chain
50	50.1	1	1	7.3	1.3	4110	59173.1	7.93	CAEEL	G5EDC7	PRogression Of Meiosis
51	51.1	2	1	7.3	4.6	148000	46529.3	8.77	CAEEL	Q19683	Uncharacterized protein F21D5.5
52	52.1	2	1	7.27	3.9	69400	61557.2	7.79	CAEEL	O17828	piRNA biogenesis factor prde-1
53	53.1	4	1	7.23	1.6	536000	55502.8	6.31	CAEEL	Q09989	SynDaPiN (Synaptic dynamin binding protein) homolog
53	53.1	4	1	7.23	1.6	536000	56251.7	6.31	CAEEL	Q6AHQ8	SynDaPiN (Synaptic dynamin binding protein) homolog
54	54.1	1	1	7.05	2	369000	32029.6	9.61	CAEEL	O62347	SLC (SoLute Carrier) homolog
55	55.1	4	1	7.04	15.3	63900	13532.4	6.64	CAEEL	Q09506	Uncharacterized protein C45G9.7
56	56.1	1	1	6.98	1.1	10300	95039.4	9.07	CAEEL	Q23141	TRP-channel-Like
57	57.1	1	1	6.92	3.6	6800	76870	9.76	CAEEL	B5BM46	Numb-related protein 1
57	57.1	1	1	6.92	4.6	6800	59631.6	9.46	CAEEL	F1LIN5	Numb-related protein 1
57	57.1	1	1	6.92	4.2	6800	65965.7	9.72	CAEEL	Q9XTY6	Numb-related protein 1
58	58.1	1	1	6.87	1.4	1300	110225	6.39	CAEEL	Q18298	CUTiclin-Like
59	59.1	1	1	6.8	3.1	6260	58156.4	6.8	CAEEL	P41990	Anterior pharynx in excess protein 1
60	60.1	2	1	6.74	2.4	28900	101156	9.35	CAEEL	G5EC69	Tyrosine-protein phosphatase
60	60.1	2	1	6.74	2.6	28900	94085	9.45	CAEEL	G5ECI6	Tyrosine-protein phosphatase
60	60.1	2	1	6.74	3	28900	82222.9	9.25	CAEEL	G5EG42	Tyrosine-protein phosphatase
60	60.1	2	1	6.74	2.4	28900	99130.5	9.33	CAEEL	G5EGI0	Tyrosine-protein phosphatase
61	61.1	2	1	6.73	0.2	169000	287294	6.36	CAEEL	A0A061AJK8	Ankyrin repeat and KH domain-containing protein mask-1
61	61.1	2	1	6.73	0.2	169000	287074	6.36	CAEEL	A0A061AL89	Ankyrin repeat and KH domain-containing protein mask-1
61	61.1	2	1	6.73	0.2	169000	288728	6.36	CAEEL	Q21920	Ankyrin repeat and KH domain-containing protein mask-1
62	62.1	1	1	6.68	1.6	11300	95989.7	5.29	CAEEL	A0A163UTE6	Heavy chain, Unconventional Myosin
62	62.1	1	1	6.68	1.6	11300	96265	5.29	CAEEL	A0A168H541	Heavy chain, Unconventional Myosin
62	62.1	1	1	6.68	1.7	11300	91650.8	5.42	CAEEL	A0A168H5A5	Heavy chain, Unconventional Myosin
62	62.1	1	1	6.68	1.7	11300	91375.5	5.42	CAEEL	A0A168H5E2	Heavy chain, Unconventional Myosin
62	62.1	1	1	6.68	1.7	11300	89685.6	5.45	CAEEL	A0A168H5H9	Heavy chain, Unconventional Myosin
62	62.1	1	1	6.68	0.7	11300	208622	8.61	CAEEL	G8JY81	Heavy chain, Unconventional Myosin
62	62.1	1	1	6.68	0.7	11300	212110	8.98	CAEEL	Q17383	Hum-2
62	62.1	1	1	6.68	0.7	11300	208347	8.61	CAEEL	Q95ZU1	Heavy chain, Unconventional Myosin
63	63.1	1	1	6.66	2.8	5070	27025.1	9.81	CAEEL	G3MU69	Adenine Nucleotide Translocator
63	63.1	1	1	6.66	2.3	5070	33215.3	9.86	CAEEL	O45865	Adenine Nucleotide Translocator
64	64.1	1	1	6.59	2.5	153000	40667.8	7.83	CAEEL	O62116	Nuclear Hormone Receptor family
65	65.1	1	1	6.59	1.9	7060	37267.8	9.47	CAEEL	Q9N5I2	Uncharacterized protein
66	66.1	1	1	6.54	2.3	1010	56788.2	9.65	CAEEL	Q10048	SLC (SoLute Carrier) homolog
67	67.1	1	1	6.46	7.1	22900	20449.7	5.27	CAEEL	Q18567	SKp1 Related (Ubiquitin ligase complex component)
68	68.1	2	1	6.4	2.1	196000	37959.1	9.98	CAEEL	F5GU62	Uncharacterized protein
69	69.1	1	1	6.39	4	71700	31152.8	9.58	CAEEL	Q18611	Uncharacterized protein
70	70.1	1	1	6.29	1.6	16300	41540.5	7	CAEEL	Q19958	Stomatin-2
71	71.1	1	1	6.29	8.9	8870	29968.3	5.46	CAEEL	Q9N352	MADF domain transcription factor
72	72.1	1	1	6.27	2	4240	71888.4	5.87	CAEEL	P38433	Acetylcholinesterase 1
73	73.1	1	1	6.17	0.7	79400	114475	6.15	CAEEL	G5EFX2	Protein Kinase N (PKN) homolog
73	73.1	1	1	6.17	0.7	79400	128443	8.35	CAEEL	G5EGE3	Protein Kinase N (PKN) homolog
74	74.1	1	1	6.17	7.5	110000	11357	10.22	CAEEL	Q9BLC2	Uncharacterized protein
75	75.1	1	1	6.16	0.8	5070	77784.7	6.02	CAEEL	A0A2C9C2E8	ALG-1 INteracting protein
75	75.1	1	1	6.16	0.8	5070	73066.8	5.97	CAEEL	A0A2C9C2L0	ALG-1 INteracting protein
75	75.1	1	1	6.16	0.8	5070	77986.9	5.97	CAEEL	A0A2C9C358	ALG-1 INteracting protein
75	75.1	1	1	6.16	0.8	5070	79953	5.83	CAEEL	H2KY58	ALG-1 INteracting protein
75	75.1	1	1	6.16	0.8	5070	75014.8	5.77	CAEEL	H2KY59	ALG-1 INteracting protein
75	75.1	1	1	6.16	0.8	5070	74812.6	5.82	CAEEL	H2KY60	ALG-1 INteracting protein
75	75.1	1	1	6.16	0.8	5070	79750.8	5.88	CAEEL	Q95R18	ALG-1 INteracting protein
76	76.1	1	1	6.13	0.9	22900	182483	6.12	CAEEL	A0A061AKU0	Uncharacterized protein
76	76.1	1	1	6.13	0.9	22900	192811	6.09	CAEEL	G5ECL0	Uncharacterized protein
76	76.1	1	1	6.13	0.8	22900	199969	6	CAEEL	G5EFX3	Uncharacterized protein
76	76.1	1	1	6.13	0.9	22900	187238	6.05	CAEEL	N1NTK8	Uncharacterized protein
76	76.1	1	1	6.13	0.9	22900	188056	6.16	CAEEL	N1NVB8	Uncharacterized protein
77	77.1	1	1	6.08	1.5	6130	46506.9	9.74	CAEEL	O16663	Nuclear Hormone Receptor family
77	77.1	1	1	6.08	1.9	6130	35409.4	9.44	CAEEL	Q9XWM2	Uncharacterized protein
78	78.1	1	1	6.08	2.3	5730	39028.5	9.33	CAEEL	O44544	Seven TM Receptor
79	79.1	1	1	6.03	0.5	29000	135624	9.77	CAEEL	H2KYL8	TropoNin T
80	80.1	1	1	6.01	2.5	4090	47543.9	9.37	CAEEL	G8JY74	Elongation factor 1-alpha
80	80.1	1	1	6.01	2.3	4090	51123.9	9.35	CAEEL	P53013	Elongation factor 1-alpha
81	81.1	2	1	6	6.1	184000	25878.7	4.71	CAEEL	Q21069	Uncharacterized protein
82	82.1	1	1	5.98	2	6280	108764	5.4	CAEEL	Q19753	Uncharacterized protein F23B12.7
83	83.1	3	1	5.91	1.7	175000	51746.1	6.51	CAEEL	Q9TZE1	Uncharacterized protein
84	84.1	1	1	5.88	3.5	804	37173.8	6.22	CAEEL	O45329	F-box A protein
85	85.1	1	1	5.82	9.7	78700	15216.1	9.15	CAEEL	I2HA82	ACyLtransferase-like
86	86.1	1	1	5.81	1	3800	68439.8	5.49	CAEEL	Q95QN6	BRCA1-associated protein homolog 2
87	87.1	2	1	5.79	1.1	11300	136062	9.56	CAEEL	Q23260	Myosin Light Chain Kinase related
88	88.1	1	1	5.78	4.8	16300	31429.1	9.32	CAEEL	A0A061AIZ0	Uncharacterized protein
89	89.1	1	1	5.7	7.7	21500	20816.7	6.16	CAEEL	A0A0K3ARZ8	Protein containing ALS2cr12 (ALS2CR12) signature
90	90.1	1	1	5.69	5.9	712	16958.3	6.12	CAEEL	Q95XX0	Ubiquitin-conjugating enzyme E2 13
91	91.1	1	1	5.59	0.4	99500	164445	7.19	CAEEL	G5EDU3	Phospholipase
92	92.1	1	1	5.56	3	76600	74226.9	5.98	CAEEL	P34672	Bestrophin homolog 24
93	93.1	1	1	5.5	0.5	10900	117809	6.43	CAEEL	O76571	Uncharacterized protein
94	94.1	1	1	5.48	2.1	54100	80126.6	8.61	CAEEL	Q18563	Regulator of G-protein signaling rgs-6
95	95.1	1	1	5.44	0.9	112000	87766.2	9.17	CAEEL	B7FAS5	TBC (Tre-2/Bub2/Cdc16) domain family
95	95.1	1	1	5.44	0.6	112000	113086	9.14	CAEEL	Q7K711	TBC (Tre-2/Bub2/Cdc16) domain family
95	95.1	1	1	5.44	0.6	112000	119733	9.14	CAEEL	Q9U2D8	TBC (Tre-2/Bub2/Cdc16) domain family
96	96.1	1	1	5.29	1.8	2430	50319.4	6.33	CAEEL	O45870	Putative neutral sphingomyelinase
97	97.1	1	1	5.24	2.1	23600	102802	7.73	CAEEL	A0A078BS72	Uncharacterized protein
98	98.1	1	1	5.23	0.8	5540	118713	5.87	CAEEL	Q17657	Uncharacterized protein
99	99.1	3	1	5.22	4.5	189000	46776.7	7.82	CAEEL	H2L0B0	Nuclear Hormone Receptor family
99	99.1	3	1	5.22	4.9	189000	43296.9	8.76	CAEEL	Q86PJ5	Nuclear Hormone Receptor family
99	99.1	3	1	5.22	7.4	189000	28890.5	9.47	CAEEL	Q8MXE5	Nuclear Hormone Receptor family
99	99.1	3	1	5.22	5.5	189000	38365.1	6.21	CAEEL	S6FD08	Nuclear Hormone Receptor family
100	100.1	1	1	5.2	5.9	4360	27268.8	5.15	CAEEL	G5EEN8	t-SNARE protein aex-4
101	101.1	1	1	5.2	4.6	22000	30089.2	7.88	CAEEL	Q20091	COLlagen
102	102.1	1	1	5.17	2.6	15200	61727.4	5.62	CAEEL	G1K0V0	Uncharacterized protein
102	102.1	1	1	5.17	2.1	15200	73889.7	5.74	CAEEL	H2KZ08	Uncharacterized protein
103	103.1	3	1	5.16	8.2	22300	19593.1	9.56	CAEEL	Q19165	FMRFamide-like neuropeptides 6
104	104.1	2	1	5.15	0.4	8870	148181	5.99	CAEEL	Q95XJ2	Uncharacterized protein
104	104.1	2	1	5.15	0.4	8870	147358	6.05	CAEEL	U4PMU1	Uncharacterized protein
105	105.1	1	1	5.13	0.7	22900	201923	5.8	CAEEL	Q18983	Uncharacterized protein
106	106.1	1	1	5.12	0.2	17200	460350	5.95	CAEEL	G5EBH3	SMAll
106	106.1	1	1	5.12	0.2	17200	472260	6.01	CAEEL	G5EC35	Beta chain spectrin homolog Sma1
106	106.1	1	1	5.12	0.2	17200	484047	5.98	CAEEL	G5EFW3	SMAll
106	106.1	1	1	5.12	0.2	17200	462525	6.02	CAEEL	G5EG97	SMAll
107	107.1	1	1	5	2.9	15000	40441.2	7.88	CAEEL	Q9XXS2	SET (Trithorax/polycomb) domain containing
108	108.1	1	1	4.99	1.3	1930	140947	5.55	CAEEL	D7SFM3	Histone acetyltransferase
108	108.1	1	1	4.99	1	1930	179130	5.48	CAEEL	G5EBH5	Histone acetyltransferase
108	108.1	1	1	4.99	1.1	1930	174110	5.45	CAEEL	G5EGP0	Histone acetyltransferase
108	108.1	1	1	4.99	1.3	1930	141994	5.52	CAEEL	G5EGU3	Histone acetyltransferase
108	108.1	1	1	4.99	1	1930	179476	5.48	CAEEL	K8ERR8	Histone acetyltransferase
108	108.1	1	1	4.99	1.3	1930	142340	5.52	CAEEL	K8ES81	Histone acetyltransferase
108	108.1	1	1	4.99	1.3	1930	141294	5.55	CAEEL	K8ESF3	Histone acetyltransferase
108	108.1	1	1	4.99	1.1	1930	174457	5.45	CAEEL	K8F7U3	Histone acetyltransferase
108	108.1	1	1	4.99	3.3	1930	59130.3	5.65	CAEEL	L8E6K3	Histone acetyltransferase
108	108.1	1	1	4.99	2.9	1930	65844.1	6.84	CAEEL	Q21789	Histone acetyltransferase
109	109.1	1	1	4.99	7.3	1410	13500.4	10.4	CAEEL	P04255	Histone H2B 1
109	109.1	1	1	4.99	13.4	1410	7374.2	9.69	CAEEL	Q22979	HIStone
109	109.1	1	1	4.99	7.3	1410	13545.4	10.34	CAEEL	Q27484	Probable histone H2B 3
109	109.1	1	1	4.99	7.3	1410	13585.5	10.4	CAEEL	Q27876	Probable histone H2B 4
109	109.1	1	1	4.99	7.3	1410	13571.5	10.4	CAEEL	Q27894	Histone H2B 2
110	110.1	1	1	4.92	4	2560	24317.5	11.32	CAEEL	Q17561	Ref/ALY RNA export adaptor family
111	111.1	2	1	4.87	2.4	127000	94171.3	6.19	CAEEL	O17744	Uncharacterized protein
112	112.1	1	1	4.84	0.9	49000	105064	8.55	CAEEL	H2L080	Uncharacterized protein
112	112.1	1	1	4.84	1.6	49000	61639.4	9.03	CAEEL	Q8IG16	Uncharacterized protein
113	113.1	1	1	4.83	3.6	3770	29003.3	9.04	CAEEL	Q9N5U6	Uncharacterized protein
114	114.1	1	1	4.78	3.8	21500	40568.8	5.62	CAEEL	Q11123	Uncharacterized protein C03F11.2
115	115.1	1	1	4.66	7	3700	18673.9	5.06	CAEEL	P19625	Myosin regulatory light chain 1
115	115.1	1	1	4.66	7	3700	18659.9	5.06	CAEEL	P19626	Myosin regulatory light chain 2
116	116.1	1	1	4.66	4.8	8090	21768.3	10.25	CAEEL	Q965N5	Uncharacterized protein
117	117.1	1	1	4.65	1.6	6900	48788.4	8.39	CAEEL	O01755	AdaPtin, Mu/medium chain (Clathrin associated complex)
118	118.1	1	1	4.64	9.5	57300	23470.7	10.24	CAEEL	P49391	Probable 40S ribosomal protein S14, mitochondrial
119	119.1	1	1	4.58	2.6	1310	54919.2	7.81	CAEEL	G5ECM6	Elongation factor Tu homologue
119	119.1	1	1	4.58	2.6	1310	54788	7.92	CAEEL	Q7JQD2	Elongation factor Tu homologue (Fragment)
120	120.1	1	1	4.53	3.7	7630	27644.7	9.14	CAEEL	O02121	F-box B protein
121	121.1	1	1	4.48	2.6	9810	60864.8	9.02	CAEEL	Q9N4H0	Uncharacterized protein
122	122.1	1	1	4.42	1.6	78700	100673	5.4	CAEEL	O17944	Uncharacterized protein
122	122.1	1	1	4.42	2.1	78700	79140.3	5.19	CAEEL	Q564S2	Uncharacterized protein
123	123.1	1	1	4.35	2.7	58600	38618.7	9.65	CAEEL	P91475	Serpentine Receptor, class AB (Class A-like)
124	124.1	1	1	4.35	5.6	14400	11789	8.96	CAEEL	Q21377	Uncharacterized protein
125	125.1	1	1	4.34	3.7	6720	65135.7	5.98	CAEEL	Q21234	Uncharacterized protein
126	126.1	2	1	4.28	6.2	0	34485.1	9.69	CAEEL	A0A3P6MY32	Uncharacterized protein
127	127.1	1	1	4.25	1.6	34300	152982	9.52	CAEEL	O17582	Suppressor of presenilin protein 4
128	128.1	1	1	4.17	1.4	153000	62277	6.23	CAEEL	Q8IG67	Uncharacterized protein
129	129.1	1	1	4.14	3.4	2700	20298.5	9.12	CAEEL	Q22966	C-type LECtin
130	130.1	1	1	4.13	8.4	9250	13288.8	5.65	CAEEL	Q52GX5	Uncharacterized protein
131	131.1	1	1	4.11	0.5	18400	198195	5.14	CAEEL	Q19350	Drosophila CRumBs homolog
132	132.1	1	1	4.05	1.1	3840	58787.5	7	CAEEL	G5EDP9	Phosphoinositide 3-kinase adapter subunit
133	133.1	1	1	4.01	2.3	10900	101652	7.55	CAEEL	Q20733	Suppressor of activated egl-4 protein 1
134	134.1	1	1	3.96	2.1	19300	51559.4	8.28	CAEEL	B3WFV4	Leucyl Amino-acyl tRNA Synthetase
134	134.1	1	1	3.96	1.2	19300	94927.1	8.78	CAEEL	G5EBH2	Leucyl-tRNA synthetase (Mitochondrial)
134	134.1	1	1	3.96	1.1	19300	98618.4	9.01	CAEEL	Q23511	Leucyl Amino-acyl tRNA Synthetase
135	135.1	1	1	3.95	3.5	13000	42720.2	6.44	CAEEL	O62034	Nuclear Hormone Receptor family
135	135.1	1	1	3.95	3.5	13000	42990.4	6.6	CAEEL	Q9GTE4	Nuclear receptor NHR-63 (Fragment)
136	136.1	1	1	3.89	4.6	38000	33173.1	6.55	CAEEL	G5EBH4	CaDmium Responsive
136	136.1	1	1	3.89	4.6	38000	33073.9	6.55	CAEEL	Q21097	CaDmium Responsive
137	137.1	1	1	3.89	1.4	216000	62597.1	9.8	CAEEL	P91122	Uncharacterized protein
138	138.1	1	1	3.87	2.6	51000	54636.5	5.1	CAEEL	O18195	Daf-16-Dependent Longevity (WT but not daf-16 lifespan increased)
139	139.1	1	1	3.85	8.8	3290	19178.7	4.92	CAEEL	P91833	Uncharacterized protein
140	140.1	1	1	3.8	1.3	111000	50682.4	8.6	CAEEL	D6VPA0	MATH (Meprin-associated Traf homology) domain containing
141	141.1	1	1	3.7	2	4590	80786.5	9.7	CAEEL	H2L031	Uncharacterized protein
141	141.1	1	1	3.7	3	4590	56212	7.78	CAEEL	Q27420	Uncharacterized protein
142	142.1	1	1	3.68	4.7	2950	29277.8	9.15	CAEEL	Q9N4C7	Uncharacterized protein
143	143.1	1	1	3.67	7.4	5190	25026.5	9.75	CAEEL	Q4TTD0	Uncharacterized protein
144	144.1	1	1	3.66	0.6	1340	203241	8.93	CAEEL	H2KYA5	Uncharacterized protein
145	145.1	1	1	3.65	6.7	14400	23074.6	9.51	CAEEL	D2YW13	Uncharacterized protein
146	146.1	1	1	3.6	14.8	689	10245	10.3	CAEEL	A0A2C9C3B3	Uncharacterized protein
146	146.1	1	1	3.6	20.2	689	7701.1	10.17	CAEEL	A0A2C9C3E6	Uncharacterized protein
146	146.1	1	1	3.6	13.5	689	11304.3	10.46	CAEEL	A0A2C9C3L6	Uncharacterized protein
146	146.1	1	1	3.6	17.9	689	8760.3	10.34	CAEEL	A0A2C9C3L8	Uncharacterized protein
146	146.1	1	1	3.6	10.5	689	14912.3	10.18	CAEEL	Q21140	Uncharacterized protein
147	147.1	1	1	3.59	3.5	54100	41806.6	8.45	CAEEL	O62112	Nuclear Hormone Receptor family
148	148.1	1	1	3.58	4.3	63200	50918.3	6.26	CAEEL	G5ECB6	Glycosyltransferase
149	149.1	1	1	3.56	3.3	16800	52312.3	5.84	CAEEL	Q18924	SULfatase domain protein
150	150.1	1	1	3.44	27.2	4170	5493.6	11.64	CAEEL	E0AHA5	Uncharacterized protein
151	151.1	1	1	3.44	5	51000	28425.9	4.73	CAEEL	Q966F4	Uncharacterized protein
152	152.1	1	1	3.39	6	11700	26091.1	5.38	CAEEL	A0A168H4I0	Fidgetin-like protein 1
152	152.1	1	1	3.39	2.3	11700	66528.3	9.06	CAEEL	O16299	Fidgetin-like protein 1
153	153.1	1	1	3.35	1.3	7500	48315.8	5.31	CAEEL	G5EF21	Uncharacterized protein
153	153.1	1	1	3.35	1.6	7500	42200.1	9.58	CAEEL	O16955	Serpentine Receptor, class W
154	154.1	1	1	3.31	1.7	15100	113173	5.46	CAEEL	Q21776	Mitotic checkpoint serine/threonine-protein kinase bub-1
155	155.1	1	1	3.3	5	78700	32364.4	8.46	CAEEL	Q9XUF2	Uncharacterized protein
156	156.1	1	1	3.26	5.1	3370	30976.8	5.31	CAEEL	P91061	Uncharacterized protein
157	157.1	1	1	3.18	7.5	5540	17025.6	6.12	CAEEL	V6CLD0	COLlagen
157	157.1	1	1	3.18	5.5	5540	23560.8	8.65	CAEEL	V6CLE3	COLlagen
158	158.1	1	1	3.17	1.4	2720	88281.5	6.02	CAEEL	H2L0L1	Uncharacterized protein
158	158.1	1	1	3.17	1.3	2720	90428	6.02	CAEEL	Q9TZF5	Uncharacterized protein
159	159.1	1	1	3.15	3.8	8470	30599	5.68	CAEEL	Q9TZB8	Uncharacterized protein
160	160.1	1	1	3.13	1.4	3840	44898.6	5.55	CAEEL	Q18535	Uncharacterized protein
161	161.1	1	1	3.08	2.4	22300	48437.3	4.33	CAEEL	Q8WQC5	Uncharacterized protein
162	162.1	2	1	3.04	0.7	3990	84914.4	9.61	CAEEL	O01497	TYRosinase
163	163.1	1	1	3	1.1	31600	245538	5.84	CAEEL	Q9U2G0	Putative U5 small nuclear ribonucleoprotein 200 kDa helicase
164	164.1	1	1	2.98	2.6	3300	55374.1	6.87	CAEEL	A0A131MB05	CUTiclin-Like
164	164.1	1	1	2.98	2.2	3300	65046.1	7.83	CAEEL	A0A131MBI8	CUTiclin-Like
165	165.1	1	1	2.81	3	69400	33381	10.02	CAEEL	Q21809	Uncharacterized protein
166	166.1	1	1	2.74	1.6	85200	49832.6	6.63	CAEEL	G5EBS1	tRNA isopentenyl transferase
167	167.1	1	1	2.71	3.5	4800	45789.7	9.67	CAEEL	D0Z5N1	CREB Homolog
167	167.1	1	1	2.71	7.9	4800	20229.5	9.36	CAEEL	D0Z5N2	CREB Homolog
167	167.1	1	1	2.71	4.6	4800	34666.7	9.3	CAEEL	G5EBL5	CREB Homolog
167	167.1	1	1	2.71	4.9	4800	32773.5	9.32	CAEEL	G5ECG1	CREB Homolog
167	167.1	1	1	2.71	4.5	4800	35279.4	9.3	CAEEL	Q8I4D7	CREB Homolog
167	167.1	1	1	2.71	4.7	4800	33370	9.3	CAEEL	Q8I4D8	CREB Homolog
167	167.1	1	1	2.71	4.5	4800	34942	9.3	CAEEL	Q9U2I0	CREB Homolog
168	168.1	1	1	2.71	6.7	60900	13381.4	9.89	CAEEL	Q18786	Probable small nuclear ribonucleoprotein Sm D2
169	169.1	1	1	2.51	3.4	17200	32102.7	6.84	CAEEL	Q20742	Uncharacterized protein
170	170.1	1	1	2.32	1.3	4120	60263.7	6.65	CAEEL	O02317	Uncharacterized protein
171	171.1	1	1	1.89	8.3	48700	17905.7	4.89	CAEEL	Q22790	Uncharacterized protein
172	172.1	1	1	1.69	15.9	65300	10996.7	10.08	CAEEL	Q95QP9	Fatty Acid CoA Synthetase family
173	173.1	1	1	1.29	3.2	11700	45784.2	6.32	CAEEL	Q9XTV3	Non-structural maintenance of chromosomes element 4
174	174.1	1	1	0.85	0.6	7310	178085	5.42	CAEEL	H2KZG3	Uncharacterized protein
174	174.1	1	1	0.85	0.6	7310	178658	5.44	CAEEL	Q8MPV6	Uncharacterized protein
Totals:	397	295
Group	Subgroup	Spectra	Distinct	Distinct	% AA	Total	Protein MW	Protein	Species	Database	Protein Name
(#)	(#)	(#)	Peptides	Summed	Coverage	Protein	(Da)	pI		Accession #
			(#)	MS/MS Search		Spectral
				Score		Intensity
1	1.1	5	3	21.09	5	27700	42157.4	5.44	CAEEL	O45815
#	Filename	z	Score	Spectrum	Variable	Sequence	Sequence Map	MH+	MH+	MH+
				Intensity	Sites			Matched	Mass Shift	Error
								(Da)	(Da)	(ppm)
1	ECOLIOP5048HB.3653.3653.2	2	9.15	6130		(R)GILTLK(Y)	(R)G I|L/T/L/K(Y)	644.434	-0.001	-1.5
2	ECOLIOP5048HC.3641.3641.2	2	9.14	6070		(R)GILTLK(Y)	(R)G I|L|T/L/K(Y)	644.434	-0.0003	-0.5
3	ECOLIOP5048HA.3647.3647.2	2	8.93	4990		(R)GILTLK(Y)	(R)G/I|L/T/L/K(Y)	644.434	-0.0017	-2.7
4	ECOLIOP5048HA.2932.2932.2	2	7.14	7960		(R)LDLAGR(D)	(R)L/D|L/A/G/R(D)	644.373	-0.0021	-3.2
5	ECOLIOP5048HC.2832.2832.2	2	4.8	2580		(K)IIAPPER(K)	(K)I/I|A|P P E R(K)	795.472	-0.0072	-9.1
Group	Subgroup	Spectra	Distinct	Distinct	% AA	Total	Protein MW	Protein	Species	Database	Protein Name
(#)	(#)	(#)	Peptides	Summed	Coverage	Protein	(Da)	pI		Accession #
			(#)	MS/MS Search		Spectral
				Score		Intensity
2	2.1	4	1	14.2	1.2	1550000	53610.1	6.17	CAEEL	Q09400
#	Filename	z	Score	Spectrum	Variable	Sequence	Sequence Map	MH+	MH+	MH+
				Intensity	Sites			Matched	Mass Shift	Error
								(Da)	(Da)	(ppm)
1	ECOLIOP5048HC.2484.2541.2	2	14.2	369000		(K)SGLLNR(F)	(K)S/G|L|L N/R(F)	659.384	0	0
2	ECOLIOP5048HA.2501.2547.2	2	14.11	396000		(K)SGLLNR(F)	(K)S/G|L|L N/R(F)	659.384	-0.001	-1.6
3	ECOLIOP5048HB.2493.2583.2	2	12.17	385000		(K)SGLLNR(F)	(K)S/G|L|L N/R(F)	659.384	-0.0006	-0.9
4	ECOLIOP5048HA.2561.2592.2	2	9.21	396000		(K)SGLLNR(F)	(K)S/G|L|L N/R(F)	659.384	-0.0019	-2.9
Group	Subgroup	Spectra	Distinct	Distinct	% AA	Total	Protein MW	Protein	Species	Database	Protein Name
(#)	(#)	(#)	Peptides	Summed	Coverage	Protein	(Da)	pI		Accession #
			(#)	MS/MS Search		Spectral
				Score		Intensity
3	3.1	5	1	13.89	1	554000	63688.4	5.62	CAEEL	Q9N4P3
#	Filename	z	Score	Spectrum	Variable	Sequence	Sequence Map	MH+	MH+	MH+
				Intensity	Sites			Matched	Mass Shift	Error
								(Da)	(Da)	(ppm)
1	ECOLIOP5048HC.2582.2600.2	2	13.89	109000		(R)SGIDLR(N)	(R)S/G|I|D L/R(N)	660.367	-0.0019	-2.8
2	ECOLIOP5048HB.2593.2608.2	2	13.83	111000		(R)SGIDLR(N)	(R)S/G|I|D L/R(N)	660.367	-0.0021	-3.1
3	ECOLIOP5048HA.2594.2621.2	2	12.93	112000		(R)SGIDLR(N)	(R)S/G|I|D L/R(N)	660.367	-0.0021	-3.2
4	ECOLIOP5048HA.2596.2625.2	2	9.45	112000		(R)SGIDLR(N)	(R)S/G|I|D L/R(N)	660.367	-0.0021	-3.2
5	ECOLIOP5048HB.2634.2634.2	2	5.94	111000		(R)SGIDLR(N)	(R)S/G|I|D L/R(N)	660.367	-0.0021	-3.1
Group	Subgroup	Spectra	Distinct	Distinct	% AA	Total	Protein MW	Protein	Species	Database	Protein Name
(#)	(#)	(#)	Peptides	Summed	Coverage	Protein	(Da)	pI		Accession #
			(#)	MS/MS Search		Spectral
				Score		Intensity
4	4.1	3	1	13.26	5.4	507000	40860	5.86	CAEEL	Q17930
#	Filename	z	Score	Spectrum	Variable	Sequence	Sequence Map	MH+	MH+	MH+
				Intensity	Sites			Matched	Mass Shift	Error
								(Da)	(Da)	(ppm)
1	ECOLIOP5048HB.4414.4414.3	3	13.26	238000		(K)CSSLHDEMISKQCQPVLLK(L)	(K)C S S L H D E M\I|S K Q C Q P V/L/L/K(L)	2273.11	0.0441	19.4
2	ECOLIOP5048HA.4310.4397.3	3	13.14	242000		(K)CSSLHDEMISKQCQPVLLK(L)	(K)C S S L H D E M\I|S K/Q C Q P V/L/L/K(L)	2273.11	0.0444	19.5
3	ECOLIOP5048HA.4323.4323.4	4	11.83	28000		(K)CSSLHDEMISKQCQPVLLK(L)	(K)C S S L H D E M|I/S K Q C Q P V L L/K(L)	2273.11	0.0436	19.2
Group	Subgroup	Spectra	Distinct	Distinct	% AA	Total	Protein MW	Protein	Species	Database	Protein Name
(#)	(#)	(#)	Peptides	Summed	Coverage	Protein	(Da)	pI		Accession #
			(#)	MS/MS Search		Spectral
				Score		Intensity
5	5.1	3	1	12.46	3.2	442000	31791.1	9.38	CAEEL	G5EFI9
#	Filename	z	Score	Spectrum	Variable	Sequence	Sequence Map	MH+	MH+	MH+
				Intensity	Sites			Matched	Mass Shift	Error
								(Da)	(Da)	(ppm)
1	ECOLIOP5048HA.2363.2363.3	3	12.46	157000		(R)AKMNIISNR(M)	(R)A K M/N I|I/S/N/R(M)	1046.58	0.0152	14.5
2	ECOLIOP5048HB.2359.2359.3	3	11.01	127000		(R)AKMNIISNR(M)	(R)A K M/N I|I|S/N R(M)	1046.58	0.015	14.3
3	ECOLIOP5048HA.2387.2387.3	3	7.7	157000		(R)AKMNIISNR(M)	(R)A K M/N\I|I/S N/R(M)	1046.58	0.0152	14.5
Group	Subgroup	Spectra	Distinct	Distinct	% AA	Total	Protein MW	Protein	Species	Database	Protein Name
(#)	(#)	(#)	Peptides	Summed	Coverage	Protein	(Da)	pI		Accession #
			(#)	MS/MS Search		Spectral
				Score		Intensity
6	6.1	1	1	11.86	0.9	127000	107910	6.63	CAEEL	H2L2D1
#	Filename	z	Score	Spectrum	Variable	Sequence	Sequence Map	MH+	MH+	MH+
				Intensity	Sites			Matched	Mass Shift	Error
								(Da)	(Da)	(ppm)
1	ECOLIOP5048HB.2363.2392.3	3	11.86	127000		(R)EIIMATIQK(S)	(R)E/I/I M/A|T I Q K(S)	1046.59	0.0011	1
Group	Subgroup	Spectra	Distinct	Distinct	% AA	Total	Protein MW	Protein	Species	Database	Protein Name
(#)	(#)	(#)	Peptides	Summed	Coverage	Protein	(Da)	pI		Accession #
			(#)	MS/MS Search		Spectral
				Score		Intensity
7	7.1	1	1	11.76	0.6	42300	164186	5.9	CAEEL	P90757
#	Filename	z	Score	Spectrum	Variable	Sequence	Sequence Map	MH+	MH+	MH+
				Intensity	Sites			Matched	Mass Shift	Error
								(Da)	(Da)	(ppm)
1	ECOLIOP5048HB.2356.2364.2	2	11.76	42300		(K)LQSVLEVMK(N)	(K)L/Q|S|V/L E V M K(N)	1046.59	0.0008	0.7
Group	Subgroup	Spectra	Distinct	Distinct	% AA	Total	Protein MW	Protein	Species	Database	Protein Name
(#)	(#)	(#)	Peptides	Summed	Coverage	Protein	(Da)	pI		Accession #
			(#)	MS/MS Search		Spectral
				Score		Intensity
8	8.1	3	2	11.45	5.4	284000	54245.5	8.35	CAEEL	Q27512
#	Filename	z	Score	Spectrum	Variable	Sequence	Sequence Map	MH+	MH+	MH+
				Intensity	Sites			Matched	Mass Shift	Error
								(Da)	(Da)	(ppm)
1	ECOLIOP5048HC.5194.5194.2	2	5.82	57300		(K)ASNHSIEKAIEFEFSGDIR(D)	(K)A S N H\S/I E K A I E F E F S G D/I R(D)	2150.05	-0.0349	-16.3
2	ECOLIOP5048HA.2299.2299.2	2	5.63	113000		(R)AMEGLGTK(E)	(R)A M E G/L/G T K(E)	806.408	-0.0066	-8.2
3	ECOLIOP5048HA.2164.2164.2	2	5.62	113000		(R)AMEGLGTK(E)	(R)A/M E/G|L G T K(E)	806.408	-0.0066	-8.2
Group	Subgroup	Spectra	Distinct	Distinct	% AA	Total	Protein MW	Protein	Species	Database	Protein Name
(#)	(#)	(#)	Peptides	Summed	Coverage	Protein	(Da)	pI		Accession #
			(#)	MS/MS Search		Spectral
				Score		Intensity
9	9.1	2	1	11.19	0.9	315000	109608	4.37	CAEEL	Q09560
#	Filename	z	Score	Spectrum	Variable	Sequence	Sequence Map	MH+	MH+	MH+
				Intensity	Sites			Matched	Mass Shift	Error
								(Da)	(Da)	(ppm)
1	ECOLIOP5048HA.2367.2367.3	3	11.19	157000		(R)EELDAITKK(L)	(R)E E L D A|I/T K K(L)	1046.57	0.0199	19
2	ECOLIOP5048HA.2390.2390.3	3	10.63	157000		(R)EELDAITKK(L)	(R)E E L D A|I/T/K K(L)	1046.57	0.0199	19
Group	Subgroup	Spectra	Distinct	Distinct	% AA	Total	Protein MW	Protein	Species	Database	Protein Name
(#)	(#)	(#)	Peptides	Summed	Coverage	Protein	(Da)	pI		Accession #
			(#)	MS/MS Search		Spectral
				Score		Intensity
10	10.1	2	1	11.09	1.9	305000	46457.4	9.96	CAEEL	B3WFV2
#	Filename	z	Score	Spectrum	Variable	Sequence	Sequence Map	MH+	MH+	MH+
				Intensity	Sites			Matched	Mass Shift	Error
								(Da)	(Da)	(ppm)
1	ECOLIOP5048HC.2352.2352.3	3	11.09	153000		(R)KWRSSNIR(R)	(R)K W/R|S|S/N/I R(R)	1046.59	0.0095	9.1
2	ECOLIOP5048HC.2355.2355.3	3	9.1	153000		(R)KWRSSNIR(R)	(R)K\W/R|S|S N/I R(R)	1046.59	0.0095	9.1
Group	Subgroup	Spectra	Distinct	Distinct	% AA	Total	Protein MW	Protein	Species	Database	Protein Name
(#)	(#)	(#)	Peptides	Summed	Coverage	Protein	(Da)	pI		Accession #
			(#)	MS/MS Search		Spectral
				Score		Intensity
11	11.1	3	1	10.97	2.7	213000	74997.9	8.26	CAEEL	O62139
#	Filename	z	Score	Spectrum	Variable	Sequence	Sequence Map	MH+	MH+	MH+
				Intensity	Sites			Matched	Mass Shift	Error
								(Da)	(Da)	(ppm)
1	ECOLIOP5048HC.4025.4073.3	3	10.97	76600	M65m	(K)IPELADTQPFPFmDRLEK(I)	(K)I P/E L/A D T Q P F P|F m D R L E/K(I)	2147.08	15.9639	-14.3
2	ECOLIOP5048HA.4039.4087.3	3	10.09	72800	M65m	(K)IPELADTQPFPFmDRLEK(I)	(K)I P/E L/A D T Q P F P|F m D R L E/K(I)	2147.08	15.9648	-13.9
3	ECOLIOP5048HA.4037.4037.2	2	2.85	63900	M65m	(K)IPELADTQPFPFmDRLEK(I)	(K)I P E L/A D T\Q P F P|F m D R L E K(I)	2147.08	15.9657	-13.5
Group	Subgroup	Spectra	Distinct	Distinct	% AA	Total	Protein MW	Protein	Species	Database	Protein Name
(#)	(#)	(#)	Peptides	Summed	Coverage	Protein	(Da)	pI		Accession #
			(#)	MS/MS Search		Spectral
				Score		Intensity
12	12.1	1	1	10.65	3.3	38500	72907.1	9.5	CAEEL	Q9XXN2
#	Filename	z	Score	Spectrum	Variable	Sequence	Sequence Map	MH+	MH+	MH+
				Intensity	Sites			Matched	Mass Shift	Error
								(Da)	(Da)	(ppm)
1	ECOLIOP5048HB.4419.4419.4	4	10.65	38500		(K)LETIRAIEHHVQTIREAIEAGK(D)	(K)L/E T/I R A I E H H/V Q T I/R E A I/E A G K(D)	2514.38	-0.039	-15.5
Group	Subgroup	Spectra	Distinct	Distinct	% AA	Total	Protein MW	Protein	Species	Database	Protein Name
(#)	(#)	(#)	Peptides	Summed	Coverage	Protein	(Da)	pI		Accession #
			(#)	MS/MS Search		Spectral
				Score		Intensity
13	13.1	1	1	10.06	2.9	1130	31842.5	9.48	CAEEL	Q93438
#	Filename	z	Score	Spectrum	Variable	Sequence	Sequence Map	MH+	MH+	MH+
				Intensity	Sites			Matched	Mass Shift	Error
								(Da)	(Da)	(ppm)
1	ECOLIOP5048HA.9492.9492.3	3	10.06	1130		(K)KWNPLRER(K)	(K)K|W N/P|L R E R(K)	1098.62	0.0211	19.2
Group	Subgroup	Spectra	Distinct	Distinct	% AA	Total	Protein MW	Protein	Species	Database	Protein Name
(#)	(#)	(#)	Peptides	Summed	Coverage	Protein	(Da)	pI		Accession #
			(#)	MS/MS Search		Spectral
				Score		Intensity
14	14.1	1	1	10.02	2.9	1930	51197.2	6.06	CAEEL	Q9U2K7
#	Filename	z	Score	Spectrum	Variable	Sequence	Sequence Map	MH+	MH+	MH+
				Intensity	Sites			Matched	Mass Shift	Error
								(Da)	(Da)	(ppm)
1	ECOLIOP5048HC.2512.2512.2	2	10.02	1930		(R)SSIKDQAHSAALK(F)	(R)S S|I K D Q|A H S A A\L K(F)	1355.73	-0.0196	-14.4
Group	Subgroup	Spectra	Distinct	Distinct	% AA	Total	Protein MW	Protein	Species	Database	Protein Name
(#)	(#)	(#)	Peptides	Summed	Coverage	Protein	(Da)	pI		Accession #
			(#)	MS/MS Search		Spectral
				Score		Intensity
15	15.1	3	1	9.92	4.3	155000	61967	9.57	CAEEL	Q95Y89
#	Filename	z	Score	Spectrum	Variable	Sequence	Sequence Map	MH+	MH+	MH+
				Intensity	Sites			Matched	Mass Shift	Error
								(Da)	(Da)	(ppm)
1	ECOLIOP5048HC.4742.4786.3	3	9.92	53000	M429m	(R)SmGKDVSDLEAAIPKTMDELPMR(R)	(R)S m G K D\V S D\L/E A A I P K T M D E/L P\M R(R)	2534.23	15.9965	0.6
2	ECOLIOP5048HA.4735.4772.3	3	8.7	50600	M429m	(R)SmGKDVSDLEAAIPKTMDELPMR(R)	(R)S m G K D\V S D\L/E A A I P K T M D E/L P\M R(R)	2534.23	15.9938	-0.4
3	ECOLIOP5048HB.4748.4790.3	3	8.61	51600	M429m	(R)SmGKDVSDLEAAIPKTMDELPMR(R)	(R)S m G K D\V S D\L/E A A I P K T M D E/L P\M R(R)	2534.23	15.9904	-1.8
Group	Subgroup	Spectra	Distinct	Distinct	% AA	Total	Protein MW	Protein	Species	Database	Protein Name
(#)	(#)	(#)	Peptides	Summed	Coverage	Protein	(Da)	pI		Accession #
			(#)	MS/MS Search		Spectral
				Score		Intensity
16	16.1	1	1	9.75	5.5	406000	16299	5.52	CAEEL	P02513
#	Filename	z	Score	Spectrum	Variable	Sequence	Sequence Map	MH+	MH+	MH+
				Intensity	Sites			Matched	Mass Shift	Error
								(Da)	(Da)	(ppm)
1	ECOLIOP5048HB.2161.2201.2	2	9.75	406000		(K)SAISNEGK(L)	(K)S/A|I S N E G K(L)	805.405	0.0095	11.8
Group	Subgroup	Spectra	Distinct	Distinct	% AA	Total	Protein MW	Protein	Species	Database	Protein Name
(#)	(#)	(#)	Peptides	Summed	Coverage	Protein	(Da)	pI		Accession #
			(#)	MS/MS Search		Spectral
				Score		Intensity
17	17.1	1	1	9.38	1.4	42300	68040.6	8.71	CAEEL	Q21406
#	Filename	z	Score	Spectrum	Variable	Sequence	Sequence Map	MH+	MH+	MH+
				Intensity	Sites			Matched	Mass Shift	Error
								(Da)	(Da)	(ppm)
1	ECOLIOP5048HB.2360.2360.2	2	9.38	42300	M309m	(R)LKmSSIVPR(D)	(R)L/K|m/S S/I/V P/R(D)	1030.61	15.9845	-10
Group	Subgroup	Spectra	Distinct	Distinct	% AA	Total	Protein MW	Protein	Species	Database	Protein Name
(#)	(#)	(#)	Peptides	Summed	Coverage	Protein	(Da)	pI		Accession #
			(#)	MS/MS Search		Spectral
				Score		Intensity
18	18.1	1	1	9.35	2.1	7020	122816	6.79	CAEEL	E7EAU8
#	Filename	z	Score	Spectrum	Variable	Sequence	Sequence Map	MH+	MH+	MH+
				Intensity	Sites			Matched	Mass Shift	Error
								(Da)	(Da)	(ppm)
1	ECOLIOP5048HA.4834.4834.2	2	9.35	7020	M118m	(K)NASVYFGPGCNNEmLVIGRLAPR(W)	(K)N A S V\Y\F\G P\G C/N N E/m L V I G R L/A P R(W)	2535.26	15.9512	-17.1
Group	Subgroup	Spectra	Distinct	Distinct	% AA	Total	Protein MW	Protein	Species	Database	Protein Name
(#)	(#)	(#)	Peptides	Summed	Coverage	Protein	(Da)	pI		Accession #
			(#)	MS/MS Search		Spectral
				Score		Intensity
19	19.1	3	1	9.28	1.5	1060000	55695.2	11.42	CAEEL	Q09633
#	Filename	z	Score	Spectrum	Variable	Sequence	Sequence Map	MH+	MH+	MH+
				Intensity	Sites			Matched	Mass Shift	Error
								(Da)	(Da)	(ppm)
1	ECOLIOP5048HA.2169.2213.2	2	9.28	343000		(R)SASTARGR(S)	(R)S/A|S T/A R G/R(S)	805.428	-0.0136	-16.9
2	ECOLIOP5048HC.2158.2209.2	2	8.74	309000		(R)SASTARGR(S)	(R)S/A|S T/A R G|R(S)	805.428	-0.0112	-13.9
3	ECOLIOP5048HB.2233.2233.2	2	6.42	406000		(R)SASTARGR(S)	(R)S/A|S T A/R G/R(S)	805.428	-0.0127	-15.7
Group	Subgroup	Spectra	Distinct	Distinct	% AA	Total	Protein MW	Protein	Species	Database	Protein Name
(#)	(#)	(#)	Peptides	Summed	Coverage	Protein	(Da)	pI		Accession #
			(#)	MS/MS Search		Spectral
				Score		Intensity
20	20.1	1	1	9.12	4.8	82000	26738.2	8.71	CAEEL	P90779
#	Filename	z	Score	Spectrum	Variable	Sequence	Sequence Map	MH+	MH+	MH+
				Intensity	Sites			Matched	Mass Shift	Error
								(Da)	(Da)	(ppm)
1	ECOLIOP5048HB.3835.3835.3	3	9.12	82000		(K)LNNSHNGGFFQK(D)	(K)L/N/N S H N G G F F Q/K(D)	1362.65	0.0189	13.9
Group	Subgroup	Spectra	Distinct	Distinct	% AA	Total	Protein MW	Protein	Species	Database	Protein Name
(#)	(#)	(#)	Peptides	Summed	Coverage	Protein	(Da)	pI		Accession #
			(#)	MS/MS Search		Spectral
				Score		Intensity
21	21.1	1	1	9.03	3	12700	73829.8	10.03	CAEEL	G5ED64
#	Filename	z	Score	Spectrum	Variable	Sequence	Sequence Map	MH+	MH+	MH+
				Intensity	Sites			Matched	Mass Shift	Error
								(Da)	(Da)	(ppm)
1	ECOLIOP5048HC.3635.3635.4	4	9.03	12700		(R)GSRSAGQKGTGQADVEPKPVK(R)	(R)G S R S\A G/Q\K G T G/Q A D/V E P K P V K(R)	2097.11	-0.001	-0.5
Group	Subgroup	Spectra	Distinct	Distinct	% AA	Total	Protein MW	Protein	Species	Database	Protein Name
(#)	(#)	(#)	Peptides	Summed	Coverage	Protein	(Da)	pI		Accession #
			(#)	MS/MS Search		Spectral
				Score		Intensity
22	22.1	3	1	8.92	3.6	358000	26312.5	9.74	CAEEL	A0A0K3AWR5
#	Filename	z	Score	Spectrum	Variable	Sequence	Sequence Map	MH+	MH+	MH+
				Intensity	Sites			Matched	Mass Shift	Error
								(Da)	(Da)	(ppm)
1	ECOLIOP5048HA.2166.2166.2	2	8.92	113000		(K)SASMVPSK(R)	(K)S/A|S M\V P S K(R)	806.408	-0.0066	-8.2
2	ECOLIOP5048HA.2302.2302.2	2	8.64	109000		(K)SASMVPSK(R)	(K)S/A|S M/V P S K(R)	806.408	-0.0066	-8.2
3	ECOLIOP5048HB.2298.2298.2	2	6.32	136000		(K)SASMVPSK(R)	(K)S/A|S M V/P S K(R)	806.408	-0.0053	-6.6
Group	Subgroup	Spectra	Distinct	Distinct	% AA	Total	Protein MW	Protein	Species	Database	Protein Name
(#)	(#)	(#)	Peptides	Summed	Coverage	Protein	(Da)	pI		Accession #
			(#)	MS/MS Search		Spectral
				Score		Intensity
23	23.1	3	1	8.82	0.1	24500	461741	5.2	CAEEL	H2L075
#	Filename	z	Score	Spectrum	Variable	Sequence	Sequence Map	MH+	MH+	MH+
				Intensity	Sites			Matched	Mass Shift	Error
								(Da)	(Da)	(ppm)
1	ECOLIOP5048HB.3473.3473.2	2	8.82	8300		(R)VSWLK(D)	(R)V/S|W/L/K(D)	632.377	-0.0041	-6.5
2	ECOLIOP5048HB.3461.3461.2	2	8.46	8300		(R)VSWLK(D)	(R)V/S|W/L|K(D)	632.377	-0.0041	-6.5
3	ECOLIOP5048HA.3464.3464.2	2	8.13	7950		(R)VSWLK(D)	(R)V/S|W/L/K(D)	632.377	-0.0022	-3.6
Group	Subgroup	Spectra	Distinct	Distinct	% AA	Total	Protein MW	Protein	Species	Database	Protein Name
(#)	(#)	(#)	Peptides	Summed	Coverage	Protein	(Da)	pI		Accession #
			(#)	MS/MS Search		Spectral
				Score		Intensity
24	24.1	1	1	8.78	1.2	3840	56832.6	4.88	CAEEL	Q18377
#	Filename	z	Score	Spectrum	Variable	Sequence	Sequence Map	MH+	MH+	MH+
				Intensity	Sites			Matched	Mass Shift	Error
								(Da)	(Da)	(ppm)
1	ECOLIOP5048HB.2666.2666.2	2	8.78	3840		(K)INLEAK(A)	(K)I/N/L|E A K(A)	687.404	-0.0042	-6.1
Group	Subgroup	Spectra	Distinct	Distinct	% AA	Total	Protein MW	Protein	Species	Database	Protein Name
(#)	(#)	(#)	Peptides	Summed	Coverage	Protein	(Da)	pI		Accession #
			(#)	MS/MS Search		Spectral
				Score		Intensity
25	25.1	3	1	8.78	9.4	255000	11421.3	10.29	CAEEL	Q9U374
#	Filename	z	Score	Spectrum	Variable	Sequence	Sequence Map	MH+	MH+	MH+
				Intensity	Sites			Matched	Mass Shift	Error
								(Da)	(Da)	(ppm)
1	ECOLIOP5048HA.2364.2371.2	2	8.78	53900		(R)IKAGSTAKDR(H)	(R)I/K|A G S T/A\K D R(H)	1046.6	-0.0036	-3.4
2	ECOLIOP5048HC.2349.2356.2	2	8.28	48900		(R)IKAGSTAKDR(H)	(R)I/K|A G S T\A\K D/R(H)	1046.6	-0.0027	-2.6
3	ECOLIOP5048HC.2381.2381.3	3	7.32	153000		(R)IKAGSTAKDR(H)	(R)I/K/A|G S T|A\K D R(H)	1046.6	-0.0004	-0.3
Group	Subgroup	Spectra	Distinct	Distinct	% AA	Total	Protein MW	Protein	Species	Database	Protein Name
(#)	(#)	(#)	Peptides	Summed	Coverage	Protein	(Da)	pI		Accession #
			(#)	MS/MS Search		Spectral
				Score		Intensity
26	26.1	1	1	8.57	2.8	9110	68832.6	5.78	CAEEL	Q19266
#	Filename	z	Score	Spectrum	Variable	Sequence	Sequence Map	MH+	MH+	MH+
				Intensity	Sites			Matched	Mass Shift	Error
								(Da)	(Da)	(ppm)
1	ECOLIOP5048HC.4229.4229.3	3	8.57	9110	M516m	(K)LDINEGLRDmKEHQFFR(G)	(K)L D\I N/E G L/R D m\K E H Q F F R(G)	2148.07	15.9684	-12.2
Group	Subgroup	Spectra	Distinct	Distinct	% AA	Total	Protein MW	Protein	Species	Database	Protein Name
(#)	(#)	(#)	Peptides	Summed	Coverage	Protein	(Da)	pI		Accession #
			(#)	MS/MS Search		Spectral
				Score		Intensity
27	27.1	1	1	8.56	0.4	3590	262699	7.01	CAEEL	A0A1D3PCL8
#	Filename	z	Score	Spectrum	Variable	Sequence	Sequence Map	MH+	MH+	MH+
				Intensity	Sites			Matched	Mass Shift	Error
								(Da)	(Da)	(ppm)
1	ECOLIOP5048HC.9366.9366.3	3	8.56	3590		(R)ERLVLACVVK(N)	(R)E/R L V\L/A C V V/K(N)	1186.7	-0.0004	-0.3
Group	Subgroup	Spectra	Distinct	Distinct	% AA	Total	Protein MW	Protein	Species	Database	Protein Name
(#)	(#)	(#)	Peptides	Summed	Coverage	Protein	(Da)	pI		Accession #
			(#)	MS/MS Search		Spectral
				Score		Intensity
28	28.1	1	1	8.55	2.9	7940	22641.4	9.43	CAEEL	Q19022
#	Filename	z	Score	Spectrum	Variable	Sequence	Sequence Map	MH+	MH+	MH+
				Intensity	Sites			Matched	Mass Shift	Error
								(Da)	(Da)	(ppm)
1	ECOLIOP5048HC.3449.3449.2	2	8.55	7940		(K)VSKNGK(D)	(K)V/S|K/N G/K(D)	632.373	0.0024	3.8
Group	Subgroup	Spectra	Distinct	Distinct	% AA	Total	Protein MW	Protein	Species	Database	Protein Name
(#)	(#)	(#)	Peptides	Summed	Coverage	Protein	(Da)	pI		Accession #
			(#)	MS/MS Search		Spectral
				Score		Intensity
29	29.1	1	1	8.54	5.6	16700	42601.6	6.06	CAEEL	O45518
#	Filename	z	Score	Spectrum	Variable	Sequence	Sequence Map	MH+	MH+	MH+
				Intensity	Sites			Matched	Mass Shift	Error
								(Da)	(Da)	(ppm)
1	ECOLIOP5048HB.4360.4360.4	4	8.54	16700	M28m	(K)IEEAYVmLNGPDGAKCSSLLK(K)	(K)I E E A Y V m L N/G P\D G A K C S S/L L/K(K)	2295.14	15.968	-11.7
Group	Subgroup	Spectra	Distinct	Distinct	% AA	Total	Protein MW	Protein	Species	Database	Protein Name
(#)	(#)	(#)	Peptides	Summed	Coverage	Protein	(Da)	pI		Accession #
			(#)	MS/MS Search		Spectral
				Score		Intensity
30	30.1	1	1	8.41	2.8	79500	29126.7	6.24	CAEEL	Q19812
#	Filename	z	Score	Spectrum	Variable	Sequence	Sequence Map	MH+	MH+	MH+
				Intensity	Sites			Matched	Mass Shift	Error
								(Da)	(Da)	(ppm)
1	ECOLIOP5048HC.1972.2033.2	2	8.41	79500		(K)IEKPEYK(K)	(K)I E|K P E Y/K(K)	906.493	0.0087	9.6
Group	Subgroup	Spectra	Distinct	Distinct	% AA	Total	Protein MW	Protein	Species	Database	Protein Name
(#)	(#)	(#)	Peptides	Summed	Coverage	Protein	(Da)	pI		Accession #
			(#)	MS/MS Search		Spectral
				Score		Intensity
31	31.1	1	1	8.4	5.1	14300	52854	6.12	CAEEL	Q18453
#	Filename	z	Score	Spectrum	Variable	Sequence	Sequence Map	MH+	MH+	MH+
				Intensity	Sites			Matched	Mass Shift	Error
								(Da)	(Da)	(ppm)
1	ECOLIOP5048HB.4777.4777.3	3	8.4	14300	M458m	(K)IGNSFAGLDQFmSLSLGSTNSNAPK(A)	(K)I G|N\S F A/G L D Q F m S L S L G S T N/S N A P K(A)	2556.24	15.9695	-9.9
Group	Subgroup	Spectra	Distinct	Distinct	% AA	Total	Protein MW	Protein	Species	Database	Protein Name
(#)	(#)	(#)	Peptides	Summed	Coverage	Protein	(Da)	pI		Accession #
			(#)	MS/MS Search		Spectral
				Score		Intensity
32	32.1	1	1	8.33	3.9	244000	32727.4	9.31	CAEEL	G5ECX9
#	Filename	z	Score	Spectrum	Variable	Sequence	Sequence Map	MH+	MH+	MH+
				Intensity	Sites			Matched	Mass Shift	Error
								(Da)	(Da)	(ppm)
1	ECOLIOP5048HB.3401.3470.2	2	8.33	244000		(R)STGSIGDFELK(E)	(R)S/T G S|I G D F E/L/K(E)	1153.57	-0.0033	-2.8
Group	Subgroup	Spectra	Distinct	Distinct	% AA	Total	Protein MW	Protein	Species	Database	Protein Name
(#)	(#)	(#)	Peptides	Summed	Coverage	Protein	(Da)	pI		Accession #
			(#)	MS/MS Search		Spectral
				Score		Intensity
33	33.1	1	1	8.3	6.3	6090	23805.9	10.02	CAEEL	Q22415
#	Filename	z	Score	Spectrum	Variable	Sequence	Sequence Map	MH+	MH+	MH+
				Intensity	Sites			Matched	Mass Shift	Error
								(Da)	(Da)	(ppm)
1	ECOLIOP5048HA.3933.3933.3	3	8.3	6090		(K)CNEVKEAVMFPAK(R)	(K)C/N\E V/K E A V M F P A/K(R)	1522.74	-0.0264	-17.3
Group	Subgroup	Spectra	Distinct	Distinct	% AA	Total	Protein MW	Protein	Species	Database	Protein Name
(#)	(#)	(#)	Peptides	Summed	Coverage	Protein	(Da)	pI		Accession #
			(#)	MS/MS Search		Spectral
				Score		Intensity
34	34.1	1	1	8.13	3.5	2680	37723.7	5.26	CAEEL	G3MU65
#	Filename	z	Score	Spectrum	Variable	Sequence	Sequence Map	MH+	MH+	MH+
				Intensity	Sites			Matched	Mass Shift	Error
								(Da)	(Da)	(ppm)
1	ECOLIOP5048HC.4210.4210.2	2	8.13	2680		(K)TGSTSDVPGLLK(R)	(K)T/G S T S D V P|G/L/L K(R)	1174.63	0.0179	15.2
Group	Subgroup	Spectra	Distinct	Distinct	% AA	Total	Protein MW	Protein	Species	Database	Protein Name
(#)	(#)	(#)	Peptides	Summed	Coverage	Protein	(Da)	pI		Accession #
			(#)	MS/MS Search		Spectral
				Score		Intensity
35	35.1	1	1	8.09	1.9	63000	114011	9.2	CAEEL	Q9U3H5
#	Filename	z	Score	Spectrum	Variable	Sequence	Sequence Map	MH+	MH+	MH+
				Intensity	Sites			Matched	Mass Shift	Error
								(Da)	(Da)	(ppm)
1	ECOLIOP5048HC.4128.4128.2	2	8.09	63000	M720m	(K)ANIRSVPRSNLTSETQSmR(G)	(K)A N I R/S V/P R S N L T/S E T Q/S m R(G)	2147.1	15.9539	-19
Group	Subgroup	Spectra	Distinct	Distinct	% AA	Total	Protein MW	Protein	Species	Database	Protein Name
(#)	(#)	(#)	Peptides	Summed	Coverage	Protein	(Da)	pI		Accession #
			(#)	MS/MS Search		Spectral
				Score		Intensity
36	36.1	1	1	7.98	4.8	8910	40988.3	8.62	CAEEL	O17609
#	Filename	z	Score	Spectrum	Variable	Sequence	Sequence Map	MH+	MH+	MH+
				Intensity	Sites			Matched	Mass Shift	Error
								(Da)	(Da)	(ppm)
1	ECOLIOP5048HB.4097.4097.4	4	7.98	8910	M53m M58m	(K)mVDEYmKVYGNQRFNFK(R)	(K)m V/D E Y m K/V/Y/G N\Q/R F N F K(R)	2169.03	31.9732	-7.6
Group	Subgroup	Spectra	Distinct	Distinct	% AA	Total	Protein MW	Protein	Species	Database	Protein Name
(#)	(#)	(#)	Peptides	Summed	Coverage	Protein	(Da)	pI		Accession #
			(#)	MS/MS Search		Spectral
				Score		Intensity
37	37.1	1	1	7.96	11.5	8220	17221.4	10.08	CAEEL	Q9BKQ9
#	Filename	z	Score	Spectrum	Variable	Sequence	Sequence Map	MH+	MH+	MH+
				Intensity	Sites			Matched	Mass Shift	Error
								(Da)	(Da)	(ppm)
1	ECOLIOP5048HC.3488.3488.4	4	7.96	8220		(R)TCQKLQAAAPIQSSIRGK(A)	(R)T C Q K L Q/A A A P/I Q S S/I R G K(A)	1957.07	-0.0071	-3.6
Group	Subgroup	Spectra	Distinct	Distinct	% AA	Total	Protein MW	Protein	Species	Database	Protein Name
(#)	(#)	(#)	Peptides	Summed	Coverage	Protein	(Da)	pI		Accession #
			(#)	MS/MS Search		Spectral
				Score		Intensity
38	38.1	1	1	7.92	4.1	1210	40814	9.22	CAEEL	B3GWD2
#	Filename	z	Score	Spectrum	Variable	Sequence	Sequence Map	MH+	MH+	MH+
				Intensity	Sites			Matched	Mass Shift	Error
								(Da)	(Da)	(ppm)
1	ECOLIOP5048HA.5307.5307.3	3	7.92	1210		(K)KGTGSPSVYSTQLGC(-)	(K)K G/T G|S P/S V|Y S T Q L G C(-)	1541.73	-0.0172	-11.2
Group	Subgroup	Spectra	Distinct	Distinct	% AA	Total	Protein MW	Protein	Species	Database	Protein Name
(#)	(#)	(#)	Peptides	Summed	Coverage	Protein	(Da)	pI		Accession #
			(#)	MS/MS Search		Spectral
				Score		Intensity
39	39.1	1	1	7.82	1	36300	206849	5.42	CAEEL	Q22516
#	Filename	z	Score	Spectrum	Variable	Sequence	Sequence Map	MH+	MH+	MH+
				Intensity	Sites			Matched	Mass Shift	Error
								(Da)	(Da)	(ppm)
1	ECOLIOP5048HA.3623.3623.4	4	7.82	36300		(K)TVQSLTFLYTLMKEGHTK(G)	(K)T V Q\S L\T F\L\Y\T L M K/E G\H T K(G)	2097.11	0.0022	1
Group	Subgroup	Spectra	Distinct	Distinct	% AA	Total	Protein MW	Protein	Species	Database	Protein Name
(#)	(#)	(#)	Peptides	Summed	Coverage	Protein	(Da)	pI		Accession #
			(#)	MS/MS Search		Spectral
				Score		Intensity
40	40.1	1	1	7.76	1.8	91700	31638.6	11.14	CAEEL	P18832
#	Filename	z	Score	Spectrum	Variable	Sequence	Sequence Map	MH+	MH+	MH+
				Intensity	Sites			Matched	Mass Shift	Error
								(Da)	(Da)	(ppm)
1	ECOLIOP5048HB.2637.2637.2	2	7.76	91700		(K)SGQRGR(G)	(K)S/G|Q\R G/R(G)	660.354	0.0118	17.9
Group	Subgroup	Spectra	Distinct	Distinct	% AA	Total	Protein MW	Protein	Species	Database	Protein Name
(#)	(#)	(#)	Peptides	Summed	Coverage	Protein	(Da)	pI		Accession #
			(#)	MS/MS Search		Spectral
				Score		Intensity
41	41.1	2	1	7.62	12.7	475000	16559.7	9.57	CAEEL	Q4W4Z8
#	Filename	z	Score	Spectrum	Variable	Sequence	Sequence Map	MH+	MH+	MH+
				Intensity	Sites			Matched	Mass Shift	Error
								(Da)	(Da)	(ppm)
1	ECOLIOP5048HB.4320.4388.3	3	7.62	238000	M98m	(R)QKSKPAEmNPTREYISHLK(D)	(R)Q/K S\K P A E/m N P T R E Y I S H/L/K(D)	2257.18	15.9786	-7.2
2	ECOLIOP5048HC.4416.4416.3	3	5.15	237000	M98m	(R)QKSKPAEmNPTREYISHLK(D)	(R)Q/K S K P|A E m N P T R E Y I S H/L/K(D)	2257.18	15.9786	-7.2
Group	Subgroup	Spectra	Distinct	Distinct	% AA	Total	Protein MW	Protein	Species	Database	Protein Name
(#)	(#)	(#)	Peptides	Summed	Coverage	Protein	(Da)	pI		Accession #
			(#)	MS/MS Search		Spectral
				Score		Intensity
42	42.1	1	1	7.6	6.9	38600	18651.3	9.52	CAEEL	P34361
#	Filename	z	Score	Spectrum	Variable	Sequence	Sequence Map	MH+	MH+	MH+
				Intensity	Sites			Matched	Mass Shift	Error
								(Da)	(Da)	(ppm)
1	ECOLIOP5048HC.4770.4770.3	3	7.6	38600		(R)LILPRFTIRSN(-)	(R)L I L P/R F T/I/R S/N(-)	1329.8	0.026	19.5
Group	Subgroup	Spectra	Distinct	Distinct	% AA	Total	Protein MW	Protein	Species	Database	Protein Name
(#)	(#)	(#)	Peptides	Summed	Coverage	Protein	(Da)	pI		Accession #
			(#)	MS/MS Search		Spectral
				Score		Intensity
43	43.1	1	1	7.6	1.9	906	63364.7	9.01	CAEEL	P34424
#	Filename	z	Score	Spectrum	Variable	Sequence	Sequence Map	MH+	MH+	MH+
				Intensity	Sites			Matched	Mass Shift	Error
								(Da)	(Da)	(ppm)
1	ECOLIOP5048HC.2515.2515.2	2	7.6	906		(R)MKEAAQQKIHR(N)	(R)M/K E|A A Q|Q K I H R(N)	1339.73	-0.0084	-6.2
Group	Subgroup	Spectra	Distinct	Distinct	% AA	Total	Protein MW	Protein	Species	Database	Protein Name
(#)	(#)	(#)	Peptides	Summed	Coverage	Protein	(Da)	pI		Accession #
			(#)	MS/MS Search		Spectral
				Score		Intensity
44	44.1	1	1	7.49	1.5	53000	171677	5.95	CAEEL	G5ED98
#	Filename	z	Score	Spectrum	Variable	Sequence	Sequence Map	MH+	MH+	MH+
				Intensity	Sites			Matched	Mass Shift	Error
								(Da)	(Da)	(ppm)
1	ECOLIOP5048HC.4819.4819.3	3	7.49	53000		(R)KELSDDVSRIATLALTACEDTNK(Q)	(R)K E L S\D D V S R I A T L A L T/A C E/D T N K(Q)	2550.27	-0.0406	-15.9
Group	Subgroup	Spectra	Distinct	Distinct	% AA	Total	Protein MW	Protein	Species	Database	Protein Name
(#)	(#)	(#)	Peptides	Summed	Coverage	Protein	(Da)	pI		Accession #
			(#)	MS/MS Search		Spectral
				Score		Intensity
45	45.1	1	1	7.49	3.3	8710	71504.2	8.61	CAEEL	Q17492
#	Filename	z	Score	Spectrum	Variable	Sequence	Sequence Map	MH+	MH+	MH+
				Intensity	Sites			Matched	Mass Shift	Error
								(Da)	(Da)	(ppm)
1	ECOLIOP5048HA.4757.4757.3	3	7.49	8710		(R)KLELECCQTLNKQGFIGMCSR(L)	(R)K L E|L E C C Q T L N K Q G F I G/M C S R(L)	2572.21	-0.0093	-3.6
Group	Subgroup	Spectra	Distinct	Distinct	% AA	Total	Protein MW	Protein	Species	Database	Protein Name
(#)	(#)	(#)	Peptides	Summed	Coverage	Protein	(Da)	pI		Accession #
			(#)	MS/MS Search		Spectral
				Score		Intensity
46	46.1	1	1	7.42	2.2	60500	60171.4	9.56	CAEEL	Q20720
#	Filename	z	Score	Spectrum	Variable	Sequence	Sequence Map	MH+	MH+	MH+
				Intensity	Sites			Matched	Mass Shift	Error
								(Da)	(Da)	(ppm)
1	ECOLIOP5048HC.4735.4735.3	3	7.42	60500		(K)TPTRAAKTPVVK(T)	(K)T P\T/R A A K\T/P V V K(T)	1268.77	0.002	1.5
Group	Subgroup	Spectra	Distinct	Distinct	% AA	Total	Protein MW	Protein	Species	Database	Protein Name
(#)	(#)	(#)	Peptides	Summed	Coverage	Protein	(Da)	pI		Accession #
			(#)	MS/MS Search		Spectral
				Score		Intensity
47	47.1	1	1	7.37	1.8	56600	49383.2	5.14	CAEEL	D1YSH6
#	Filename	z	Score	Spectrum	Variable	Sequence	Sequence Map	MH+	MH+	MH+
				Intensity	Sites			Matched	Mass Shift	Error
								(Da)	(Da)	(ppm)
1	ECOLIOP5048HB.2295.2295.2	2	7.37	56600		(K)IASAKEQK(I)	(K)I/A S A/K/E Q K(I)	874.499	-0.0024	-2.7
Group	Subgroup	Spectra	Distinct	Distinct	% AA	Total	Protein MW	Protein	Species	Database	Protein Name
(#)	(#)	(#)	Peptides	Summed	Coverage	Protein	(Da)	pI		Accession #
			(#)	MS/MS Search		Spectral
				Score		Intensity
48	48.1	2	1	7.35	1.8	95300	74303.1	9.33	CAEEL	Q9TYV5
#	Filename	z	Score	Spectrum	Variable	Sequence	Sequence Map	MH+	MH+	MH+
				Intensity	Sites			Matched	Mass Shift	Error
								(Da)	(Da)	(ppm)
1	ECOLIOP5048HA.4380.4380.2	2	7.35	48700	M254m	(R)GmNVDPAADWTK(V)	(R)G/m N/V\D\P A A/D/W T/K(V)	1304.59	15.9794	-11.7
2	ECOLIOP5048HB.4332.4348.2	2	3.65	46600	M254m	(R)GmNVDPAADWTK(V)	(R)G/m N V\D|P A A D W T/K(V)	1304.59	15.9795	-11.7
Group	Subgroup	Spectra	Distinct	Distinct	% AA	Total	Protein MW	Protein	Species	Database	Protein Name
(#)	(#)	(#)	Peptides	Summed	Coverage	Protein	(Da)	pI		Accession #
			(#)	MS/MS Search		Spectral
				Score		Intensity
49	49.1	1	1	7.34	5.1	33400	50156.3	5.86	CAEEL	P34475
#	Filename	z	Score	Spectrum	Variable	Sequence	Sequence Map	MH+	MH+	MH+
				Intensity	Sites			Matched	Mass Shift	Error
								(Da)	(Da)	(ppm)
1	ECOLIOP5048HA.4402.4402.4	4	7.34	33400	M303m	(K)TSVADVTRFLLKPTSMmVSTASR(V)	(K)T\S V A D V T/R F L L K P T\S|M/m V S T A S R(V)	2498.31	16.0182	9.3
Group	Subgroup	Spectra	Distinct	Distinct	% AA	Total	Protein MW	Protein	Species	Database	Protein Name
(#)	(#)	(#)	Peptides	Summed	Coverage	Protein	(Da)	pI		Accession #
			(#)	MS/MS Search		Spectral
				Score		Intensity
50	50.1	1	1	7.3	1.3	4110	59173.1	7.93	CAEEL	G5EDC7
#	Filename	z	Score	Spectrum	Variable	Sequence	Sequence Map	MH+	MH+	MH+
				Intensity	Sites			Matched	Mass Shift	Error
								(Da)	(Da)	(ppm)
1	ECOLIOP5048HC.2498.2519.2	2	7.3	4110		(K)ARLDCLK(S)	(K)A/R L\D/C L K(S)	875.477	0.0084	9.6
Group	Subgroup	Spectra	Distinct	Distinct	% AA	Total	Protein MW	Protein	Species	Database	Protein Name
(#)	(#)	(#)	Peptides	Summed	Coverage	Protein	(Da)	pI		Accession #
			(#)	MS/MS Search		Spectral
				Score		Intensity
51	51.1	2	1	7.3	4.6	148000	46529.3	8.77	CAEEL	Q19683
#	Filename	z	Score	Spectrum	Variable	Sequence	Sequence Map	MH+	MH+	MH+
				Intensity	Sites			Matched	Mass Shift	Error
								(Da)	(Da)	(ppm)
1	ECOLIOP5048HB.4047.4084.3	3	7.3	71500		(R)FFAANVGVKFQTPEEFFGK(S)	(R)F F A A N V/G V K F Q|T P/E E F\F G/K(S)	2163.09	-0.0399	-18.4
2	ECOLIOP5048HC.4099.4099.3	3	5.2	76600		(R)FFAANVGVKFQTPEEFFGK(S)	(R)F F A A N V/G V K F|Q|T P/E E F F G/K(S)	2163.09	-0.0416	-19.2
Group	Subgroup	Spectra	Distinct	Distinct	% AA	Total	Protein MW	Protein	Species	Database	Protein Name
(#)	(#)	(#)	Peptides	Summed	Coverage	Protein	(Da)	pI		Accession #
			(#)	MS/MS Search		Spectral
				Score		Intensity
52	52.1	2	1	7.27	3.9	69400	61557.2	7.79	CAEEL	O17828
#	Filename	z	Score	Spectrum	Variable	Sequence	Sequence Map	MH+	MH+	MH+
				Intensity	Sites			Matched	Mass Shift	Error
								(Da)	(Da)	(ppm)
1	ECOLIOP5048HA.4739.4773.2	2	7.27	34200	M412m M420m	(R)LQATREHYTVmKNHTETEmAK(N)	(R)L Q A T R/E H\Y T V m K N/H T E T/E m A K(N)	2518.22	32.0079	7.1
2	ECOLIOP5048HC.4750.4764.2	2	7.14	35300	M412m M420m	(R)LQATREHYTVmKNHTETEmAK(N)	(R)L Q A T R/E H\Y T V m K N/H T/E T/E m A K(N)	2518.22	32.0106	8.2
Group	Subgroup	Spectra	Distinct	Distinct	% AA	Total	Protein MW	Protein	Species	Database	Protein Name
(#)	(#)	(#)	Peptides	Summed	Coverage	Protein	(Da)	pI		Accession #
			(#)	MS/MS Search		Spectral
				Score		Intensity
53	53.1	4	1	7.23	1.6	536000	55502.8	6.31	CAEEL	Q09989
#	Filename	z	Score	Spectrum	Variable	Sequence	Sequence Map	MH+	MH+	MH+
				Intensity	Sites			Matched	Mass Shift	Error
								(Da)	(Da)	(ppm)
1	ECOLIOP5048HB.2302.2302.2	2	7.23	136000		(R)SADSEAVK(R)	(R)S A|D S E|A V K(R)	806.389	0.0133	16.5
2	ECOLIOP5048HB.2156.2156.2	2	6.26	143000		(R)SADSEAVK(R)	(R)S/A|D S\E|A V K(R)	806.389	0.0133	16.5
3	ECOLIOP5048HB.2153.2153.2	2	5.12	143000		(R)SADSEAVK(R)	(R)S A|D S E|A V K(R)	806.389	0.0133	16.5
4	ECOLIOP5048HA.2162.2162.2	2	3.69	113000		(R)SADSEAVK(R)	(R)S/A|D S E|A V K(R)	806.389	0.012	14.9
Group	Subgroup	Spectra	Distinct	Distinct	% AA	Total	Protein MW	Protein	Species	Database	Protein Name
(#)	(#)	(#)	Peptides	Summed	Coverage	Protein	(Da)	pI		Accession #
			(#)	MS/MS Search		Spectral
				Score		Intensity
54	54.1	1	1	7.05	2	369000	32029.6	9.61	CAEEL	O62347
#	Filename	z	Score	Spectrum	Variable	Sequence	Sequence Map	MH+	MH+	MH+
				Intensity	Sites			Matched	Mass Shift	Error
								(Da)	(Da)	(ppm)
1	ECOLIOP5048HC.2550.2576.2	2	7.05	369000		(K)LKEGGR(Q)	(K)L/K|E/G G/R(Q)	659.384	-0.0022	-3.3
Group	Subgroup	Spectra	Distinct	Distinct	% AA	Total	Protein MW	Protein	Species	Database	Protein Name
(#)	(#)	(#)	Peptides	Summed	Coverage	Protein	(Da)	pI		Accession #
			(#)	MS/MS Search		Spectral
				Score		Intensity
55	55.1	4	1	7.04	15.3	63900	13532.4	6.64	CAEEL	Q09506
#	Filename	z	Score	Spectrum	Variable	Sequence	Sequence Map	MH+	MH+	MH+
				Intensity	Sites			Matched	Mass Shift	Error
								(Da)	(Da)	(ppm)
1	ECOLIOP5048HA.4045.4045.2	2	7.04	63900	M94m	(K)ILQVNGADFTMmTHDRAVK(F)	(K)I L Q V/N G\A D F T M m/T H D R A V/K(F)	2147.07	15.9758	-8.8
2	ECOLIOP5048HA.4060.4060.2	2	5.55	63900	M94m	(K)ILQVNGADFTMmTHDRAVK(F)	(K)I L Q V/N G\A D F T M m/T H D R A V/K(F)	2147.07	15.9758	-8.8
Group	Subgroup	Spectra	Distinct	Distinct	% AA	Total	Protein MW	Protein	Species	Database	Protein Name
(#)	(#)	(#)	Peptides	Summed	Coverage	Protein	(Da)	pI		Accession #
			(#)	MS/MS Search		Spectral
				Score		Intensity
56	56.1	1	1	6.98	1.1	10300	95039.4	9.07	CAEEL	Q23141
#	Filename	z	Score	Spectrum	Variable	Sequence	Sequence Map	MH+	MH+	MH+
				Intensity	Sites			Matched	Mass Shift	Error
								(Da)	(Da)	(ppm)
1	ECOLIOP5048HC.3408.3408.3	3	6.98	10300		(K)DFKNYDDFK(I)	(K)D F/K/N Y/D/D F\K(I)	1191.53	-0.014	-11.7
Group	Subgroup	Spectra	Distinct	Distinct	% AA	Total	Protein MW	Protein	Species	Database	Protein Name
(#)	(#)	(#)	Peptides	Summed	Coverage	Protein	(Da)	pI		Accession #
			(#)	MS/MS Search		Spectral
				Score		Intensity
57	57.1	1	1	6.92	3.6	6800	76870	9.76	CAEEL	B5BM46
#	Filename	z	Score	Spectrum	Variable	Sequence	Sequence Map	MH+	MH+	MH+
				Intensity	Sites			Matched	Mass Shift	Error
								(Da)	(Da)	(ppm)
1	ECOLIOP5048HC.4768.4768.3	3	6.92	6800	M584m	(R)VSMSmSPTSPSSDPPSTSSYSVLPK(S)	(R)V S M S m S P T\S P S S D/P P/S\T/S S/Y S\V L P K(S)	2556.18	16.0413	18
Group	Subgroup	Spectra	Distinct	Distinct	% AA	Total	Protein MW	Protein	Species	Database	Protein Name
(#)	(#)	(#)	Peptides	Summed	Coverage	Protein	(Da)	pI		Accession #
			(#)	MS/MS Search		Spectral
				Score		Intensity
58	58.1	1	1	6.87	1.4	1300	110225	6.39	CAEEL	Q18298
#	Filename	z	Score	Spectrum	Variable	Sequence	Sequence Map	MH+	MH+	MH+
				Intensity	Sites			Matched	Mass Shift	Error
								(Da)	(Da)	(ppm)
1	ECOLIOP5048HC.3417.3417.3	3	6.87	1300	M212m	(K)mDYYENNCVHPTAR(C)	(K)m D Y Y|E N N\C V\H P T A R(C)	1769.74	15.9782	-9.4
Group	Subgroup	Spectra	Distinct	Distinct	% AA	Total	Protein MW	Protein	Species	Database	Protein Name
(#)	(#)	(#)	Peptides	Summed	Coverage	Protein	(Da)	pI		Accession #
			(#)	MS/MS Search		Spectral
				Score		Intensity
59	59.1	1	1	6.8	3.1	6260	58156.4	6.8	CAEEL	P41990
#	Filename	z	Score	Spectrum	Variable	Sequence	Sequence Map	MH+	MH+	MH+
				Intensity	Sites			Matched	Mass Shift	Error
								(Da)	(Da)	(ppm)
1	ECOLIOP5048HC.3393.3393.3	3	6.8	6260		(K)NGGACISMDDTNIQCK(C)	(K)N/G/G/A C I S M D/D T N I Q C K(C)	1783.74	-0.0181	-10.2
Group	Subgroup	Spectra	Distinct	Distinct	% AA	Total	Protein MW	Protein	Species	Database	Protein Name
(#)	(#)	(#)	Peptides	Summed	Coverage	Protein	(Da)	pI		Accession #
			(#)	MS/MS Search		Spectral
				Score		Intensity
60	60.1	2	1	6.74	2.4	28900	101156	9.35	CAEEL	G5EC69
#	Filename	z	Score	Spectrum	Variable	Sequence	Sequence Map	MH+	MH+	MH+
				Intensity	Sites			Matched	Mass Shift	Error
								(Da)	(Da)	(ppm)
1	ECOLIOP5048HB.4136.4136.3	3	6.74	963	M180m	(K)MIIQEEKAmQAVPTSPVDASK(F)	(K)M I I Q/E E K A m/Q A V P T S P|V/D A S K(F)	2273.15	16.0026	3.3
2	ECOLIOP5048HA.4383.4383.4	4	4.42	28000		(K)MIIQEEKAMQAVPTSPVDASK(F)	(K)M I I Q E\E K A M Q A V P T S/P V/D A S/K(F)	2273.15	0.0007	0.3
Group	Subgroup	Spectra	Distinct	Distinct	% AA	Total	Protein MW	Protein	Species	Database	Protein Name
(#)	(#)	(#)	Peptides	Summed	Coverage	Protein	(Da)	pI		Accession #
			(#)	MS/MS Search		Spectral
				Score		Intensity
61	61.1	2	1	6.73	0.2	169000	287294	6.36	CAEEL	A0A061AJK8
#	Filename	z	Score	Spectrum	Variable	Sequence	Sequence Map	MH+	MH+	MH+
				Intensity	Sites			Matched	Mass Shift	Error
								(Da)	(Da)	(ppm)
1	ECOLIOP5048HB.10301.10301.2	2	6.73	88000		(K)VGNIWGK(S)	(K)V/G N/I/W\G K(S)	773.43	0.0025	3.2
2	ECOLIOP5048HB.10367.10367.2	2	3.92	80700		(K)VGNIWGK(S)	(K)V G N/I/W G K(S)	773.43	0.0027	3.5
Group	Subgroup	Spectra	Distinct	Distinct	% AA	Total	Protein MW	Protein	Species	Database	Protein Name
(#)	(#)	(#)	Peptides	Summed	Coverage	Protein	(Da)	pI		Accession #
			(#)	MS/MS Search		Spectral
				Score		Intensity
62	62.1	1	1	6.68	1.6	11300	95989.7	5.29	CAEEL	A0A163UTE6
#	Filename	z	Score	Spectrum	Variable	Sequence	Sequence Map	MH+	MH+	MH+
				Intensity	Sites			Matched	Mass Shift	Error
								(Da)	(Da)	(ppm)
1	ECOLIOP5048HA.3910.3910.2	2	6.68	11300	M104m	(R)SARNALDAEmAAMR(E)	(R)S A/R N A L D/A E/m/A A M R(E)	1506.71	15.9947	-0.1
Group	Subgroup	Spectra	Distinct	Distinct	% AA	Total	Protein MW	Protein	Species	Database	Protein Name
(#)	(#)	(#)	Peptides	Summed	Coverage	Protein	(Da)	pI		Accession #
			(#)	MS/MS Search		Spectral
				Score		Intensity
63	63.1	1	1	6.66	2.8	5070	27025.1	9.81	CAEEL	G3MU69
#	Filename	z	Score	Spectrum	Variable	Sequence	Sequence Map	MH+	MH+	MH+
				Intensity	Sites			Matched	Mass Shift	Error
								(Da)	(Da)	(ppm)
1	ECOLIOP5048HC.2648.2648.2	2	6.66	5070		(R)LAADIGK(A)	(R)L/A|A\D|I/G K(A)	687.404	-0.004	-5.9
Group	Subgroup	Spectra	Distinct	Distinct	% AA	Total	Protein MW	Protein	Species	Database	Protein Name
(#)	(#)	(#)	Peptides	Summed	Coverage	Protein	(Da)	pI		Accession #
			(#)	MS/MS Search		Spectral
				Score		Intensity
64	64.1	1	1	6.59	2.5	153000	40667.8	7.83	CAEEL	O62116
#	Filename	z	Score	Spectrum	Variable	Sequence	Sequence Map	MH+	MH+	MH+
				Intensity	Sites			Matched	Mass Shift	Error
								(Da)	(Da)	(ppm)
1	ECOLIOP5048HC.2348.2348.3	3	6.59	153000	M75m	(K)AGmKLELIR(K)	(K)A G\m/K/L E L/I R(K)	1030.61	15.9872	-7.4
Group	Subgroup	Spectra	Distinct	Distinct	% AA	Total	Protein MW	Protein	Species	Database	Protein Name
(#)	(#)	(#)	Peptides	Summed	Coverage	Protein	(Da)	pI		Accession #
			(#)	MS/MS Search		Spectral
				Score		Intensity
65	65.1	1	1	6.59	1.9	7060	37267.8	9.47	CAEEL	Q9N5I2
#	Filename	z	Score	Spectrum	Variable	Sequence	Sequence Map	MH+	MH+	MH+
				Intensity	Sites			Matched	Mass Shift	Error
								(Da)	(Da)	(ppm)
1	ECOLIOP5048HB.2932.2932.2	2	6.59	7060		(K)SITPIN(-)	(K)S/I\T P/I/N(-)	644.361	0.0097	15.1
Group	Subgroup	Spectra	Distinct	Distinct	% AA	Total	Protein MW	Protein	Species	Database	Protein Name
(#)	(#)	(#)	Peptides	Summed	Coverage	Protein	(Da)	pI		Accession #
			(#)	MS/MS Search		Spectral
				Score		Intensity
66	66.1	1	1	6.54	2.3	1010	56788.2	9.65	CAEEL	Q10048
#	Filename	z	Score	Spectrum	Variable	Sequence	Sequence Map	MH+	MH+	MH+
				Intensity	Sites			Matched	Mass Shift	Error
								(Da)	(Da)	(ppm)
1	ECOLIOP5048HB.5614.5614.3	3	6.54	1010		(-)MDSQKECVFVSEK(S)	(-)M D S Q K E/C V|F V S E K(S)	1586.72	-0.0087	-5.5
Group	Subgroup	Spectra	Distinct	Distinct	% AA	Total	Protein MW	Protein	Species	Database	Protein Name
(#)	(#)	(#)	Peptides	Summed	Coverage	Protein	(Da)	pI		Accession #
			(#)	MS/MS Search		Spectral
				Score		Intensity
67	67.1	1	1	6.46	7.1	22900	20449.7	5.27	CAEEL	Q18567
#	Filename	z	Score	Spectrum	Variable	Sequence	Sequence Map	MH+	MH+	MH+
				Intensity	Sites			Matched	Mass Shift	Error
								(Da)	(Da)	(ppm)
1	ECOLIOP5048HB.3952.3952.3	3	6.46	22900		(R)VLEWCNNHRDDGK(Y)	(R)V L/E W C N|N H R D D G/K(Y)	1642.74	-0.0012	-0.8
Group	Subgroup	Spectra	Distinct	Distinct	% AA	Total	Protein MW	Protein	Species	Database	Protein Name
(#)	(#)	(#)	Peptides	Summed	Coverage	Protein	(Da)	pI		Accession #
			(#)	MS/MS Search		Spectral
				Score		Intensity
68	68.1	2	1	6.4	2.1	196000	37959.1	9.98	CAEEL	F5GU62
#	Filename	z	Score	Spectrum	Variable	Sequence	Sequence Map	MH+	MH+	MH+
				Intensity	Sites			Matched	Mass Shift	Error
								(Da)	(Da)	(ppm)
1	ECOLIOP5048HB.2159.2159.2	2	6.4	143000		(R)SAKEESR(L)	(R)S A|K E E/S R(L)	806.4	0.0021	2.6
2	ECOLIOP5048HC.2309.2309.2	2	4.53	52500		(R)SAKEESR(L)	(R)S A|K E E/S R(L)	806.4	-0.0009	-1.1
Group	Subgroup	Spectra	Distinct	Distinct	% AA	Total	Protein MW	Protein	Species	Database	Protein Name
(#)	(#)	(#)	Peptides	Summed	Coverage	Protein	(Da)	pI		Accession #
			(#)	MS/MS Search		Spectral
				Score		Intensity
69	69.1	1	1	6.39	4	71700	31152.8	9.58	CAEEL	Q18611
#	Filename	z	Score	Spectrum	Variable	Sequence	Sequence Map	MH+	MH+	MH+
				Intensity	Sites			Matched	Mass Shift	Error
								(Da)	(Da)	(ppm)
1	ECOLIOP5048HA.3884.3884.3	3	6.39	71700		(K)ETDGVHWHLIR(C)	(K)E\T D G V H/W H L/I R(C)	1362.69	-0.0176	-12.9
Group	Subgroup	Spectra	Distinct	Distinct	% AA	Total	Protein MW	Protein	Species	Database	Protein Name
(#)	(#)	(#)	Peptides	Summed	Coverage	Protein	(Da)	pI		Accession #
			(#)	MS/MS Search		Spectral
				Score		Intensity
70	70.1	1	1	6.29	1.6	16300	41540.5	7	CAEEL	Q19958
#	Filename	z	Score	Spectrum	Variable	Sequence	Sequence Map	MH+	MH+	MH+
				Intensity	Sites			Matched	Mass Shift	Error
								(Da)	(Da)	(ppm)
1	ECOLIOP5048HB.2394.2394.2	2	6.29	16300		(R)RASSTR(I)	(R)R A/S/S T R(I)	677.369	-0.0084	-12.4
Group	Subgroup	Spectra	Distinct	Distinct	% AA	Total	Protein MW	Protein	Species	Database	Protein Name
(#)	(#)	(#)	Peptides	Summed	Coverage	Protein	(Da)	pI		Accession #
			(#)	MS/MS Search		Spectral
				Score		Intensity
71	71.1	1	1	6.29	8.9	8870	29968.3	5.46	CAEEL	Q9N352
#	Filename	z	Score	Spectrum	Variable	Sequence	Sequence Map	MH+	MH+	MH+
				Intensity	Sites			Matched	Mass Shift	Error
								(Da)	(Da)	(ppm)
1	ECOLIOP5048HB.4779.4779.3	3	6.29	8870		(K)SPEMSQTPPKDENNELEFGIPTK(R)	(K)S P E M S Q T P/P K D E\N N E L E F/G I/P T K(R)	2588.22	-0.0491	-19
Group	Subgroup	Spectra	Distinct	Distinct	% AA	Total	Protein MW	Protein	Species	Database	Protein Name
(#)	(#)	(#)	Peptides	Summed	Coverage	Protein	(Da)	pI		Accession #
			(#)	MS/MS Search		Spectral
				Score		Intensity
72	72.1	1	1	6.27	2	4240	71888.4	5.87	CAEEL	P38433
#	Filename	z	Score	Spectrum	Variable	Sequence	Sequence Map	MH+	MH+	MH+
				Intensity	Sites			Matched	Mass Shift	Error
								(Da)	(Da)	(ppm)
1	ECOLIOP5048HC.3920.3920.3	3	6.27	4240		(K)NEDGSFTQDVWPK(Y)	(K)N E D G/S F T Q/D V W P/K(Y)	1522.68	0.0239	15.7
Group	Subgroup	Spectra	Distinct	Distinct	% AA	Total	Protein MW	Protein	Species	Database	Protein Name
(#)	(#)	(#)	Peptides	Summed	Coverage	Protein	(Da)	pI		Accession #
			(#)	MS/MS Search		Spectral
				Score		Intensity
73	73.1	1	1	6.17	0.7	79400	114475	6.15	CAEEL	G5EFX2
#	Filename	z	Score	Spectrum	Variable	Sequence	Sequence Map	MH+	MH+	MH+
				Intensity	Sites			Matched	Mass Shift	Error
								(Da)	(Da)	(ppm)
1	ECOLIOP5048HB.2047.2047.2	2	6.17	79400		(R)FIGATELR(K)	(R)F I/G A T/E L R(K)	906.504	-0.0018	-2
Group	Subgroup	Spectra	Distinct	Distinct	% AA	Total	Protein MW	Protein	Species	Database	Protein Name
(#)	(#)	(#)	Peptides	Summed	Coverage	Protein	(Da)	pI		Accession #
			(#)	MS/MS Search		Spectral
				Score		Intensity
74	74.1	1	1	6.17	7.5	110000	11357	10.22	CAEEL	Q9BLC2
#	Filename	z	Score	Spectrum	Variable	Sequence	Sequence Map	MH+	MH+	MH+
				Intensity	Sites			Matched	Mass Shift	Error
								(Da)	(Da)	(ppm)
1	ECOLIOP5048HC.2152.2152.2	2	6.17	110000		(R)TQSDLDK(C)	(R)T\Q|S|D L/D K(C)	806.389	0.0104	12.9
Group	Subgroup	Spectra	Distinct	Distinct	% AA	Total	Protein MW	Protein	Species	Database	Protein Name
(#)	(#)	(#)	Peptides	Summed	Coverage	Protein	(Da)	pI		Accession #
			(#)	MS/MS Search		Spectral
				Score		Intensity
75	75.1	1	1	6.16	0.8	5070	77784.7	6.02	CAEEL	A0A2C9C2E8
#	Filename	z	Score	Spectrum	Variable	Sequence	Sequence Map	MH+	MH+	MH+
				Intensity	Sites			Matched	Mass Shift	Error
								(Da)	(Da)	(ppm)
1	ECOLIOP5048HC.2645.2645.2	2	6.16	5070		(K)LAENLK(L)	(K)L/A|E N/L K(L)	687.404	-0.004	-5.9
Group	Subgroup	Spectra	Distinct	Distinct	% AA	Total	Protein MW	Protein	Species	Database	Protein Name
(#)	(#)	(#)	Peptides	Summed	Coverage	Protein	(Da)	pI		Accession #
			(#)	MS/MS Search		Spectral
				Score		Intensity
76	76.1	1	1	6.13	0.9	22900	182483	6.12	CAEEL	A0A061AKU0
#	Filename	z	Score	Spectrum	Variable	Sequence	Sequence Map	MH+	MH+	MH+
				Intensity	Sites			Matched	Mass Shift	Error
								(Da)	(Da)	(ppm)
1	ECOLIOP5048HB.3927.3927.3	3	6.13	22900		(K)RMCSPGLFGAGCAMK(C)	(K)R M C/S P G L|F G A/G C A M/K(C)	1642.73	0.0058	3.5
Group	Subgroup	Spectra	Distinct	Distinct	% AA	Total	Protein MW	Protein	Species	Database	Protein Name
(#)	(#)	(#)	Peptides	Summed	Coverage	Protein	(Da)	pI		Accession #
			(#)	MS/MS Search		Spectral
				Score		Intensity
77	77.1	1	1	6.08	1.5	6130	46506.9	9.74	CAEEL	O16663
#	Filename	z	Score	Spectrum	Variable	Sequence	Sequence Map	MH+	MH+	MH+
				Intensity	Sites			Matched	Mass Shift	Error
								(Da)	(Da)	(ppm)
1	ECOLIOP5048HB.3661.3661.2	2	6.08	6130		(K)LTLGLK(V)	(K)L/T|L\G L/K(V)	644.434	-0.001	-1.5
Group	Subgroup	Spectra	Distinct	Distinct	% AA	Total	Protein MW	Protein	Species	Database	Protein Name
(#)	(#)	(#)	Peptides	Summed	Coverage	Protein	(Da)	pI		Accession #
			(#)	MS/MS Search		Spectral
				Score		Intensity
78	78.1	1	1	6.08	2.3	5730	39028.5	9.33	CAEEL	O44544
#	Filename	z	Score	Spectrum	Variable	Sequence	Sequence Map	MH+	MH+	MH+
				Intensity	Sites			Matched	Mass Shift	Error
								(Da)	(Da)	(ppm)
1	ECOLIOP5048HA.3385.3385.2	2	6.08	5730		(K)HTSSHISV(-)	(K)H T|S/S/H I S V(-)	867.432	-0.0146	-16.9
Group	Subgroup	Spectra	Distinct	Distinct	% AA	Total	Protein MW	Protein	Species	Database	Protein Name
(#)	(#)	(#)	Peptides	Summed	Coverage	Protein	(Da)	pI		Accession #
			(#)	MS/MS Search		Spectral
				Score		Intensity
79	79.1	1	1	6.03	0.5	29000	135624	9.77	CAEEL	H2KYL8
#	Filename	z	Score	Spectrum	Variable	Sequence	Sequence Map	MH+	MH+	MH+
				Intensity	Sites			Matched	Mass Shift	Error
								(Da)	(Da)	(ppm)
1	ECOLIOP5048HA.2019.2019.2	2	6.03	29000		(R)RSVFDKR(N)	(R)R S|V/F/D K R(N)	907.511	-0.0058	-6.4
Group	Subgroup	Spectra	Distinct	Distinct	% AA	Total	Protein MW	Protein	Species	Database	Protein Name
(#)	(#)	(#)	Peptides	Summed	Coverage	Protein	(Da)	pI		Accession #
			(#)	MS/MS Search		Spectral
				Score		Intensity
80	80.1	1	1	6.01	2.5	4090	47543.9	9.37	CAEEL	G8JY74
#	Filename	z	Score	Spectrum	Variable	Sequence	Sequence Map	MH+	MH+	MH+
				Intensity	Sites			Matched	Mass Shift	Error
								(Da)	(Da)	(ppm)
1	ECOLIOP5048HB.3431.3431.2	2	6.01	4090		(K)IGGIGTVPVGR(V)	(K)I G/G\I|G/T/V/P V G R(V)	1025.61	-0.0036	-3.5
Group	Subgroup	Spectra	Distinct	Distinct	% AA	Total	Protein MW	Protein	Species	Database	Protein Name
(#)	(#)	(#)	Peptides	Summed	Coverage	Protein	(Da)	pI		Accession #
			(#)	MS/MS Search		Spectral
				Score		Intensity
81	81.1	2	1	6	6.1	184000	25878.7	4.71	CAEEL	Q21069
#	Filename	z	Score	Spectrum	Variable	Sequence	Sequence Map	MH+	MH+	MH+
				Intensity	Sites			Matched	Mass Shift	Error
								(Da)	(Da)	(ppm)
1	ECOLIOP5048HB.5265.5265.3	3	6	91900	M40m	(K)ELENmETSDITVHK(Y)	(K)E L\E N\m/E/T/S D I T V H K(Y)	1645.77	15.9617	-20
2	ECOLIOP5048HB.5302.5302.3	3	4.76	91900	M40m	(K)ELENmETSDITVHK(Y)	(K)E L E N\m E T/S D I/T/V H/K(Y)	1645.77	15.9617	-20
Group	Subgroup	Spectra	Distinct	Distinct	% AA	Total	Protein MW	Protein	Species	Database	Protein Name
(#)	(#)	(#)	Peptides	Summed	Coverage	Protein	(Da)	pI		Accession #
			(#)	MS/MS Search		Spectral
				Score		Intensity
82	82.1	1	1	5.98	2	6280	108764	5.4	CAEEL	Q19753
#	Filename	z	Score	Spectrum	Variable	Sequence	Sequence Map	MH+	MH+	MH+
				Intensity	Sites			Matched	Mass Shift	Error
								(Da)	(Da)	(ppm)
1	ECOLIOP5048HB.4195.4195.3	3	5.98	6280	M688m	(R)EINYGGEALNDFTLmAFLDR(F)	(R)E/I/N Y G G E|A L N D F T L/m\A F L D R(F)	2289.09	15.9712	-10.3
Group	Subgroup	Spectra	Distinct	Distinct	% AA	Total	Protein MW	Protein	Species	Database	Protein Name
(#)	(#)	(#)	Peptides	Summed	Coverage	Protein	(Da)	pI		Accession #
			(#)	MS/MS Search		Spectral
				Score		Intensity
83	83.1	3	1	5.91	1.7	175000	51746.1	6.51	CAEEL	Q9TZE1
#	Filename	z	Score	Spectrum	Variable	Sequence	Sequence Map	MH+	MH+	MH+
				Intensity	Sites			Matched	Mass Shift	Error
								(Da)	(Da)	(ppm)
1	ECOLIOP5048HC.2291.2291.2	2	5.91	52800		(R)IREGKSGK(K)	(R)I/R E G K|S G K(K)	874.51	-0.0116	-13.3
2	ECOLIOP5048HA.2305.2305.2	2	5.07	60900		(R)IREGKSGK(K)	(R)I/R E G K|S\G K(K)	874.51	-0.0138	-15.8
3	ECOLIOP5048HA.2297.2297.2	2	4.89	60900		(R)IREGKSGK(K)	(R)I R\E G K/S G K(K)	874.51	-0.0138	-15.8
Group	Subgroup	Spectra	Distinct	Distinct	% AA	Total	Protein MW	Protein	Species	Database	Protein Name
(#)	(#)	(#)	Peptides	Summed	Coverage	Protein	(Da)	pI		Accession #
			(#)	MS/MS Search		Spectral
				Score		Intensity
84	84.1	1	1	5.88	3.5	804	37173.8	6.22	CAEEL	O45329
#	Filename	z	Score	Spectrum	Variable	Sequence	Sequence Map	MH+	MH+	MH+
				Intensity	Sites			Matched	Mass Shift	Error
								(Da)	(Da)	(ppm)
1	ECOLIOP5048HA.3899.3899.3	3	5.88	804		(K)ILKSEQCIKVK(E)	(K)I/L|K S E Q C/I K V K(E)	1345.79	0.0073	5.4
Group	Subgroup	Spectra	Distinct	Distinct	% AA	Total	Protein MW	Protein	Species	Database	Protein Name
(#)	(#)	(#)	Peptides	Summed	Coverage	Protein	(Da)	pI		Accession #
			(#)	MS/MS Search		Spectral
				Score		Intensity
85	85.1	1	1	5.82	9.7	78700	15216.1	9.15	CAEEL	I2HA82
#	Filename	z	Score	Spectrum	Variable	Sequence	Sequence Map	MH+	MH+	MH+
				Intensity	Sites			Matched	Mass Shift	Error
								(Da)	(Da)	(ppm)
1	ECOLIOP5048HC.5246.5246.3	3	5.82	78700		(-)MASVDYCASEMKNR(N)	(-)M\A S/V D Y C/A S E/M K\N R(N)	1661.71	0.0252	15.2
Group	Subgroup	Spectra	Distinct	Distinct	% AA	Total	Protein MW	Protein	Species	Database	Protein Name
(#)	(#)	(#)	Peptides	Summed	Coverage	Protein	(Da)	pI		Accession #
			(#)	MS/MS Search		Spectral
				Score		Intensity
86	86.1	1	1	5.81	1	3800	68439.8	5.49	CAEEL	Q95QN6
#	Filename	z	Score	Spectrum	Variable	Sequence	Sequence Map	MH+	MH+	MH+
				Intensity	Sites			Matched	Mass Shift	Error
								(Da)	(Da)	(ppm)
1	ECOLIOP5048HA.2658.2658.2	2	5.81	3800		(K)LANELK(D)	(K)L|A|N E L/K(D)	687.404	-0.0048	-7
Group	Subgroup	Spectra	Distinct	Distinct	% AA	Total	Protein MW	Protein	Species	Database	Protein Name
(#)	(#)	(#)	Peptides	Summed	Coverage	Protein	(Da)	pI		Accession #
			(#)	MS/MS Search		Spectral
				Score		Intensity
87	87.1	2	1	5.79	1.1	11300	136062	9.56	CAEEL	Q23260
#	Filename	z	Score	Spectrum	Variable	Sequence	Sequence Map	MH+	MH+	MH+
				Intensity	Sites			Matched	Mass Shift	Error
								(Da)	(Da)	(ppm)
1	ECOLIOP5048HB.3398.3398.3	3	5.79	3370		(R)SHPSVSTRDSSEER(K)	(R)S H P/S V S T R D S\S/E E R(K)	1573.72	-0.017	-10.8
2	ECOLIOP5048HA.3394.3394.3	3	1.7	7950		(R)SHPSVSTRDSSEER(K)	(R)S H P/S V S T R D S S E E R(K)	1573.72	-0.018	-11.4
Group	Subgroup	Spectra	Distinct	Distinct	% AA	Total	Protein MW	Protein	Species	Database	Protein Name
(#)	(#)	(#)	Peptides	Summed	Coverage	Protein	(Da)	pI		Accession #
			(#)	MS/MS Search		Spectral
				Score		Intensity
88	88.1	1	1	5.78	4.8	16300	31429.1	9.32	CAEEL	A0A061AIZ0
#	Filename	z	Score	Spectrum	Variable	Sequence	Sequence Map	MH+	MH+	MH+
				Intensity	Sites			Matched	Mass Shift	Error
								(Da)	(Da)	(ppm)
1	ECOLIOP5048HC.8124.8124.3	3	5.78	16300		(K)IKAAKGPVVPKPPK(N)	(K)I K A A K/G P V V P\K P P/K(N)	1429.92	0.0098	6.8
Group	Subgroup	Spectra	Distinct	Distinct	% AA	Total	Protein MW	Protein	Species	Database	Protein Name
(#)	(#)	(#)	Peptides	Summed	Coverage	Protein	(Da)	pI		Accession #
			(#)	MS/MS Search		Spectral
				Score		Intensity
89	89.1	1	1	5.7	7.7	21500	20816.7	6.16	CAEEL	A0A0K3ARZ8
#	Filename	z	Score	Spectrum	Variable	Sequence	Sequence Map	MH+	MH+	MH+
				Intensity	Sites			Matched	Mass Shift	Error
								(Da)	(Da)	(ppm)
1	ECOLIOP5048HA.3911.3911.3	3	5.7	21500		(K)DLEKMDSYLESANK(M)	(K)D L E K M D S/Y L E/S A N/K(M)	1642.76	-0.0314	-19.1
Group	Subgroup	Spectra	Distinct	Distinct	% AA	Total	Protein MW	Protein	Species	Database	Protein Name
(#)	(#)	(#)	Peptides	Summed	Coverage	Protein	(Da)	pI		Accession #
			(#)	MS/MS Search		Spectral
				Score		Intensity
90	90.1	1	1	5.69	5.9	712	16958.3	6.12	CAEEL	Q95XX0
#	Filename	z	Score	Spectrum	Variable	Sequence	Sequence Map	MH+	MH+	MH+
				Intensity	Sites			Matched	Mass Shift	Error
								(Da)	(Da)	(ppm)
1	ECOLIOP5048HA.2901.2901.3	3	5.69	712		(K)QWTMNYAQA(-)	(K)Q W T/M N/Y A Q A(-)	1112.48	-0.005	-4.5
Group	Subgroup	Spectra	Distinct	Distinct	% AA	Total	Protein MW	Protein	Species	Database	Protein Name
(#)	(#)	(#)	Peptides	Summed	Coverage	Protein	(Da)	pI		Accession #
			(#)	MS/MS Search		Spectral
				Score		Intensity
91	91.1	1	1	5.59	0.4	99500	164445	7.19	CAEEL	G5EDU3
#	Filename	z	Score	Spectrum	Variable	Sequence	Sequence Map	MH+	MH+	MH+
				Intensity	Sites			Matched	Mass Shift	Error
								(Da)	(Da)	(ppm)
1	ECOLIOP5048HC.2622.2622.2	2	5.59	99500		(K)NGSVKR(V)	(K)N/G S|V K/R(V)	660.379	-0.0113	-17
Group	Subgroup	Spectra	Distinct	Distinct	% AA	Total	Protein MW	Protein	Species	Database	Protein Name
(#)	(#)	(#)	Peptides	Summed	Coverage	Protein	(Da)	pI		Accession #
			(#)	MS/MS Search		Spectral
				Score		Intensity
92	92.1	1	1	5.56	3	76600	74226.9	5.98	CAEEL	P34672
#	Filename	z	Score	Spectrum	Variable	Sequence	Sequence Map	MH+	MH+	MH+
				Intensity	Sites			Matched	Mass Shift	Error
								(Da)	(Da)	(ppm)
1	ECOLIOP5048HC.4123.4123.3	3	5.56	76600	M163m	(R)RFPTLDTVVAAGFmMPHEK(D)	(R)R F P T L D T V V A A\G F/m M/P H E K(D)	2147.08	15.9718	-10.7
Group	Subgroup	Spectra	Distinct	Distinct	% AA	Total	Protein MW	Protein	Species	Database	Protein Name
(#)	(#)	(#)	Peptides	Summed	Coverage	Protein	(Da)	pI		Accession #
			(#)	MS/MS Search		Spectral
				Score		Intensity
93	93.1	1	1	5.5	0.5	10900	117809	6.43	CAEEL	O76571
#	Filename	z	Score	Spectrum	Variable	Sequence	Sequence Map	MH+	MH+	MH+
				Intensity	Sites			Matched	Mass Shift	Error
								(Da)	(Da)	(ppm)
1	ECOLIOP5048HC.2920.2920.2	2	5.5	10900		(K)IVEAGR(L)	(K)I/V E/A/G R(L)	644.373	0.0008	1.3
Group	Subgroup	Spectra	Distinct	Distinct	% AA	Total	Protein MW	Protein	Species	Database	Protein Name
(#)	(#)	(#)	Peptides	Summed	Coverage	Protein	(Da)	pI		Accession #
			(#)	MS/MS Search		Spectral
				Score		Intensity
94	94.1	1	1	5.48	2.1	54100	80126.6	8.61	CAEEL	Q18563
#	Filename	z	Score	Spectrum	Variable	Sequence	Sequence Map	MH+	MH+	MH+
				Intensity	Sites			Matched	Mass Shift	Error
								(Da)	(Da)	(ppm)
1	ECOLIOP5048HA.5294.5294.3	3	5.48	54100		(R)MGKSGDDGSQEPQGIR(H)	(R)M G K S G D D G|S|Q E/P Q G I R(H)	1661.76	-0.0163	-9.8
Group	Subgroup	Spectra	Distinct	Distinct	% AA	Total	Protein MW	Protein	Species	Database	Protein Name
(#)	(#)	(#)	Peptides	Summed	Coverage	Protein	(Da)	pI		Accession #
			(#)	MS/MS Search		Spectral
				Score		Intensity
95	95.1	1	1	5.44	0.9	112000	87766.2	9.17	CAEEL	B7FAS5
#	Filename	z	Score	Spectrum	Variable	Sequence	Sequence Map	MH+	MH+	MH+
				Intensity	Sites			Matched	Mass Shift	Error
								(Da)	(Da)	(ppm)
1	ECOLIOP5048HA.2629.2629.2	2	5.44	112000		(K)SGGPSKK(M)	(K)S/G|G P S K\K(M)	660.367	-0.0021	-3.2
Group	Subgroup	Spectra	Distinct	Distinct	% AA	Total	Protein MW	Protein	Species	Database	Protein Name
(#)	(#)	(#)	Peptides	Summed	Coverage	Protein	(Da)	pI		Accession #
			(#)	MS/MS Search		Spectral
				Score		Intensity
96	96.1	1	1	5.29	1.8	2430	50319.4	6.33	CAEEL	O45870
#	Filename	z	Score	Spectrum	Variable	Sequence	Sequence Map	MH+	MH+	MH+
				Intensity	Sites			Matched	Mass Shift	Error
								(Da)	(Da)	(ppm)
1	ECOLIOP5048HA.2399.2399.2	2	5.29	2430		(R)RESFAALR(R)	(R)R/E/S F A A L R(R)	949.521	-0.0106	-11.2
Group	Subgroup	Spectra	Distinct	Distinct	% AA	Total	Protein MW	Protein	Species	Database	Protein Name
(#)	(#)	(#)	Peptides	Summed	Coverage	Protein	(Da)	pI		Accession #
			(#)	MS/MS Search		Spectral
				Score		Intensity
97	97.1	1	1	5.24	2.1	23600	102802	7.73	CAEEL	A0A078BS72
#	Filename	z	Score	Spectrum	Variable	Sequence	Sequence Map	MH+	MH+	MH+
				Intensity	Sites			Matched	Mass Shift	Error
								(Da)	(Da)	(ppm)
1	ECOLIOP5048HC.4334.4334.2	2	5.24	23600	M37m	(K)RMAGmSQLKSTFSISLESQR(T)	(K)R M/A G m/S Q L K S T F S I S L/E S Q R(T)	2257.14	16.0133	8.1
Group	Subgroup	Spectra	Distinct	Distinct	% AA	Total	Protein MW	Protein	Species	Database	Protein Name
(#)	(#)	(#)	Peptides	Summed	Coverage	Protein	(Da)	pI		Accession #
			(#)	MS/MS Search		Spectral
				Score		Intensity
98	98.1	1	1	5.23	0.8	5540	118713	5.87	CAEEL	Q17657
#	Filename	z	Score	Spectrum	Variable	Sequence	Sequence Map	MH+	MH+	MH+
				Intensity	Sites			Matched	Mass Shift	Error
								(Da)	(Da)	(ppm)
1	ECOLIOP5048HC.3424.3424.2	2	5.23	5540		(K)CQRWSVPDK(N)	(K)C Q R W/S\V|P D|K(N)	1175.56	-0.0173	-14.7
Group	Subgroup	Spectra	Distinct	Distinct	% AA	Total	Protein MW	Protein	Species	Database	Protein Name
(#)	(#)	(#)	Peptides	Summed	Coverage	Protein	(Da)	pI		Accession #
			(#)	MS/MS Search		Spectral
				Score		Intensity
99	99.1	3	1	5.22	4.5	189000	46776.7	7.82	CAEEL	H2L0B0
#	Filename	z	Score	Spectrum	Variable	Sequence	Sequence Map	MH+	MH+	MH+
				Intensity	Sites			Matched	Mass Shift	Error
								(Da)	(Da)	(ppm)
1	ECOLIOP5048HC.4038.4038.2	2	5.22	63000	M131m M136m	(R)EIVHRmDGFSmFLKPAPR(G)	(R)E I V H R m\D G|F S m/F\L K/P A P R(G)	2131.09	31.9593	-14.1
2	ECOLIOP5048HB.4048.4062.2	2	4.68	63200	M131m M136m	(R)EIVHRmDGFSmFLKPAPR(G)	(R)E I V H R m\D G|F S m/F L K/P A P R(G)	2131.09	31.9568	-15.3
3	ECOLIOP5048HC.4026.4074.2	2	4.5	63000	M131m M136m	(R)EIVHRmDGFSmFLKPAPR(G)	(R)E I V H R m\D G|F S m/F/L K P A P R(G)	2131.09	31.9593	-14.1
Group	Subgroup	Spectra	Distinct	Distinct	% AA	Total	Protein MW	Protein	Species	Database	Protein Name
(#)	(#)	(#)	Peptides	Summed	Coverage	Protein	(Da)	pI		Accession #
			(#)	MS/MS Search		Spectral
				Score		Intensity
100	100.1	1	1	5.2	5.9	4360	27268.8	5.15	CAEEL	G5EEN8
#	Filename	z	Score	Spectrum	Variable	Sequence	Sequence Map	MH+	MH+	MH+
				Intensity	Sites			Matched	Mass Shift	Error
								(Da)	(Da)	(ppm)
1	ECOLIOP5048HA.3388.3397.3	3	5.2	4360		(R)KEESNMMMFTNSSK(R)	(R)K E E\S N/M M M\F T N S\S K(R)	1663.71	-0.0185	-11.1
Group	Subgroup	Spectra	Distinct	Distinct	% AA	Total	Protein MW	Protein	Species	Database	Protein Name
(#)	(#)	(#)	Peptides	Summed	Coverage	Protein	(Da)	pI		Accession #
			(#)	MS/MS Search		Spectral
				Score		Intensity
101	101.1	1	1	5.2	4.6	22000	30089.2	7.88	CAEEL	Q20091
#	Filename	z	Score	Spectrum	Variable	Sequence	Sequence Map	MH+	MH+	MH+
				Intensity	Sites			Matched	Mass Shift	Error
								(Da)	(Da)	(ppm)
1	ECOLIOP5048HC.3902.3915.3	3	5.2	22000		(R)SMQNEIVYCRGSAK(D)	(R)S M/Q/N E I V\Y C R G S A/K(D)	1642.77	-0.0312	-19
Group	Subgroup	Spectra	Distinct	Distinct	% AA	Total	Protein MW	Protein	Species	Database	Protein Name
(#)	(#)	(#)	Peptides	Summed	Coverage	Protein	(Da)	pI		Accession #
			(#)	MS/MS Search		Spectral
				Score		Intensity
102	102.1	1	1	5.17	2.6	15200	61727.4	5.62	CAEEL	G1K0V0
#	Filename	z	Score	Spectrum	Variable	Sequence	Sequence Map	MH+	MH+	MH+
				Intensity	Sites			Matched	Mass Shift	Error
								(Da)	(Da)	(ppm)
1	ECOLIOP5048HB.3420.3420.3	3	5.17	15200		(K)LYYQMESAFDNDMR(T)	(K)L/Y Y Q/M E S A F D N/D M R(T)	1782.75	-0.026	-14.6
Group	Subgroup	Spectra	Distinct	Distinct	% AA	Total	Protein MW	Protein	Species	Database	Protein Name
(#)	(#)	(#)	Peptides	Summed	Coverage	Protein	(Da)	pI		Accession #
			(#)	MS/MS Search		Spectral
				Score		Intensity
103	103.1	3	1	5.16	8.2	22300	19593.1	9.56	CAEEL	Q19165
#	Filename	z	Score	Spectrum	Variable	Sequence	Sequence Map	MH+	MH+	MH+
				Intensity	Sites			Matched	Mass Shift	Error
								(Da)	(Da)	(ppm)
1	ECOLIOP5048HA.3390.3390.3	3	5.16	9100	M150m M158m	(K)RSmGEEEDHDmMKR(K)	(K)R\S m G E E E|D/H D m M K\R(K)	1750.73	31.991	0.6
2	ECOLIOP5048HC.3396.3396.3	3	4.04	13200	M150m M159m	(K)RSmGEEEDHDMmKR(K)	(K)R S m G E E E|D H/D M m K R(K)	1750.73	31.9923	1.4
Group	Subgroup	Spectra	Distinct	Distinct	% AA	Total	Protein MW	Protein	Species	Database	Protein Name
(#)	(#)	(#)	Peptides	Summed	Coverage	Protein	(Da)	pI		Accession #
			(#)	MS/MS Search		Spectral
				Score		Intensity
104	104.1	2	1	5.15	0.4	8870	148181	5.99	CAEEL	Q95XJ2
#	Filename	z	Score	Spectrum	Variable	Sequence	Sequence Map	MH+	MH+	MH+
				Intensity	Sites			Matched	Mass Shift	Error
								(Da)	(Da)	(ppm)
1	ECOLIOP5048HA.2669.2669.2	2	5.15	3800		(K)INALEK(I)	(K)I/N/A/L E K(I)	687.404	-0.0048	-7
2	ECOLIOP5048HC.2660.2660.2	2	4.65	5070		(K)INALEK(I)	(K)I/N/A/L E K(I)	687.404	-0.004	-5.9
Group	Subgroup	Spectra	Distinct	Distinct	% AA	Total	Protein MW	Protein	Species	Database	Protein Name
(#)	(#)	(#)	Peptides	Summed	Coverage	Protein	(Da)	pI		Accession #
			(#)	MS/MS Search		Spectral
				Score		Intensity
105	105.1	1	1	5.13	0.7	22900	201923	5.8	CAEEL	Q18983
#	Filename	z	Score	Spectrum	Variable	Sequence	Sequence Map	MH+	MH+	MH+
				Intensity	Sites			Matched	Mass Shift	Error
								(Da)	(Da)	(ppm)
1	ECOLIOP5048HB.3916.3916.3	3	5.13	22900		(R)SNNMNTLTICGVYR(C)	(R)S N N\M/N|T/L T I/C G V Y R(C)	1642.77	-0.0298	-18.1
Group	Subgroup	Spectra	Distinct	Distinct	% AA	Total	Protein MW	Protein	Species	Database	Protein Name
(#)	(#)	(#)	Peptides	Summed	Coverage	Protein	(Da)	pI		Accession #
			(#)	MS/MS Search		Spectral
				Score		Intensity
106	106.1	1	1	5.12	0.2	17200	460350	5.95	CAEEL	G5EBH3
#	Filename	z	Score	Spectrum	Variable	Sequence	Sequence Map	MH+	MH+	MH+
				Intensity	Sites			Matched	Mass Shift	Error
								(Da)	(Da)	(ppm)
1	ECOLIOP5048HA.4356.4356.2	2	5.12	17200	M2433m	(K)VAAmKSDDYGK(D)	(K)V/A A m/K S D D Y G/K(D)	1184.56	15.9893	-4.7
Group	Subgroup	Spectra	Distinct	Distinct	% AA	Total	Protein MW	Protein	Species	Database	Protein Name
(#)	(#)	(#)	Peptides	Summed	Coverage	Protein	(Da)	pI		Accession #
			(#)	MS/MS Search		Spectral
				Score		Intensity
107	107.1	1	1	5	2.9	15000	40441.2	7.88	CAEEL	Q9XXS2
#	Filename	z	Score	Spectrum	Variable	Sequence	Sequence Map	MH+	MH+	MH+
				Intensity	Sites			Matched	Mass Shift	Error
								(Da)	(Da)	(ppm)
1	ECOLIOP5048HC.9468.9468.2	2	5	15000		(K)IITLANQKCK(E)	(K)I/I T L A N/Q K C K(E)	1188.68	-0.0003	-0.2
Group	Subgroup	Spectra	Distinct	Distinct	% AA	Total	Protein MW	Protein	Species	Database	Protein Name
(#)	(#)	(#)	Peptides	Summed	Coverage	Protein	(Da)	pI		Accession #
			(#)	MS/MS Search		Spectral
				Score		Intensity
108	108.1	1	1	4.99	1.3	1930	140947	5.55	CAEEL	D7SFM3
#	Filename	z	Score	Spectrum	Variable	Sequence	Sequence Map	MH+	MH+	MH+
				Intensity	Sites			Matched	Mass Shift	Error
								(Da)	(Da)	(ppm)
1	ECOLIOP5048HA.4150.4150.3	3	4.99	1930		(K)EYCQTLCLVSRMFLESK(T)	(K)E Y C/Q/T L C\L V S R M F L E S K(T)	2164.02	0.0251	11.6
Group	Subgroup	Spectra	Distinct	Distinct	% AA	Total	Protein MW	Protein	Species	Database	Protein Name
(#)	(#)	(#)	Peptides	Summed	Coverage	Protein	(Da)	pI		Accession #
			(#)	MS/MS Search		Spectral
				Score		Intensity
109	109.1	1	1	4.99	7.3	1410	13500.4	10.4	CAEEL	P04255
#	Filename	z	Score	Spectrum	Variable	Sequence	Sequence Map	MH+	MH+	MH+
				Intensity	Sites			Matched	Mass Shift	Error
								(Da)	(Da)	(ppm)
1	ECOLIOP5048HB.4076.4076.2	2	4.99	1410		(R)LILPGELAK(H)	(R)L I|L/P/G E L A K(H)	953.603	-0.0103	-10.8
Group	Subgroup	Spectra	Distinct	Distinct	% AA	Total	Protein MW	Protein	Species	Database	Protein Name
(#)	(#)	(#)	Peptides	Summed	Coverage	Protein	(Da)	pI		Accession #
			(#)	MS/MS Search		Spectral
				Score		Intensity
110	110.1	1	1	4.92	4	2560	24317.5	11.32	CAEEL	Q17561
#	Filename	z	Score	Spectrum	Variable	Sequence	Sequence Map	MH+	MH+	MH+
				Intensity	Sites			Matched	Mass Shift	Error
								(Da)	(Da)	(ppm)
1	ECOLIOP5048HA.4191.4191.3	3	4.92	2560		(K)FAGVSLDGK(E)	(K)F A\G V/S/L/D/G/K(E)	893.473	-0.0106	-11.9
Group	Subgroup	Spectra	Distinct	Distinct	% AA	Total	Protein MW	Protein	Species	Database	Protein Name
(#)	(#)	(#)	Peptides	Summed	Coverage	Protein	(Da)	pI		Accession #
			(#)	MS/MS Search		Spectral
				Score		Intensity
111	111.1	2	1	4.87	2.4	127000	94171.3	6.19	CAEEL	O17744
#	Filename	z	Score	Spectrum	Variable	Sequence	Sequence Map	MH+	MH+	MH+
				Intensity	Sites			Matched	Mass Shift	Error
								(Da)	(Da)	(ppm)
1	ECOLIOP5048HA.4086.4086.2	2	4.87	63900		(K)YAYNNITDGAEAVLLSTYGK(S)	(K)Y A Y N N I T D G\A E A|V L L S/T Y G K(S)	2163.06	-0.0111	-5.1
2	ECOLIOP5048HB.4085.4085.2	2	2.63	63200		(K)YAYNNITDGAEAVLLSTYGK(S)	(K)Y A Y N N I\T D G A E A\V L L S/T Y G K(S)	2163.06	-0.0097	-4.5
Group	Subgroup	Spectra	Distinct	Distinct	% AA	Total	Protein MW	Protein	Species	Database	Protein Name
(#)	(#)	(#)	Peptides	Summed	Coverage	Protein	(Da)	pI		Accession #
			(#)	MS/MS Search		Spectral
				Score		Intensity
112	112.1	1	1	4.84	0.9	49000	105064	8.55	CAEEL	H2L080
#	Filename	z	Score	Spectrum	Variable	Sequence	Sequence Map	MH+	MH+	MH+
				Intensity	Sites			Matched	Mass Shift	Error
								(Da)	(Da)	(ppm)
1	ECOLIOP5048HA.2998.2998.2	2	4.84	49000	M45m	(R)DATEEEImR(E)	(R)D/A T E E/E/I m R(E)	1093.48	16.0065	10.5
Group	Subgroup	Spectra	Distinct	Distinct	% AA	Total	Protein MW	Protein	Species	Database	Protein Name
(#)	(#)	(#)	Peptides	Summed	Coverage	Protein	(Da)	pI		Accession #
			(#)	MS/MS Search		Spectral
				Score		Intensity
113	113.1	1	1	4.83	3.6	3770	29003.3	9.04	CAEEL	Q9N5U6
#	Filename	z	Score	Spectrum	Variable	Sequence	Sequence Map	MH+	MH+	MH+
				Intensity	Sites			Matched	Mass Shift	Error
								(Da)	(Da)	(ppm)
1	ECOLIOP5048HC.3302.3302.2	2	4.83	3770		(K)ELAAAAAEK(Q)	(K)E L/A/A A/A A E K(Q)	873.468	-0.0077	-8.8
Group	Subgroup	Spectra	Distinct	Distinct	% AA	Total	Protein MW	Protein	Species	Database	Protein Name
(#)	(#)	(#)	Peptides	Summed	Coverage	Protein	(Da)	pI		Accession #
			(#)	MS/MS Search		Spectral
				Score		Intensity
114	114.1	1	1	4.78	3.8	21500	40568.8	5.62	CAEEL	Q11123
#	Filename	z	Score	Spectrum	Variable	Sequence	Sequence Map	MH+	MH+	MH+
				Intensity	Sites			Matched	Mass Shift	Error
								(Da)	(Da)	(ppm)
1	ECOLIOP5048HA.3929.3929.3	3	4.78	21500		(R)ITQEMKNGADCFTK(Y)	(R)I/T/Q E M K N G A D C F T/K(Y)	1642.76	-0.0249	-15.2
Group	Subgroup	Spectra	Distinct	Distinct	% AA	Total	Protein MW	Protein	Species	Database	Protein Name
(#)	(#)	(#)	Peptides	Summed	Coverage	Protein	(Da)	pI		Accession #
			(#)	MS/MS Search		Spectral
				Score		Intensity
115	115.1	1	1	4.66	7	3700	18673.9	5.06	CAEEL	P19625
#	Filename	z	Score	Spectrum	Variable	Sequence	Sequence Map	MH+	MH+	MH+
				Intensity	Sites			Matched	Mass Shift	Error
								(Da)	(Da)	(ppm)
1	ECOLIOP5048HA.3972.3972.2	2	4.66	3700		(K)DCGKIKEDDLIK(I)	(K)D C G K I K E D D/L I K(I)	1433.73	-0.0115	-8
Group	Subgroup	Spectra	Distinct	Distinct	% AA	Total	Protein MW	Protein	Species	Database	Protein Name
(#)	(#)	(#)	Peptides	Summed	Coverage	Protein	(Da)	pI		Accession #
			(#)	MS/MS Search		Spectral
				Score		Intensity
116	116.1	1	1	4.66	4.8	8090	21768.3	10.25	CAEEL	Q965N5
#	Filename	z	Score	Spectrum	Variable	Sequence	Sequence Map	MH+	MH+	MH+
				Intensity	Sites			Matched	Mass Shift	Error
								(Da)	(Da)	(ppm)
1	ECOLIOP5048HC.4521.4521.3	3	4.66	8090		(K)MIGIERTKK(R)	(K)M I G/I/E/R\T K K(R)	1075.63	0.0206	19.2
Group	Subgroup	Spectra	Distinct	Distinct	% AA	Total	Protein MW	Protein	Species	Database	Protein Name
(#)	(#)	(#)	Peptides	Summed	Coverage	Protein	(Da)	pI		Accession #
			(#)	MS/MS Search		Spectral
				Score		Intensity
117	117.1	1	1	4.65	1.6	6900	48788.4	8.39	CAEEL	O01755
#	Filename	z	Score	Spectrum	Variable	Sequence	Sequence Map	MH+	MH+	MH+
				Intensity	Sites			Matched	Mass Shift	Error
								(Da)	(Da)	(ppm)
1	ECOLIOP5048HB.4912.4912.2	2	4.65	6900		(K)GNVVISR(N)	(K)G N V\V/I/S R(N)	744.436	-0.0024	-3.3
Group	Subgroup	Spectra	Distinct	Distinct	% AA	Total	Protein MW	Protein	Species	Database	Protein Name
(#)	(#)	(#)	Peptides	Summed	Coverage	Protein	(Da)	pI		Accession #
			(#)	MS/MS Search		Spectral
				Score		Intensity
118	118.1	1	1	4.64	9.5	57300	23470.7	10.24	CAEEL	P49391
#	Filename	z	Score	Spectrum	Variable	Sequence	Sequence Map	MH+	MH+	MH+
				Intensity	Sites			Matched	Mass Shift	Error
								(Da)	(Da)	(ppm)
1	ECOLIOP5048HC.5168.5168.2	2	4.64	57300	M21m M22m M23m	(R)GAADLLSTALYKNEmmmSR(R)	(R)G A A D L L S T A L Y K N E m m/m/S R(R)	2102.01	48.0084	11
Group	Subgroup	Spectra	Distinct	Distinct	% AA	Total	Protein MW	Protein	Species	Database	Protein Name
(#)	(#)	(#)	Peptides	Summed	Coverage	Protein	(Da)	pI		Accession #
			(#)	MS/MS Search		Spectral
				Score		Intensity
119	119.1	1	1	4.58	2.6	1310	54919.2	7.81	CAEEL	G5ECM6
#	Filename	z	Score	Spectrum	Variable	Sequence	Sequence Map	MH+	MH+	MH+
				Intensity	Sites			Matched	Mass Shift	Error
								(Da)	(Da)	(ppm)
1	ECOLIOP5048HB.5319.5319.3	3	4.58	1310	M470m	(R)LGFNPYGDmVEKR(L)	(R)L/G/F N P Y G/D m\V E\K R(L)	1525.75	15.9641	-20
Group	Subgroup	Spectra	Distinct	Distinct	% AA	Total	Protein MW	Protein	Species	Database	Protein Name
(#)	(#)	(#)	Peptides	Summed	Coverage	Protein	(Da)	pI		Accession #
			(#)	MS/MS Search		Spectral
				Score		Intensity
120	120.1	1	1	4.53	3.7	7630	27644.7	9.14	CAEEL	O02121
#	Filename	z	Score	Spectrum	Variable	Sequence	Sequence Map	MH+	MH+	MH+
				Intensity	Sites			Matched	Mass Shift	Error
								(Da)	(Da)	(ppm)
1	ECOLIOP5048HA.3436.3436.2	2	4.53	7630	M5m	(R)SmYNPFCLK(M)	(R)S/m/Y N\P F C/L/K(M)	1159.53	16.0177	19.4
Group	Subgroup	Spectra	Distinct	Distinct	% AA	Total	Protein MW	Protein	Species	Database	Protein Name
(#)	(#)	(#)	Peptides	Summed	Coverage	Protein	(Da)	pI		Accession #
			(#)	MS/MS Search		Spectral
				Score		Intensity
121	121.1	1	1	4.48	2.6	9810	60864.8	9.02	CAEEL	Q9N4H0
#	Filename	z	Score	Spectrum	Variable	Sequence	Sequence Map	MH+	MH+	MH+
				Intensity	Sites			Matched	Mass Shift	Error
								(Da)	(Da)	(ppm)
1	ECOLIOP5048HB.3996.3996.3	3	4.48	9810	M432m	(K)mVTGRPHLEEDGSR(R)	(K)m V T G\R P H L E E/D/G|S R(R)	1583.76	15.9632	-19.8
Group	Subgroup	Spectra	Distinct	Distinct	% AA	Total	Protein MW	Protein	Species	Database	Protein Name
(#)	(#)	(#)	Peptides	Summed	Coverage	Protein	(Da)	pI		Accession #
			(#)	MS/MS Search		Spectral
				Score		Intensity
122	122.1	1	1	4.42	1.6	78700	100673	5.4	CAEEL	O17944
#	Filename	z	Score	Spectrum	Variable	Sequence	Sequence Map	MH+	MH+	MH+
				Intensity	Sites			Matched	Mass Shift	Error
								(Da)	(Da)	(ppm)
1	ECOLIOP5048HC.5281.5281.3	3	4.42	78700	M865m	(K)GDSPNHARGYmDAVR(R)	(K)G D S P\N H A\R|G Y m/D/A V R(R)	1645.75	15.9833	-7
Group	Subgroup	Spectra	Distinct	Distinct	% AA	Total	Protein MW	Protein	Species	Database	Protein Name
(#)	(#)	(#)	Peptides	Summed	Coverage	Protein	(Da)	pI		Accession #
			(#)	MS/MS Search		Spectral
				Score		Intensity
123	123.1	1	1	4.35	2.7	58600	38618.7	9.65	CAEEL	P91475
#	Filename	z	Score	Spectrum	Variable	Sequence	Sequence Map	MH+	MH+	MH+
				Intensity	Sites			Matched	Mass Shift	Error
								(Da)	(Da)	(ppm)
1	ECOLIOP5048HB.2357.2357.3	3	4.35	58600		(K)RLTSTLSNR(Y)	(K)R L T S T/L/S N R(Y)	1047.59	0.0044	4.2
Group	Subgroup	Spectra	Distinct	Distinct	% AA	Total	Protein MW	Protein	Species	Database	Protein Name
(#)	(#)	(#)	Peptides	Summed	Coverage	Protein	(Da)	pI		Accession #
			(#)	MS/MS Search		Spectral
				Score		Intensity
124	124.1	1	1	4.35	5.6	14400	11789	8.96	CAEEL	Q21377
#	Filename	z	Score	Spectrum	Variable	Sequence	Sequence Map	MH+	MH+	MH+
				Intensity	Sites			Matched	Mass Shift	Error
								(Da)	(Da)	(ppm)
1	ECOLIOP5048HC.2414.2414.2	2	4.35	14400		(K)NKSSNK(T)	(K)N/K|S|S\N K(T)	677.358	0.0008	1.2
Group	Subgroup	Spectra	Distinct	Distinct	% AA	Total	Protein MW	Protein	Species	Database	Protein Name
(#)	(#)	(#)	Peptides	Summed	Coverage	Protein	(Da)	pI		Accession #
			(#)	MS/MS Search		Spectral
				Score		Intensity
125	125.1	1	1	4.34	3.7	6720	65135.7	5.98	CAEEL	Q21234
#	Filename	z	Score	Spectrum	Variable	Sequence	Sequence Map	MH+	MH+	MH+
				Intensity	Sites			Matched	Mass Shift	Error
								(Da)	(Da)	(ppm)
1	ECOLIOP5048HB.4098.4098.3	3	4.34	6720	M467m	(R)GDNAGLPPVImAPSTNDEVCK(L)	(R)G D N A\G L P P V I m/A/P/S T N\D E V C K(L)	2185.03	15.9726	-10.1
Group	Subgroup	Spectra	Distinct	Distinct	% AA	Total	Protein MW	Protein	Species	Database	Protein Name
(#)	(#)	(#)	Peptides	Summed	Coverage	Protein	(Da)	pI		Accession #
			(#)	MS/MS Search		Spectral
				Score		Intensity
126	126.1	2	1	4.28	6.2	0	34485.1	9.69	CAEEL	A0A3P6MY32
#	Filename	z	Score	Spectrum	Variable	Sequence	Sequence Map	MH+	MH+	MH+
				Intensity	Sites			Matched	Mass Shift	Error
								(Da)	(Da)	(ppm)
1	ECOLIOP5048HA.3371.3371.3	3	4.28	17900	M58m	(R)mETMFSGGAGSSSAGAAK(D)	(R)m E T M F S/G/G/A G/S S S A/G/A A/K(D)	1646.71	15.9938	-0.7
Group	Subgroup	Spectra	Distinct	Distinct	% AA	Total	Protein MW	Protein	Species	Database	Protein Name
(#)	(#)	(#)	Peptides	Summed	Coverage	Protein	(Da)	pI		Accession #
			(#)	MS/MS Search		Spectral
				Score		Intensity
127	127.1	1	1	4.25	1.6	34300	152982	9.52	CAEEL	O17582
#	Filename	z	Score	Spectrum	Variable	Sequence	Sequence Map	MH+	MH+	MH+
				Intensity	Sites			Matched	Mass Shift	Error
								(Da)	(Da)	(ppm)
1	ECOLIOP5048HB.4753.4767.2	2	4.25	34300		(R)CPHCPFTTSTVTRLNRHSGGHK(L)	(R)C P\H C P F T T S T V T R L N R H S G/G H K(L)	2550.22	-0.0034	-1.3
Group	Subgroup	Spectra	Distinct	Distinct	% AA	Total	Protein MW	Protein	Species	Database	Protein Name
(#)	(#)	(#)	Peptides	Summed	Coverage	Protein	(Da)	pI		Accession #
			(#)	MS/MS Search		Spectral
				Score		Intensity
128	128.1	1	1	4.17	1.4	153000	62277	6.23	CAEEL	Q8IG67
#	Filename	z	Score	Spectrum	Variable	Sequence	Sequence Map	MH+	MH+	MH+
				Intensity	Sites			Matched	Mass Shift	Error
								(Da)	(Da)	(ppm)
1	ECOLIOP5048HC.2395.2395.3	3	4.17	153000	M372m	(R)VmRLLENR(H)	(R)V m/R/L/L E N R(H)	1030.58	16.0122	16.5
Group	Subgroup	Spectra	Distinct	Distinct	% AA	Total	Protein MW	Protein	Species	Database	Protein Name
(#)	(#)	(#)	Peptides	Summed	Coverage	Protein	(Da)	pI		Accession #
			(#)	MS/MS Search		Spectral
				Score		Intensity
129	129.1	1	1	4.14	3.4	2700	20298.5	9.12	CAEEL	Q22966
#	Filename	z	Score	Spectrum	Variable	Sequence	Sequence Map	MH+	MH+	MH+
				Intensity	Sites			Matched	Mass Shift	Error
								(Da)	(Da)	(ppm)
1	ECOLIOP5048HB.2544.2544.2	2	4.14	2700		(R)ARRCIK(M)	(R)A R R/C I K(M)	803.467	0.004	5
Group	Subgroup	Spectra	Distinct	Distinct	% AA	Total	Protein MW	Protein	Species	Database	Protein Name
(#)	(#)	(#)	Peptides	Summed	Coverage	Protein	(Da)	pI		Accession #
			(#)	MS/MS Search		Spectral
				Score		Intensity
130	130.1	1	1	4.13	8.4	9250	13288.8	5.65	CAEEL	Q52GX5
#	Filename	z	Score	Spectrum	Variable	Sequence	Sequence Map	MH+	MH+	MH+
				Intensity	Sites			Matched	Mass Shift	Error
								(Da)	(Da)	(ppm)
1	ECOLIOP5048HB.8386.8386.3	3	4.13	9250		(R)VELRLTSVNR(H)	(R)V E L R L T/S V\N/R(H)	1186.69	0.0088	7.4
Group	Subgroup	Spectra	Distinct	Distinct	% AA	Total	Protein MW	Protein	Species	Database	Protein Name
(#)	(#)	(#)	Peptides	Summed	Coverage	Protein	(Da)	pI		Accession #
			(#)	MS/MS Search		Spectral
				Score		Intensity
131	131.1	1	1	4.11	0.5	18400	198195	5.14	CAEEL	Q19350
#	Filename	z	Score	Spectrum	Variable	Sequence	Sequence Map	MH+	MH+	MH+
				Intensity	Sites			Matched	Mass Shift	Error
								(Da)	(Da)	(ppm)
1	ECOLIOP5048HC.4348.4369.2	2	4.11	18400		(K)LCDKVDYCK(D)	(K)L C D/K V/D Y/C/K(D)	1200.54	0.0116	9.7
Group	Subgroup	Spectra	Distinct	Distinct	% AA	Total	Protein MW	Protein	Species	Database	Protein Name
(#)	(#)	(#)	Peptides	Summed	Coverage	Protein	(Da)	pI		Accession #
			(#)	MS/MS Search		Spectral
				Score		Intensity
132	132.1	1	1	4.05	1.1	3840	58787.5	7	CAEEL	G5EDP9
#	Filename	z	Score	Spectrum	Variable	Sequence	Sequence Map	MH+	MH+	MH+
				Intensity	Sites			Matched	Mass Shift	Error
								(Da)	(Da)	(ppm)
1	ECOLIOP5048HB.2658.2658.2	2	4.05	3840		(R)IAQLDK(A)	(R)I/A|Q\L/D K(A)	687.404	-0.0042	-6.1
Group	Subgroup	Spectra	Distinct	Distinct	% AA	Total	Protein MW	Protein	Species	Database	Protein Name
(#)	(#)	(#)	Peptides	Summed	Coverage	Protein	(Da)	pI		Accession #
			(#)	MS/MS Search		Spectral
				Score		Intensity
133	133.1	1	1	4.01	2.3	10900	101652	7.55	CAEEL	Q20733
#	Filename	z	Score	Spectrum	Variable	Sequence	Sequence Map	MH+	MH+	MH+
				Intensity	Sites			Matched	Mass Shift	Error
								(Da)	(Da)	(ppm)
1	ECOLIOP5048HB.4550.4550.4	4	4.01	10900		(R)VRFNELPNYSTPNHYSVPPRK(C)	(R)V R F N\E L P N\Y S T P N|H/Y/S V P P R K(C)	2515.28	0.0474	18.8
Group	Subgroup	Spectra	Distinct	Distinct	% AA	Total	Protein MW	Protein	Species	Database	Protein Name
(#)	(#)	(#)	Peptides	Summed	Coverage	Protein	(Da)	pI		Accession #
			(#)	MS/MS Search		Spectral
				Score		Intensity
134	134.1	1	1	3.96	2.1	19300	51559.4	8.28	CAEEL	B3WFV4
#	Filename	z	Score	Spectrum	Variable	Sequence	Sequence Map	MH+	MH+	MH+
				Intensity	Sites			Matched	Mass Shift	Error
								(Da)	(Da)	(ppm)
1	ECOLIOP5048HC.4535.4535.3	3	3.96	19300		(R)IQGFTNALKK(V)	(R)I\Q G F T\N|A L K K(V)	1119.65	0.0188	16.8
Group	Subgroup	Spectra	Distinct	Distinct	% AA	Total	Protein MW	Protein	Species	Database	Protein Name
(#)	(#)	(#)	Peptides	Summed	Coverage	Protein	(Da)	pI		Accession #
			(#)	MS/MS Search		Spectral
				Score		Intensity
135	135.1	1	1	3.95	3.5	13000	42720.2	6.44	CAEEL	O62034
#	Filename	z	Score	Spectrum	Variable	Sequence	Sequence Map	MH+	MH+	MH+
				Intensity	Sites			Matched	Mass Shift	Error
								(Da)	(Da)	(ppm)
1	ECOLIOP5048HA.4321.4321.2	2	3.95	13000	M68m	(R)IQKCFEAGmNPEK(V)	(R)I Q|K C F E/A G m N P E K(V)	1551.73	15.9697	-16.1
Group	Subgroup	Spectra	Distinct	Distinct	% AA	Total	Protein MW	Protein	Species	Database	Protein Name
(#)	(#)	(#)	Peptides	Summed	Coverage	Protein	(Da)	pI		Accession #
			(#)	MS/MS Search		Spectral
				Score		Intensity
136	136.1	1	1	3.89	4.6	38000	33173.1	6.55	CAEEL	G5EBH4
#	Filename	z	Score	Spectrum	Variable	Sequence	Sequence Map	MH+	MH+	MH+
				Intensity	Sites			Matched	Mass Shift	Error
								(Da)	(Da)	(ppm)
1	ECOLIOP5048HB.3913.3948.2	2	3.89	38000	M67m	(R)LKNCPNMSPFCmK(I)	(R)L/K|N C\P N M S P F C m/K(I)	1626.73	16.0083	8.1
Group	Subgroup	Spectra	Distinct	Distinct	% AA	Total	Protein MW	Protein	Species	Database	Protein Name
(#)	(#)	(#)	Peptides	Summed	Coverage	Protein	(Da)	pI		Accession #
			(#)	MS/MS Search		Spectral
				Score		Intensity
137	137.1	1	1	3.89	1.4	216000	62597.1	9.8	CAEEL	P91122
#	Filename	z	Score	Spectrum	Variable	Sequence	Sequence Map	MH+	MH+	MH+
				Intensity	Sites			Matched	Mass Shift	Error
								(Da)	(Da)	(ppm)
1	ECOLIOP5048HB.4313.4313.2	2	3.89	216000		(K)KPGKNSPK(D)	(K)K P G\K N/S P K(D)	855.505	0.0064	7.4
Group	Subgroup	Spectra	Distinct	Distinct	% AA	Total	Protein MW	Protein	Species	Database	Protein Name
(#)	(#)	(#)	Peptides	Summed	Coverage	Protein	(Da)	pI		Accession #
			(#)	MS/MS Search		Spectral
				Score		Intensity
138	138.1	1	1	3.87	2.6	51000	54636.5	5.1	CAEEL	O18195
#	Filename	z	Score	Spectrum	Variable	Sequence	Sequence Map	MH+	MH+	MH+
				Intensity	Sites			Matched	Mass Shift	Error
								(Da)	(Da)	(ppm)
1	ECOLIOP5048HC.4314.4344.2	2	3.87	51000		(K)KALDADDDGGTSR(S)	(K)K A L D A|D D D G/G T S R(S)	1320.6	-0.0256	-19.4
Group	Subgroup	Spectra	Distinct	Distinct	% AA	Total	Protein MW	Protein	Species	Database	Protein Name
(#)	(#)	(#)	Peptides	Summed	Coverage	Protein	(Da)	pI		Accession #
			(#)	MS/MS Search		Spectral
				Score		Intensity
139	139.1	1	1	3.85	8.8	3290	19178.7	4.92	CAEEL	P91833
#	Filename	z	Score	Spectrum	Variable	Sequence	Sequence Map	MH+	MH+	MH+
				Intensity	Sites			Matched	Mass Shift	Error
								(Da)	(Da)	(ppm)
1	ECOLIOP5048HC.5266.5266.3	3	3.85	3290	M107m	(R)NHLESVmFADPDSGK(D)	(R)N\H L E S V\m\F A D P/D\S G K(D)	1646.75	15.993	-1.1
Group	Subgroup	Spectra	Distinct	Distinct	% AA	Total	Protein MW	Protein	Species	Database	Protein Name
(#)	(#)	(#)	Peptides	Summed	Coverage	Protein	(Da)	pI		Accession #
			(#)	MS/MS Search		Spectral
				Score		Intensity
140	140.1	1	1	3.8	1.3	111000	50682.4	8.6	CAEEL	D6VPA0
#	Filename	z	Score	Spectrum	Variable	Sequence	Sequence Map	MH+	MH+	MH+
				Intensity	Sites			Matched	Mass Shift	Error
								(Da)	(Da)	(ppm)
1	ECOLIOP5048HB.2630.2630.2	2	3.8	111000		(K)LSGLDR(S)	(K)L/S G|L D/R(S)	660.367	-0.0021	-3.1
Group	Subgroup	Spectra	Distinct	Distinct	% AA	Total	Protein MW	Protein	Species	Database	Protein Name
(#)	(#)	(#)	Peptides	Summed	Coverage	Protein	(Da)	pI		Accession #
			(#)	MS/MS Search		Spectral
				Score		Intensity
141	141.1	1	1	3.7	2	4590	80786.5	9.7	CAEEL	H2L031
#	Filename	z	Score	Spectrum	Variable	Sequence	Sequence Map	MH+	MH+	MH+
				Intensity	Sites			Matched	Mass Shift	Error
								(Da)	(Da)	(ppm)
1	ECOLIOP5048HB.3937.3937.3	3	3.7	4590		(K)TINANSATAAPSFMK(L)	(K)T/I N|A N S A T A A P S F M/K(L)	1523.75	-0.028	-18.4
Group	Subgroup	Spectra	Distinct	Distinct	% AA	Total	Protein MW	Protein	Species	Database	Protein Name
(#)	(#)	(#)	Peptides	Summed	Coverage	Protein	(Da)	pI		Accession #
			(#)	MS/MS Search		Spectral
				Score		Intensity
142	142.1	1	1	3.68	4.7	2950	29277.8	9.15	CAEEL	Q9N4C7
#	Filename	z	Score	Spectrum	Variable	Sequence	Sequence Map	MH+	MH+	MH+
				Intensity	Sites			Matched	Mass Shift	Error
								(Da)	(Da)	(ppm)
1	ECOLIOP5048HB.3971.3971.2	2	3.68	2950		(R)EGPKLIDEFEEK(E)	(R)E G P K/L I D E\F/E E K(E)	1433.72	0.0016	1.1
Group	Subgroup	Spectra	Distinct	Distinct	% AA	Total	Protein MW	Protein	Species	Database	Protein Name
(#)	(#)	(#)	Peptides	Summed	Coverage	Protein	(Da)	pI		Accession #
			(#)	MS/MS Search		Spectral
				Score		Intensity
143	143.1	1	1	3.67	7.4	5190	25026.5	9.75	CAEEL	Q4TTD0
#	Filename	z	Score	Spectrum	Variable	Sequence	Sequence Map	MH+	MH+	MH+
				Intensity	Sites			Matched	Mass Shift	Error
								(Da)	(Da)	(ppm)
1	ECOLIOP5048HB.3405.3405.3	3	3.67	5190	M202m	(K)NMTDENGSVDGmQSRK(S)	(K)N/M T D E N G S V\D/G\m\Q S R K(S)	1768.76	15.9597	-19.7
Group	Subgroup	Spectra	Distinct	Distinct	% AA	Total	Protein MW	Protein	Species	Database	Protein Name
(#)	(#)	(#)	Peptides	Summed	Coverage	Protein	(Da)	pI		Accession #
			(#)	MS/MS Search		Spectral
				Score		Intensity
144	144.1	1	1	3.66	0.6	1340	203241	8.93	CAEEL	H2KYA5
#	Filename	z	Score	Spectrum	Variable	Sequence	Sequence Map	MH+	MH+	MH+
				Intensity	Sites			Matched	Mass Shift	Error
								(Da)	(Da)	(ppm)
1	ECOLIOP5048HB.3477.3477.2	2	3.66	1340		(R)FSVIIDPTGGR(M)	(R)F\S/V/I I D P T/G G R(M)	1161.63	-0.0168	-14.5
Group	Subgroup	Spectra	Distinct	Distinct	% AA	Total	Protein MW	Protein	Species	Database	Protein Name
(#)	(#)	(#)	Peptides	Summed	Coverage	Protein	(Da)	pI		Accession #
			(#)	MS/MS Search		Spectral
				Score		Intensity
145	145.1	1	1	3.65	6.7	14400	23074.6	9.51	CAEEL	D2YW13
#	Filename	z	Score	Spectrum	Variable	Sequence	Sequence Map	MH+	MH+	MH+
				Intensity	Sites			Matched	Mass Shift	Error
								(Da)	(Da)	(ppm)
1	ECOLIOP5048HB.3929.3929.2	2	3.65	14400		(R)QITHENADNANPAK(R)	(R)Q\I\T H E N/A\D N A N/P A/K(R)	1522.72	-0.0143	-9.4
Group	Subgroup	Spectra	Distinct	Distinct	% AA	Total	Protein MW	Protein	Species	Database	Protein Name
(#)	(#)	(#)	Peptides	Summed	Coverage	Protein	(Da)	pI		Accession #
			(#)	MS/MS Search		Spectral
				Score		Intensity
146	146.1	1	1	3.6	14.8	689	10245	10.3	CAEEL	A0A2C9C3B3
#	Filename	z	Score	Spectrum	Variable	Sequence	Sequence Map	MH+	MH+	MH+
				Intensity	Sites			Matched	Mass Shift	Error
								(Da)	(Da)	(ppm)
1	ECOLIOP5048HC.3742.3742.3	3	3.6	689	M70m M79m	(K)mRLEDFGDYmTGNK(K)	(K)m R/L E D F G/D Y\m/T/G N K(K)	1676.74	31.9665	-13.6
Group	Subgroup	Spectra	Distinct	Distinct	% AA	Total	Protein MW	Protein	Species	Database	Protein Name
(#)	(#)	(#)	Peptides	Summed	Coverage	Protein	(Da)	pI		Accession #
			(#)	MS/MS Search		Spectral
				Score		Intensity
147	147.1	1	1	3.59	3.5	54100	41806.6	8.45	CAEEL	O62112
#	Filename	z	Score	Spectrum	Variable	Sequence	Sequence Map	MH+	MH+	MH+
				Intensity	Sites			Matched	Mass Shift	Error
								(Da)	(Da)	(ppm)
1	ECOLIOP5048HA.5290.5290.3	3	3.59	54100	M139m	(R)NIDNNEHCKDmKK(Y)	(R)N I D\N N/E H C K D|m K K(Y)	1645.74	15.9964	0.9
Group	Subgroup	Spectra	Distinct	Distinct	% AA	Total	Protein MW	Protein	Species	Database	Protein Name
(#)	(#)	(#)	Peptides	Summed	Coverage	Protein	(Da)	pI		Accession #
			(#)	MS/MS Search		Spectral
				Score		Intensity
148	148.1	1	1	3.58	4.3	63200	50918.3	6.26	CAEEL	G5ECB6
#	Filename	z	Score	Spectrum	Variable	Sequence	Sequence Map	MH+	MH+	MH+
				Intensity	Sites			Matched	Mass Shift	Error
								(Da)	(Da)	(ppm)
1	ECOLIOP5048HB.4153.4153.2	2	3.58	63200		(K)IAKPCGELLAEAMLHHMNK(R)	(K)I A K P\C G E|L L A/E A M L H/H/M N K(R)	2163.09	-0.0374	-17.3
Group	Subgroup	Spectra	Distinct	Distinct	% AA	Total	Protein MW	Protein	Species	Database	Protein Name
(#)	(#)	(#)	Peptides	Summed	Coverage	Protein	(Da)	pI		Accession #
			(#)	MS/MS Search		Spectral
				Score		Intensity
149	149.1	1	1	3.56	3.3	16800	52312.3	5.84	CAEEL	Q18924
#	Filename	z	Score	Spectrum	Variable	Sequence	Sequence Map	MH+	MH+	MH+
				Intensity	Sites			Matched	Mass Shift	Error
								(Da)	(Da)	(ppm)
1	ECOLIOP5048HB.3735.3735.3	3	3.56	16800		(R)FTQAYSADSMCSPSR(A)	(R)F T\Q A Y S/A D S M C S P S R(A)	1707.71	-0.0191	-11.2
Group	Subgroup	Spectra	Distinct	Distinct	% AA	Total	Protein MW	Protein	Species	Database	Protein Name
(#)	(#)	(#)	Peptides	Summed	Coverage	Protein	(Da)	pI		Accession #
			(#)	MS/MS Search		Spectral
				Score		Intensity
150	150.1	1	1	3.44	27.2	4170	5493.6	11.64	CAEEL	E0AHA5
#	Filename	z	Score	Spectrum	Variable	Sequence	Sequence Map	MH+	MH+	MH+
				Intensity	Sites			Matched	Mass Shift	Error
								(Da)	(Da)	(ppm)
1	ECOLIOP5048HA.3958.3958.3	3	3.44	4170	M21m	(K)EKSmDCLIPQSR(L)	(K)E/K S m D/C/L I\P Q S R(L)	1463.7	16.007	8.2
Group	Subgroup	Spectra	Distinct	Distinct	% AA	Total	Protein MW	Protein	Species	Database	Protein Name
(#)	(#)	(#)	Peptides	Summed	Coverage	Protein	(Da)	pI		Accession #
			(#)	MS/MS Search		Spectral
				Score		Intensity
151	151.1	1	1	3.44	5	51000	28425.9	4.73	CAEEL	Q966F4
#	Filename	z	Score	Spectrum	Variable	Sequence	Sequence Map	MH+	MH+	MH+
				Intensity	Sites			Matched	Mass Shift	Error
								(Da)	(Da)	(ppm)
1	ECOLIOP5048HC.4370.4370.2	2	3.44	51000		(R)NQGDGIGSVDCAK(G)	(R)N Q G D\G I G S V\D C A/K(G)	1320.59	-0.0078	-5.9
Group	Subgroup	Spectra	Distinct	Distinct	% AA	Total	Protein MW	Protein	Species	Database	Protein Name
(#)	(#)	(#)	Peptides	Summed	Coverage	Protein	(Da)	pI		Accession #
			(#)	MS/MS Search		Spectral
				Score		Intensity
152	152.1	1	1	3.39	6	11700	26091.1	5.38	CAEEL	A0A168H4I0
#	Filename	z	Score	Spectrum	Variable	Sequence	Sequence Map	MH+	MH+	MH+
				Intensity	Sites			Matched	Mass Shift	Error
								(Da)	(Da)	(ppm)
1	ECOLIOP5048HA.3936.3936.3	3	3.39	11700	M160m	(R)IRELTDGYSGADmR(Q)	(R)I R\E/L\T D G Y|S G A D m R(Q)	1583.75	15.9714	-14.7
Group	Subgroup	Spectra	Distinct	Distinct	% AA	Total	Protein MW	Protein	Species	Database	Protein Name
(#)	(#)	(#)	Peptides	Summed	Coverage	Protein	(Da)	pI		Accession #
			(#)	MS/MS Search		Spectral
				Score		Intensity
153	153.1	1	1	3.35	1.3	7500	48315.8	5.31	CAEEL	G5EF21
#	Filename	z	Score	Spectrum	Variable	Sequence	Sequence Map	MH+	MH+	MH+
				Intensity	Sites			Matched	Mass Shift	Error
								(Da)	(Da)	(ppm)
1	ECOLIOP5048HC.2948.2948.2	2	3.35	7500		(K)YGLPTK(V)	(K)Y/G|L/P T K(V)	678.382	-0.0014	-2
Group	Subgroup	Spectra	Distinct	Distinct	% AA	Total	Protein MW	Protein	Species	Database	Protein Name
(#)	(#)	(#)	Peptides	Summed	Coverage	Protein	(Da)	pI		Accession #
			(#)	MS/MS Search		Spectral
				Score		Intensity
154	154.1	1	1	3.31	1.7	15100	113173	5.46	CAEEL	Q21776
#	Filename	z	Score	Spectrum	Variable	Sequence	Sequence Map	MH+	MH+	MH+
				Intensity	Sites			Matched	Mass Shift	Error
								(Da)	(Da)	(ppm)
1	ECOLIOP5048HC.4088.4088.4	4	3.31	15100	M667m	(K)LMCLVRPPQNmHEFQER(A)	(K)L M C L V/R P\P Q/N m H E F Q E R(A)	2185.05	15.9517	-19.6
Group	Subgroup	Spectra	Distinct	Distinct	% AA	Total	Protein MW	Protein	Species	Database	Protein Name
(#)	(#)	(#)	Peptides	Summed	Coverage	Protein	(Da)	pI		Accession #
			(#)	MS/MS Search		Spectral
				Score		Intensity
155	155.1	1	1	3.3	5	78700	32364.4	8.46	CAEEL	Q9XUF2
#	Filename	z	Score	Spectrum	Variable	Sequence	Sequence Map	MH+	MH+	MH+
				Intensity	Sites			Matched	Mass Shift	Error
								(Da)	(Da)	(ppm)
1	ECOLIOP5048HC.5283.5283.3	3	3.3	78700		(K)SEIDSAEEESKFYK(N)	(K)S E I D S A E E/E S K/F\Y/K(N)	1661.75	-0.0209	-12.5
Group	Subgroup	Spectra	Distinct	Distinct	% AA	Total	Protein MW	Protein	Species	Database	Protein Name
(#)	(#)	(#)	Peptides	Summed	Coverage	Protein	(Da)	pI		Accession #
			(#)	MS/MS Search		Spectral
				Score		Intensity
156	156.1	1	1	3.26	5.1	3370	30976.8	5.31	CAEEL	P91061
#	Filename	z	Score	Spectrum	Variable	Sequence	Sequence Map	MH+	MH+	MH+
				Intensity	Sites			Matched	Mass Shift	Error
								(Da)	(Da)	(ppm)
1	ECOLIOP5048HB.3408.3408.3	3	3.26	3370		(R)QGHLTDPGNFECAK(V)	(R)Q|G H/L T/D P\G N F/E C A K(V)	1573.71	-0.0032	-2.1
Group	Subgroup	Spectra	Distinct	Distinct	% AA	Total	Protein MW	Protein	Species	Database	Protein Name
(#)	(#)	(#)	Peptides	Summed	Coverage	Protein	(Da)	pI		Accession #
			(#)	MS/MS Search		Spectral
				Score		Intensity
157	157.1	1	1	3.18	7.5	5540	17025.6	6.12	CAEEL	V6CLD0
#	Filename	z	Score	Spectrum	Variable	Sequence	Sequence Map	MH+	MH+	MH+
				Intensity	Sites			Matched	Mass Shift	Error
								(Da)	(Da)	(ppm)
1	ECOLIOP5048HC.3410.3410.2	2	3.18	5540	M124m	(K)AGGPGVAGEmGEK(G)	(K)A G\G P G V A/G E m|G E|K(G)	1159.54	16.0041	7.8
Group	Subgroup	Spectra	Distinct	Distinct	% AA	Total	Protein MW	Protein	Species	Database	Protein Name
(#)	(#)	(#)	Peptides	Summed	Coverage	Protein	(Da)	pI		Accession #
			(#)	MS/MS Search		Spectral
				Score		Intensity
158	158.1	1	1	3.17	1.4	2720	88281.5	6.02	CAEEL	H2L0L1
#	Filename	z	Score	Spectrum	Variable	Sequence	Sequence Map	MH+	MH+	MH+
				Intensity	Sites			Matched	Mass Shift	Error
								(Da)	(Da)	(ppm)
1	ECOLIOP5048HA.3671.3671.3	3	3.17	2720		(R)LLPIDTHEITK(I)	(R)L L P I D T/H E I\T K(I)	1279.73	0.0121	9.5
Group	Subgroup	Spectra	Distinct	Distinct	% AA	Total	Protein MW	Protein	Species	Database	Protein Name
(#)	(#)	(#)	Peptides	Summed	Coverage	Protein	(Da)	pI		Accession #
			(#)	MS/MS Search		Spectral
				Score		Intensity
159	159.1	1	1	3.15	3.8	8470	30599	5.68	CAEEL	Q9TZB8
#	Filename	z	Score	Spectrum	Variable	Sequence	Sequence Map	MH+	MH+	MH+
				Intensity	Sites			Matched	Mass Shift	Error
								(Da)	(Da)	(ppm)
1	ECOLIOP5048HA.3491.3505.2	2	3.15	8470		(K)NEPAPHAMCK(I)	(K)N E P A P/H\A M C/K(I)	1154.51	-0.0231	-20
Group	Subgroup	Spectra	Distinct	Distinct	% AA	Total	Protein MW	Protein	Species	Database	Protein Name
(#)	(#)	(#)	Peptides	Summed	Coverage	Protein	(Da)	pI		Accession #
			(#)	MS/MS Search		Spectral
				Score		Intensity
160	160.1	1	1	3.13	1.4	3840	44898.6	5.55	CAEEL	Q18535
#	Filename	z	Score	Spectrum	Variable	Sequence	Sequence Map	MH+	MH+	MH+
				Intensity	Sites			Matched	Mass Shift	Error
								(Da)	(Da)	(ppm)
1	ECOLIOP5048HB.2651.2651.2	2	3.13	3840		(K)LAEKAR(R)	(K)L/A|E/K A\R(R)	687.415	-0.0046	-6.7
Group	Subgroup	Spectra	Distinct	Distinct	% AA	Total	Protein MW	Protein	Species	Database	Protein Name
(#)	(#)	(#)	Peptides	Summed	Coverage	Protein	(Da)	pI		Accession #
			(#)	MS/MS Search		Spectral
				Score		Intensity
161	161.1	1	1	3.08	2.4	22300	48437.3	4.33	CAEEL	Q8WQC5
#	Filename	z	Score	Spectrum	Variable	Sequence	Sequence Map	MH+	MH+	MH+
				Intensity	Sites			Matched	Mass Shift	Error
								(Da)	(Da)	(ppm)
1	ECOLIOP5048HA.8541.8541.2	2	3.08	22300		(R)SNLVTGGPRR(L)	(R)S N L V T G/G P\R R(L)	1056.59	0.0072	6.8
Group	Subgroup	Spectra	Distinct	Distinct	% AA	Total	Protein MW	Protein	Species	Database	Protein Name
(#)	(#)	(#)	Peptides	Summed	Coverage	Protein	(Da)	pI		Accession #
			(#)	MS/MS Search		Spectral
				Score		Intensity
162	162.1	2	1	3.04	0.7	3990	84914.4	9.61	CAEEL	O01497
#	Filename	z	Score	Spectrum	Variable	Sequence	Sequence Map	MH+	MH+	MH+
				Intensity	Sites			Matched	Mass Shift	Error
								(Da)	(Da)	(ppm)
1	ECOLIOP5048HA.2530.2530.2	2	3.04	2220		(R)WDDGAR(A)	(R)W D|D G A/R(A)	719.311	0.0013	1.8
2	ECOLIOP5048HB.2528.2528.2	2	0.87	1770		(R)WDDGAR(A)	(R)W D|D G A R(A)	719.311	-0.0028	-3.9
Group	Subgroup	Spectra	Distinct	Distinct	% AA	Total	Protein MW	Protein	Species	Database	Protein Name
(#)	(#)	(#)	Peptides	Summed	Coverage	Protein	(Da)	pI		Accession #
			(#)	MS/MS Search		Spectral
				Score		Intensity
163	163.1	1	1	3	1.1	31600	245538	5.84	CAEEL	Q9U2G0
#	Filename	z	Score	Spectrum	Variable	Sequence	Sequence Map	MH+	MH+	MH+
				Intensity	Sites			Matched	Mass Shift	Error
								(Da)	(Da)	(ppm)
1	ECOLIOP5048HA.4953.4953.3	3	3	31600	M1649m M1655m M1663m	(R)GmCYQIEmSAYLVVVmDTQFYNGK(Y)	(R)G m C Y Q I\E m S A Y L V/V|V m D T\Q/F Y N G K(Y)	2847.29	47.9496	-12.1
Group	Subgroup	Spectra	Distinct	Distinct	% AA	Total	Protein MW	Protein	Species	Database	Protein Name
(#)	(#)	(#)	Peptides	Summed	Coverage	Protein	(Da)	pI		Accession #
			(#)	MS/MS Search		Spectral
				Score		Intensity
164	164.1	1	1	2.98	2.6	3300	55374.1	6.87	CAEEL	A0A131MB05
#	Filename	z	Score	Spectrum	Variable	Sequence	Sequence Map	MH+	MH+	MH+
				Intensity	Sites			Matched	Mass Shift	Error
								(Da)	(Da)	(ppm)
1	ECOLIOP5048HA.3682.3682.3	3	2.98	3300		(R)DESGKDFQFIDER(G)	(R)D E/S G K/D F Q F/I/D E R(G)	1585.71	-0.0181	-11.4
Group	Subgroup	Spectra	Distinct	Distinct	% AA	Total	Protein MW	Protein	Species	Database	Protein Name
(#)	(#)	(#)	Peptides	Summed	Coverage	Protein	(Da)	pI		Accession #
			(#)	MS/MS Search		Spectral
				Score		Intensity
165	165.1	1	1	2.81	3	69400	33381	10.02	CAEEL	Q21809
#	Filename	z	Score	Spectrum	Variable	Sequence	Sequence Map	MH+	MH+	MH+
				Intensity	Sites			Matched	Mass Shift	Error
								(Da)	(Da)	(ppm)
1	ECOLIOP5048HC.8376.8376.2	2	2.81	69400		(R)TRLALDVKK(D)	(R)T\R L A\L D V K/K(D)	1043.66	0.0087	8.3
Group	Subgroup	Spectra	Distinct	Distinct	% AA	Total	Protein MW	Protein	Species	Database	Protein Name
(#)	(#)	(#)	Peptides	Summed	Coverage	Protein	(Da)	pI		Accession #
			(#)	MS/MS Search		Spectral
				Score		Intensity
166	166.1	1	1	2.74	1.6	85200	49832.6	6.63	CAEEL	G5EBS1
#	Filename	z	Score	Spectrum	Variable	Sequence	Sequence Map	MH+	MH+	MH+
				Intensity	Sites			Matched	Mass Shift	Error
								(Da)	(Da)	(ppm)
1	ECOLIOP5048HB.8915.8915.2	2	2.74	85200	M248m	(K)mIKLGLK(N)	(K)m I|K L G L/K(N)	802.522	15.9998	6
Group	Subgroup	Spectra	Distinct	Distinct	% AA	Total	Protein MW	Protein	Species	Database	Protein Name
(#)	(#)	(#)	Peptides	Summed	Coverage	Protein	(Da)	pI		Accession #
			(#)	MS/MS Search		Spectral
				Score		Intensity
167	167.1	1	1	2.71	3.5	4800	45789.7	9.67	CAEEL	D0Z5N1
#	Filename	z	Score	Spectrum	Variable	Sequence	Sequence Map	MH+	MH+	MH+
				Intensity	Sites			Matched	Mass Shift	Error
								(Da)	(Da)	(ppm)
1	ECOLIOP5048HC.3923.3923.3	3	2.71	4800	M355m	(R)mGGGPLHGEDESNRK(R)	(R)m G G G P L/H G E/D/E S N R K(R)	1583.72	15.9958	0.5
Group	Subgroup	Spectra	Distinct	Distinct	% AA	Total	Protein MW	Protein	Species	Database	Protein Name
(#)	(#)	(#)	Peptides	Summed	Coverage	Protein	(Da)	pI		Accession #
			(#)	MS/MS Search		Spectral
				Score		Intensity
168	168.1	1	1	2.71	6.7	60900	13381.4	9.89	CAEEL	Q18786
#	Filename	z	Score	Spectrum	Variable	Sequence	Sequence Map	MH+	MH+	MH+
				Intensity	Sites			Matched	Mass Shift	Error
								(Da)	(Da)	(ppm)
1	ECOLIOP5048HA.2333.2333.2	2	2.71	60900		(K)AKSVAKDR(F)	(K)A K/S\V A/K D R(F)	874.51	-0.0138	-15.8
Group	Subgroup	Spectra	Distinct	Distinct	% AA	Total	Protein MW	Protein	Species	Database	Protein Name
(#)	(#)	(#)	Peptides	Summed	Coverage	Protein	(Da)	pI		Accession #
			(#)	MS/MS Search		Spectral
				Score		Intensity
169	169.1	1	1	2.51	3.4	17200	32102.7	6.84	CAEEL	Q20742
#	Filename	z	Score	Spectrum	Variable	Sequence	Sequence Map	MH+	MH+	MH+
				Intensity	Sites			Matched	Mass Shift	Error
								(Da)	(Da)	(ppm)
1	ECOLIOP5048HA.4404.4404.2	2	2.51	17200		(R)NNHATENCLK(F)	(R)N N/H A T E/N C L/K(F)	1200.54	0.0082	6.8
Group	Subgroup	Spectra	Distinct	Distinct	% AA	Total	Protein MW	Protein	Species	Database	Protein Name
(#)	(#)	(#)	Peptides	Summed	Coverage	Protein	(Da)	pI		Accession #
			(#)	MS/MS Search		Spectral
				Score		Intensity
170	170.1	1	1	2.32	1.3	4120	60263.7	6.65	CAEEL	O02317
#	Filename	z	Score	Spectrum	Variable	Sequence	Sequence Map	MH+	MH+	MH+
				Intensity	Sites			Matched	Mass Shift	Error
								(Da)	(Da)	(ppm)
1	ECOLIOP5048HB.3391.3391.2	2	2.32	4120		(K)HNNTPER(Y)	(K)H N N T|P E R(Y)	867.407	0.0113	13
Group	Subgroup	Spectra	Distinct	Distinct	% AA	Total	Protein MW	Protein	Species	Database	Protein Name
(#)	(#)	(#)	Peptides	Summed	Coverage	Protein	(Da)	pI		Accession #
			(#)	MS/MS Search		Spectral
				Score		Intensity
171	171.1	1	1	1.89	8.3	48700	17905.7	4.89	CAEEL	Q22790
#	Filename	z	Score	Spectrum	Variable	Sequence	Sequence Map	MH+	MH+	MH+
				Intensity	Sites			Matched	Mass Shift	Error
								(Da)	(Da)	(ppm)
1	ECOLIOP5048HA.4315.4354.2	2	1.89	48700		(R)AGDSAAADEEEKK(K)	(R)A G\D S A A A D E/E E K/K(K)	1320.59	-0.0173	-13.1
Group	Subgroup	Spectra	Distinct	Distinct	% AA	Total	Protein MW	Protein	Species	Database	Protein Name
(#)	(#)	(#)	Peptides	Summed	Coverage	Protein	(Da)	pI		Accession #
			(#)	MS/MS Search		Spectral
				Score		Intensity
172	172.1	1	1	1.69	15.9	65300	10996.7	10.08	CAEEL	Q95QP9
#	Filename	z	Score	Spectrum	Variable	Sequence	Sequence Map	MH+	MH+	MH+
				Intensity	Sites			Matched	Mass Shift	Error
								(Da)	(Da)	(ppm)
1	ECOLIOP5048HB.5174.5174.2	2	1.69	65300	M1m M7m	(-)mQWFCTmLLRTDFGRR(A)	(-)m Q W F C T m L L R T D/F G/R R(A)	2118.02	31.9957	2.7
Group	Subgroup	Spectra	Distinct	Distinct	% AA	Total	Protein MW	Protein	Species	Database	Protein Name
(#)	(#)	(#)	Peptides	Summed	Coverage	Protein	(Da)	pI		Accession #
			(#)	MS/MS Search		Spectral
				Score		Intensity
173	173.1	1	1	1.29	3.2	11700	45784.2	6.32	CAEEL	Q9XTV3
#	Filename	z	Score	Spectrum	Variable	Sequence	Sequence Map	MH+	MH+	MH+
				Intensity	Sites			Matched	Mass Shift	Error
								(Da)	(Da)	(ppm)
1	ECOLIOP5048HA.3912.3912.3	3	1.29	11700	M9m M13m	(R)RmSSKmVADNLCR(Q)	(R)R m S S/K/m V\A D/N L C R(Q)	1567.75	31.9695	-12.7
Group	Subgroup	Spectra	Distinct	Distinct	% AA	Total	Protein MW	Protein	Species	Database	Protein Name
(#)	(#)	(#)	Peptides	Summed	Coverage	Protein	(Da)	pI		Accession #
			(#)	MS/MS Search		Spectral
				Score		Intensity
174	174.1	1	1	0.85	0.6	7310	178085	5.42	CAEEL	H2KZG3
#	Filename	z	Score	Spectrum	Variable	Sequence	Sequence Map	MH+	MH+	MH+
				Intensity	Sites			Matched	Mass Shift	Error
								(Da)	(Da)	(ppm)
1	ECOLIOP5048HB.2505.2505.2	2	0.85	7310		(K)LDNDMSNYSK(E)	(K)L D N\D M S\N/Y S K(E)	1186.51	-0.0017	-1.5

## Sheet: Protein-Protein Comparision
Spectrum Mill - Protein Peptide/Summary
Results Shown Filtered by Validation Category: sequence-not-validated
Data Directory: msdataSM\ECOLIOP5048HA - SpecFeatures read
Retrieving all hits from tagSummary file.
all hits read from tagSummary file num hits: 139
original hits subset determined from files: 76 Files: 76 Hits: 138
Data Directory: msdataSM\ECOLIOP5048HB - SpecFeatures read
Retrieving all hits from tagSummary file.
all hits read from tagSummary file num hits: 142
original hits subset determined from files: 82 Files: 82 Hits: 139
Data Directory: msdataSM\ECOLIOP5048HC - SpecFeatures read
Retrieving all hits from tagSummary file.
all hits read from tagSummary file num hits: 124
original hits subset determined from files: 75 Files: 75 Hits: 121
beginning to assemble proteins .... proteins assembled 0.017201 sec
proteins filtered by distinct peptides 0.004165 sec
proteins filtered by score
calculated protein coverage maps 0.085713 sec
beginning to roll up 280 proteins into groups ...
Sorted peptides by length to accelerate peptide roll up 0.006326 sec
completed primary peptide roll up 2702 sequence comparisons 0.047727 sec
completed post roll up subgrouping and sorting 0.003653 sec
Finished protein roll up into 174 groups 0.058728 sec
protein groups ready for display
proteinGroupingMethod: oneSharedPeptideSubgrouped Subgroups expanded 6.84e-002 sec
total intensity: sum of intensity for all spectra of peptides belonging to protein
ECOLIOP5048HA	ECOLIOP5048HB	ECOLIOP5048HC	Columns	Spectra	Protein MW	Protein	Species	# Rank 1	# Shared	# Shared	Shared	# Distinct	# Distinct	Distinct	# Distinct	Database	%AA	Distinct	Distinct	Group	Subgroup	Protein Name
# spectra	# spectra	# spectra	Protein	Protein	(Da)	pI		Species Present	Peptides	Spectra	Total	Peptides	Spectra	Total	Peptides Species 2	Accession #	Coverage	Peptides	Summed	#	#
total intensity	total intensity	total intensity	Observed	Observed							Intensity	Species 1	Species 1	Intensity				(#CI)	MS/MS Search
			(#)	(#)										Species 1					Score
2	1	2	3	5	42157.4	5.44	CAEEL	1			0	3	5	27700	0	O45815	5	3	21.09	1	1.1
12900	6130	8650
2	1	1	3	4	53610.1	6.17	CAEEL	1			0	1	4	1550000	0	Q09400	1.2	1	14.2	2	2.1
791000	385000	369000
2	2	1	3	5	63688.4	5.62	CAEEL	1			0	1	5	554000	0	Q9N4P3	1	1	13.89	3	3.1
223000	222000	109000
2	1	0	2	3	40860	5.86	CAEEL	1			0	1	3	507000	0	Q17930	5.4	1	13.26	4	4.1
270000	238000	0
2	1	0	2	3	31791.1	9.38	CAEEL	1			0	1	3	442000	0	G5EFI9	3.2	1	12.46	5	5.1
315000	127000	0
0	1	0	1	1	107910	6.63	CAEEL	1			0	1	1	127000	0	H2L2D1	0.9	1	11.86	6	6.1
0	127000	0
0	1	0	1	1	164186	5.9	CAEEL	1			0	1	1	42300	0	P90757	0.6	1	11.76	7	7.1
0	42300	0
2	0	1	2	3	54245.5	8.35	CAEEL	1			0	2	3	284000	0	Q27512	5.4	2	11.45	8	8.1
226000	0	57300
2	0	0	1	2	109608	4.37	CAEEL	1			0	1	2	315000	0	Q09560	0.9	1	11.19	9	9.1
315000	0	0
0	0	2	1	2	46457.4	9.96	CAEEL	1			0	1	2	305000	0	B3WFV2	1.9	1	11.09	10	10.1
0	0	305000
2	0	1	2	3	74997.9	8.26	CAEEL	1			0	1	3	213000	0	O62139	2.7	1	10.97	11	11.1
137000	0	76600
0	1	0	1	1	72907.1	9.5	CAEEL	1			0	1	1	38500	0	Q9XXN2	3.3	1	10.65	12	12.1
0	38500	0
1	0	0	1	1	31842.5	9.48	CAEEL	1			0	1	1	1130	0	Q93438	2.9	1	10.06	13	13.1
1130	0	0
0	0	1	1	1	51197.2	6.06	CAEEL	1			0	1	1	1930	0	Q9U2K7	2.9	1	10.02	14	14.1
0	0	1930
1	1	1	3	3	61967	9.57	CAEEL	1			0	1	3	155000	0	Q95Y89	4.3	1	9.92	15	15.1
50600	51600	53000
0	1	0	1	1	16299	5.52	CAEEL	1			0	1	1	406000	0	P02513	5.5	1	9.75	16	16.1
0	406000	0
0	1	0	1	1	68040.6	8.71	CAEEL	1			0	1	1	42300	0	Q21406	1.4	1	9.38	17	17.1
0	42300	0
1	0	0	1	1	122816	6.79	CAEEL	1			0	1	1	7020	0	E7EAU8	2.1	1	9.35	18	18.1
7020	0	0
1	1	1	3	3	55695.2	11.42	CAEEL	1			0	1	3	1060000	0	Q09633	1.5	1	9.28	19	19.1
343000	406000	309000
0	1	0	1	1	26738.2	8.71	CAEEL	1			0	1	1	82000	0	P90779	4.8	1	9.12	20	20.1
0	82000	0
0	0	1	1	1	73829.8	10.03	CAEEL	1			0	1	1	12700	0	G5ED64	3	1	9.03	21	21.1
0	0	12700
2	1	0	2	3	26312.5	9.74	CAEEL	1			0	1	3	358000	0	A0A0K3AWR5	3.6	1	8.92	22	22.1
222000	136000	0
1	2	0	2	3	461741	5.2	CAEEL	1			0	1	3	24500	0	H2L075	0.1	1	8.82	23	23.1
7950	16600	0
0	1	0	1	1	56832.6	4.88	CAEEL	1			0	1	1	3840	0	Q18377	1.2	1	8.78	24	24.1
0	3840	0
1	0	2	2	3	11421.3	10.29	CAEEL	1			0	1	3	255000	0	Q9U374	9.4	1	8.78	25	25.1
53900	0	202000
0	0	1	1	1	68832.6	5.78	CAEEL	1			0	1	1	9110	0	Q19266	2.8	1	8.57	26	26.1
0	0	9110
0	0	1	1	1	262699	7.01	CAEEL	1			0	1	1	3590	0	A0A1D3PCL8	0.4	1	8.56	27	27.1
0	0	3590
0	0	1	1	1	22641.4	9.43	CAEEL	1			0	1	1	7940	0	Q19022	2.9	1	8.55	28	28.1
0	0	7940
0	1	0	1	1	42601.6	6.06	CAEEL	1			0	1	1	16700	0	O45518	5.6	1	8.54	29	29.1
0	16700	0
0	0	1	1	1	29126.7	6.24	CAEEL	1			0	1	1	79500	0	Q19812	2.8	1	8.41	30	30.1
0	0	79500
0	1	0	1	1	52854	6.12	CAEEL	1			0	1	1	14300	0	Q18453	5.1	1	8.4	31	31.1
0	14300	0
0	1	0	1	1	32727.4	9.31	CAEEL	1			0	1	1	244000	0	G5ECX9	3.9	1	8.33	32	32.1
0	244000	0
1	0	0	1	1	23805.9	10.02	CAEEL	1			0	1	1	6090	0	Q22415	6.3	1	8.3	33	33.1
6090	0	0
0	0	1	1	1	37723.7	5.26	CAEEL	1			0	1	1	2680	0	G3MU65	3.5	1	8.13	34	34.1
0	0	2680
0	0	1	1	1	114011	9.2	CAEEL	1			0	1	1	63000	0	Q9U3H5	1.9	1	8.09	35	35.1
0	0	63000
0	1	0	1	1	40988.3	8.62	CAEEL	1			0	1	1	8910	0	O17609	4.8	1	7.98	36	36.1
0	8910	0
0	0	1	1	1	17221.4	10.08	CAEEL	1			0	1	1	8220	0	Q9BKQ9	11.5	1	7.96	37	37.1
0	0	8220
1	0	0	1	1	40814	9.22	CAEEL	1			0	1	1	1210	0	B3GWD2	4.1	1	7.92	38	38.1
1210	0	0
1	0	0	1	1	206849	5.42	CAEEL	1			0	1	1	36300	0	Q22516	1	1	7.82	39	39.1
36300	0	0
0	1	0	1	1	31638.6	11.14	CAEEL	1			0	1	1	91700	0	P18832	1.8	1	7.76	40	40.1
0	91700	0
0	1	1	2	2	16559.7	9.57	CAEEL	1			0	1	2	475000	0	Q4W4Z8	12.7	1	7.62	41	41.1
0	238000	237000
0	0	1	1	1	18651.3	9.52	CAEEL	1			0	1	1	38600	0	P34361	6.9	1	7.6	42	42.1
0	0	38600
0	0	1	1	1	63364.7	9.01	CAEEL	1			0	1	1	906	0	P34424	1.9	1	7.6	43	43.1
0	0	906
0	0	1	1	1	171677	5.95	CAEEL	1			0	1	1	53000	0	G5ED98	1.5	1	7.49	44	44.1
0	0	53000
1	0	0	1	1	71504.2	8.61	CAEEL	1			0	1	1	8710	0	Q17492	3.3	1	7.49	45	45.1
8710	0	0
0	0	1	1	1	60171.4	9.56	CAEEL	1			0	1	1	60500	0	Q20720	2.2	1	7.42	46	46.1
0	0	60500
0	1	0	1	1	49383.2	5.14	CAEEL	1			0	1	1	56600	0	D1YSH6	1.8	1	7.37	47	47.1
0	56600	0
1	1	0	2	2	74303.1	9.33	CAEEL	1			0	1	2	95300	0	Q9TYV5	1.8	1	7.35	48	48.1
48700	46600	0
1	0	0	1	1	50156.3	5.86	CAEEL	1			0	1	1	33400	0	P34475	5.1	1	7.34	49	49.1
33400	0	0
0	0	1	1	1	59173.1	7.93	CAEEL	1			0	1	1	4110	0	G5EDC7	1.3	1	7.3	50	50.1
0	0	4110
0	1	1	2	2	46529.3	8.77	CAEEL	1			0	1	2	148000	0	Q19683	4.6	1	7.3	51	51.1
0	71500	76600
1	0	1	2	2	61557.2	7.79	CAEEL	1			0	1	2	69400	0	O17828	3.9	1	7.27	52	52.1
34200	0	35300
1	3	0	2	4	55502.8	6.31	CAEEL	1			0	1	4	536000	0	Q09989	1.6	1	7.23	53	53.1
113000	422000	0
0	0	1	1	1	32029.6	9.61	CAEEL	1			0	1	1	369000	0	O62347	2	1	7.05	54	54.1
0	0	369000
2	0	0	1	2	13532.4	6.64	CAEEL	1			0	1	4	63900	0	Q09506	15.3	1	7.04	55	55.1
128000	0	0
0	0	1	1	1	95039.4	9.07	CAEEL	1			0	1	1	10300	0	Q23141	1.1	1	6.98	56	56.1
0	0	10300
0	0	1	1	1	76870	9.76	CAEEL	1			0	1	1	6800	0	B5BM46	3.6	1	6.92	57	57.1
0	0	6800
0	0	1	1	1	110225	6.39	CAEEL	1			0	1	1	1300	0	Q18298	1.4	1	6.87	58	58.1
0	0	1300
0	0	1	1	1	58156.4	6.8	CAEEL	1			0	1	1	6260	0	P41990	3.1	1	6.8	59	59.1
0	0	6260
1	1	0	2	2	101156	9.35	CAEEL	1			0	1	2	28900	0	G5EC69	2.4	1	6.74	60	60.1
28000	963	0
0	2	0	1	2	287294	6.36	CAEEL	1			0	1	2	169000	0	A0A061AJK8	0.2	1	6.73	61	61.1
0	169000	0
1	0	0	1	1	95989.7	5.29	CAEEL	1			0	1	1	11300	0	A0A163UTE6	1.6	1	6.68	62	62.1
11300	0	0
0	0	1	1	1	27025.1	9.81	CAEEL	1			0	1	1	5070	0	G3MU69	2.8	1	6.66	63	63.1
0	0	5070
0	0	1	1	1	40667.8	7.83	CAEEL	1			0	1	1	153000	0	O62116	2.5	1	6.59	64	64.1
0	0	153000
0	1	0	1	1	37267.8	9.47	CAEEL	1			0	1	1	7060	0	Q9N5I2	1.9	1	6.59	65	65.1
0	7060	0
0	1	0	1	1	56788.2	9.65	CAEEL	1			0	1	1	1010	0	Q10048	2.3	1	6.54	66	66.1
0	1010	0
0	1	0	1	1	20449.7	5.27	CAEEL	1			0	1	1	22900	0	Q18567	7.1	1	6.46	67	67.1
0	22900	0
0	1	1	2	2	37959.1	9.98	CAEEL	1			0	1	2	196000	0	F5GU62	2.1	1	6.4	68	68.1
0	143000	52500
1	0	0	1	1	31152.8	9.58	CAEEL	1			0	1	1	71700	0	Q18611	4	1	6.39	69	69.1
71700	0	0
0	1	0	1	1	41540.5	7	CAEEL	1			0	1	1	16300	0	Q19958	1.6	1	6.29	70	70.1
0	16300	0
0	1	0	1	1	29968.3	5.46	CAEEL	1			0	1	1	8870	0	Q9N352	8.9	1	6.29	71	71.1
0	8870	0
0	0	1	1	1	71888.4	5.87	CAEEL	1			0	1	1	4240	0	P38433	2	1	6.27	72	72.1
0	0	4240
0	1	0	1	1	114475	6.15	CAEEL	1			0	1	1	79400	0	G5EFX2	0.7	1	6.17	73	73.1
0	79400	0
0	0	1	1	1	11357	10.22	CAEEL	1			0	1	1	110000	0	Q9BLC2	7.5	1	6.17	74	74.1
0	0	110000
0	0	1	1	1	77784.7	6.02	CAEEL	1			0	1	1	5070	0	A0A2C9C2E8	0.8	1	6.16	75	75.1
0	0	5070
0	1	0	1	1	182483	6.12	CAEEL	1			0	1	1	22900	0	A0A061AKU0	0.9	1	6.13	76	76.1
0	22900	0
0	1	0	1	1	46506.9	9.74	CAEEL	1			0	1	1	6130	0	O16663	1.5	1	6.08	77	77.1
0	6130	0
1	0	0	1	1	39028.5	9.33	CAEEL	1			0	1	1	5730	0	O44544	2.3	1	6.08	78	78.1
5730	0	0
1	0	0	1	1	135624	9.77	CAEEL	1			0	1	1	29000	0	H2KYL8	0.5	1	6.03	79	79.1
29000	0	0
0	1	0	1	1	47543.9	9.37	CAEEL	1			0	1	1	4090	0	G8JY74	2.5	1	6.01	80	80.1
0	4090	0
0	2	0	1	2	25878.7	4.71	CAEEL	1			0	1	2	184000	0	Q21069	6.1	1	6	81	81.1
0	184000	0
0	1	0	1	1	108764	5.4	CAEEL	1			0	1	1	6280	0	Q19753	2	1	5.98	82	82.1
0	6280	0
2	0	1	2	3	51746.1	6.51	CAEEL	1			0	1	3	175000	0	Q9TZE1	1.7	1	5.91	83	83.1
122000	0	52800
1	0	0	1	1	37173.8	6.22	CAEEL	1			0	1	1	804	0	O45329	3.5	1	5.88	84	84.1
804	0	0
0	0	1	1	1	15216.1	9.15	CAEEL	1			0	1	1	78700	0	I2HA82	9.7	1	5.82	85	85.1
0	0	78700
1	0	0	1	1	68439.8	5.49	CAEEL	1			0	1	1	3800	0	Q95QN6	1	1	5.81	86	86.1
3800	0	0
1	1	0	2	2	136062	9.56	CAEEL	1			0	1	2	11300	0	Q23260	1.1	1	5.79	87	87.1
7950	3370	0
0	0	1	1	1	31429.1	9.32	CAEEL	1			0	1	1	16300	0	A0A061AIZ0	4.8	1	5.78	88	88.1
0	0	16300
1	0	0	1	1	20816.7	6.16	CAEEL	1			0	1	1	21500	0	A0A0K3ARZ8	7.7	1	5.7	89	89.1
21500	0	0
1	0	0	1	1	16958.3	6.12	CAEEL	1			0	1	1	712	0	Q95XX0	5.9	1	5.69	90	90.1
712	0	0
0	0	1	1	1	164445	7.19	CAEEL	1			0	1	1	99500	0	G5EDU3	0.4	1	5.59	91	91.1
0	0	99500
0	0	1	1	1	74226.9	5.98	CAEEL	1			0	1	1	76600	0	P34672	3	1	5.56	92	92.1
0	0	76600
0	0	1	1	1	117809	6.43	CAEEL	1			0	1	1	10900	0	O76571	0.5	1	5.5	93	93.1
0	0	10900
1	0	0	1	1	80126.6	8.61	CAEEL	1			0	1	1	54100	0	Q18563	2.1	1	5.48	94	94.1
54100	0	0
1	0	0	1	1	87766.2	9.17	CAEEL	1			0	1	1	112000	0	B7FAS5	0.9	1	5.44	95	95.1
112000	0	0
1	0	0	1	1	50319.4	6.33	CAEEL	1			0	1	1	2430	0	O45870	1.8	1	5.29	96	96.1
2430	0	0
0	0	1	1	1	102802	7.73	CAEEL	1			0	1	1	23600	0	A0A078BS72	2.1	1	5.24	97	97.1
0	0	23600
0	0	1	1	1	118713	5.87	CAEEL	1			0	1	1	5540	0	Q17657	0.8	1	5.23	98	98.1
0	0	5540
0	1	2	2	3	46776.7	7.82	CAEEL	1			0	1	3	189000	0	H2L0B0	4.5	1	5.22	99	99.1
0	63200	126000
1	0	0	1	1	27268.8	5.15	CAEEL	1			0	1	1	4360	0	G5EEN8	5.9	1	5.2	100	100.1
4360	0	0
0	0	1	1	1	30089.2	7.88	CAEEL	1			0	1	1	22000	0	Q20091	4.6	1	5.2	101	101.1
0	0	22000
0	1	0	1	1	61727.4	5.62	CAEEL	1			0	1	1	15200	0	G1K0V0	2.6	1	5.17	102	102.1
0	15200	0
1	0	1	2	2	19593.1	9.56	CAEEL	1			0	1	3	22300	0	Q19165	8.2	1	5.16	103	103.1
9100	0	13200
1	0	1	2	2	148181	5.99	CAEEL	1			0	1	2	8870	0	Q95XJ2	0.4	1	5.15	104	104.1
3800	0	5070
0	1	0	1	1	201923	5.8	CAEEL	1			0	1	1	22900	0	Q18983	0.7	1	5.13	105	105.1
0	22900	0
1	0	0	1	1	460350	5.95	CAEEL	1			0	1	1	17200	0	G5EBH3	0.2	1	5.12	106	106.1
17200	0	0
0	0	1	1	1	40441.2	7.88	CAEEL	1			0	1	1	15000	0	Q9XXS2	2.9	1	5	107	107.1
0	0	15000
1	0	0	1	1	140947	5.55	CAEEL	1			0	1	1	1930	0	D7SFM3	1.3	1	4.99	108	108.1
1930	0	0
0	1	0	1	1	13500.4	10.4	CAEEL	1			0	1	1	1410	0	P04255	7.3	1	4.99	109	109.1
0	1410	0
1	0	0	1	1	24317.5	11.32	CAEEL	1			0	1	1	2560	0	Q17561	4	1	4.92	110	110.1
2560	0	0
1	1	0	2	2	94171.3	6.19	CAEEL	1			0	1	2	127000	0	O17744	2.4	1	4.87	111	111.1
63900	63200	0
1	0	0	1	1	105064	8.55	CAEEL	1			0	1	1	49000	0	H2L080	0.9	1	4.84	112	112.1
49000	0	0
0	0	1	1	1	29003.3	9.04	CAEEL	1			0	1	1	3770	0	Q9N5U6	3.6	1	4.83	113	113.1
0	0	3770
1	0	0	1	1	40568.8	5.62	CAEEL	1			0	1	1	21500	0	Q11123	3.8	1	4.78	114	114.1
21500	0	0
1	0	0	1	1	18673.9	5.06	CAEEL	1			0	1	1	3700	0	P19625	7	1	4.66	115	115.1
3700	0	0
0	0	1	1	1	21768.3	10.25	CAEEL	1			0	1	1	8090	0	Q965N5	4.8	1	4.66	116	116.1
0	0	8090
0	1	0	1	1	48788.4	8.39	CAEEL	1			0	1	1	6900	0	O01755	1.6	1	4.65	117	117.1
0	6900	0
0	0	1	1	1	23470.7	10.24	CAEEL	1			0	1	1	57300	0	P49391	9.5	1	4.64	118	118.1
0	0	57300
0	1	0	1	1	54919.2	7.81	CAEEL	1			0	1	1	1310	0	G5ECM6	2.6	1	4.58	119	119.1
0	1310	0
1	0	0	1	1	27644.7	9.14	CAEEL	1			0	1	1	7630	0	O02121	3.7	1	4.53	120	120.1
7630	0	0
0	1	0	1	1	60864.8	9.02	CAEEL	1			0	1	1	9810	0	Q9N4H0	2.6	1	4.48	121	121.1
0	9810	0
0	0	1	1	1	100673	5.4	CAEEL	1			0	1	1	78700	0	O17944	1.6	1	4.42	122	122.1
0	0	78700
0	1	0	1	1	38618.7	9.65	CAEEL	1			0	1	1	58600	0	P91475	2.7	1	4.35	123	123.1
0	58600	0
0	0	1	1	1	11789	8.96	CAEEL	1			0	1	1	14400	0	Q21377	5.6	1	4.35	124	124.1
0	0	14400
0	1	0	1	1	65135.7	5.98	CAEEL	1			0	1	1	6720	0	Q21234	3.7	1	4.34	125	125.1
0	6720	0
1	0	0	1	1	34485.1	9.69	CAEEL	1			0	1	2	0	0	A0A3P6MY32	6.2	1	4.28	126	126.1
17900	0	0
0	1	0	1	1	152982	9.52	CAEEL	1			0	1	1	34300	0	O17582	1.6	1	4.25	127	127.1
0	34300	0
0	0	1	1	1	62277	6.23	CAEEL	1			0	1	1	153000	0	Q8IG67	1.4	1	4.17	128	128.1
0	0	153000
0	1	0	1	1	20298.5	9.12	CAEEL	1			0	1	1	2700	0	Q22966	3.4	1	4.14	129	129.1
0	2700	0
0	1	0	1	1	13288.8	5.65	CAEEL	1			0	1	1	9250	0	Q52GX5	8.4	1	4.13	130	130.1
0	9250	0
0	0	1	1	1	198195	5.14	CAEEL	1			0	1	1	18400	0	Q19350	0.5	1	4.11	131	131.1
0	0	18400
0	1	0	1	1	58787.5	7	CAEEL	1			0	1	1	3840	0	G5EDP9	1.1	1	4.05	132	132.1
0	3840	0
0	1	0	1	1	101652	7.55	CAEEL	1			0	1	1	10900	0	Q20733	2.3	1	4.01	133	133.1
0	10900	0
0	0	1	1	1	51559.4	8.28	CAEEL	1			0	1	1	19300	0	B3WFV4	2.1	1	3.96	134	134.1
0	0	19300
1	0	0	1	1	42720.2	6.44	CAEEL	1			0	1	1	13000	0	O62034	3.5	1	3.95	135	135.1
13000	0	0
0	1	0	1	1	33173.1	6.55	CAEEL	1			0	1	1	38000	0	G5EBH4	4.6	1	3.89	136	136.1
0	38000	0
0	1	0	1	1	62597.1	9.8	CAEEL	1			0	1	1	216000	0	P91122	1.4	1	3.89	137	137.1
0	216000	0
0	0	1	1	1	54636.5	5.1	CAEEL	1			0	1	1	51000	0	O18195	2.6	1	3.87	138	138.1
0	0	51000
0	0	1	1	1	19178.7	4.92	CAEEL	1			0	1	1	3290	0	P91833	8.8	1	3.85	139	139.1
0	0	3290
0	1	0	1	1	50682.4	8.6	CAEEL	1			0	1	1	111000	0	D6VPA0	1.3	1	3.8	140	140.1
0	111000	0
0	1	0	1	1	80786.5	9.7	CAEEL	1			0	1	1	4590	0	H2L031	2	1	3.7	141	141.1
0	4590	0
0	1	0	1	1	29277.8	9.15	CAEEL	1			0	1	1	2950	0	Q9N4C7	4.7	1	3.68	142	142.1
0	2950	0
0	1	0	1	1	25026.5	9.75	CAEEL	1			0	1	1	5190	0	Q4TTD0	7.4	1	3.67	143	143.1
0	5190	0
0	1	0	1	1	203241	8.93	CAEEL	1			0	1	1	1340	0	H2KYA5	0.6	1	3.66	144	144.1
0	1340	0
0	1	0	1	1	23074.6	9.51	CAEEL	1			0	1	1	14400	0	D2YW13	6.7	1	3.65	145	145.1
0	14400	0
0	0	1	1	1	10245	10.3	CAEEL	1			0	1	1	689	0	A0A2C9C3B3	14.8	1	3.6	146	146.1
0	0	689
1	0	0	1	1	41806.6	8.45	CAEEL	1			0	1	1	54100	0	O62112	3.5	1	3.59	147	147.1
54100	0	0
0	1	0	1	1	50918.3	6.26	CAEEL	1			0	1	1	63200	0	G5ECB6	4.3	1	3.58	148	148.1
0	63200	0
0	1	0	1	1	52312.3	5.84	CAEEL	1			0	1	1	16800	0	Q18924	3.3	1	3.56	149	149.1
0	16800	0
1	0	0	1	1	5493.6	11.64	CAEEL	1			0	1	1	4170	0	E0AHA5	27.2	1	3.44	150	150.1
4170	0	0
0	0	1	1	1	28425.9	4.73	CAEEL	1			0	1	1	51000	0	Q966F4	5	1	3.44	151	151.1
0	0	51000
1	0	0	1	1	26091.1	5.38	CAEEL	1			0	1	1	11700	0	A0A168H4I0	6	1	3.39	152	152.1
11700	0	0
0	0	1	1	1	48315.8	5.31	CAEEL	1			0	1	1	7500	0	G5EF21	1.3	1	3.35	153	153.1
0	0	7500
0	0	1	1	1	113173	5.46	CAEEL	1			0	1	1	15100	0	Q21776	1.7	1	3.31	154	154.1
0	0	15100
0	0	1	1	1	32364.4	8.46	CAEEL	1			0	1	1	78700	0	Q9XUF2	5	1	3.3	155	155.1
0	0	78700
0	1	0	1	1	30976.8	5.31	CAEEL	1			0	1	1	3370	0	P91061	5.1	1	3.26	156	156.1
0	3370	0
0	0	1	1	1	17025.6	6.12	CAEEL	1			0	1	1	5540	0	V6CLD0	7.5	1	3.18	157	157.1
0	0	5540
1	0	0	1	1	88281.5	6.02	CAEEL	1			0	1	1	2720	0	H2L0L1	1.4	1	3.17	158	158.1
2720	0	0
1	0	0	1	1	30599	5.68	CAEEL	1			0	1	1	8470	0	Q9TZB8	3.8	1	3.15	159	159.1
8470	0	0
0	1	0	1	1	44898.6	5.55	CAEEL	1			0	1	1	3840	0	Q18535	1.4	1	3.13	160	160.1
0	3840	0
1	0	0	1	1	48437.3	4.33	CAEEL	1			0	1	1	22300	0	Q8WQC5	2.4	1	3.08	161	161.1
22300	0	0
1	1	0	2	2	84914.4	9.61	CAEEL	1			0	1	2	3990	0	O01497	0.7	1	3.04	162	162.1
2220	1770	0
1	0	0	1	1	245538	5.84	CAEEL	1			0	1	1	31600	0	Q9U2G0	1.1	1	3	163	163.1
31600	0	0
1	0	0	1	1	55374.1	6.87	CAEEL	1			0	1	1	3300	0	A0A131MB05	2.6	1	2.98	164	164.1
3300	0	0
0	0	1	1	1	33381	10.02	CAEEL	1			0	1	1	69400	0	Q21809	3	1	2.81	165	165.1
0	0	69400
0	1	0	1	1	49832.6	6.63	CAEEL	1			0	1	1	85200	0	G5EBS1	1.6	1	2.74	166	166.1
0	85200	0
0	0	1	1	1	45789.7	9.67	CAEEL	1			0	1	1	4800	0	D0Z5N1	3.5	1	2.71	167	167.1
0	0	4800
1	0	0	1	1	13381.4	9.89	CAEEL	1			0	1	1	60900	0	Q18786	6.7	1	2.71	168	168.1
60900	0	0
1	0	0	1	1	32102.7	6.84	CAEEL	1			0	1	1	17200	0	Q20742	3.4	1	2.51	169	169.1
17200	0	0
0	1	0	1	1	60263.7	6.65	CAEEL	1			0	1	1	4120	0	O02317	1.3	1	2.32	170	170.1
0	4120	0
1	0	0	1	1	17905.7	4.89	CAEEL	1			0	1	1	48700	0	Q22790	8.3	1	1.89	171	171.1
48700	0	0
0	1	0	1	1	10996.7	10.08	CAEEL	1			0	1	1	65300	0	Q95QP9	15.9	1	1.69	172	172.1
0	65300	0
1	0	0	1	1	45784.2	6.32	CAEEL	1			0	1	1	11700	0	Q9XTV3	3.2	1	1.29	173	173.1
11700	0	0
0	1	0	1	1	178085	5.42	CAEEL	1			0	1	1	7310	0	H2KZG3	0.6	1	0.85	174	174.1
0	7310	0
