# Supplementary material for: Cronobacter sakazakii infection implicates multifaceted neuro-immune regulatory pathways of Caenorhabditis elegans
Source: Royal Society of Chemistry journal article supplement (doi:10.1039/d3mo00167a), 2023-09-28
Supplement: d3mo00167a5.xlsx [file d3mo00167a5.xlsx]

## Sheet: Protein Summary Details
Spectrum Mill - Protein Peptide/Summary
Results Shown Filtered by Validation Category: sequence-not-validated
Data Directory: msdataSM\CSAKAZAKII48HA - SpecFeatures read
Retrieving all hits from tagSummary file.
all hits read from tagSummary file num hits: 165
original hits subset determined from files: 100 Files: 100 Hits: 163
Data Directory: msdataSM\CSAKAZAKII48HB - SpecFeatures read
Retrieving all hits from tagSummary file.
all hits read from tagSummary file num hits: 175
original hits subset determined from files: 99 Files: 99 Hits: 172
Data Directory: msdataSM\CSAKAZAKII48HC - SpecFeatures read
Retrieving all hits from tagSummary file.
all hits read from tagSummary file num hits: 141
original hits subset determined from files: 101 Files: 101 Hits: 141
beginning to assemble proteins .... proteins assembled 0.015395 sec
proteins filtered by distinct peptides 0.009545 sec
proteins filtered by score
calculated protein coverage maps 0.128473 sec
beginning to roll up 361 proteins into groups ...
Sorted peptides by length to accelerate peptide roll up 0.005092 sec
completed primary peptide roll up 3837 sequence comparisons 0.06724 sec
completed post roll up subgrouping and sorting 0.004493 sec
Finished protein roll up into 228 groups 0.078185 sec
protein groups ready for display
proteinGroupingMethod: oneSharedPeptideSubgrouped Subgroups expanded 8.77e-002 sec
228 Protein Groups listed - Total Proteins: 354
Group	Subgroup	Spectra	Distinct	Distinct	% AA	Total	Protein MW	Protein	Species	Database	Protein Name
(#)	(#)	(#)	Peptides	Summed	Coverage	Protein	(Da)	pI		Accession #
			(#)	MS/MS Search		Spectral
				Score		Intensity
1	1.1	6	3	24.24	6.3	48500	42137.4	5.3	CAEEL	P0DM41	Actin-1
1	1.1	6	3	24.24	6.3	48500	42137.4	5.3	CAEEL	P0DM42	Actin-3
1	1.1	6	3	24.24	6.3	48500	42119.3	5.29	CAEEL	P10984	Actin-2
1	1.1	6	3	24.24	6.3	48500	42119.3	5.3	CAEEL	P10986	Actin-4
1	1.1	6	3	24.24	6.6	48500	40653.7	5.56	CAEEL	Q6A8K1	Actin-4
1	1.1	6	3	24.24	7.2	48500	37506.2	5.37	CAEEL	Q95ZL1	Actin-4
2	2.1	2	2	16.51	1.6	201000	87766.2	9.17	CAEEL	B7FAS5	TBC (Tre-2/Bub2/Cdc16) domain family
2	2.1	1	1	10.98	0.6	105000	113086	9.14	CAEEL	Q7K711	TBC (Tre-2/Bub2/Cdc16) domain family
2	2.1	1	1	10.98	0.6	105000	119733	9.14	CAEEL	Q9U2D8	TBC (Tre-2/Bub2/Cdc16) domain family
2	2.1	2	1	5.53	0.4	193000	164445	7.19	CAEEL	G5EDU3	Phospholipase
3	3.1	8	1	16.18	1.2	3070000	53610.1	6.17	CAEEL	Q09400	Uncharacterized protein F58F12.3
4	4.1	7	1	15.18	1	731000	63688.4	5.62	CAEEL	Q9N4P3	Uncharacterized protein
5	5.1	4	1	12.86	1.8	92100	38009.2	8.8	CAEEL	V6CLB7	G Protein, Alpha subunit
5	5.1	4	1	12.86	1.8	92100	37733.9	8.52	CAEEL	V6CLF3	G Protein, Alpha subunit
6	6.1	1	1	12.57	0.9	75700	109608	4.37	CAEEL	Q09560	Uncharacterized protein F36G3.1
7	7.1	1	1	12.14	1.7	468	118489	8.8	CAEEL	A0A0K3AV08	Mitogen-activated protein kinase kinase kinase mlk-1
8	8.1	2	1	11.89	2.9	45400	22641.4	9.43	CAEEL	Q19022	Uncharacterized protein
9	9.1	1	1	11.86	1.7	4530	59599	6.29	CAEEL	Q23487	FUBp (FUBP) Like
9	9.1	1	1	11.86	1.9	4530	54749.6	7.12	CAEEL	Q7Z145	FUBp (FUBP) Like
10	10.1	2	1	11.68	2.8	71100	47695.2	5.03	CAEEL	O61882	Uncharacterized protein
11	11.1	2	1	11.12	4.9	29400	29505.6	8.98	CAEEL	Q9N3Z0	SeQueSTosome related
12	12.1	2	2	11.05	0.6	20900	476776	5.81	CAEEL	Q19542	Cytoplasmic dynein 2 heavy chain 1
13	13.1	2	2	10.42	1.6	36000	130903	6.01	CAEEL	Q21049	Liprin-alpha
14	14.1	1	1	10.39	6.2	17100	22329.6	4.27	CAEEL	G5EFR2	Uncharacterized protein
15	15.1	2	1	10.22	3	33200	52330.5	9.59	CAEEL	G8JYE5	Uncharacterized protein
15	15.1	2	1	10.22	2.9	33200	54317.7	9.44	CAEEL	Q23525	Uncharacterized protein ZK546.14
16	16.1	2	1	10.22	8.3	9230	30985	4.73	CAEEL	Q9N522	Uncharacterized protein
17	17.1	2	1	10.19	3.2	177000	31791.1	9.38	CAEEL	G5EFI9	Checkpoint protein
18	18.1	1	1	10.11	2.5	1830	66166.3	5.93	CAEEL	Q93794	F-box/WD repeat-containing protein sel-10
19	19.1	1	1	10.1	0.4	110000	179856	5.9	CAEEL	Q9XW25	AT hook Transcription Factor family
20	20.1	1	1	9.95	2.5	75700	40667.8	7.83	CAEEL	O62116	Nuclear Hormone Receptor family
21	21.1	1	1	9.94	0.1	22800	461741	5.2	CAEEL	H2L075	KETtiN (Drosophila actin-binding) homolog
21	21.1	1	1	9.94	0.1	22800	474320	5.25	CAEEL	Q5PY59	KETtiN (Drosophila actin-binding) homolog
21	21.1	1	1	9.94	0.1	22800	469691	5.23	CAEEL	Q8MXD8	KETtiN (Drosophila actin-binding) homolog
21	21.1	1	1	9.94	0.1	22800	471245	5.32	CAEEL	Q9NL87	KETtiN (Drosophila actin-binding) homolog
21	21.1	1	1	9.94	0.1	22800	553088	5.47	CAEEL	V6CJB8	KETtiN (Drosophila actin-binding) homolog
21	21.1	1	1	9.94	0.1	22800	482938	5.27	CAEEL	V6CKH1	KETtiN (Drosophila actin-binding) homolog
21	21.1	1	1	9.94	0.1	22800	557717	5.48	CAEEL	V6CLP5	KETtiN (Drosophila actin-binding) homolog
21	21.1	1	1	9.94	0.1	22800	544469	5.45	CAEEL	V6CLT3	KETtiN (Drosophila actin-binding) homolog
21	21.1	1	1	9.94	0.1	22800	549098	5.46	CAEEL	V6CLU0	KETtiN (Drosophila actin-binding) homolog
21	21.1	1	1	9.94	0.1	22800	478309	5.26	CAEEL	V6CLU5	KETtiN (Drosophila actin-binding) homolog
22	22.1	1	1	9.9	1.3	3450	49975.6	8.92	CAEEL	Q23571	Lipoamide acyltransferase component of branched-chain alpha-keto acid dehydrogenase complex, mitochondrial
22	22.1	1	1	9.9	1.3	3450	49862.8	8.91	CAEEL	Q9XX97	Nematode Kynurenine AminoTransferase
23	23.1	1	1	9.86	4.2	7680	30135.3	9	CAEEL	Q94165	Homeobox protein ceh-34
24	24.1	1	1	9.77	0.9	97800	110510	5.89	CAEEL	Q9N3Q5	Uncharacterized protein
25	25.1	5	1	9.71	2.7	318000	74997.9	8.26	CAEEL	O62139	Acyl-coenzyme A oxidase
26	26.1	3	1	9.62	1.3	63900	87806	9.84	CAEEL	Q11188	Uncharacterized protein C05D11.9
27	27.1	2	1	9.36	2.5	5410	47543.9	9.37	CAEEL	G8JY74	Elongation factor 1-alpha
27	27.1	2	1	9.36	2.3	5410	51123.9	9.35	CAEEL	P53013	Elongation factor 1-alpha
28	28.1	4	1	9.36	1.8	141000	78385	9.23	CAEEL	Q8MNV7	SWI/SNF-related matrix-associated actin-dependent regulator of chromatin subfamily A-like protein 1 homolog
29	29.1	1	1	9.35	1.4	131000	111952	9.36	CAEEL	Q9GYL4	Uncharacterized protein
30	30.1	3	1	9.25	2.8	765000	36175.7	8.5	CAEEL	O62515	Probable phytanoyl-CoA dioxygenase
31	31.1	1	1	9	0.8	65900	270128	5.65	CAEEL	G5EGK6	Daf-12-interacting protein 1
32	32.1	3	1	8.96	1.5	817000	55695.2	11.42	CAEEL	Q09633	RNase H
33	33.1	3	1	8.94	3.5	697000	16407.1	7.92	CAEEL	Q9N3I5	Uncharacterized protein
34	34.1	1	1	8.91	3.2	27000	43187.7	9.08	CAEEL	P91501	Uncharacterized protein
35	35.1	2	2	8.87	3.3	20300	93067.2	5.18	CAEEL	O62505	Uncharacterized protein
36	36.1	1	1	8.67	1.6	14000	43108.5	6.16	CAEEL	H2L0L6	Nuclear Hormone Receptor family
37	37.1	1	1	8.6	1.5	78900	62439.7	9.54	CAEEL	Q19893	Insulin/EGF-Receptor L Domain protein
38	38.1	3	1	8.57	2.2	295000	39478.2	6.48	CAEEL	G5EGG8	DNA repair protein RAD51 homolog
38	38.1	3	1	8.57	2.2	295000	40081.9	6.74	CAEEL	L8E822	DNA repair protein RAD51 homolog
38	38.1	3	1	8.57	2	295000	43966.3	7.18	CAEEL	Q95Q25	DNA repair protein RAD51 homolog
39	39.1	1	1	8.53	2.8	23500	68832.6	5.78	CAEEL	Q19266	Protein kinase C-like 3
40	40.1	1	1	8.46	3.4	2310	73969.4	5.3	CAEEL	Q93534	TBC (Tre-2/Bub2/Cdc16) domain family
41	41.1	1	1	8.27	1	3470	172524	4.59	CAEEL	P17139	Collagen alpha-1(IV) chain
42	42.1	1	1	8.23	3.7	8580	33426.1	10.11	CAEEL	P34680	Uncharacterized protein ZK757.2
43	43.1	1	1	8.21	1.4	16000	48350.7	6.79	CAEEL	A0A061AKU6	Enoyl-CoA Hydratase
43	43.1	1	1	8.21	1.3	16000	49740.3	6.79	CAEEL	O17762	Enoyl-CoA Hydratase
44	44.1	2	1	8.11	1	52400	100486	4.58	CAEEL	A0A1I6CMA1	Uncharacterized protein
44	44.1	2	1	8.11	1.4	52400	70466	4.48	CAEEL	H2KZW6	Uncharacterized protein
44	44.1	2	1	8.11	1.6	52400	62885	4.34	CAEEL	O44561	Uncharacterized protein
45	45.1	1	1	8.05	0.6	75700	182575	8.95	CAEEL	Q9U263	Histone-lysine N-methyltransferase set-26
46	46.1	4	1	8.01	0.9	1070000	91269.8	9.37	CAEEL	O61794	SUn (SUN) domain Containing Ossification factor homolog
47	47.1	1	1	7.99	5	17100	30302.5	6.95	CAEEL	Q9XX63	Uncharacterized protein
48	48.1	1	1	7.91	4.7	3700	43646.1	9.7	CAEEL	H2KZT2	Serpentine Receptor, class W
48	48.1	1	1	7.91	5.3	3700	39332.1	9.92	CAEEL	Q19561	Serpentine Receptor, class W
49	49.1	1	1	7.89	2.1	17100	69651.3	6.57	CAEEL	G5EFL1	Hexosaminidase
50	50.1	1	1	7.81	4.6	885	32018.6	5.78	CAEEL	A0A131MBE3	SKN-1 Dependent Zygotic transcript
50	50.1	1	1	7.81	5.4	885	27708.9	6.03	CAEEL	A0A131MBL5	SKN-1 Dependent Zygotic transcript
51	51.1	1	1	7.81	1.7	14800	85072.4	8.52	CAEEL	G5EEA7	Anion transporter SULP-4
52	52.1	1	1	7.71	3.2	4750	75979.5	9.98	CAEEL	Q8I4G4	KCNN (Potassium K ChaNNel, calcium activated)-Like
52	52.1	1	1	7.71	3.3	4750	74129.3	9.89	CAEEL	Q8I4G5	KCNN (Potassium K ChaNNel, calcium activated)-Like
53	53.1	1	1	7.7	8.4	6020	14233.5	12.07	CAEEL	I7LHV7	Uncharacterized protein
54	54.1	1	1	7.7	3.9	17900	42523.7	10.31	CAEEL	Q7YXB5	Uncharacterized protein
55	55.1	1	1	7.61	3.5	16600	36553	7.81	CAEEL	P04970	Glyceraldehyde-3-phosphate dehydrogenase 1
55	55.1	1	1	7.61	3.5	16600	36597	7.81	CAEEL	P17331	Glyceraldehyde-3-phosphate dehydrogenase 4
56	56.1	1	1	7.52	16.9	16500	6560.2	10.93	CAEEL	H2KML2	Uncharacterized protein
57	57.1	1	1	7.52	3.8	16100	39284.3	8.41	CAEEL	O44517	Uncharacterized protein
57	57.1	1	1	7.52	3.8	16100	39559.6	8.41	CAEEL	U4PC34	Uncharacterized protein
58	58.1	1	1	7.42	3.9	233000	32727.4	9.31	CAEEL	G5ECX9	CaDmium Responsive
59	59.1	1	1	7.4	3	3640	24665	6.33	CAEEL	Q19660	Uncharacterized protein
60	60.1	1	1	7.35	3.9	7740	31397.2	9.25	CAEEL	E3CTH5	Ectopic P Granules
60	60.1	1	1	7.35	3.1	7740	39863.8	9.53	CAEEL	Q5DTE8	Ectopic P Granules
60	60.1	1	1	7.35	2.8	7740	43962.2	8.92	CAEEL	Q86MP3	Ectopic P Granules
60	60.1	1	1	7.35	2.8	7740	43751	9.15	CAEEL	Q9XX21	Ectopic P Granules
61	61.1	1	1	7.31	2.6	22400	54636.5	5.1	CAEEL	O18195	Daf-16-Dependent Longevity (WT but not daf-16 lifespan increased)
62	62.1	2	1	7.26	1.6	186000	55502.8	6.31	CAEEL	Q09989	SynDaPiN (Synaptic dynamin binding protein) homolog
62	62.1	2	1	7.26	1.6	186000	56251.7	6.31	CAEEL	Q6AHQ8	SynDaPiN (Synaptic dynamin binding protein) homolog
63	63.1	1	1	7.13	1.8	15100	72371.7	6.36	CAEEL	Q9Y1J3	3-phosphoinositide-dependent protein kinase 1
64	64.1	1	1	7	0.3	4560	388048	5.04	CAEEL	A0A1N7SYN2	Uncharacterized protein
64	64.1	1	1	7	0.2	4560	559947	5.13	CAEEL	A0A1N7SYN7	Uncharacterized protein
64	64.1	1	1	7	0.2	4560	562067	5.1	CAEEL	A0A1N7SYN9	Uncharacterized protein
64	64.1	1	1	7	0.2	4560	573884	5.12	CAEEL	A0A1N7SYP3	Uncharacterized protein
64	64.1	1	1	7	0.3	4560	401341	5.03	CAEEL	A0A1N7SYQ0	Uncharacterized protein
64	64.1	1	1	7	0.2	4560	548130	5.1	CAEEL	A0A1N7SYR7	Uncharacterized protein
64	64.1	1	1	7	0.2	4560	504107	5.13	CAEEL	G5ECG5	Uncharacterized protein
64	64.1	1	1	7	0.2	4560	564604	5.1	CAEEL	G5EDD3	Uncharacterized protein
64	64.1	1	1	7	0.2	4560	563365	5.1	CAEEL	G5EFM4	VAB-10B protein
64	64.1	1	1	7	0.3	4560	401944	4.93	CAEEL	Q86NF7	VAB-10B protein
65	65.1	1	1	6.97	3	15100	46416	6.43	CAEEL	Q09270	CRAL-TRIO domain-containing protein C34C12.6
66	66.1	1	1	6.91	4.8	2030	44974.1	9.23	CAEEL	Q9GZG1	Tyrosine-protein kinase
67	67.1	2	1	6.79	2.2	293000	71262.5	9.73	CAEEL	Q9TYX6	SET (Trithorax/polycomb) domain containing
68	68.1	1	1	6.79	3.4	14800	43595.5	9.14	CAEEL	Q9U366	Uncharacterized protein
69	69.1	1	1	6.78	1.6	9410	74089.8	8.98	CAEEL	Q21157	Solute carrier organic anion transporter family member
69	69.1	1	1	6.78	1.6	9410	75139	8.86	CAEEL	X5LQ17	Solute carrier organic anion transporter family member
69	69.1	1	1	6.78	1.7	9410	72521.1	8.88	CAEEL	X5LV99	Solute carrier organic anion transporter family member
69	69.1	1	1	6.78	1.7	9410	71472	8.99	CAEEL	X5M903	Solute carrier organic anion transporter family member
70	70.1	1	1	6.71	3.3	1230	22901.2	6.25	CAEEL	Q9NA97	Uncharacterized protein
71	71.1	1	1	6.67	0.6	3550	206684	6.59	CAEEL	B6VQ59	von (von) Willebrand factor A domain containing
71	71.1	1	1	6.67	0.6	3550	204886	6.54	CAEEL	Q19346	von (von) Willebrand factor A domain containing
71	71.1	1	1	6.67	0.8	3550	152182	6.67	CAEEL	Q7JMA4	von (von) Willebrand factor A domain containing
72	72.1	1	1	6.56	9.5	3410	23470.7	10.24	CAEEL	P49391	Probable 40S ribosomal protein S14, mitochondrial
73	73.1	1	1	6.53	0.2	16900	545358	4.92	CAEEL	Q04833	Low-density lipoprotein receptor-related protein
74	74.1	1	1	6.53	4.2	8000	45367.3	8.38	CAEEL	Q22401	Zinc metalloproteinase-like protein nas-21
75	75.1	2	1	6.53	1.9	21200	72014.6	5	CAEEL	Q9XU06	Uncharacterized protein
76	76.1	1	1	6.48	1.7	26200	51746.1	6.51	CAEEL	Q9TZE1	Uncharacterized protein
77	77.1	2	1	6.47	1.3	324000	98412.1	6.58	CAEEL	P34537	E3 ubiquitin-protein ligase bre-1
78	78.1	1	1	6.43	3.3	1010	27025.1	9.81	CAEEL	G3MU69	Adenine Nucleotide Translocator
78	78.1	1	1	6.43	2.5	1010	34526.6	9.9	CAEEL	G5EFU2	Adenine Nucleotide Translocator
78	78.1	1	1	6.43	2.5	1010	34554.7	9.9	CAEEL	G5EFW8	Adenine Nucleotide Translocator
78	78.1	1	1	6.43	2.6	1010	33542.1	9.64	CAEEL	O01813	Adenine Nucleotide Translocator
78	78.1	1	1	6.43	2.6	1010	33215.3	9.86	CAEEL	O45865	Adenine Nucleotide Translocator
79	79.1	1	1	6.43	9.3	1600	14115.2	7.93	CAEEL	Q21568	NHP2-like protein 1 homolog
80	80.1	1	1	6.42	1.5	53600	84923.3	9.37	CAEEL	Q21376	Putative extracellular sulfatase Sulf-1 homolog
81	81.1	1	1	6.41	2.1	4550	70837.2	5.42	CAEEL	O45246	Heat Shock Protein
82	82.1	1	1	6.4	3.6	1530	21443.3	9.42	CAEEL	G5EG43	Putative prenylated protein tyrosine phosphatase
83	83.1	1	1	6.4	1.7	2840	129264	6.74	CAEEL	Q09564	Protein phosphatase PHLPP-like protein
84	84.1	1	1	6.36	3.3	16000	34255.3	9.85	CAEEL	E1B6T1	GLoBin related
84	84.1	1	1	6.36	4	16000	28276.5	9.52	CAEEL	E1B6T2	GLoBin related
84	84.1	1	1	6.36	3.1	16000	36789.3	9.78	CAEEL	Q8MPY8	GLoBin related
85	85.1	1	1	6.33	2.6	52800	45159.7	8.74	CAEEL	Q22347	Probable medium-chain specific acyl-CoA dehydrogenase 10, mitochondrial
86	86.1	1	1	6.27	2.2	149000	61407.8	9.55	CAEEL	H2KYE7	Uncharacterized protein
86	86.1	1	1	6.27	1.5	149000	91049.1	8.95	CAEEL	Q3HKB7	Uncharacterized protein
87	87.1	1	1	6.24	2.4	1550	95296	7.72	CAEEL	H2L060	Uncharacterized protein
87	87.1	1	1	6.24	2.6	1550	89263.3	6.92	CAEEL	Q20599	Uncharacterized protein
88	88.1	1	1	6.23	13.6	31900	10841	6.05	CAEEL	Q23428	Uncharacterized protein
89	89.1	1	1	6.22	3.5	14000	38678	8.61	CAEEL	O76719	Major sperm protein
90	90.1	1	1	6.16	2.6	2060	47818.8	5.1	CAEEL	G5EDL7	RILP (Rab7-Interacting Lysosomal Protein) homolog
90	90.1	1	1	6.16	2.6	2060	48572.6	5.1	CAEEL	G5EFB9	RILP (Rab7-Interacting Lysosomal Protein) homolog
91	91.1	3	1	6.16	2.4	171000	94171.3	6.19	CAEEL	O17744	Uncharacterized protein
92	92.1	1	1	6.04	0.4	22700	231090	9.01	CAEEL	O16237	LysM Domain (Peptidoglycan binding) protein
93	93.1	5	1	5.98	1.1	116000	136062	9.56	CAEEL	Q23260	Myosin Light Chain Kinase related
94	94.1	1	1	5.97	0.8	2650	107121	4.89	CAEEL	G5EDT4	Uncharacterized protein
94	94.1	1	1	5.97	0.8	2650	105915	4.89	CAEEL	G5EEP7	Uncharacterized protein
95	95.1	1	1	5.93	2.6	5500	40152.9	9.67	CAEEL	Q9GRY7	Serpentine Receptor, class H
96	96.1	1	1	5.92	6.2	15100	21366.4	10.89	CAEEL	P10771	Histone H1.1
97	97.1	1	1	5.89	10	162000	13835.1	8.23	CAEEL	Q7YWP1	Uncharacterized protein
98	98.1	1	1	5.86	3.8	6560	28646.9	9.87	CAEEL	Q22621	Uncharacterized protein
99	99.1	2	1	5.84	15.3	0	13532.4	6.64	CAEEL	Q09506	Uncharacterized protein C45G9.7
100	100.1	1	1	5.82	3	13000	48565.2	10.7	CAEEL	P34488	Putative G-protein coupled receptor F59B2.13
101	101.1	1	1	5.8	0.3	8050	460350	5.95	CAEEL	G5EBH3	SMAll
101	101.1	1	1	5.8	0.2	8050	472260	6.01	CAEEL	G5EC35	Beta chain spectrin homolog Sma1
101	101.1	1	1	5.8	0.2	8050	484047	5.98	CAEEL	G5EFW3	SMAll
101	101.1	1	1	5.8	0.3	8050	462525	6.02	CAEEL	G5EG97	SMAll
102	102.1	1	1	5.79	2.9	18900	40441.2	7.88	CAEEL	Q9XXS2	SET (Trithorax/polycomb) domain containing
103	103.1	1	1	5.75	2.8	106000	29126.7	6.24	CAEEL	Q19812	Uncharacterized protein
104	104.1	1	1	5.73	0.8	7990	113205	6.2	CAEEL	Q09600	Vacuolar protein sorting-associated protein 11 homolog
105	105.1	1	1	5.73	0.5	16000	123571	4.61	CAEEL	Q9N5V3	IMportin Beta family
106	106.1	1	1	5.7	8.5	8290	10899.1	6.34	CAEEL	Q9XWC0	Uncharacterized protein
107	107.1	1	1	5.66	6.6	31900	21386.9	9.95	CAEEL	G4S101	Uncharacterized protein
108	108.1	1	1	5.65	1.2	14800	139347	6.68	CAEEL	G5EG03	p-GlycoProtein related
109	109.1	1	1	5.65	1.6	12100	68181.2	9.45	CAEEL	Q17532	Uncharacterized protein
110	110.1	1	1	5.63	10.4	25800	14299.6	11.25	CAEEL	G3MU77	SR Protein (Splicing factor)
110	110.1	1	1	5.63	4.8	25800	32852.5	11.01	CAEEL	Q9XTZ2	SR Protein (Splicing factor)
111	111.1	1	1	5.62	12.5	46400	11770.5	6.11	CAEEL	Q8MPX7	SaPosin-like Protein family
112	112.1	1	1	5.54	2	42500	77300.5	7.79	CAEEL	Q20059	WD repeat-containing protein 48 homolog
113	113.1	1	1	5.5	3.9	11900	38205.5	9.21	CAEEL	O62506	Seven TM Receptor
114	114.1	1	1	5.43	1.1	69700	57885.6	6.45	CAEEL	O62377	CYtochrome P450 family
115	115.1	1	1	5.38	2.1	6740	77817.4	6	CAEEL	O62446	Leishmanolysin-like peptidase
116	116.1	1	1	5.37	2.7	16900	50358	5.65	CAEEL	G1K0W2	Multiple PDZ domain protein
116	116.1	1	1	5.37	1.3	16900	106041	6.18	CAEEL	G1K0W3	Multiple PDZ domain protein
116	116.1	1	1	5.37	0.9	16900	153247	5.77	CAEEL	G1K0W4	Multiple PDZ domain protein
116	116.1	1	1	5.37	0.5	16900	261793	6.3	CAEEL	G5EC55	Multiple PDZ domain protein
116	116.1	1	1	5.37	0.5	16900	259362	6.16	CAEEL	G5EC95	Multiple PDZ domain protein
116	116.1	1	1	5.37	0.5	16900	239034	6.11	CAEEL	G5ECF9	Multiple PDZ domain protein
116	116.1	1	1	5.37	0.5	16900	273315	6.52	CAEEL	G5ECZ8	Multiple PDZ domain protein
116	116.1	1	1	5.37	0.5	16900	238594	6.05	CAEEL	G5EGP5	Multiple PDZ domain protein
116	116.1	1	1	5.37	0.5	16900	240655	6.19	CAEEL	Q09EF4	Multiple PDZ domain protein
117	117.1	1	1	5.36	2.6	2270	57854.7	6.18	CAEEL	Q27471	CYtochrome P450 family
118	118.1	1	1	5.33	2.6	46900	64522.3	5.76	CAEEL	G5EGP1	Uncharacterized protein
119	119.1	3	1	5.31	0.8	78700	126499	6.64	CAEEL	Q22992	Protein sumv-2
120	120.1	1	1	5.28	0.6	106000	140707	6.32	CAEEL	G4S4A1	Voltage-dependent calcium channel unc-36
120	120.1	1	1	5.28	0.6	106000	145743	6.21	CAEEL	P34374	Voltage-dependent calcium channel unc-36
121	121.1	1	1	5.26	4.1	149000	35171.3	9.32	CAEEL	O16222	Uncharacterized protein
122	122.1	1	1	5.22	2.4	149000	55793.7	8.76	CAEEL	O16518	Aldehyde dehydrogenase
122	122.1	1	1	5.22	2.4	149000	55797.7	8.76	CAEEL	Q86S57	Aldehyde dehydrogenase
122	122.1	1	1	5.22	2.4	149000	55779.7	8.59	CAEEL	Q8MXJ7	Aldehyde dehydrogenase
123	123.1	1	1	5.2	6.1	690	18561.2	9.56	CAEEL	Q9N4A2	Uncharacterized protein
124	124.1	1	1	5.18	2.4	14500	94846.8	5.9	CAEEL	Q18286	Exocyst complex component 6
125	125.1	1	1	5.15	0.1	262000	790266	5.78	CAEEL	A0A061ACT3	Twitchin
125	125.1	1	1	5.15	0.1	262000	791280	5.79	CAEEL	A0A061AE24	Twitchin
125	125.1	1	1	5.15	0.1	262000	792932	5.79	CAEEL	Q23551	Twitchin
126	126.1	1	1	5.14	2.3	7670	35214.6	5.46	CAEEL	Q10905	Cell death-related nuclease 4
127	127.1	1	1	5.13	2.7	17500	97202	5.77	CAEEL	Q19070	Eft-1 protein
127	127.1	1	1	5.13	2.3	17500	111453	4.94	CAEEL	Q23463	Elongation Factor TU family
128	128.1	1	1	5.12	1.3	22000	78073.3	9.8	CAEEL	Q86S68	CDT (S. pombe CDC10 Dependent Transcript) homolog
129	129.1	1	1	5.12	3.6	7310	29003.3	9.04	CAEEL	Q9N5U6	Uncharacterized protein
130	130.1	1	1	5.08	0.2	9630	413952	5.98	CAEEL	A5Z2S3	Uncharacterized protein
130	130.1	1	1	5.08	0.2	9630	414194	5.98	CAEEL	O62263	Uncharacterized protein
131	131.1	1	1	5.07	10.7	22700	9254.5	6.24	CAEEL	A0A061AD09	Alcohol/Ribitol Dehydrogenase family
131	131.1	1	1	5.07	3.4	22700	27199.7	8.71	CAEEL	Q19102	Alcohol/Ribitol Dehydrogenase family
132	132.1	1	1	5.06	0.5	4620	129654	6.11	CAEEL	B7CED8	Calcium-transporting ATPase
132	132.1	1	1	5.06	0.4	4620	136296	5.81	CAEEL	O76832	Calcium-transporting ATPase
132	132.1	1	1	5.06	0.5	4620	125508	5.62	CAEEL	Q8MXS0	Calcium-transporting ATPase
132	132.1	1	1	5.06	0.4	4620	135660	5.8	CAEEL	Q95XP5	Calcium-transporting ATPase
132	132.1	1	1	5.06	0.5	4620	127849	5.56	CAEEL	Q95XP6	Calcium-transporting ATPase
132	132.1	1	1	5.06	0.5	4620	112614	6.69	CAEEL	U4PMD6	Calcium-transporting ATPase
133	133.1	1	1	5.06	7.5	3880	25514.6	9.26	CAEEL	Q94230	Pur alpha Like Protein
134	134.1	1	1	5.05	8.4	8560	28828.4	8.8	CAEEL	O01340	Uncharacterized protein
135	135.1	1	1	4.98	7.1	22200	22535.6	9.02	CAEEL	Q4PJ11	Uncharacterized protein
136	136.1	1	1	4.94	0.6	24800	139891	6.84	CAEEL	H2L0I5	Phosphorylase b kinase regulatory subunit
136	136.1	1	1	4.94	0.6	24800	142479	7.17	CAEEL	H2L0I6	Phosphorylase b kinase regulatory subunit
136	136.1	1	1	4.94	3.2	24800	28370.8	9.13	CAEEL	Q5W7E3	Phosphorylase b kinase regulatory subunit
137	137.1	1	1	4.8	0.7	368000	116039	9.33	CAEEL	O45813	Transporter
138	138.1	1	1	4.8	1.7	2290	46858.2	9.32	CAEEL	O61747	Uncharacterized protein
139	139.1	1	1	4.79	1.4	2460	71024.6	5.48	CAEEL	Q21374	Uncharacterized protein
140	140.1	1	1	4.74	3	5850	37436.5	6.03	CAEEL	Q93596	Uncharacterized protein
141	141.1	1	1	4.73	1.1	10100	124748	9.21	CAEEL	P34339	Eukaryotic translation initiation factor 3 subunit A
142	142.1	1	1	4.7	7	1010	22455.3	8.83	CAEEL	Q18311	GLoBin related
143	143.1	1	1	4.7	5.5	11100	48836.4	10.06	CAEEL	Q7YTQ3	B3GNT1, Beta-1,3-N-acetylGucosamiNylTransferase 1, homolog
144	144.1	1	1	4.61	1.4	12700	55261.6	5.96	CAEEL	G5ED07	Protein disulfide-isomerase
145	145.1	1	1	4.61	1.6	22600	103740	9.36	CAEEL	G5EFD9	Disintegrin and metalloproteinase domain-containing protein 10 homolog
146	146.1	1	1	4.55	13.9	8270	17634.6	9.1	CAEEL	C1P662	Uncharacterized protein
147	147.1	1	1	4.55	3.4	16600	36876.1	5.84	CAEEL	Q9N4M7	SaPosin-like Protein family
147	147.1	1	1	4.55	3.4	16600	37360.6	5.66	CAEEL	V6CM12	SaPosin-like Protein family
148	148.1	1	1	4.54	0.7	65100	141252	8.57	CAEEL	Q09591	Mitotic chromosome and X-chromosome-associated protein mix-1
149	149.1	1	1	4.53	3.8	16600	37131.9	9.04	CAEEL	Q19584	Ubiquitin fusion degradation protein 1 homolog
149	149.1	1	1	4.53	3.8	16600	36748.5	9.31	CAEEL	Q9U3I6	Ubiquitin fusion degradation protein 1 homolog
150	150.1	1	1	4.52	0.8	20700	179536	6.14	CAEEL	A0A0K3AQN0	Uncharacterized protein
150	150.1	1	1	4.52	1.6	20700	97142.8	7.43	CAEEL	A0A0K3AQS4	Uncharacterized protein
150	150.1	1	1	4.52	1.2	20700	120289	9.11	CAEEL	A0A0K3ARB1	Uncharacterized protein
150	150.1	1	1	4.52	0.9	20700	166996	6.04	CAEEL	A0A0K3ATL6	Uncharacterized protein
150	150.1	1	1	4.52	1.5	20700	100077	6.84	CAEEL	A0A0K3ATR0	Uncharacterized protein
150	150.1	1	1	4.52	1.3	20700	111998	8.68	CAEEL	A0A0K3AUB5	Uncharacterized protein
150	150.1	1	1	4.52	0.9	20700	155955	6.31	CAEEL	A0A0K3AWN6	Uncharacterized protein
151	151.1	1	1	4.51	1.1	33100	133344	6.24	CAEEL	A0A2K5ATP8	Guanylate cyclase
151	151.1	1	1	4.51	1.1	33100	134016	6.1	CAEEL	A0A2K5ATQ4	Guanylate cyclase
151	151.1	1	1	4.51	1.1	33100	132667	6.32	CAEEL	A0A2K5ATR8	Guanylate cyclase
151	151.1	1	1	4.51	1.1	33100	133443	6.24	CAEEL	O16544	Receptor-type guanylate cyclase gcy-19
152	152.1	1	1	4.5	1.5	15800	81594.8	6.04	CAEEL	Q22145	High Incidence of Males (Increased X chromosome loss)
153	153.1	1	1	4.49	6.6	59700	17429.7	6.77	CAEEL	Q20424	Uncharacterized protein
154	154.1	1	1	4.48	1.9	18300	37267.8	9.47	CAEEL	Q9N5I2	Uncharacterized protein
155	155.1	1	1	4.46	4.5	53600	46776.7	7.82	CAEEL	H2L0B0	Nuclear Hormone Receptor family
155	155.1	1	1	4.46	4.9	53600	43296.9	8.76	CAEEL	Q86PJ5	Nuclear Hormone Receptor family
155	155.1	1	1	4.46	7.4	53600	28890.5	9.47	CAEEL	Q8MXE5	Nuclear Hormone Receptor family
155	155.1	1	1	4.46	5.5	53600	38365.1	6.21	CAEEL	S6FD08	Nuclear Hormone Receptor family
156	156.1	2	1	4.44	7.6	14500	15599.5	9.49	CAEEL	Q9XXR5	TransThyretin-Related family domain
157	157.1	1	1	4.42	12	2000	8753	6.56	CAEEL	Q8WQC1	Uncharacterized protein
158	158.1	1	1	4.39	4.3	26500	33443	9.91	CAEEL	Q21084	SLC (SoLute Carrier) homolog
159	159.1	1	1	4.39	1.2	117000	64769.2	8.32	CAEEL	Q9N4M3	AcetylCholine Receptor
160	160.1	1	1	4.36	0.3	4630	323152	7.54	CAEEL	G5EFC7	LYSosomal Trafficking regulator protein
161	161.1	1	1	4.33	9	131000	16740.7	8.01	CAEEL	P91214	C-type LECtin
162	162.1	1	1	4.3	1.2	31900	74303.1	9.33	CAEEL	Q9TYV5	NucleOLar protein
163	163.1	1	1	4.27	4.9	16800	13747.8	9.95	CAEEL	Q9N4Z4	Uncharacterized protein
164	164.1	1	1	4.25	3.7	1960	41851.8	8.95	CAEEL	Q8IG38	Lateral Signaling Target
165	165.1	1	1	4.2	8.5	1650	14083.6	4.68	CAEEL	Q95YB3	Uncharacterized protein
166	166.1	1	1	4.12	1.3	20400	117666	4.92	CAEEL	G5EC21	Protein qua-1
167	167.1	1	1	4.07	2.1	3530	70112.2	6.24	CAEEL	Q9N303	Uncharacterized protein
167	167.1	1	1	4.07	2.2	3530	65082.7	6.46	CAEEL	V6CLC9	Uncharacterized protein
168	168.1	1	1	4.06	2.6	2080	39632.2	9.2	CAEEL	Q9GUE5	Seven TM Receptor
169	169.1	1	1	3.98	2.9	32700	50289	7.15	CAEEL	Q20755	BCS1 (Mitochondrial chaperone) homolog
169	169.1	1	1	3.98	3.2	32700	45472.8	8.55	CAEEL	Q58AA8	BCS1 (Mitochondrial chaperone) homolog
170	170.1	1	1	3.97	2.8	141000	33664.2	7.83	CAEEL	Q22254	Uncharacterized protein
171	171.1	1	1	3.96	7.1	3650	19398.1	4.44	CAEEL	Q9XX92	Uncharacterized protein
172	172.1	1	1	3.92	10.8	14400	10872.1	11.32	CAEEL	Q9XWU9	Uncharacterized protein
173	173.1	1	1	3.91	1.5	2340	86064.3	9.27	CAEEL	O61660	DNA topoisomerase 3
174	174.1	1	1	3.9	0.4	3870	252754	9.26	CAEEL	H2L2A7	A disintegrin and metalloproteinase with thrombospondin motifs gon-1
174	174.1	1	1	3.9	0.4	3870	251079	9.28	CAEEL	Q19791	A disintegrin and metalloproteinase with thrombospondin motifs gon-1
175	175.1	1	1	3.9	1.4	6540	78094	7.74	CAEEL	Q86NJ9	RNA Binding Motif protein homolog
175	175.1	1	1	3.9	1.1	6540	94949.9	9.75	CAEEL	Q86NK0	RNA Binding Motif protein homolog
175	175.1	1	1	3.9	1.1	6540	98161.5	9.74	CAEEL	Q8T8N7	RNA Binding Motif protein homolog
175	175.1	1	1	3.9	1	6540	105153	9.55	CAEEL	Q9BIC2	RNA Binding Motif protein homolog
175	175.1	1	1	3.9	1	6540	105025	9.55	CAEEL	Q9GYS7	RNA Binding Motif protein homolog
176	176.1	1	1	3.85	1.4	149000	94337.2	8.66	CAEEL	H2L2B2	Uncharacterized protein
176	176.1	1	1	3.85	1.4	149000	94240	8.66	CAEEL	H2L2B3	Uncharacterized protein
176	176.1	1	1	3.85	1.4	149000	94079.9	8.66	CAEEL	Q20453	Uncharacterized protein
176	176.1	1	1	3.85	1.5	149000	88505.9	8.91	CAEEL	Q7YTV3	Uncharacterized protein
176	176.1	1	1	3.85	1.5	149000	88930.4	7.48	CAEEL	Q8I4I7	Uncharacterized protein
177	177.1	1	1	3.83	7.5	1880	11362	9.55	CAEEL	D7SFP1	Uncharacterized protein
178	178.1	1	1	3.71	1.4	16800	40835.4	6.14	CAEEL	O45256	Protein containing ALS2cr12 (ALS2CR12) signature
178	178.1	1	1	3.71	2.2	16800	25905.9	4.46	CAEEL	Q9U2W9	DNA replication complex GINS protein SLD5
179	179.1	1	1	3.59	0.6	10900	110349	9.11	CAEEL	Q93781	CSB (Cockayne Syndrome B) homolog
180	180.1	1	1	3.58	3.4	23400	61886.5	6.33	CAEEL	Q9BIB7	HnRNP F homolog
181	181.1	1	1	3.57	1.7	2100	84573.1	9.7	CAEEL	Q9XVH3	MLt-TeN (Mlt-10) related
182	182.1	1	1	3.56	10.3	9630	22680.7	5.81	CAEEL	Q17819	Probable oligoribonuclease
183	183.1	1	1	3.55	2.3	13000	58697.2	5.71	CAEEL	A0A2K5ATZ7	Uncharacterized protein
183	183.1	1	1	3.55	2.4	13000	57816.3	5.86	CAEEL	A0A2K5AU00	Uncharacterized protein
184	184.1	1	1	3.52	2	3560	67933.4	9.72	CAEEL	Q11181	Uncharacterized protein C05D10.4
185	185.1	1	1	3.52	1.8	4490	76548.1	5.82	CAEEL	Q18406	Exocyst complex component 5
186	186.1	1	1	3.47	2.6	15100	46846.3	9.38	CAEEL	Q9GYS6	Uncharacterized protein
187	187.1	1	1	3.46	0.9	8290	92435.7	5.94	CAEEL	Q8WQB3	AP-1 complex subunit gamma
188	188.1	1	1	3.45	2.9	17100	46516.2	5.85	CAEEL	P21137	cAMP-dependent protein kinase catalytic subunit
189	189.1	1	1	3.43	3.8	13200	35818.8	8.87	CAEEL	Q9N2K7	Putative T-box protein 30/42
190	190.1	1	1	3.4	9.9	7700	18401.9	9.99	CAEEL	Q21525	Uncharacterized protein
191	191.1	1	1	3.37	5.1	2140	51544	5.69	CAEEL	Q93703	Tyrosine AminoTraNsferase
192	192.1	1	1	3.35	2.4	26500	55901.7	5.37	CAEEL	Q9U2Y2	CDK5RAP3-like protein
193	193.1	1	1	3.32	1.5	1320	108389	6.7	CAEEL	H2KYB6	TeTratriCopeptide repeat domain protein related
194	194.1	1	1	3.31	5.9	14500	41137.5	8.91	CAEEL	O02226	Uncharacterized protein
195	195.1	1	1	3.31	1.9	13500	109152	4.85	CAEEL	Q9U1T9	EGF plus ASC domain ion channel
196	196.1	1	1	3.25	4.2	21400	29157.5	10.61	CAEEL	Q9N3X2	40S ribosomal protein S4
197	197.1	1	1	3.24	3.1	26200	36715.2	9.61	CAEEL	A0A2C9C349	Serpentine Receptor, class D (Delta)
197	197.1	1	1	3.24	5.7	26200	19803.4	9.63	CAEEL	A0A2C9C3E0	Serpentine Receptor, class D (Delta)
197	197.1	1	1	3.24	3.1	26200	36893.5	9.82	CAEEL	Q17760	Serpentine receptor class delta-7
198	198.1	1	1	3.2	1.3	105000	41870.4	8.85	CAEEL	Q09655	G patch domain and ankyrin repeat-containing protein 1 homolog
199	199.1	1	1	3.19	7.1	0	25104	7.93	CAEEL	O44620	Sugar transporter SWEET
200	200.1	1	1	3.19	0.9	8290	93841.1	5.65	CAEEL	Q20374	Protein PAT1 homolog 1
201	201.1	1	1	3.18	1.1	1040	153306	6.54	CAEEL	Q02331	Uncharacterized NTE family protein ZK370.4
202	202.1	1	1	3.17	5.7	5220	28161.8	5.82	CAEEL	B6VQ70	Uncharacterized protein
203	203.1	1	1	3.12	1.7	162000	85687.2	8.71	CAEEL	A0A164D3K0	O-ACyltransferase homolog
203	203.1	1	1	3.12	1.7	162000	85513.1	8.71	CAEEL	Q9N3Z2	O-ACyltransferase homolog
204	204.1	1	1	3.07	2.6	3430	37370.5	9.23	CAEEL	O16380	Fasting Induced Lipase
205	205.1	1	1	3.05	0.9	11600	81865.5	9.29	CAEEL	G5EFR8	PEX6
206	206.1	1	1	3	3.9	5000	29865.5	9.33	CAEEL	Q23142	Uncharacterized protein
207	207.1	1	1	2.99	6.6	131000	21778.5	9.96	CAEEL	P34565	Uncharacterized protein T16H12.2
208	208.1	1	1	2.91	0.9	33100	159720	5.76	CAEEL	Q2AAB7	Uncharacterized protein
208	208.1	1	1	2.91	0.9	33100	160158	5.76	CAEEL	W6RTG0	Uncharacterized protein
209	209.1	1	1	2.84	1.9	61200	76239.4	8.71	CAEEL	O17388	Transmembrane 9 superfamily member
210	210.1	1	1	2.76	0.7	8720	89536.8	6.39	CAEEL	Q9BKX7	Uncharacterized protein
211	211.1	1	1	2.7	4	3330	28497.5	7.88	CAEEL	A0A3P6NNX8	Uncharacterized protein
211	211.1	1	1	2.7	4.2	3330	26507.2	6.99	CAEEL	E9P8A1	Uncharacterized protein
212	212.1	1	1	2.64	3.6	5100	28468.4	9.45	CAEEL	Q93548	PHd Finger family
213	213.1	1	1	2.57	3.3	13600	37322.2	9.17	CAEEL	O44840	Serpentine Receptor, class I
214	214.1	1	1	2.49	5.1	23400	42359.9	9.55	CAEEL	Q966B4	Seven TM Receptor
215	215.1	1	1	2.42	2.7	19200	44680.2	6.85	CAEEL	Q10454	Probable arginine kinase F46H5.3
216	216.1	1	1	2.37	0.6	1800	234600	5.44	CAEEL	A0A0K3AS47	Uncharacterized protein
216	216.1	1	1	2.37	0.6	1800	234875	5.44	CAEEL	A0A0K3AUI7	Uncharacterized protein
217	217.1	1	1	2.34	5.1	26500	30976.8	5.31	CAEEL	P91061	Uncharacterized protein
218	218.1	1	1	2.29	4.4	8210	23210.5	5.91	CAEEL	A8WHT6	Ribosomal protein S6 Kinase Delta homolog
218	218.1	1	1	2.29	1	8210	96324.6	5.5	CAEEL	Q20821	Ribosomal protein S6 Kinase Delta homolog
219	219.1	1	1	2.28	3.6	749	39641.2	8.96	CAEEL	O45691	Uncharacterized protein
220	220.1	1	1	2.22	1.5	1100	98752.5	6.66	CAEEL	B6VQ94	Uncharacterized protein
221	221.1	1	1	2.12	2.6	19000	53284.8	6.25	CAEEL	Q95XA8	CREB-regulated transcription coactivator 1 homolog
222	222.1	1	1	1.99	0.9	3730	131395	5.76	CAEEL	G4RXT9	Uncharacterized protein
222	222.1	1	1	1.99	0.8	3730	146037	6.14	CAEEL	Q400L7	Uncharacterized protein
222	222.1	1	1	1.99	1.1	3730	111653	5.9	CAEEL	Q7Z298	Uncharacterized protein
223	223.1	1	1	1.93	10.5	34100	12488.3	6.06	CAEEL	Q20096	Uncharacterized protein
224	224.1	1	1	1.88	2.4	1150	91522.6	9.44	CAEEL	G5EBW2	Ubiquitin Specific Protease
224	224.1	1	1	1.88	4.2	1150	53462	9.86	CAEEL	H2KZK8	Uncharacterized protein
224	224.1	1	1	1.88	4.2	1150	53078.5	9.81	CAEEL	Q688A5	Uncharacterized protein
225	225.1	1	1	1.77	1.6	6820	98575.5	5.95	CAEEL	Q9XUY0	Uncharacterized protein
226	226.1	1	1	1.55	2.6	6920	43151.4	6.24	CAEEL	Q23144	Uncharacterized protein
227	227.1	1	1	1.53	1.8	17900	69853.8	6.43	CAEEL	A0A0K3ATC0	Tyramine beta-hydroxylase
227	227.1	1	1	1.53	1.6	17900	75703.6	6.72	CAEEL	Q9XTQ6	Tyramine beta-hydroxylase
228	228.1	1	1	1.44	2.4	817	47878	6.97	CAEEL	G5EDS9	Dwarfin sma
Totals:	459	370
Group	Subgroup	Spectra	Distinct	Distinct	% AA	Total	Protein MW	Protein	Species	Database	Protein Name
(#)	(#)	(#)	Peptides	Summed	Coverage	Protein	(Da)	pI		Accession #
			(#)	MS/MS Search		Spectral
				Score		Intensity
1	1.1	6	3	24.24	6.3	48500	42137.4	5.3	CAEEL	P0DM41
#	Filename	z	Score	Spectrum	Variable	Sequence	Sequence Map	Modifications	MH+	MH+	MH+
				Intensity	Sites			Map	Matched	Mass Shift	Error
									(Da)	(Da)	(ppm)
1	CSAKAZAKII48HB.2805.2805.2	2	8.85	4500		(K)IIAPPER(K)	(K)I/I|A|P/P E/R(K)		795.472	-0.0016	-2.1
2	CSAKAZAKII48HC.3429.3429.2	2	7.72	2250		(K)EITALAPSTMK(I)	(K)E\I|T A|L A P/S T M/K(I)		1161.62	-0.0112	-9.6
3	CSAKAZAKII48HA.2904.2904.2	2	7.67	16800		(R)LDLAGR(D)	(R)L/D|L|A/G/R(D)		644.373	-0.0035	-5.5
4	CSAKAZAKII48HB.2813.2813.2	2	7.32	4500		(K)IIAPPER(K)	(K)I|I|A/P/P E R(K)		795.472	-0.0016	-2.1
5	CSAKAZAKII48HB.2800.2800.2	2	6.41	4500		(K)IIAPPER(K)	(K)I I|A/P/P E R(K)		795.472	-0.0016	-2.1
6	CSAKAZAKII48HB.2890.2890.2	2	5.93	16000		(R)LDLAGR(D)	(R)L/D|L/A/G/R(D)		644.373	-0.0018	-2.9
Group	Subgroup	Spectra	Distinct	Distinct	% AA	Total	Protein MW	Protein	Species	Database	Protein Name
(#)	(#)	(#)	Peptides	Summed	Coverage	Protein	(Da)	pI		Accession #
			(#)	MS/MS Search		Spectral
				Score		Intensity
2	2.1	2	2	16.51	1.6	201000	87766.2	9.17	CAEEL	B7FAS5
#	Filename	z	Score	Spectrum	Variable	Sequence	Sequence Map	Modifications	MH+	MH+	MH+
				Intensity	Sites			Map	Matched	Mass Shift	Error
									(Da)	(Da)	(ppm)
1	CSAKAZAKII48HA.2608.2608.2	2	10.98	105000		(K)SGGPSKK(M)	(K)S/G|G/P\S/K\K(M)		660.367	0.0008	1.1
2	CSAKAZAKII48HB.2614.2614.2	2	5.53	96400		(R)NGSVRK(V)	(R)N/G S|V R K(V)		660.379	-0.0105	-15.9
3	CSAKAZAKII48HB.2622.2622.2	2	4.22	96400		(K)NGSVKR(V)	(K)N/G S|V K/R(V)		660.379	-0.0105	-15.9
Group	Subgroup	Spectra	Distinct	Distinct	% AA	Total	Protein MW	Protein	Species	Database	Protein Name
(#)	(#)	(#)	Peptides	Summed	Coverage	Protein	(Da)	pI		Accession #
			(#)	MS/MS Search		Spectral
				Score		Intensity
3	3.1	8	1	16.18	1.2	3070000	53610.1	6.17	CAEEL	Q09400
#	Filename	z	Score	Spectrum	Variable	Sequence	Sequence Map	Modifications	MH+	MH+	MH+
				Intensity	Sites			Map	Matched	Mass Shift	Error
									(Da)	(Da)	(ppm)
1	CSAKAZAKII48HA.2478.2555.2	2	16.18	351000		(K)SGLLNR(F)	(K)S/G|L|L N/R(F)		659.384	-0.0003	-0.5
2	CSAKAZAKII48HB.2473.2552.2	2	14.6	418000		(K)SGLLNR(F)	(K)S/G|L|L N/R(F)		659.384	-0.001	-1.5
3	CSAKAZAKII48HC.2460.2539.2	2	12.8	371000		(K)SGLLNR(F)	(K)S/G|L|L N/R(F)		659.384	-0.001	-1.5
4	CSAKAZAKII48HA.2560.2560.2	2	10.61	351000		(K)SGLLNR(F)	(K)S/G|L|L N R(F)		659.384	-0.0012	-1.9
5	CSAKAZAKII48HC.2551.2551.2	2	8.51	371000		(K)SGLLNR(F)	(K)S/G|L|L N/R(F)		659.384	-0.0013	-2
6	CSAKAZAKII48HB.2558.2558.2	2	7.93	418000		(K)SGLLNR(F)	(K)S/G|L|L N/R(F)		659.384	-0.002	-3
7	CSAKAZAKII48HC.2544.2544.2	2	7.44	371000		(K)SGLLNR(F)	(K)S/G|L|L N/R(F)		659.384	-0.0013	-2
8	CSAKAZAKII48HB.2562.2562.2	2	4.47	418000		(K)SGLLNR(F)	(K)S/G|L|L N R(F)		659.384	-0.002	-3
Group	Subgroup	Spectra	Distinct	Distinct	% AA	Total	Protein MW	Protein	Species	Database	Protein Name
(#)	(#)	(#)	Peptides	Summed	Coverage	Protein	(Da)	pI		Accession #
			(#)	MS/MS Search		Spectral
				Score		Intensity
4	4.1	7	1	15.18	1	731000	63688.4	5.62	CAEEL	Q9N4P3
#	Filename	z	Score	Spectrum	Variable	Sequence	Sequence Map	Modifications	MH+	MH+	MH+
				Intensity	Sites			Map	Matched	Mass Shift	Error
									(Da)	(Da)	(ppm)
1	CSAKAZAKII48HA.2579.2584.2	2	15.18	105000		(R)SGIDLR(N)	(R)S/G|I|D L/R(N)		660.367	-0.0012	-1.8
2	CSAKAZAKII48HC.2557.2568.2	2	13.4	105000		(R)SGIDLR(N)	(R)S/G|I|D L/R(N)		660.367	-0.0003	-0.5
3	CSAKAZAKII48HB.2580.2591.2	2	11.85	121000		(R)SGIDLR(N)	(R)S/G|I|D L/R(N)		660.367	-0.0017	-2.6
4	CSAKAZAKII48HC.2587.2592.2	2	8.06	105000		(R)SGIDLR(N)	(R)S/G|I|D L/R(N)		660.367	-0.0003	-0.5
5	CSAKAZAKII48HA.2613.2613.2	2	7.25	105000		(R)SGIDLR(N)	(R)S/G|I|D L R(N)		660.367	0.0008	1.1
6	CSAKAZAKII48HB.2617.2617.2	2	4.69	96400		(R)SGIDLR(N)	(R)S/G|I|D L/R(N)		660.367	0.0007	1.1
7	CSAKAZAKII48HA.2617.2617.2	2	4.35	93700		(R)SGIDLR(N)	(R)S/G|I|D/L/R(N)		660.367	0.0008	1.1
Group	Subgroup	Spectra	Distinct	Distinct	% AA	Total	Protein MW	Protein	Species	Database	Protein Name
(#)	(#)	(#)	Peptides	Summed	Coverage	Protein	(Da)	pI		Accession #
			(#)	MS/MS Search		Spectral
				Score		Intensity
5	5.1	4	1	12.86	1.8	92100	38009.2	8.8	CAEEL	V6CLB7
#	Filename	z	Score	Spectrum	Variable	Sequence	Sequence Map	Modifications	MH+	MH+	MH+
				Intensity	Sites			Map	Matched	Mass Shift	Error
									(Da)	(Da)	(ppm)
1	CSAKAZAKII48HB.2621.2630.2	2	12.86	25800		(K)GYLENK(T)	(K)G/Y|L|E/N K(T)		723.367	-0.0024	-3.4
2	CSAKAZAKII48HA.2630.2639.2	2	11.84	17100		(K)GYLENK(T)	(K)G/Y|L|E/N/K(T)		723.367	-0.0024	-3.3
3	CSAKAZAKII48HC.2607.2615.2	2	11.2	23400		(K)GYLENK(T)	(K)G/Y|L|E/N/K(T)		723.367	-0.0015	-2.1
4	CSAKAZAKII48HB.2661.2661.2	2	7.77	25800		(K)GYLENK(T)	(K)G/Y|L/E/N K(T)		723.367	0.0011	1.6
Group	Subgroup	Spectra	Distinct	Distinct	% AA	Total	Protein MW	Protein	Species	Database	Protein Name
(#)	(#)	(#)	Peptides	Summed	Coverage	Protein	(Da)	pI		Accession #
			(#)	MS/MS Search		Spectral
				Score		Intensity
6	6.1	1	1	12.57	0.9	75700	109608	4.37	CAEEL	Q09560
#	Filename	z	Score	Spectrum	Variable	Sequence	Sequence Map	Modifications	MH+	MH+	MH+
				Intensity	Sites			Map	Matched	Mass Shift	Error
									(Da)	(Da)	(ppm)
1	CSAKAZAKII48HC.2329.2329.3	3	12.57	75700		(R)EELDAITKK(L)	(R)E E L D/A|I/T K K(L)		1046.57	0.0207	19.8
Group	Subgroup	Spectra	Distinct	Distinct	% AA	Total	Protein MW	Protein	Species	Database	Protein Name
(#)	(#)	(#)	Peptides	Summed	Coverage	Protein	(Da)	pI		Accession #
			(#)	MS/MS Search		Spectral
				Score		Intensity
7	7.1	1	1	12.14	1.7	468	118489	8.8	CAEEL	A0A0K3AV08
#	Filename	z	Score	Spectrum	Variable	Sequence	Sequence Map	Modifications	MH+	MH+	MH+
				Intensity	Sites			Map	Matched	Mass Shift	Error
									(Da)	(Da)	(ppm)
1	CSAKAZAKII48HC.3243.3243.4	4	12.14	468		(R)VKTYDQSSTGGTLPRLNER(Q)	(R)V K T Y D Q S S T/G|G T/L P R L/N E R(Q)		2122.09	0.0275	13
Group	Subgroup	Spectra	Distinct	Distinct	% AA	Total	Protein MW	Protein	Species	Database	Protein Name
(#)	(#)	(#)	Peptides	Summed	Coverage	Protein	(Da)	pI		Accession #
			(#)	MS/MS Search		Spectral
				Score		Intensity
8	8.1	2	1	11.89	2.9	45400	22641.4	9.43	CAEEL	Q19022
#	Filename	z	Score	Spectrum	Variable	Sequence	Sequence Map	Modifications	MH+	MH+	MH+
				Intensity	Sites			Map	Matched	Mass Shift	Error
									(Da)	(Da)	(ppm)
1	CSAKAZAKII48HB.3420.3431.2	2	11.89	23200		(K)VSKNGK(D)	(K)V/S|K/N G/K(D)		632.373	0.0026	4
2	CSAKAZAKII48HC.3408.3421.2	2	9.94	22200		(K)VSKNGK(D)	(K)V/S|K/N G/K(D)		632.373	0.003	4.8
Group	Subgroup	Spectra	Distinct	Distinct	% AA	Total	Protein MW	Protein	Species	Database	Protein Name
(#)	(#)	(#)	Peptides	Summed	Coverage	Protein	(Da)	pI		Accession #
			(#)	MS/MS Search		Spectral
				Score		Intensity
9	9.1	1	1	11.86	1.7	4530	59599	6.29	CAEEL	Q23487
#	Filename	z	Score	Spectrum	Variable	Sequence	Sequence Map	Modifications	MH+	MH+	MH+
				Intensity	Sites			Map	Matched	Mass Shift	Error
									(Da)	(Da)	(ppm)
1	CSAKAZAKII48HC.4163.4163.2	2	11.86	4530		(K)ITDIYPVPEK(V)	(K)I T|D I/Y P V/P E/K(V)		1174.63	0.0114	9.7
Group	Subgroup	Spectra	Distinct	Distinct	% AA	Total	Protein MW	Protein	Species	Database	Protein Name
(#)	(#)	(#)	Peptides	Summed	Coverage	Protein	(Da)	pI		Accession #
			(#)	MS/MS Search		Spectral
				Score		Intensity
10	10.1	2	1	11.68	2.8	71100	47695.2	5.03	CAEEL	O61882
#	Filename	z	Score	Spectrum	Variable	Sequence	Sequence Map	Modifications	MH+	MH+	MH+
				Intensity	Sites			Map	Matched	Mass Shift	Error
									(Da)	(Da)	(ppm)
1	CSAKAZAKII48HA.3364.3364.3	3	11.68	31900		(R)LQALSLSTESCR(N)	(R)L/Q A\L S\L|S T E S C R(N)	C:Carbamidomethylation	1364.68	0.0071	5.2
2	CSAKAZAKII48HB.3391.3391.3	3	10.25	39200		(R)LQALSLSTESCR(N)	(R)L/Q A\L S\L|S T E S C R(N)	C:Carbamidomethylation	1364.68	0.0043	3.1
Group	Subgroup	Spectra	Distinct	Distinct	% AA	Total	Protein MW	Protein	Species	Database	Protein Name
(#)	(#)	(#)	Peptides	Summed	Coverage	Protein	(Da)	pI		Accession #
			(#)	MS/MS Search		Spectral
				Score		Intensity
11	11.1	2	1	11.12	4.9	29400	29505.6	8.98	CAEEL	Q9N3Z0
#	Filename	z	Score	Spectrum	Variable	Sequence	Sequence Map	Modifications	MH+	MH+	MH+
				Intensity	Sites			Map	Matched	Mass Shift	Error
									(Da)	(Da)	(ppm)
1	CSAKAZAKII48HC.3653.3653.3	3	11.12	12100		(R)TPSQHSIHQSVR(F)	(R)T/P S Q H S|I|H Q/S V R(F)		1376.7	-0.0176	-12.8
2	CSAKAZAKII48HA.3678.3678.3	3	5.55	17300		(R)TPSQHSIHQSVR(F)	(R)T/P S Q H S|I|H Q S V R(F)		1376.7	-0.0118	-8.6
Group	Subgroup	Spectra	Distinct	Distinct	% AA	Total	Protein MW	Protein	Species	Database	Protein Name
(#)	(#)	(#)	Peptides	Summed	Coverage	Protein	(Da)	pI		Accession #
			(#)	MS/MS Search		Spectral
				Score		Intensity
12	12.1	2	2	11.05	0.6	20900	476776	5.81	CAEEL	Q19542
#	Filename	z	Score	Spectrum	Variable	Sequence	Sequence Map	Modifications	MH+	MH+	MH+
				Intensity	Sites			Map	Matched	Mass Shift	Error
									(Da)	(Da)	(ppm)
1	CSAKAZAKII48HA.3691.3691.3	3	5.61	17300		(K)TQSVPLNNDNFK(S)	(K)T|Q S V/P L\N\N|D N F K(S)		1376.68	0.0106	7.7
2	CSAKAZAKII48HC.4851.4851.3	3	5.44	3650		(R)ITNEIHKKVTALVK(Q)	(R)I T N E I/H/K K\V T A L V/K(Q)		1593.97	0.0173	10.8
Group	Subgroup	Spectra	Distinct	Distinct	% AA	Total	Protein MW	Protein	Species	Database	Protein Name
(#)	(#)	(#)	Peptides	Summed	Coverage	Protein	(Da)	pI		Accession #
			(#)	MS/MS Search		Spectral
				Score		Intensity
13	13.1	2	2	10.42	1.6	36000	130903	6.01	CAEEL	Q21049
#	Filename	z	Score	Spectrum	Variable	Sequence	Sequence Map	Modifications	MH+	MH+	MH+
				Intensity	Sites			Map	Matched	Mass Shift	Error
									(Da)	(Da)	(ppm)
1	CSAKAZAKII48HA.5345.5345.3	3	7.3	7760		(K)SLFEHHKALDEK(V)	(K)S L F|E H H K/A L/D E K(V)		1453.74	-0.0221	-15.2
2	CSAKAZAKII48HC.2267.2267.2	2	3.12	28300		(R)LRVAMER(V)	(R)L R/V A\M E R(V)		874.493	0.0034	3.9
Group	Subgroup	Spectra	Distinct	Distinct	% AA	Total	Protein MW	Protein	Species	Database	Protein Name
(#)	(#)	(#)	Peptides	Summed	Coverage	Protein	(Da)	pI		Accession #
			(#)	MS/MS Search		Spectral
				Score		Intensity
14	14.1	1	1	10.39	6.2	17100	22329.6	4.27	CAEEL	G5EFR2
#	Filename	z	Score	Spectrum	Variable	Sequence	Sequence Map	Modifications	MH+	MH+	MH+
				Intensity	Sites			Map	Matched	Mass Shift	Error
									(Da)	(Da)	(ppm)
1	CSAKAZAKII48HC.3902.3902.3	3	10.39	17100		(K)SNQFSSRVGRPR(G)	(K)S/N Q F/S S/R V\G/R P R(G)		1390.73	-0.0242	-17.4
Group	Subgroup	Spectra	Distinct	Distinct	% AA	Total	Protein MW	Protein	Species	Database	Protein Name
(#)	(#)	(#)	Peptides	Summed	Coverage	Protein	(Da)	pI		Accession #
			(#)	MS/MS Search		Spectral
				Score		Intensity
15	15.1	2	1	10.22	3	33200	52330.5	9.59	CAEEL	G8JYE5
#	Filename	z	Score	Spectrum	Variable	Sequence	Sequence Map	Modifications	MH+	MH+	MH+
				Intensity	Sites			Map	Matched	Mass Shift	Error
									(Da)	(Da)	(ppm)
1	CSAKAZAKII48HA.3961.3961.3	3	10.22	16600	M246m	(K)GKGPAKVTSAmAEK(M)	(K)G K G P A K|V T|S/A m A E\K(M)	m:Oxidized methionine	1374.74	15.9688	-18.8
2	CSAKAZAKII48HA.3952.3952.3	3	10.19	16600	M246m	(K)GKGPAKVTSAmAEK(M)	(K)G K G/P A K|V T|S A\m A E\K(M)	m:Oxidized methionine	1374.74	15.9688	-18.8
Group	Subgroup	Spectra	Distinct	Distinct	% AA	Total	Protein MW	Protein	Species	Database	Protein Name
(#)	(#)	(#)	Peptides	Summed	Coverage	Protein	(Da)	pI		Accession #
			(#)	MS/MS Search		Spectral
				Score		Intensity
16	16.1	2	1	10.22	8.3	9230	30985	4.73	CAEEL	Q9N522
#	Filename	z	Score	Spectrum	Variable	Sequence	Sequence Map	Modifications	MH+	MH+	MH+
				Intensity	Sites			Map	Matched	Mass Shift	Error
									(Da)	(Da)	(ppm)
1	CSAKAZAKII48HB.4847.4847.3	3	10.22	4750		(R)FSYGNITIERFEQSSESIVAFK(R)	(R)F S Y/G\N/I T I/E R F E Q S/S E S I V A F K(R)		2552.27	-0.0165	-6.5
2	CSAKAZAKII48HC.4827.4827.3	3	9.08	4490		(R)FSYGNITIERFEQSSESIVAFK(R)	(R)F S Y G N/I T I/E R/F E Q S S E S I V A F/K(R)		2552.27	-0.0239	-9.3
Group	Subgroup	Spectra	Distinct	Distinct	% AA	Total	Protein MW	Protein	Species	Database	Protein Name
(#)	(#)	(#)	Peptides	Summed	Coverage	Protein	(Da)	pI		Accession #
			(#)	MS/MS Search		Spectral
				Score		Intensity
17	17.1	2	1	10.19	3.2	177000	31791.1	9.38	CAEEL	G5EFI9
#	Filename	z	Score	Spectrum	Variable	Sequence	Sequence Map	Modifications	MH+	MH+	MH+
				Intensity	Sites			Map	Matched	Mass Shift	Error
									(Da)	(Da)	(ppm)
1	CSAKAZAKII48HA.2340.2340.3	3	10.19	97800		(R)AKMNIISNR(M)	(R)A K M/N I|I/S/N R(M)		1046.58	0.0152	14.5
2	CSAKAZAKII48HB.2371.2371.3	3	8.28	78900		(R)AKMNIISNR(M)	(R)A K M\N I|I/S|N/R(M)		1046.58	0.0146	13.9
Group	Subgroup	Spectra	Distinct	Distinct	% AA	Total	Protein MW	Protein	Species	Database	Protein Name
(#)	(#)	(#)	Peptides	Summed	Coverage	Protein	(Da)	pI		Accession #
			(#)	MS/MS Search		Spectral
				Score		Intensity
18	18.1	1	1	10.11	2.5	1830	66166.3	5.93	CAEEL	Q93794
#	Filename	z	Score	Spectrum	Variable	Sequence	Sequence Map	Modifications	MH+	MH+	MH+
				Intensity	Sites			Map	Matched	Mass Shift	Error
									(Da)	(Da)	(ppm)
1	CSAKAZAKII48HC.4066.4066.3	3	10.11	1830		(R)LCSTSTMLACAVGSR(N)	(R)L/C S T/S T M L/A C A/V/G S R(N)	C:Carbamidomethylation	1613.74	0.0001	0.1
Group	Subgroup	Spectra	Distinct	Distinct	% AA	Total	Protein MW	Protein	Species	Database	Protein Name
(#)	(#)	(#)	Peptides	Summed	Coverage	Protein	(Da)	pI		Accession #
			(#)	MS/MS Search		Spectral
				Score		Intensity
19	19.1	1	1	10.1	0.4	110000	179856	5.9	CAEEL	Q9XW25
#	Filename	z	Score	Spectrum	Variable	Sequence	Sequence Map	Modifications	MH+	MH+	MH+
				Intensity	Sites			Map	Matched	Mass Shift	Error
									(Da)	(Da)	(ppm)
1	CSAKAZAKII48HC.1953.2012.2	2	10.1	110000		(K)IENSSKTK(K)	(K)I E|N S S K/T/K(K)		906.489	0.0137	15.1
Group	Subgroup	Spectra	Distinct	Distinct	% AA	Total	Protein MW	Protein	Species	Database	Protein Name
(#)	(#)	(#)	Peptides	Summed	Coverage	Protein	(Da)	pI		Accession #
			(#)	MS/MS Search		Spectral
				Score		Intensity
20	20.1	1	1	9.95	2.5	75700	40667.8	7.83	CAEEL	O62116
#	Filename	z	Score	Spectrum	Variable	Sequence	Sequence Map	Modifications	MH+	MH+	MH+
				Intensity	Sites			Map	Matched	Mass Shift	Error
									(Da)	(Da)	(ppm)
1	CSAKAZAKII48HC.2325.2325.3	3	9.95	75700	M75m	(K)AGmKLELIR(K)	(K)A G\m/K/L/E L I/R(K)	m:Oxidized methionine	1030.61	15.9858	-8.8
Group	Subgroup	Spectra	Distinct	Distinct	% AA	Total	Protein MW	Protein	Species	Database	Protein Name
(#)	(#)	(#)	Peptides	Summed	Coverage	Protein	(Da)	pI		Accession #
			(#)	MS/MS Search		Spectral
				Score		Intensity
21	21.1	1	1	9.94	0.1	22800	461741	5.2	CAEEL	H2L075
#	Filename	z	Score	Spectrum	Variable	Sequence	Sequence Map	Modifications	MH+	MH+	MH+
				Intensity	Sites			Map	Matched	Mass Shift	Error
									(Da)	(Da)	(ppm)
1	CSAKAZAKII48HA.3425.3434.2	2	9.94	22800		(R)VSWLK(D)	(R)V/S|W/L/K(D)		632.377	-0.0011	-1.7
Group	Subgroup	Spectra	Distinct	Distinct	% AA	Total	Protein MW	Protein	Species	Database	Protein Name
(#)	(#)	(#)	Peptides	Summed	Coverage	Protein	(Da)	pI		Accession #
			(#)	MS/MS Search		Spectral
				Score		Intensity
22	22.1	1	1	9.9	1.3	3450	49975.6	8.92	CAEEL	Q23571
#	Filename	z	Score	Spectrum	Variable	Sequence	Sequence Map	Modifications	MH+	MH+	MH+
				Intensity	Sites			Map	Matched	Mass Shift	Error
									(Da)	(Da)	(ppm)
1	CSAKAZAKII48HA.2636.2636.2	2	9.9	3450		(R)IAIENK(I)	(R)I/A|I/E/N K(I)		687.404	-0.0014	-2.1
Group	Subgroup	Spectra	Distinct	Distinct	% AA	Total	Protein MW	Protein	Species	Database	Protein Name
(#)	(#)	(#)	Peptides	Summed	Coverage	Protein	(Da)	pI		Accession #
			(#)	MS/MS Search		Spectral
				Score		Intensity
23	23.1	1	1	9.86	4.2	7680	30135.3	9	CAEEL	Q94165
#	Filename	z	Score	Spectrum	Variable	Sequence	Sequence Map	Modifications	MH+	MH+	MH+
				Intensity	Sites			Map	Matched	Mass Shift	Error
									(Da)	(Da)	(ppm)
1	CSAKAZAKII48HC.3340.3340.3	3	9.86	7680		(K)DRELGAVCKYR(I)	(K)D/R E L G A V/C K Y R(I)	C:Carbamidomethylation	1366.69	-0.0114	-8.3
Group	Subgroup	Spectra	Distinct	Distinct	% AA	Total	Protein MW	Protein	Species	Database	Protein Name
(#)	(#)	(#)	Peptides	Summed	Coverage	Protein	(Da)	pI		Accession #
			(#)	MS/MS Search		Spectral
				Score		Intensity
24	24.1	1	1	9.77	0.9	97800	110510	5.89	CAEEL	Q9N3Q5
#	Filename	z	Score	Spectrum	Variable	Sequence	Sequence Map	Modifications	MH+	MH+	MH+
				Intensity	Sites			Map	Matched	Mass Shift	Error
									(Da)	(Da)	(ppm)
1	CSAKAZAKII48HA.2336.2336.3	3	9.77	97800		(R)HHTLKVPSK(F)	(R)H H/T\L/K\V P/S K(F)		1046.61	-0.0179	-17.1
Group	Subgroup	Spectra	Distinct	Distinct	% AA	Total	Protein MW	Protein	Species	Database	Protein Name
(#)	(#)	(#)	Peptides	Summed	Coverage	Protein	(Da)	pI		Accession #
			(#)	MS/MS Search		Spectral
				Score		Intensity
25	25.1	5	1	9.71	2.7	318000	74997.9	8.26	CAEEL	O62139
#	Filename	z	Score	Spectrum	Variable	Sequence	Sequence Map	Modifications	MH+	MH+	MH+
				Intensity	Sites			Map	Matched	Mass Shift	Error
									(Da)	(Da)	(ppm)
1	CSAKAZAKII48HB.3996.4030.3	3	9.71	59900	M65m	(K)IPELADTQPFPFmDRLEK(I)	(K)I P/E L/A D T Q P F P|F m D R L E K(I)	m:Oxidized methionine	2147.08	15.9661	-13.3
2	CSAKAZAKII48HB.4055.4055.3	3	9.6	59900	M65m	(K)IPELADTQPFPFmDRLEK(I)	(K)I P/E L/A D T Q P F P|F m D R L E K(I)	m:Oxidized methionine	2147.08	15.9651	-13.8
3	CSAKAZAKII48HC.3989.4009.3	3	8.75	66200	M65m	(K)IPELADTQPFPFmDRLEK(I)	(K)I P/E L/A D T Q P F P|F m D R L E K(I)	m:Oxidized methionine	2147.08	15.9659	-13.4
4	CSAKAZAKII48HC.4032.4032.3	3	8.2	66200	M65m	(K)IPELADTQPFPFmDRLEK(I)	(K)I P/E L/A D T Q P F P|F m D R L E K(I)	m:Oxidized methionine	2147.08	15.9659	-13.4
5	CSAKAZAKII48HA.4016.4037.3	3	7.98	65900	M65m	(K)IPELADTQPFPFmDRLEK(I)	(K)I P/E L/A D T Q P F P|F m D R L E K(I)	m:Oxidized methionine	2147.08	15.9655	-13.6
Group	Subgroup	Spectra	Distinct	Distinct	% AA	Total	Protein MW	Protein	Species	Database	Protein Name
(#)	(#)	(#)	Peptides	Summed	Coverage	Protein	(Da)	pI		Accession #
			(#)	MS/MS Search		Spectral
				Score		Intensity
26	26.1	3	1	9.62	1.3	63900	87806	9.84	CAEEL	Q11188
#	Filename	z	Score	Spectrum	Variable	Sequence	Sequence Map	Modifications	MH+	MH+	MH+
				Intensity	Sites			Map	Matched	Mass Shift	Error
									(Da)	(Da)	(ppm)
1	CSAKAZAKII48HC.3406.3417.2	2	9.62	19100		(R)DEYAAHLESK(A)	(R)D E Y A/A H/L E|S|K(A)		1162.54	-0.0068	-5.8
2	CSAKAZAKII48HB.3415.3425.2	2	9.44	22400		(R)DEYAAHLESK(A)	(R)D E Y\A/A H/L E|S|K(A)		1162.54	-0.0088	-7.6
3	CSAKAZAKII48HB.3432.3432.2	2	1.87	22400		(R)DEYAAHLESK(A)	(R)D E Y A A H L E|S|K(A)		1162.54	-0.0088	-7.6
Group	Subgroup	Spectra	Distinct	Distinct	% AA	Total	Protein MW	Protein	Species	Database	Protein Name
(#)	(#)	(#)	Peptides	Summed	Coverage	Protein	(Da)	pI		Accession #
			(#)	MS/MS Search		Spectral
				Score		Intensity
27	27.1	2	1	9.36	2.5	5410	47543.9	9.37	CAEEL	G8JY74
#	Filename	z	Score	Spectrum	Variable	Sequence	Sequence Map	Modifications	MH+	MH+	MH+
				Intensity	Sites			Map	Matched	Mass Shift	Error
									(Da)	(Da)	(ppm)
1	CSAKAZAKII48HC.3361.3361.2	2	9.36	2700		(K)IGGIGTVPVGR(V)	(K)I/G|G|I|G/T\V/P V G R(V)		1025.61	-0.0016	-1.6
2	CSAKAZAKII48HC.3374.3374.2	2	4.79	2700		(K)IGGIGTVPVGR(V)	(K)I G|G\I|G T/V/P V G R(V)		1025.61	-0.0016	-1.6
Group	Subgroup	Spectra	Distinct	Distinct	% AA	Total	Protein MW	Protein	Species	Database	Protein Name
(#)	(#)	(#)	Peptides	Summed	Coverage	Protein	(Da)	pI		Accession #
			(#)	MS/MS Search		Spectral
				Score		Intensity
28	28.1	4	1	9.36	1.8	141000	78385	9.23	CAEEL	Q8MNV7
#	Filename	z	Score	Spectrum	Variable	Sequence	Sequence Map	Modifications	MH+	MH+	MH+
				Intensity	Sites			Map	Matched	Mass Shift	Error
									(Da)	(Da)	(ppm)
1	CSAKAZAKII48HC.4346.4369.2	2	9.36	40400		(K)YRTIIFDESHMLK(D)	(K)Y R T/I I/F D/E S H M/L/K(D)		1652.85	-0.0205	-12.4
2	CSAKAZAKII48HB.4368.4368.3	3	8.77	15500		(K)YRTIIFDESHMLK(D)	(K)Y R T/I I|F D/E S/H M/L/K(D)		1652.85	-0.0203	-12.3
3	CSAKAZAKII48HA.4357.4391.2	2	8.32	42500		(K)YRTIIFDESHMLK(D)	(K)Y R T/I I/F D/E S H M/L/K(D)		1652.85	-0.0207	-12.5
4	CSAKAZAKII48HA.4442.4442.2	2	4.69	42500		(K)YRTIIFDESHMLK(D)	(K)Y R T/I I/F D E/S H\M/L/K(D)		1652.85	-0.0207	-12.5
Group	Subgroup	Spectra	Distinct	Distinct	% AA	Total	Protein MW	Protein	Species	Database	Protein Name
(#)	(#)	(#)	Peptides	Summed	Coverage	Protein	(Da)	pI		Accession #
			(#)	MS/MS Search		Spectral
				Score		Intensity
29	29.1	1	1	9.35	1.4	131000	111952	9.36	CAEEL	Q9GYL4
#	Filename	z	Score	Spectrum	Variable	Sequence	Sequence Map	Modifications	MH+	MH+	MH+
				Intensity	Sites			Map	Matched	Mass Shift	Error
									(Da)	(Da)	(ppm)
1	CSAKAZAKII48HB.5341.5341.3	3	9.35	131000		(R)GSHGAPRSRNSNGR(Q)	(R)G S H/G/A P R S R N S/N G R(Q)		1452.72	0.0022	1.5
Group	Subgroup	Spectra	Distinct	Distinct	% AA	Total	Protein MW	Protein	Species	Database	Protein Name
(#)	(#)	(#)	Peptides	Summed	Coverage	Protein	(Da)	pI		Accession #
			(#)	MS/MS Search		Spectral
				Score		Intensity
30	30.1	3	1	9.25	2.8	765000	36175.7	8.5	CAEEL	O62515
#	Filename	z	Score	Spectrum	Variable	Sequence	Sequence Map	Modifications	MH+	MH+	MH+
				Intensity	Sites			Map	Matched	Mass Shift	Error
									(Da)	(Da)	(ppm)
1	CSAKAZAKII48HC.2939.2976.2	2	9.25	246000		(K)APENMTVMK(D)	(K)A/P|E N M T V M/K(D)		1020.49	0.0155	15.2
2	CSAKAZAKII48HB.2951.2994.2	2	6.81	242000		(K)APENMTVMK(D)	(K)A/P|E N M T V M K(D)		1020.49	0.0151	14.8
3	CSAKAZAKII48HA.2962.2998.2	2	4.79	277000		(K)APENMTVMK(D)	(K)A/P|E N M T V M K(D)		1020.49	0.0165	16.2
Group	Subgroup	Spectra	Distinct	Distinct	% AA	Total	Protein MW	Protein	Species	Database	Protein Name
(#)	(#)	(#)	Peptides	Summed	Coverage	Protein	(Da)	pI		Accession #
			(#)	MS/MS Search		Spectral
				Score		Intensity
31	31.1	1	1	9	0.8	65900	270128	5.65	CAEEL	G5EGK6
#	Filename	z	Score	Spectrum	Variable	Sequence	Sequence Map	Modifications	MH+	MH+	MH+
				Intensity	Sites			Map	Matched	Mass Shift	Error
									(Da)	(Da)	(ppm)
1	CSAKAZAKII48HA.4089.4089.3	3	9	65900	M2109m	(K)EEERQRLAAATAAATmATQK(A)	(K)E E E R/Q R\L A A A T A/A A T/m A T Q K(A)	m:Oxidized methionine	2147.09	15.9623	-15.1
Group	Subgroup	Spectra	Distinct	Distinct	% AA	Total	Protein MW	Protein	Species	Database	Protein Name
(#)	(#)	(#)	Peptides	Summed	Coverage	Protein	(Da)	pI		Accession #
			(#)	MS/MS Search		Spectral
				Score		Intensity
32	32.1	3	1	8.96	1.5	817000	55695.2	11.42	CAEEL	Q09633
#	Filename	z	Score	Spectrum	Variable	Sequence	Sequence Map	Modifications	MH+	MH+	MH+
				Intensity	Sites			Map	Matched	Mass Shift	Error
									(Da)	(Da)	(ppm)
1	CSAKAZAKII48HC.2136.2179.2	2	8.96	292000		(R)SASTARGR(S)	(R)S/A|S T/A R G/R(S)		805.428	-0.0125	-15.5
2	CSAKAZAKII48HA.2150.2191.2	2	8.7	262000		(R)SASTARGR(S)	(R)S A|S T/A R G/R(S)		805.428	-0.0127	-15.7
3	CSAKAZAKII48HA.2221.2221.2	2	7.18	262000		(R)SASTARGR(S)	(R)S A|S T/A/R G R(S)		805.428	-0.0124	-15.5
Group	Subgroup	Spectra	Distinct	Distinct	% AA	Total	Protein MW	Protein	Species	Database	Protein Name
(#)	(#)	(#)	Peptides	Summed	Coverage	Protein	(Da)	pI		Accession #
			(#)	MS/MS Search		Spectral
				Score		Intensity
33	33.1	3	1	8.94	3.5	697000	16407.1	7.92	CAEEL	Q9N3I5
#	Filename	z	Score	Spectrum	Variable	Sequence	Sequence Map	Modifications	MH+	MH+	MH+
				Intensity	Sites			Map	Matched	Mass Shift	Error
									(Da)	(Da)	(ppm)
1	CSAKAZAKII48HC.2361.2435.2	2	8.94	246000		(K)SIEKY(-)	(K)S/I|E K Y(-)		639.335	0.0104	16.3
2	CSAKAZAKII48HB.2374.2442.2	2	8.88	232000		(K)SIEKY(-)	(K)S/I|E K Y(-)		639.335	0.01	15.7
3	CSAKAZAKII48HA.2382.2440.2	2	8.45	218000		(K)SIEKY(-)	(K)S/I|E K Y(-)		639.335	0.0099	15.4
Group	Subgroup	Spectra	Distinct	Distinct	% AA	Total	Protein MW	Protein	Species	Database	Protein Name
(#)	(#)	(#)	Peptides	Summed	Coverage	Protein	(Da)	pI		Accession #
			(#)	MS/MS Search		Spectral
				Score		Intensity
34	34.1	1	1	8.91	3.2	27000	43187.7	9.08	CAEEL	P91501
#	Filename	z	Score	Spectrum	Variable	Sequence	Sequence Map	Modifications	MH+	MH+	MH+
				Intensity	Sites			Map	Matched	Mass Shift	Error
									(Da)	(Da)	(ppm)
1	CSAKAZAKII48HA.3792.3792.3	3	8.91	27000		(K)LIVKTMNDDEGK(G)	(K)L/I/V K T M N D|D E G K(G)		1362.69	-0.0205	-15
Group	Subgroup	Spectra	Distinct	Distinct	% AA	Total	Protein MW	Protein	Species	Database	Protein Name
(#)	(#)	(#)	Peptides	Summed	Coverage	Protein	(Da)	pI		Accession #
			(#)	MS/MS Search		Spectral
				Score		Intensity
35	35.1	2	2	8.87	3.3	20300	93067.2	5.18	CAEEL	O62505
#	Filename	z	Score	Spectrum	Variable	Sequence	Sequence Map	Modifications	MH+	MH+	MH+
				Intensity	Sites			Map	Matched	Mass Shift	Error
									(Da)	(Da)	(ppm)
1	CSAKAZAKII48HC.2690.2690.3	3	5.2	1320	M473m	(K)WCSHIEDQVLLmYNR(V)	(K)W C S H I E\D Q V L/L/m/Y N R(V)	C:Carbamidomethylation	1963.91	15.9603	-17.5
								m:Oxidized methionine
2	CSAKAZAKII48HB.3873.3873.2	2	3.67	19000		(K)CREFCTYDHNLK(D)	(K)C R E F C T Y D|H N L/K(D)	C:Carbamidomethylation	1642.71	0.0203	12.4
Group	Subgroup	Spectra	Distinct	Distinct	% AA	Total	Protein MW	Protein	Species	Database	Protein Name
(#)	(#)	(#)	Peptides	Summed	Coverage	Protein	(Da)	pI		Accession #
			(#)	MS/MS Search		Spectral
				Score		Intensity
36	36.1	1	1	8.67	1.6	14000	43108.5	6.16	CAEEL	H2L0L6
#	Filename	z	Score	Spectrum	Variable	Sequence	Sequence Map	Modifications	MH+	MH+	MH+
				Intensity	Sites			Map	Matched	Mass Shift	Error
									(Da)	(Da)	(ppm)
1	CSAKAZAKII48HC.2381.2390.2	2	8.67	14000		(K)GENQSK(C)	(K)G/E\N\Q S/K(C)		662.31	0.0131	19.8
Group	Subgroup	Spectra	Distinct	Distinct	% AA	Total	Protein MW	Protein	Species	Database	Protein Name
(#)	(#)	(#)	Peptides	Summed	Coverage	Protein	(Da)	pI		Accession #
			(#)	MS/MS Search		Spectral
				Score		Intensity
37	37.1	1	1	8.6	1.5	78900	62439.7	9.54	CAEEL	Q19893
#	Filename	z	Score	Spectrum	Variable	Sequence	Sequence Map	Modifications	MH+	MH+	MH+
				Intensity	Sites			Map	Matched	Mass Shift	Error
									(Da)	(Da)	(ppm)
1	CSAKAZAKII48HB.2330.2330.3	3	8.6	78900		(R)LFPMRINR(K)	(R)L/F/P M|R I/N R(K)		1046.59	0.0001	0.1
Group	Subgroup	Spectra	Distinct	Distinct	% AA	Total	Protein MW	Protein	Species	Database	Protein Name
(#)	(#)	(#)	Peptides	Summed	Coverage	Protein	(Da)	pI		Accession #
			(#)	MS/MS Search		Spectral
				Score		Intensity
38	38.1	3	1	8.57	2.2	295000	39478.2	6.48	CAEEL	G5EGG8
#	Filename	z	Score	Spectrum	Variable	Sequence	Sequence Map	Modifications	MH+	MH+	MH+
				Intensity	Sites			Map	Matched	Mass Shift	Error
									(Da)	(Da)	(ppm)
1	CSAKAZAKII48HB.2141.2141.2	2	8.57	92300		(R)TGSASLDR(L)	(R)T G|S A/S L D/R(L)		806.4	-0.0009	-1.1
2	CSAKAZAKII48HC.2134.2134.2	2	6.97	110000		(R)TGSASLDR(L)	(R)T\G|S A/S L D R(L)		806.4	-0.0012	-1.5
3	CSAKAZAKII48HB.2272.2272.2	2	6.58	92300		(R)TGSASLDR(L)	(R)T G|S/A S L D R(L)		806.4	-0.0009	-1.1
Group	Subgroup	Spectra	Distinct	Distinct	% AA	Total	Protein MW	Protein	Species	Database	Protein Name
(#)	(#)	(#)	Peptides	Summed	Coverage	Protein	(Da)	pI		Accession #
			(#)	MS/MS Search		Spectral
				Score		Intensity
39	39.1	1	1	8.53	2.8	23500	68832.6	5.78	CAEEL	Q19266
#	Filename	z	Score	Spectrum	Variable	Sequence	Sequence Map	Modifications	MH+	MH+	MH+
				Intensity	Sites			Map	Matched	Mass Shift	Error
									(Da)	(Da)	(ppm)
1	CSAKAZAKII48HB.4122.4122.3	3	8.53	23500	M516m	(K)LDINEGLRDmKEHQFFR(G)	(K)L D I\N/E G/L R D m\K E H/Q F F R(G)	m:Oxidized methionine	2148.07	15.9707	-11.2
Group	Subgroup	Spectra	Distinct	Distinct	% AA	Total	Protein MW	Protein	Species	Database	Protein Name
(#)	(#)	(#)	Peptides	Summed	Coverage	Protein	(Da)	pI		Accession #
			(#)	MS/MS Search		Spectral
				Score		Intensity
40	40.1	1	1	8.46	3.4	2310	73969.4	5.3	CAEEL	Q93534
#	Filename	z	Score	Spectrum	Variable	Sequence	Sequence Map	Modifications	MH+	MH+	MH+
				Intensity	Sites			Map	Matched	Mass Shift	Error
									(Da)	(Da)	(ppm)
1	CSAKAZAKII48HB.4772.4772.3	3	8.46	2310	M430m	(K)KLHDCIGQHNRWELIAmHSEDR(C)	(K)K L H D C I G Q H N R W E/L/I/A m H S/E D R(C)	C:Carbamidomethylation	2745.31	15.9679	-9.8
								m:Oxidized methionine
Group	Subgroup	Spectra	Distinct	Distinct	% AA	Total	Protein MW	Protein	Species	Database	Protein Name
(#)	(#)	(#)	Peptides	Summed	Coverage	Protein	(Da)	pI		Accession #
			(#)	MS/MS Search		Spectral
				Score		Intensity
41	41.1	1	1	8.27	1	3470	172524	4.59	CAEEL	P17139
#	Filename	z	Score	Spectrum	Variable	Sequence	Sequence Map	Modifications	MH+	MH+	MH+
				Intensity	Sites			Map	Matched	Mass Shift	Error
									(Da)	(Da)	(ppm)
1	CSAKAZAKII48HA.4381.4381.3	3	8.27	3470		(K)GSQGEQGLGGTPGYPGTK(G)	(K)G S Q G E Q G/L G G T P\G Y P G T/K(G)		1690.8	-0.0263	-15.5
Group	Subgroup	Spectra	Distinct	Distinct	% AA	Total	Protein MW	Protein	Species	Database	Protein Name
(#)	(#)	(#)	Peptides	Summed	Coverage	Protein	(Da)	pI		Accession #
			(#)	MS/MS Search		Spectral
				Score		Intensity
42	42.1	1	1	8.23	3.7	8580	33426.1	10.11	CAEEL	P34680
#	Filename	z	Score	Spectrum	Variable	Sequence	Sequence Map	Modifications	MH+	MH+	MH+
				Intensity	Sites			Map	Matched	Mass Shift	Error
									(Da)	(Da)	(ppm)
1	CSAKAZAKII48HB.4495.4495.2	2	8.23	8580	M97m	(R)ALLLCAmGISR(S)	(R)A L L/L C A/m G/I/S R(S)	C:Carbamidomethylation	1204.65	15.9934	-1.2
								m:Oxidized methionine
Group	Subgroup	Spectra	Distinct	Distinct	% AA	Total	Protein MW	Protein	Species	Database	Protein Name
(#)	(#)	(#)	Peptides	Summed	Coverage	Protein	(Da)	pI		Accession #
			(#)	MS/MS Search		Spectral
				Score		Intensity
43	43.1	1	1	8.21	1.4	16000	48350.7	6.79	CAEEL	A0A061AKU6
#	Filename	z	Score	Spectrum	Variable	Sequence	Sequence Map	Modifications	MH+	MH+	MH+
				Intensity	Sites			Map	Matched	Mass Shift	Error
									(Da)	(Da)	(ppm)
1	CSAKAZAKII48HB.2392.2401.2	2	8.21	16000		(K)TEGLDK(I)	(K)T\E/G/L\D/K(I)		662.336	-0.0104	-15.7
Group	Subgroup	Spectra	Distinct	Distinct	% AA	Total	Protein MW	Protein	Species	Database	Protein Name
(#)	(#)	(#)	Peptides	Summed	Coverage	Protein	(Da)	pI		Accession #
			(#)	MS/MS Search		Spectral
				Score		Intensity
44	44.1	2	1	8.11	1	52400	100486	4.58	CAEEL	A0A1I6CMA1
#	Filename	z	Score	Spectrum	Variable	Sequence	Sequence Map	Modifications	MH+	MH+	MH+
				Intensity	Sites			Map	Matched	Mass Shift	Error
									(Da)	(Da)	(ppm)
1	CSAKAZAKII48HA.2337.2343.2	2	8.11	26200		(K)LKSQEDAKK(K)	(K)L/K|S/Q E D A K K(K)		1046.58	0.0103	9.8
2	CSAKAZAKII48HA.2341.2341.2	2	6.96	26200		(K)LKSQEDAKK(K)	(K)L/K|S/Q E/D A/K K(K)		1046.58	0.0103	9.8
Group	Subgroup	Spectra	Distinct	Distinct	% AA	Total	Protein MW	Protein	Species	Database	Protein Name
(#)	(#)	(#)	Peptides	Summed	Coverage	Protein	(Da)	pI		Accession #
			(#)	MS/MS Search		Spectral
				Score		Intensity
45	45.1	1	1	8.05	0.6	75700	182575	8.95	CAEEL	Q9U263
#	Filename	z	Score	Spectrum	Variable	Sequence	Sequence Map	Modifications	MH+	MH+	MH+
				Intensity	Sites			Map	Matched	Mass Shift	Error
									(Da)	(Da)	(ppm)
1	CSAKAZAKII48HC.2320.2320.3	3	8.05	75700		(K)SSATGKTPVAK(R)	(K)S S A/T G/K T\P/V A K(R)		1046.58	0.0095	9
Group	Subgroup	Spectra	Distinct	Distinct	% AA	Total	Protein MW	Protein	Species	Database	Protein Name
(#)	(#)	(#)	Peptides	Summed	Coverage	Protein	(Da)	pI		Accession #
			(#)	MS/MS Search		Spectral
				Score		Intensity
46	46.1	4	1	8.01	0.9	1070000	91269.8	9.37	CAEEL	O61794
#	Filename	z	Score	Spectrum	Variable	Sequence	Sequence Map	Modifications	MH+	MH+	MH+
				Intensity	Sites			Map	Matched	Mass Shift	Error
									(Da)	(Da)	(ppm)
1	CSAKAZAKII48HB.2144.2194.2	2	8.01	256000		(K)ASVNASEK(D)	(K)A S|V N/A S E K(D)		805.405	0.0104	12.9
2	CSAKAZAKII48HA.2218.2218.2	2	7.23	262000		(K)ASVNASEK(D)	(K)A S|V N/A S E K(D)		805.405	0.01	12.4
3	CSAKAZAKII48HB.2219.2219.2	2	6.43	256000		(K)ASVNASEK(D)	(K)A S|V N/A S E K(D)		805.405	0.0096	11.9
4	CSAKAZAKII48HC.2206.2206.2	2	4.46	292000		(K)ASVNASEK(D)	(K)A S|V N/A S E K(D)		805.405	0.0089	11.1
Group	Subgroup	Spectra	Distinct	Distinct	% AA	Total	Protein MW	Protein	Species	Database	Protein Name
(#)	(#)	(#)	Peptides	Summed	Coverage	Protein	(Da)	pI		Accession #
			(#)	MS/MS Search		Spectral
				Score		Intensity
47	47.1	1	1	7.99	5	17100	30302.5	6.95	CAEEL	Q9XX63
#	Filename	z	Score	Spectrum	Variable	Sequence	Sequence Map	Modifications	MH+	MH+	MH+
				Intensity	Sites			Map	Matched	Mass Shift	Error
									(Da)	(Da)	(ppm)
1	CSAKAZAKII48HC.3920.3920.3	3	7.99	17100		(R)LKAPKMSSNGSDR(V)	(R)L K/A|P K M S S N G\S D R(V)		1390.71	-0.0051	-3.7
Group	Subgroup	Spectra	Distinct	Distinct	% AA	Total	Protein MW	Protein	Species	Database	Protein Name
(#)	(#)	(#)	Peptides	Summed	Coverage	Protein	(Da)	pI		Accession #
			(#)	MS/MS Search		Spectral
				Score		Intensity
48	48.1	1	1	7.91	4.7	3700	43646.1	9.7	CAEEL	H2KZT2
#	Filename	z	Score	Spectrum	Variable	Sequence	Sequence Map	Modifications	MH+	MH+	MH+
				Intensity	Sites			Map	Matched	Mass Shift	Error
									(Da)	(Da)	(ppm)
1	CSAKAZAKII48HC.3626.3626.4	4	7.91	3700	M131m	(R)VSAWYGVmMALMRLLIVK(F)	(R)V S/A W Y G V m M/A L/M/R L/L I V K(F)	m:Oxidized methionine	2081.15	15.9542	-19.4
Group	Subgroup	Spectra	Distinct	Distinct	% AA	Total	Protein MW	Protein	Species	Database	Protein Name
(#)	(#)	(#)	Peptides	Summed	Coverage	Protein	(Da)	pI		Accession #
			(#)	MS/MS Search		Spectral
				Score		Intensity
49	49.1	1	1	7.89	2.1	17100	69651.3	6.57	CAEEL	G5EFL1
#	Filename	z	Score	Spectrum	Variable	Sequence	Sequence Map	Modifications	MH+	MH+	MH+
				Intensity	Sites			Map	Matched	Mass Shift	Error
									(Da)	(Da)	(ppm)
1	CSAKAZAKII48HC.3884.3884.3	3	7.89	17100		(K)GGISQRALDSMQK(E)	(K)G G I S/Q R A L/D S M Q K(E)		1390.71	-0.0051	-3.7
Group	Subgroup	Spectra	Distinct	Distinct	% AA	Total	Protein MW	Protein	Species	Database	Protein Name
(#)	(#)	(#)	Peptides	Summed	Coverage	Protein	(Da)	pI		Accession #
			(#)	MS/MS Search		Spectral
				Score		Intensity
50	50.1	1	1	7.81	4.6	885	32018.6	5.78	CAEEL	A0A131MBE3
#	Filename	z	Score	Spectrum	Variable	Sequence	Sequence Map	Modifications	MH+	MH+	MH+
				Intensity	Sites			Map	Matched	Mass Shift	Error
									(Da)	(Da)	(ppm)
1	CSAKAZAKII48HB.3629.3629.3	3	7.81	885		(K)FYVLRKYLAAQSK(Y)	(K)F Y/V L/R K Y L/A A/Q S K(Y)		1586.9	-0.0123	-7.7
Group	Subgroup	Spectra	Distinct	Distinct	% AA	Total	Protein MW	Protein	Species	Database	Protein Name
(#)	(#)	(#)	Peptides	Summed	Coverage	Protein	(Da)	pI		Accession #
			(#)	MS/MS Search		Spectral
				Score		Intensity
51	51.1	1	1	7.81	1.7	14800	85072.4	8.52	CAEEL	G5EEA7
#	Filename	z	Score	Spectrum	Variable	Sequence	Sequence Map	Modifications	MH+	MH+	MH+
				Intensity	Sites			Map	Matched	Mass Shift	Error
									(Da)	(Da)	(ppm)
1	CSAKAZAKII48HA.4375.4375.3	3	7.81	14800		(R)RFYEPFTSFFALK(L)	(R)R/F Y E P|F T S F F A/L/K(L)		1652.85	-0.0143	-8.7
Group	Subgroup	Spectra	Distinct	Distinct	% AA	Total	Protein MW	Protein	Species	Database	Protein Name
(#)	(#)	(#)	Peptides	Summed	Coverage	Protein	(Da)	pI		Accession #
			(#)	MS/MS Search		Spectral
				Score		Intensity
52	52.1	1	1	7.71	3.2	4750	75979.5	9.98	CAEEL	Q8I4G4
#	Filename	z	Score	Spectrum	Variable	Sequence	Sequence Map	Modifications	MH+	MH+	MH+
				Intensity	Sites			Map	Matched	Mass Shift	Error
									(Da)	(Da)	(ppm)
1	CSAKAZAKII48HB.4858.4858.3	3	7.71	4750	M156m	(R)NFDHELLADGGRRmSMAYLPSR(E)	(R)N F D H/E L/L A D/G G R R m S/M/A Y L P S R(E)	m:Oxidized methionine	2536.22	16.0318	14.5
Group	Subgroup	Spectra	Distinct	Distinct	% AA	Total	Protein MW	Protein	Species	Database	Protein Name
(#)	(#)	(#)	Peptides	Summed	Coverage	Protein	(Da)	pI		Accession #
			(#)	MS/MS Search		Spectral
				Score		Intensity
53	53.1	1	1	7.7	8.4	6020	14233.5	12.07	CAEEL	I7LHV7
#	Filename	z	Score	Spectrum	Variable	Sequence	Sequence Map	Modifications	MH+	MH+	MH+
				Intensity	Sites			Map	Matched	Mass Shift	Error
									(Da)	(Da)	(ppm)
1	CSAKAZAKII48HA.3321.3321.3	3	7.7	6020	M64m	(K)VHFmSGTGRR(S)	(K)V/H F/m S G/T G R R(S)	m:Oxidized methionine	1147.58	15.9836	-9.7
Group	Subgroup	Spectra	Distinct	Distinct	% AA	Total	Protein MW	Protein	Species	Database	Protein Name
(#)	(#)	(#)	Peptides	Summed	Coverage	Protein	(Da)	pI		Accession #
			(#)	MS/MS Search		Spectral
				Score		Intensity
54	54.1	1	1	7.7	3.9	17900	42523.7	10.31	CAEEL	Q7YXB5
#	Filename	z	Score	Spectrum	Variable	Sequence	Sequence Map	Modifications	MH+	MH+	MH+
				Intensity	Sites			Map	Matched	Mass Shift	Error
									(Da)	(Da)	(ppm)
1	CSAKAZAKII48HC.4347.4347.3	3	7.7	17900		(R)TSPRYNLSTCVVQK(S)	(R)T S/P R\Y/N L S T\C V V Q/K(S)	C:Carbamidomethylation	1652.84	-0.0121	-7.3
Group	Subgroup	Spectra	Distinct	Distinct	% AA	Total	Protein MW	Protein	Species	Database	Protein Name
(#)	(#)	(#)	Peptides	Summed	Coverage	Protein	(Da)	pI		Accession #
			(#)	MS/MS Search		Spectral
				Score		Intensity
55	55.1	1	1	7.61	3.5	16600	36553	7.81	CAEEL	P04970
#	Filename	z	Score	Spectrum	Variable	Sequence	Sequence Map	Modifications	MH+	MH+	MH+
				Intensity	Sites			Map	Matched	Mass Shift	Error
									(Da)	(Da)	(ppm)
1	CSAKAZAKII48HA.3909.3909.3	3	7.61	16600	M261m	(R)LEKPASmDDIKK(V)	(R)L/E/K/P A|S|m D D I K K(V)	m:Oxidized methionine	1374.73	15.9801	-10.7
Group	Subgroup	Spectra	Distinct	Distinct	% AA	Total	Protein MW	Protein	Species	Database	Protein Name
(#)	(#)	(#)	Peptides	Summed	Coverage	Protein	(Da)	pI		Accession #
			(#)	MS/MS Search		Spectral
				Score		Intensity
56	56.1	1	1	7.52	16.9	16500	6560.2	10.93	CAEEL	H2KML2
#	Filename	z	Score	Spectrum	Variable	Sequence	Sequence Map	Modifications	MH+	MH+	MH+
				Intensity	Sites			Map	Matched	Mass Shift	Error
									(Da)	(Da)	(ppm)
1	CSAKAZAKII48HA.3424.3435.2	2	7.52	16500		(-)MGGIDDGPWSK(R)	(-)M G G I D D\G P/W|S|K(R)		1162.52	0.008	6.9
Group	Subgroup	Spectra	Distinct	Distinct	% AA	Total	Protein MW	Protein	Species	Database	Protein Name
(#)	(#)	(#)	Peptides	Summed	Coverage	Protein	(Da)	pI		Accession #
			(#)	MS/MS Search		Spectral
				Score		Intensity
57	57.1	1	1	7.52	3.8	16100	39284.3	8.41	CAEEL	O44517
#	Filename	z	Score	Spectrum	Variable	Sequence	Sequence Map	Modifications	MH+	MH+	MH+
				Intensity	Sites			Map	Matched	Mass Shift	Error
									(Da)	(Da)	(ppm)
1	CSAKAZAKII48HA.3923.3942.3	3	7.52	16100		(R)CILTTVNPETGTK(D)	(R)C I|L T T V N/P E T G\T K(D)	C:Carbamidomethylation	1433.73	-0.01	-7
Group	Subgroup	Spectra	Distinct	Distinct	% AA	Total	Protein MW	Protein	Species	Database	Protein Name
(#)	(#)	(#)	Peptides	Summed	Coverage	Protein	(Da)	pI		Accession #
			(#)	MS/MS Search		Spectral
				Score		Intensity
58	58.1	1	1	7.42	3.9	233000	32727.4	9.31	CAEEL	G5ECX9
#	Filename	z	Score	Spectrum	Variable	Sequence	Sequence Map	Modifications	MH+	MH+	MH+
				Intensity	Sites			Map	Matched	Mass Shift	Error
									(Da)	(Da)	(ppm)
1	CSAKAZAKII48HA.3378.3433.2	2	7.42	233000		(R)STGSIGDFELK(E)	(R)S T G S|I G D F E/L/K(E)		1153.57	-0.0008	-0.7
Group	Subgroup	Spectra	Distinct	Distinct	% AA	Total	Protein MW	Protein	Species	Database	Protein Name
(#)	(#)	(#)	Peptides	Summed	Coverage	Protein	(Da)	pI		Accession #
			(#)	MS/MS Search		Spectral
				Score		Intensity
59	59.1	1	1	7.4	3	3640	24665	6.33	CAEEL	Q19660
#	Filename	z	Score	Spectrum	Variable	Sequence	Sequence Map	Modifications	MH+	MH+	MH+
				Intensity	Sites			Map	Matched	Mass Shift	Error
									(Da)	(Da)	(ppm)
1	CSAKAZAKII48HA.3838.3838.2	2	7.4	3640		(K)FDSSVIK(A)	(K)F D|S/S V/I/K(A)		795.425	0.0092	11.6
Group	Subgroup	Spectra	Distinct	Distinct	% AA	Total	Protein MW	Protein	Species	Database	Protein Name
(#)	(#)	(#)	Peptides	Summed	Coverage	Protein	(Da)	pI		Accession #
			(#)	MS/MS Search		Spectral
				Score		Intensity
60	60.1	1	1	7.35	3.9	7740	31397.2	9.25	CAEEL	E3CTH5
#	Filename	z	Score	Spectrum	Variable	Sequence	Sequence Map	Modifications	MH+	MH+	MH+
				Intensity	Sites			Map	Matched	Mass Shift	Error
									(Da)	(Da)	(ppm)
1	CSAKAZAKII48HC.3994.3994.2	2	7.35	7740		(R)MFVWTYPDDIK(Q)	(R)M F|V/W T Y P D D I K(Q)		1414.67	-0.0115	-8.1
Group	Subgroup	Spectra	Distinct	Distinct	% AA	Total	Protein MW	Protein	Species	Database	Protein Name
(#)	(#)	(#)	Peptides	Summed	Coverage	Protein	(Da)	pI		Accession #
			(#)	MS/MS Search		Spectral
				Score		Intensity
61	61.1	1	1	7.31	2.6	22400	54636.5	5.1	CAEEL	O18195
#	Filename	z	Score	Spectrum	Variable	Sequence	Sequence Map	Modifications	MH+	MH+	MH+
				Intensity	Sites			Map	Matched	Mass Shift	Error
									(Da)	(Da)	(ppm)
1	CSAKAZAKII48HB.4327.4327.2	2	7.31	22400		(K)KALDADDDGGTSR(S)	(K)K A L D/A/D D/D G/G T S R(S)		1320.6	-0.0264	-20
Group	Subgroup	Spectra	Distinct	Distinct	% AA	Total	Protein MW	Protein	Species	Database	Protein Name
(#)	(#)	(#)	Peptides	Summed	Coverage	Protein	(Da)	pI		Accession #
			(#)	MS/MS Search		Spectral
				Score		Intensity
62	62.1	2	1	7.26	1.6	186000	55502.8	6.31	CAEEL	Q09989
#	Filename	z	Score	Spectrum	Variable	Sequence	Sequence Map	Modifications	MH+	MH+	MH+
				Intensity	Sites			Map	Matched	Mass Shift	Error
									(Da)	(Da)	(ppm)
1	CSAKAZAKII48HA.2144.2280.2	2	7.26	93900		(R)SADSEAVK(R)	(R)S/A|D S E|A V K(R)		806.389	0.0109	13.5
2	CSAKAZAKII48HB.2137.2137.2	2	6.4	92300		(R)SADSEAVK(R)	(R)S A|D S E|A V K(R)		806.389	0.0103	12.8
Group	Subgroup	Spectra	Distinct	Distinct	% AA	Total	Protein MW	Protein	Species	Database	Protein Name
(#)	(#)	(#)	Peptides	Summed	Coverage	Protein	(Da)	pI		Accession #
			(#)	MS/MS Search		Spectral
				Score		Intensity
63	63.1	1	1	7.13	1.8	15100	72371.7	6.36	CAEEL	Q9Y1J3
#	Filename	z	Score	Spectrum	Variable	Sequence	Sequence Map	Modifications	MH+	MH+	MH+
				Intensity	Sites			Map	Matched	Mass Shift	Error
									(Da)	(Da)	(ppm)
1	CSAKAZAKII48HB.3880.3880.3	3	7.13	15100		(K)NSGTFFIHTPNR(V)	(K)N S G/T F/F/I/H T/P N\R(V)		1390.69	0.0186	13.4
Group	Subgroup	Spectra	Distinct	Distinct	% AA	Total	Protein MW	Protein	Species	Database	Protein Name
(#)	(#)	(#)	Peptides	Summed	Coverage	Protein	(Da)	pI		Accession #
			(#)	MS/MS Search		Spectral
				Score		Intensity
64	64.1	1	1	7	0.3	4560	388048	5.04	CAEEL	A0A1N7SYN2
#	Filename	z	Score	Spectrum	Variable	Sequence	Sequence Map	Modifications	MH+	MH+	MH+
				Intensity	Sites			Map	Matched	Mass Shift	Error
									(Da)	(Da)	(ppm)
1	CSAKAZAKII48HB.5370.5370.3	3	7	4560	M95m	(R)RVEDDYmQLLR(Q)	(R)R V/E D/D Y m/Q L L/R(Q)	m:Oxidized methionine	1437.72	16.0094	10
Group	Subgroup	Spectra	Distinct	Distinct	% AA	Total	Protein MW	Protein	Species	Database	Protein Name
(#)	(#)	(#)	Peptides	Summed	Coverage	Protein	(Da)	pI		Accession #
			(#)	MS/MS Search		Spectral
				Score		Intensity
65	65.1	1	1	6.97	3	15100	46416	6.43	CAEEL	Q09270
#	Filename	z	Score	Spectrum	Variable	Sequence	Sequence Map	Modifications	MH+	MH+	MH+
				Intensity	Sites			Map	Matched	Mass Shift	Error
									(Da)	(Da)	(ppm)
1	CSAKAZAKII48HB.3903.3903.3	3	6.97	15100		(K)EHGIDRPKSSHK(D)	(K)E H G I/D/R P K|S/S H K(D)		1390.72	-0.0138	-9.9
Group	Subgroup	Spectra	Distinct	Distinct	% AA	Total	Protein MW	Protein	Species	Database	Protein Name
(#)	(#)	(#)	Peptides	Summed	Coverage	Protein	(Da)	pI		Accession #
			(#)	MS/MS Search		Spectral
				Score		Intensity
66	66.1	1	1	6.91	4.8	2030	44974.1	9.23	CAEEL	Q9GZG1
#	Filename	z	Score	Spectrum	Variable	Sequence	Sequence Map	Modifications	MH+	MH+	MH+
				Intensity	Sites			Map	Matched	Mass Shift	Error
									(Da)	(Da)	(ppm)
1	CSAKAZAKII48HC.4191.4191.2	2	6.91	2030		(K)LEDLNQKYEAGEPSLLQGC(-)	(K)L E D/L N Q/K Y E A G/E/P S L L/Q/G C(-)	C:Carbamidomethylation	2164.02	0.0216	10
Group	Subgroup	Spectra	Distinct	Distinct	% AA	Total	Protein MW	Protein	Species	Database	Protein Name
(#)	(#)	(#)	Peptides	Summed	Coverage	Protein	(Da)	pI		Accession #
			(#)	MS/MS Search		Spectral
				Score		Intensity
67	67.1	2	1	6.79	2.2	293000	71262.5	9.73	CAEEL	Q9TYX6
#	Filename	z	Score	Spectrum	Variable	Sequence	Sequence Map	Modifications	MH+	MH+	MH+
				Intensity	Sites			Map	Matched	Mass Shift	Error
									(Da)	(Da)	(ppm)
1	CSAKAZAKII48HB.5409.5409.3	3	6.79	131000		(R)SNSSQAAGGRSFRK(R)	(R)S N/S S/Q A A G G\R S F/R/K(R)		1452.73	-0.0117	-8
2	CSAKAZAKII48HC.5412.5412.3	3	2.13	162000		(R)SNSSQAAGGRSFRK(R)	(R)S N/S S Q\A A G G\R S F R K(R)		1452.73	-0.0115	-7.9
Group	Subgroup	Spectra	Distinct	Distinct	% AA	Total	Protein MW	Protein	Species	Database	Protein Name
(#)	(#)	(#)	Peptides	Summed	Coverage	Protein	(Da)	pI		Accession #
			(#)	MS/MS Search		Spectral
				Score		Intensity
68	68.1	1	1	6.79	3.4	14800	43595.5	9.14	CAEEL	Q9U366
#	Filename	z	Score	Spectrum	Variable	Sequence	Sequence Map	Modifications	MH+	MH+	MH+
				Intensity	Sites			Map	Matched	Mass Shift	Error
									(Da)	(Da)	(ppm)
1	CSAKAZAKII48HC.3933.3933.3	3	6.79	14800		(K)KDAPVEMNAFNVV(-)	(K)K D A P|V\E M N A F N V/V(-)		1433.71	0.0072	5
Group	Subgroup	Spectra	Distinct	Distinct	% AA	Total	Protein MW	Protein	Species	Database	Protein Name
(#)	(#)	(#)	Peptides	Summed	Coverage	Protein	(Da)	pI		Accession #
			(#)	MS/MS Search		Spectral
				Score		Intensity
69	69.1	1	1	6.78	1.6	9410	74089.8	8.98	CAEEL	Q21157
#	Filename	z	Score	Spectrum	Variable	Sequence	Sequence Map	Modifications	MH+	MH+	MH+
				Intensity	Sites			Map	Matched	Mass Shift	Error
									(Da)	(Da)	(ppm)
1	CSAKAZAKII48HB.3383.3383.2	2	6.78	9410		(K)KDVCVTGGPDK(V)	(K)K\D\V C V T G\G|P D|K(V)	C:Carbamidomethylation	1175.57	-0.0213	-18.2
Group	Subgroup	Spectra	Distinct	Distinct	% AA	Total	Protein MW	Protein	Species	Database	Protein Name
(#)	(#)	(#)	Peptides	Summed	Coverage	Protein	(Da)	pI		Accession #
			(#)	MS/MS Search		Spectral
				Score		Intensity
70	70.1	1	1	6.71	3.3	1230	22901.2	6.25	CAEEL	Q9NA97
#	Filename	z	Score	Spectrum	Variable	Sequence	Sequence Map	Modifications	MH+	MH+	MH+
				Intensity	Sites			Map	Matched	Mass Shift	Error
									(Da)	(Da)	(ppm)
1	CSAKAZAKII48HC.3729.3729.2	2	6.71	1230		(K)TQLEDIK(N)	(K)T|Q|L/E D/I|K(N)		846.457	0.0167	19.7
Group	Subgroup	Spectra	Distinct	Distinct	% AA	Total	Protein MW	Protein	Species	Database	Protein Name
(#)	(#)	(#)	Peptides	Summed	Coverage	Protein	(Da)	pI		Accession #
			(#)	MS/MS Search		Spectral
				Score		Intensity
71	71.1	1	1	6.67	0.6	3550	206684	6.59	CAEEL	B6VQ59
#	Filename	z	Score	Spectrum	Variable	Sequence	Sequence Map	Modifications	MH+	MH+	MH+
				Intensity	Sites			Map	Matched	Mass Shift	Error
									(Da)	(Da)	(ppm)
1	CSAKAZAKII48HB.9384.9384.3	3	6.67	3550		(R)IPLGEMKTIGK(W)	(R)I P L\G/E/M K T/I G K(W)		1186.69	0.0042	3.5
Group	Subgroup	Spectra	Distinct	Distinct	% AA	Total	Protein MW	Protein	Species	Database	Protein Name
(#)	(#)	(#)	Peptides	Summed	Coverage	Protein	(Da)	pI		Accession #
			(#)	MS/MS Search		Spectral
				Score		Intensity
72	72.1	1	1	6.56	9.5	3410	23470.7	10.24	CAEEL	P49391
#	Filename	z	Score	Spectrum	Variable	Sequence	Sequence Map	Modifications	MH+	MH+	MH+
				Intensity	Sites			Map	Matched	Mass Shift	Error
									(Da)	(Da)	(ppm)
1	CSAKAZAKII48HA.5178.5178.2	2	6.56	3410	M21m M22m M23m	(R)GAADLLSTALYKNEmmmSR(R)	(R)G A A/D L L S T A L Y K/N E m m/m\S R(R)	m:Oxidized methionine	2102.01	48.0097	11.6
Group	Subgroup	Spectra	Distinct	Distinct	% AA	Total	Protein MW	Protein	Species	Database	Protein Name
(#)	(#)	(#)	Peptides	Summed	Coverage	Protein	(Da)	pI		Accession #
			(#)	MS/MS Search		Spectral
				Score		Intensity
73	73.1	1	1	6.53	0.2	16900	545358	4.92	CAEEL	Q04833
#	Filename	z	Score	Spectrum	Variable	Sequence	Sequence Map	Modifications	MH+	MH+	MH+
				Intensity	Sites			Map	Matched	Mass Shift	Error
									(Da)	(Da)	(ppm)
1	CSAKAZAKII48HB.3911.3911.3	3	6.53	16900		(R)ASMDGTDRQIIVK(T)	(R)A S\M D G T D R Q\I I V/K(T)		1433.74	-0.0261	-18.2
Group	Subgroup	Spectra	Distinct	Distinct	% AA	Total	Protein MW	Protein	Species	Database	Protein Name
(#)	(#)	(#)	Peptides	Summed	Coverage	Protein	(Da)	pI		Accession #
			(#)	MS/MS Search		Spectral
				Score		Intensity
74	74.1	1	1	6.53	4.2	8000	45367.3	8.38	CAEEL	Q22401
#	Filename	z	Score	Spectrum	Variable	Sequence	Sequence Map	Modifications	MH+	MH+	MH+
				Intensity	Sites			Map	Matched	Mass Shift	Error
									(Da)	(Da)	(ppm)
1	CSAKAZAKII48HC.4485.4485.2	2	6.53	8000	M82m	(R)AmEKISNHTCIKFSPK(D)	(R)A m|E K I S/N H T/C I K/F S P K(D)	C:Carbamidomethylation	1890.96	15.9618	-17.4
								m:Oxidized methionine
Group	Subgroup	Spectra	Distinct	Distinct	% AA	Total	Protein MW	Protein	Species	Database	Protein Name
(#)	(#)	(#)	Peptides	Summed	Coverage	Protein	(Da)	pI		Accession #
			(#)	MS/MS Search		Spectral
				Score		Intensity
75	75.1	2	1	6.53	1.9	21200	72014.6	5	CAEEL	Q9XU06
#	Filename	z	Score	Spectrum	Variable	Sequence	Sequence Map	Modifications	MH+	MH+	MH+
				Intensity	Sites			Map	Matched	Mass Shift	Error
									(Da)	(Da)	(ppm)
1	CSAKAZAKII48HC.5021.5021.2	2	6.53	19200		(K)TKDTIVPVAACK(V)	(K)T\K D\T/I\V P V A A C/K(V)	C:Carbamidomethylation	1302.71	0.0004	0.3
2	CSAKAZAKII48HB.5029.5029.2	2	5.41	2060		(K)TKDTIVPVAACK(V)	(K)T\K D\T|I V P V/A A C/K(V)	C:Carbamidomethylation	1302.71	0.0023	1.8
Group	Subgroup	Spectra	Distinct	Distinct	% AA	Total	Protein MW	Protein	Species	Database	Protein Name
(#)	(#)	(#)	Peptides	Summed	Coverage	Protein	(Da)	pI		Accession #
			(#)	MS/MS Search		Spectral
				Score		Intensity
76	76.1	1	1	6.48	1.7	26200	51746.1	6.51	CAEEL	Q9TZE1
#	Filename	z	Score	Spectrum	Variable	Sequence	Sequence Map	Modifications	MH+	MH+	MH+
				Intensity	Sites			Map	Matched	Mass Shift	Error
									(Da)	(Da)	(ppm)
1	CSAKAZAKII48HB.2276.2276.2	2	6.48	26200		(R)IREGKSGK(K)	(R)I/R/E\G/K\S G K(K)		874.51	-0.0137	-15.7
Group	Subgroup	Spectra	Distinct	Distinct	% AA	Total	Protein MW	Protein	Species	Database	Protein Name
(#)	(#)	(#)	Peptides	Summed	Coverage	Protein	(Da)	pI		Accession #
			(#)	MS/MS Search		Spectral
				Score		Intensity
77	77.1	2	1	6.47	1.3	324000	98412.1	6.58	CAEEL	P34537
#	Filename	z	Score	Spectrum	Variable	Sequence	Sequence Map	Modifications	MH+	MH+	MH+
				Intensity	Sites			Map	Matched	Mass Shift	Error
									(Da)	(Da)	(ppm)
1	CSAKAZAKII48HC.5335.5335.3	3	6.47	162000	M252m	(K)HmRLANKFEYK(L)	(K)H m R\L\A|N|K F E Y K(L)	m:Oxidized methionine	1436.75	15.972	-15.8
2	CSAKAZAKII48HC.5368.5368.3	3	2.91	162000	M252m	(K)HmRLANKFEYK(L)	(K)H m R L A N|K F E Y K(L)	m:Oxidized methionine	1436.75	15.972	-15.8
Group	Subgroup	Spectra	Distinct	Distinct	% AA	Total	Protein MW	Protein	Species	Database	Protein Name
(#)	(#)	(#)	Peptides	Summed	Coverage	Protein	(Da)	pI		Accession #
			(#)	MS/MS Search		Spectral
				Score		Intensity
78	78.1	1	1	6.43	3.3	1010	27025.1	9.81	CAEEL	G3MU69
#	Filename	z	Score	Spectrum	Variable	Sequence	Sequence Map	Modifications	MH+	MH+	MH+
				Intensity	Sites			Map	Matched	Mass Shift	Error
									(Da)	(Da)	(ppm)
1	CSAKAZAKII48HC.3300.3300.2	2	6.43	1010		(R)GNLANVIR(Y)	(R)G N|L/A/N/V/I R(Y)		856.5	-0.0032	-3.7
Group	Subgroup	Spectra	Distinct	Distinct	% AA	Total	Protein MW	Protein	Species	Database	Protein Name
(#)	(#)	(#)	Peptides	Summed	Coverage	Protein	(Da)	pI		Accession #
			(#)	MS/MS Search		Spectral
				Score		Intensity
79	79.1	1	1	6.43	9.3	1600	14115.2	7.93	CAEEL	Q21568
#	Filename	z	Score	Spectrum	Variable	Sequence	Sequence Map	Modifications	MH+	MH+	MH+
				Intensity	Sites			Map	Matched	Mass Shift	Error
									(Da)	(Da)	(ppm)
1	CSAKAZAKII48HA.3369.3369.3	3	6.43	1600		(K)LMDLVQQAMNYK(Q)	(K)L M D/L V Q/Q|A M N Y/K(Q)		1453.72	-0.021	-14.5
Group	Subgroup	Spectra	Distinct	Distinct	% AA	Total	Protein MW	Protein	Species	Database	Protein Name
(#)	(#)	(#)	Peptides	Summed	Coverage	Protein	(Da)	pI		Accession #
			(#)	MS/MS Search		Spectral
				Score		Intensity
80	80.1	1	1	6.42	1.5	53600	84923.3	9.37	CAEEL	Q21376
#	Filename	z	Score	Spectrum	Variable	Sequence	Sequence Map	Modifications	MH+	MH+	MH+
				Intensity	Sites			Map	Matched	Mass Shift	Error
									(Da)	(Da)	(ppm)
1	CSAKAZAKII48HB.4642.4642.2	2	6.42	53600		(K)KKPQNGSLKPK(D)	(K)K K P\Q N G S/L/K/P K(D)		1224.74	0.0059	4.8
Group	Subgroup	Spectra	Distinct	Distinct	% AA	Total	Protein MW	Protein	Species	Database	Protein Name
(#)	(#)	(#)	Peptides	Summed	Coverage	Protein	(Da)	pI		Accession #
			(#)	MS/MS Search		Spectral
				Score		Intensity
81	81.1	1	1	6.41	2.1	4550	70837.2	5.42	CAEEL	O45246
#	Filename	z	Score	Spectrum	Variable	Sequence	Sequence Map	Modifications	MH+	MH+	MH+
				Intensity	Sites			Map	Matched	Mass Shift	Error
									(Da)	(Da)	(ppm)
1	CSAKAZAKII48HB.4734.4734.3	3	6.41	4550		(K)GRIDEVVLVGGSTR(I)	(K)G/R I D\E/V V/L V\G G S T R(I)		1457.81	0.0002	0.1
Group	Subgroup	Spectra	Distinct	Distinct	% AA	Total	Protein MW	Protein	Species	Database	Protein Name
(#)	(#)	(#)	Peptides	Summed	Coverage	Protein	(Da)	pI		Accession #
			(#)	MS/MS Search		Spectral
				Score		Intensity
82	82.1	1	1	6.4	3.6	1530	21443.3	9.42	CAEEL	G5EG43
#	Filename	z	Score	Spectrum	Variable	Sequence	Sequence Map	Modifications	MH+	MH+	MH+
				Intensity	Sites			Map	Matched	Mass Shift	Error
									(Da)	(Da)	(ppm)
1	CSAKAZAKII48HA.2660.2660.2	2	6.4	1530		(K)QKSCCIQ(-)	(K)Q K S C/C/I/Q(-)	C:Carbamidomethylation	923.407	-0.0113	-12.2
Group	Subgroup	Spectra	Distinct	Distinct	% AA	Total	Protein MW	Protein	Species	Database	Protein Name
(#)	(#)	(#)	Peptides	Summed	Coverage	Protein	(Da)	pI		Accession #
			(#)	MS/MS Search		Spectral
				Score		Intensity
83	83.1	1	1	6.4	1.7	2840	129264	6.74	CAEEL	Q09564
#	Filename	z	Score	Spectrum	Variable	Sequence	Sequence Map	Modifications	MH+	MH+	MH+
				Intensity	Sites			Map	Matched	Mass Shift	Error
									(Da)	(Da)	(ppm)
1	CSAKAZAKII48HB.4023.4023.3	3	6.4	2840		(R)EAHGFVDEENRINGVIGSSR(Q)	(R)E A H G/F V D E E/N R\I N\G/V I G S S R(Q)		2186.06	-0.0297	-13.6
Group	Subgroup	Spectra	Distinct	Distinct	% AA	Total	Protein MW	Protein	Species	Database	Protein Name
(#)	(#)	(#)	Peptides	Summed	Coverage	Protein	(Da)	pI		Accession #
			(#)	MS/MS Search		Spectral
				Score		Intensity
84	84.1	1	1	6.36	3.3	16000	34255.3	9.85	CAEEL	E1B6T1
#	Filename	z	Score	Spectrum	Variable	Sequence	Sequence Map	Modifications	MH+	MH+	MH+
				Intensity	Sites			Map	Matched	Mass Shift	Error
									(Da)	(Da)	(ppm)
1	CSAKAZAKII48HB.3434.3434.3	3	6.36	16000		(R)TECPEAESLR(L)	(R)T E C/P E A E S L R(L)	C:Carbamidomethylation	1191.53	-0.0141	-11.9
Group	Subgroup	Spectra	Distinct	Distinct	% AA	Total	Protein MW	Protein	Species	Database	Protein Name
(#)	(#)	(#)	Peptides	Summed	Coverage	Protein	(Da)	pI		Accession #
			(#)	MS/MS Search		Spectral
				Score		Intensity
85	85.1	1	1	6.33	2.6	52800	45159.7	8.74	CAEEL	Q22347
#	Filename	z	Score	Spectrum	Variable	Sequence	Sequence Map	Modifications	MH+	MH+	MH+
				Intensity	Sites			Map	Matched	Mass Shift	Error
									(Da)	(Da)	(ppm)
1	CSAKAZAKII48HB.4351.4362.2	2	6.33	52800		(R)SDPNPKTPAGK(A)	(R)S D|P N P K T P A/G/K(A)		1111.57	-0.0163	-14.6
Group	Subgroup	Spectra	Distinct	Distinct	% AA	Total	Protein MW	Protein	Species	Database	Protein Name
(#)	(#)	(#)	Peptides	Summed	Coverage	Protein	(Da)	pI		Accession #
			(#)	MS/MS Search		Spectral
				Score		Intensity
86	86.1	1	1	6.27	2.2	149000	61407.8	9.55	CAEEL	H2KYE7
#	Filename	z	Score	Spectrum	Variable	Sequence	Sequence Map	Modifications	MH+	MH+	MH+
				Intensity	Sites			Map	Matched	Mass Shift	Error
									(Da)	(Da)	(ppm)
1	CSAKAZAKII48HA.5399.5399.3	3	6.27	149000		(K)HGNVWEQRAAER(A)	(K)H G N V W/E/Q/R\A\A\E R(A)		1452.71	0.0117	8.1
Group	Subgroup	Spectra	Distinct	Distinct	% AA	Total	Protein MW	Protein	Species	Database	Protein Name
(#)	(#)	(#)	Peptides	Summed	Coverage	Protein	(Da)	pI		Accession #
			(#)	MS/MS Search		Spectral
				Score		Intensity
87	87.1	1	1	6.24	2.4	1550	95296	7.72	CAEEL	H2L060
#	Filename	z	Score	Spectrum	Variable	Sequence	Sequence Map	Modifications	MH+	MH+	MH+
				Intensity	Sites			Map	Matched	Mass Shift	Error
									(Da)	(Da)	(ppm)
1	CSAKAZAKII48HA.4851.4851.3	3	6.24	1550	M323m	(K)GGLWGmDFYDMVPMRFLIFNK(K)	(K)G G L/W G m D F\Y D/M/V P/M R F L I F N/K(K)	m:Oxidized methionine	2537.22	16.0297	13.6
Group	Subgroup	Spectra	Distinct	Distinct	% AA	Total	Protein MW	Protein	Species	Database	Protein Name
(#)	(#)	(#)	Peptides	Summed	Coverage	Protein	(Da)	pI		Accession #
			(#)	MS/MS Search		Spectral
				Score		Intensity
88	88.1	1	1	6.23	13.6	31900	10841	6.05	CAEEL	Q23428
#	Filename	z	Score	Spectrum	Variable	Sequence	Sequence Map	Modifications	MH+	MH+	MH+
				Intensity	Sites			Map	Matched	Mass Shift	Error
									(Da)	(Da)	(ppm)
1	CSAKAZAKII48HA.3386.3386.3	3	6.23	31900		(R)LGVDPPCGVPEPK(E)	(R)L/G V D P P C|G V P E P K(E)	C:Carbamidomethylation	1364.69	0.0031	2.3
Group	Subgroup	Spectra	Distinct	Distinct	% AA	Total	Protein MW	Protein	Species	Database	Protein Name
(#)	(#)	(#)	Peptides	Summed	Coverage	Protein	(Da)	pI		Accession #
			(#)	MS/MS Search		Spectral
				Score		Intensity
89	89.1	1	1	6.22	3.5	14000	38678	8.61	CAEEL	O76719
#	Filename	z	Score	Spectrum	Variable	Sequence	Sequence Map	Modifications	MH+	MH+	MH+
				Intensity	Sites			Map	Matched	Mass Shift	Error
									(Da)	(Da)	(ppm)
1	CSAKAZAKII48HC.3641.3641.3	3	6.22	14000		(K)IGKPTGGQVTIK(L)	(K)I/G|K\P T G G Q V/T I K(L)		1198.71	-0.0196	-16.3
Group	Subgroup	Spectra	Distinct	Distinct	% AA	Total	Protein MW	Protein	Species	Database	Protein Name
(#)	(#)	(#)	Peptides	Summed	Coverage	Protein	(Da)	pI		Accession #
			(#)	MS/MS Search		Spectral
				Score		Intensity
90	90.1	1	1	6.16	2.6	2060	47818.8	5.1	CAEEL	G5EDL7
#	Filename	z	Score	Spectrum	Variable	Sequence	Sequence Map	Modifications	MH+	MH+	MH+
				Intensity	Sites			Map	Matched	Mass Shift	Error
									(Da)	(Da)	(ppm)
1	CSAKAZAKII48HB.5031.5031.2	2	6.16	2060		(R)EADLKMLLELK(E)	(R)E A|D/L/K M L L E L/K(E)		1302.73	-0.0228	-17.5
Group	Subgroup	Spectra	Distinct	Distinct	% AA	Total	Protein MW	Protein	Species	Database	Protein Name
(#)	(#)	(#)	Peptides	Summed	Coverage	Protein	(Da)	pI		Accession #
			(#)	MS/MS Search		Spectral
				Score		Intensity
91	91.1	3	1	6.16	2.4	171000	94171.3	6.19	CAEEL	O17744
#	Filename	z	Score	Spectrum	Variable	Sequence	Sequence Map	Modifications	MH+	MH+	MH+
				Intensity	Sites			Map	Matched	Mass Shift	Error
									(Da)	(Da)	(ppm)
1	CSAKAZAKII48HA.4036.4036.2	2	6.16	57800		(K)YAYNNITDGAEAVLLSTYGK(S)	(K)Y A\Y N N I\T D G A E A\V L L S/T Y G/K(S)		2163.06	-0.0067	-3.1
2	CSAKAZAKII48HC.3990.4033.2	2	4.99	59200		(K)YAYNNITDGAEAVLLSTYGK(S)	(K)Y A\Y N\N\I\T D G A E A\V L L S/T Y G K(S)		2163.06	-0.0123	-5.7
3	CSAKAZAKII48HB.3999.4031.2	2	3.66	53600		(K)YAYNNITDGAEAVLLSTYGK(S)	(K)Y A Y N\N I\T D G A E A\V L L S/T Y G/K(S)		2163.06	-0.0109	-5.1
Group	Subgroup	Spectra	Distinct	Distinct	% AA	Total	Protein MW	Protein	Species	Database	Protein Name
(#)	(#)	(#)	Peptides	Summed	Coverage	Protein	(Da)	pI		Accession #
			(#)	MS/MS Search		Spectral
				Score		Intensity
92	92.1	1	1	6.04	0.4	22700	231090	9.01	CAEEL	O16237
#	Filename	z	Score	Spectrum	Variable	Sequence	Sequence Map	Modifications	MH+	MH+	MH+
				Intensity	Sites			Map	Matched	Mass Shift	Error
									(Da)	(Da)	(ppm)
1	CSAKAZAKII48HC.2340.2340.3	3	6.04	22700		(K)SSLPAASCGK(R)	(K)S/S/L P A A S C G K(R)	C:Carbamidomethylation	977.472	0.0128	13.1
Group	Subgroup	Spectra	Distinct	Distinct	% AA	Total	Protein MW	Protein	Species	Database	Protein Name
(#)	(#)	(#)	Peptides	Summed	Coverage	Protein	(Da)	pI		Accession #
			(#)	MS/MS Search		Spectral
				Score		Intensity
93	93.1	5	1	5.98	1.1	116000	136062	9.56	CAEEL	Q23260
#	Filename	z	Score	Spectrum	Variable	Sequence	Sequence Map	Modifications	MH+	MH+	MH+
				Intensity	Sites			Map	Matched	Mass Shift	Error
									(Da)	(Da)	(ppm)
1	CSAKAZAKII48HA.3365.3365.3	3	5.98	19200		(R)SHPSVSTRDSSEER(K)	(R)S H P/S V/S T R/D S S E E R(K)		1573.72	-0.0104	-6.6
2	CSAKAZAKII48HB.3352.3352.3	3	5.95	25800		(R)SHPSVSTRDSSEER(K)	(R)S H P|S V S T R/D S S E E R(K)		1573.72	-0.0129	-8.2
3	CSAKAZAKII48HA.3380.3380.3	3	5.9	19200		(R)SHPSVSTRDSSEER(K)	(R)S H P/S V/S T R|D S S E E R(K)		1573.72	-0.0104	-6.6
4	CSAKAZAKII48HB.3358.3358.3	3	5.75	25800		(R)SHPSVSTRDSSEER(K)	(R)S H P/S\V S T R/D S S/E E R(K)		1573.72	-0.0129	-8.2
5	CSAKAZAKII48HB.3367.3367.3	3	3.72	25800		(R)SHPSVSTRDSSEER(K)	(R)S H P/S\V S T R/D S\S E E R(K)		1573.72	-0.0129	-8.2
Group	Subgroup	Spectra	Distinct	Distinct	% AA	Total	Protein MW	Protein	Species	Database	Protein Name
(#)	(#)	(#)	Peptides	Summed	Coverage	Protein	(Da)	pI		Accession #
			(#)	MS/MS Search		Spectral
				Score		Intensity
94	94.1	1	1	5.97	0.8	2650	107121	4.89	CAEEL	G5EDT4
#	Filename	z	Score	Spectrum	Variable	Sequence	Sequence Map	Modifications	MH+	MH+	MH+
				Intensity	Sites			Map	Matched	Mass Shift	Error
									(Da)	(Da)	(ppm)
1	CSAKAZAKII48HA.3324.3324.2	2	5.97	2650		(R)AKNELPGK(G)	(R)A/K/N/E|L P\G K(G)		856.489	0.0024	2.9
Group	Subgroup	Spectra	Distinct	Distinct	% AA	Total	Protein MW	Protein	Species	Database	Protein Name
(#)	(#)	(#)	Peptides	Summed	Coverage	Protein	(Da)	pI		Accession #
			(#)	MS/MS Search		Spectral
				Score		Intensity
95	95.1	1	1	5.93	2.6	5500	40152.9	9.67	CAEEL	Q9GRY7
#	Filename	z	Score	Spectrum	Variable	Sequence	Sequence Map	Modifications	MH+	MH+	MH+
				Intensity	Sites			Map	Matched	Mass Shift	Error
									(Da)	(Da)	(ppm)
1	CSAKAZAKII48HB.2361.2361.2	2	5.93	5500	M45m	(K)TPPTmTSVK(W)	(K)T/P|P T m T S V/K(W)	m:Oxidized methionine	961.502	15.9791	-16.2
Group	Subgroup	Spectra	Distinct	Distinct	% AA	Total	Protein MW	Protein	Species	Database	Protein Name
(#)	(#)	(#)	Peptides	Summed	Coverage	Protein	(Da)	pI		Accession #
			(#)	MS/MS Search		Spectral
				Score		Intensity
96	96.1	1	1	5.92	6.2	15100	21366.4	10.89	CAEEL	P10771
#	Filename	z	Score	Spectrum	Variable	Sequence	Sequence Map	Modifications	MH+	MH+	MH+
				Intensity	Sites			Map	Matched	Mass Shift	Error
									(Da)	(Da)	(ppm)
1	CSAKAZAKII48HB.3934.3934.3	3	5.92	15100	M1m	(-)mSDSAVVAAAVEPK(V)	(-)m S D S A/V V A A|A V E\P K(V)	m:Oxidized methionine	1374.69	16.0115	11.9
Group	Subgroup	Spectra	Distinct	Distinct	% AA	Total	Protein MW	Protein	Species	Database	Protein Name
(#)	(#)	(#)	Peptides	Summed	Coverage	Protein	(Da)	pI		Accession #
			(#)	MS/MS Search		Spectral
				Score		Intensity
97	97.1	1	1	5.89	10	162000	13835.1	8.23	CAEEL	Q7YWP1
#	Filename	z	Score	Spectrum	Variable	Sequence	Sequence Map	Modifications	MH+	MH+	MH+
				Intensity	Sites			Map	Matched	Mass Shift	Error
									(Da)	(Da)	(ppm)
1	CSAKAZAKII48HC.5366.5366.3	3	5.89	162000	M1m	(-)mGAGVSGEPVYLTR(S)	(-)m G A G V S/G E P V/Y L T R(S)	m:Oxidized methionine	1436.72	15.9985	2.4
Group	Subgroup	Spectra	Distinct	Distinct	% AA	Total	Protein MW	Protein	Species	Database	Protein Name
(#)	(#)	(#)	Peptides	Summed	Coverage	Protein	(Da)	pI		Accession #
			(#)	MS/MS Search		Spectral
				Score		Intensity
98	98.1	1	1	5.86	3.8	6560	28646.9	9.87	CAEEL	Q22621
#	Filename	z	Score	Spectrum	Variable	Sequence	Sequence Map	Modifications	MH+	MH+	MH+
				Intensity	Sites			Map	Matched	Mass Shift	Error
									(Da)	(Da)	(ppm)
1	CSAKAZAKII48HB.4267.4267.2	2	5.86	6560		(R)QTTPEGNFR(C)	(R)Q T/T P E G/N F/R(C)		1049.5	-0.0036	-3.5
Group	Subgroup	Spectra	Distinct	Distinct	% AA	Total	Protein MW	Protein	Species	Database	Protein Name
(#)	(#)	(#)	Peptides	Summed	Coverage	Protein	(Da)	pI		Accession #
			(#)	MS/MS Search		Spectral
				Score		Intensity
99	99.1	2	1	5.84	15.3	0	13532.4	6.64	CAEEL	Q09506
#	Filename	z	Score	Spectrum	Variable	Sequence	Sequence Map	Modifications	MH+	MH+	MH+
				Intensity	Sites			Map	Matched	Mass Shift	Error
									(Da)	(Da)	(ppm)
1	CSAKAZAKII48HA.4017.4017.2	2	5.84	57800	M93m	(K)ILQVNGADFTmMTHDRAVK(F)	(K)I L Q V|N G\A D F T m M/T H D R A V K(F)	m:Oxidized methionine	2147.07	15.9801	-6.8
Group	Subgroup	Spectra	Distinct	Distinct	% AA	Total	Protein MW	Protein	Species	Database	Protein Name
(#)	(#)	(#)	Peptides	Summed	Coverage	Protein	(Da)	pI		Accession #
			(#)	MS/MS Search		Spectral
				Score		Intensity
100	100.1	1	1	5.82	3	13000	48565.2	10.7	CAEEL	P34488
#	Filename	z	Score	Spectrum	Variable	Sequence	Sequence Map	Modifications	MH+	MH+	MH+
				Intensity	Sites			Map	Matched	Mass Shift	Error
									(Da)	(Da)	(ppm)
1	CSAKAZAKII48HB.3351.3351.2	2	5.82	13000		(R)RTSASSCLVGGNR(A)	(R)R T S|A|S S C L V G/G N R(A)	C:Carbamidomethylation	1364.67	0.0168	12.3
Group	Subgroup	Spectra	Distinct	Distinct	% AA	Total	Protein MW	Protein	Species	Database	Protein Name
(#)	(#)	(#)	Peptides	Summed	Coverage	Protein	(Da)	pI		Accession #
			(#)	MS/MS Search		Spectral
				Score		Intensity
101	101.1	1	1	5.8	0.3	8050	460350	5.95	CAEEL	G5EBH3
#	Filename	z	Score	Spectrum	Variable	Sequence	Sequence Map	Modifications	MH+	MH+	MH+
				Intensity	Sites			Map	Matched	Mass Shift	Error
									(Da)	(Da)	(ppm)
1	CSAKAZAKII48HB.3359.3359.2	2	5.8	8050		(K)KYEVEYCQELGR(R)	(K)K\Y E/V E Y C Q/E|L G R(R)	C:Carbamidomethylation	1573.73	-0.0255	-16.2
Group	Subgroup	Spectra	Distinct	Distinct	% AA	Total	Protein MW	Protein	Species	Database	Protein Name
(#)	(#)	(#)	Peptides	Summed	Coverage	Protein	(Da)	pI		Accession #
			(#)	MS/MS Search		Spectral
				Score		Intensity
102	102.1	1	1	5.79	2.9	18900	40441.2	7.88	CAEEL	Q9XXS2
#	Filename	z	Score	Spectrum	Variable	Sequence	Sequence Map	Modifications	MH+	MH+	MH+
				Intensity	Sites			Map	Matched	Mass Shift	Error
									(Da)	(Da)	(ppm)
1	CSAKAZAKII48HC.8424.8424.2	2	5.79	18900		(K)IITLANQKCK(E)	(K)I I T L/A N/Q K C K(E)	C:Carbamidomethylation	1188.68	-0.0014	-1.2
Group	Subgroup	Spectra	Distinct	Distinct	% AA	Total	Protein MW	Protein	Species	Database	Protein Name
(#)	(#)	(#)	Peptides	Summed	Coverage	Protein	(Da)	pI		Accession #
			(#)	MS/MS Search		Spectral
				Score		Intensity
103	103.1	1	1	5.75	2.8	106000	29126.7	6.24	CAEEL	Q19812
#	Filename	z	Score	Spectrum	Variable	Sequence	Sequence Map	Modifications	MH+	MH+	MH+
				Intensity	Sites			Map	Matched	Mass Shift	Error
									(Da)	(Da)	(ppm)
1	CSAKAZAKII48HA.2038.2038.2	2	5.75	106000		(K)IEKPEYK(K)	(K)I\E|K P E Y/K(K)		906.493	0.0083	9.2
Group	Subgroup	Spectra	Distinct	Distinct	% AA	Total	Protein MW	Protein	Species	Database	Protein Name
(#)	(#)	(#)	Peptides	Summed	Coverage	Protein	(Da)	pI		Accession #
			(#)	MS/MS Search		Spectral
				Score		Intensity
104	104.1	1	1	5.73	0.8	7990	113205	6.2	CAEEL	Q09600
#	Filename	z	Score	Spectrum	Variable	Sequence	Sequence Map	Modifications	MH+	MH+	MH+
				Intensity	Sites			Map	Matched	Mass Shift	Error
									(Da)	(Da)	(ppm)
1	CSAKAZAKII48HC.3728.3728.2	2	5.73	7990		(R)NTIKENNK(A)	(R)N/T/I K|E N/N/K(A)		960.511	0.0074	7.7
Group	Subgroup	Spectra	Distinct	Distinct	% AA	Total	Protein MW	Protein	Species	Database	Protein Name
(#)	(#)	(#)	Peptides	Summed	Coverage	Protein	(Da)	pI		Accession #
			(#)	MS/MS Search		Spectral
				Score		Intensity
105	105.1	1	1	5.73	0.5	16000	123571	4.61	CAEEL	Q9N5V3
#	Filename	z	Score	Spectrum	Variable	Sequence	Sequence Map	Modifications	MH+	MH+	MH+
				Intensity	Sites			Map	Matched	Mass Shift	Error
									(Da)	(Da)	(ppm)
1	CSAKAZAKII48HB.2895.2895.2	2	5.73	16000		(K)IEGPTK(V)	(K)I/E/G/P/T K(V)		644.361	0.0094	14.6
Group	Subgroup	Spectra	Distinct	Distinct	% AA	Total	Protein MW	Protein	Species	Database	Protein Name
(#)	(#)	(#)	Peptides	Summed	Coverage	Protein	(Da)	pI		Accession #
			(#)	MS/MS Search		Spectral
				Score		Intensity
106	106.1	1	1	5.7	8.5	8290	10899.1	6.34	CAEEL	Q9XWC0
#	Filename	z	Score	Spectrum	Variable	Sequence	Sequence Map	Modifications	MH+	MH+	MH+
				Intensity	Sites			Map	Matched	Mass Shift	Error
									(Da)	(Da)	(ppm)
1	CSAKAZAKII48HB.3758.3758.2	2	5.7	8290		(K)SENLEKLK(E)	(K)S E/N\L E/K/L/K(E)		960.536	-0.0192	-20
Group	Subgroup	Spectra	Distinct	Distinct	% AA	Total	Protein MW	Protein	Species	Database	Protein Name
(#)	(#)	(#)	Peptides	Summed	Coverage	Protein	(Da)	pI		Accession #
			(#)	MS/MS Search		Spectral
				Score		Intensity
107	107.1	1	1	5.66	6.6	31900	21386.9	9.95	CAEEL	G4S101
#	Filename	z	Score	Spectrum	Variable	Sequence	Sequence Map	Modifications	MH+	MH+	MH+
				Intensity	Sites			Map	Matched	Mass Shift	Error
									(Da)	(Da)	(ppm)
1	CSAKAZAKII48HA.3416.3416.3	3	5.66	31900		(K)ITLGTDQDPYNK(E)	(K)I/T L/G T D/Q D P Y N K(E)		1364.67	0.021	15.4
Group	Subgroup	Spectra	Distinct	Distinct	% AA	Total	Protein MW	Protein	Species	Database	Protein Name
(#)	(#)	(#)	Peptides	Summed	Coverage	Protein	(Da)	pI		Accession #
			(#)	MS/MS Search		Spectral
				Score		Intensity
108	108.1	1	1	5.65	1.2	14800	139347	6.68	CAEEL	G5EG03
#	Filename	z	Score	Spectrum	Variable	Sequence	Sequence Map	Modifications	MH+	MH+	MH+
				Intensity	Sites			Map	Matched	Mass Shift	Error
									(Da)	(Da)	(ppm)
1	CSAKAZAKII48HC.3912.3912.3	3	5.65	14800		(K)QGECIALVGASGSGK(S)	(K)Q G E C I A L V G/A S G S G K(S)	C:Carbamidomethylation	1433.7	0.0112	7.8
Group	Subgroup	Spectra	Distinct	Distinct	% AA	Total	Protein MW	Protein	Species	Database	Protein Name
(#)	(#)	(#)	Peptides	Summed	Coverage	Protein	(Da)	pI		Accession #
			(#)	MS/MS Search		Spectral
				Score		Intensity
109	109.1	1	1	5.65	1.6	12100	68181.2	9.45	CAEEL	Q17532
#	Filename	z	Score	Spectrum	Variable	Sequence	Sequence Map	Modifications	MH+	MH+	MH+
				Intensity	Sites			Map	Matched	Mass Shift	Error
									(Da)	(Da)	(ppm)
1	CSAKAZAKII48HC.3666.3666.3	3	5.65	12100		(-)MWSRGLPTLCR(T)	(-)M/W\S R G L P T L C R(T)	C:Carbamidomethylation	1376.69	-0.0073	-5.3
Group	Subgroup	Spectra	Distinct	Distinct	% AA	Total	Protein MW	Protein	Species	Database	Protein Name
(#)	(#)	(#)	Peptides	Summed	Coverage	Protein	(Da)	pI		Accession #
			(#)	MS/MS Search		Spectral
				Score		Intensity
110	110.1	1	1	5.63	10.4	25800	14299.6	11.25	CAEEL	G3MU77
#	Filename	z	Score	Spectrum	Variable	Sequence	Sequence Map	Modifications	MH+	MH+	MH+
				Intensity	Sites			Map	Matched	Mass Shift	Error
									(Da)	(Da)	(ppm)
1	CSAKAZAKII48HB.3401.3401.3	3	5.63	25800		(R)NGGGGGHRPYDPSFR(R)	(R)N G G G G G H R P Y D/P/S/F R(R)		1573.73	-0.0183	-11.6
Group	Subgroup	Spectra	Distinct	Distinct	% AA	Total	Protein MW	Protein	Species	Database	Protein Name
(#)	(#)	(#)	Peptides	Summed	Coverage	Protein	(Da)	pI		Accession #
			(#)	MS/MS Search		Spectral
				Score		Intensity
111	111.1	1	1	5.62	12.5	46400	11770.5	6.11	CAEEL	Q8MPX7
#	Filename	z	Score	Spectrum	Variable	Sequence	Sequence Map	Modifications	MH+	MH+	MH+
				Intensity	Sites			Map	Matched	Mass Shift	Error
									(Da)	(Da)	(ppm)
1	CSAKAZAKII48HB.3909.3950.2	2	5.62	46400		(K)ELESGTAPKDVCK(K)	(K)E L\E S G T A P K D V C/K(K)	C:Carbamidomethylation	1433.69	0.0216	15
Group	Subgroup	Spectra	Distinct	Distinct	% AA	Total	Protein MW	Protein	Species	Database	Protein Name
(#)	(#)	(#)	Peptides	Summed	Coverage	Protein	(Da)	pI		Accession #
			(#)	MS/MS Search		Spectral
				Score		Intensity
112	112.1	1	1	5.54	2	42500	77300.5	7.79	CAEEL	Q20059
#	Filename	z	Score	Spectrum	Variable	Sequence	Sequence Map	Modifications	MH+	MH+	MH+
				Intensity	Sites			Map	Matched	Mass Shift	Error
									(Da)	(Da)	(ppm)
1	CSAKAZAKII48HA.4415.4415.2	2	5.54	42500		(-)MSSCVNTSQTGPKKK(I)	(-)M S S C V/N T S Q T/G/P/K K/K(I)	C:Carbamidomethylation	1652.81	0.0164	9.9
Group	Subgroup	Spectra	Distinct	Distinct	% AA	Total	Protein MW	Protein	Species	Database	Protein Name
(#)	(#)	(#)	Peptides	Summed	Coverage	Protein	(Da)	pI		Accession #
			(#)	MS/MS Search		Spectral
				Score		Intensity
113	113.1	1	1	5.5	3.9	11900	38205.5	9.21	CAEEL	O62506
#	Filename	z	Score	Spectrum	Variable	Sequence	Sequence Map	Modifications	MH+	MH+	MH+
				Intensity	Sites			Map	Matched	Mass Shift	Error
									(Da)	(Da)	(ppm)
1	CSAKAZAKII48HC.3353.3353.2	2	5.5	11900		(K)QMGSLSSQSQALK(S)	(K)Q\M G S L S S Q S Q/A L K(S)		1364.68	0.0008	0.6
Group	Subgroup	Spectra	Distinct	Distinct	% AA	Total	Protein MW	Protein	Species	Database	Protein Name
(#)	(#)	(#)	Peptides	Summed	Coverage	Protein	(Da)	pI		Accession #
			(#)	MS/MS Search		Spectral
				Score		Intensity
114	114.1	1	1	5.43	1.1	69700	57885.6	6.45	CAEEL	O62377
#	Filename	z	Score	Spectrum	Variable	Sequence	Sequence Map	Modifications	MH+	MH+	MH+
				Intensity	Sites			Map	Matched	Mass Shift	Error
									(Da)	(Da)	(ppm)
1	CSAKAZAKII48HC.2512.2512.2	2	5.43	69700		(R)NFGFGR(N)	(R)N|F G F G R(N)		697.342	-0.0137	-19.7
Group	Subgroup	Spectra	Distinct	Distinct	% AA	Total	Protein MW	Protein	Species	Database	Protein Name
(#)	(#)	(#)	Peptides	Summed	Coverage	Protein	(Da)	pI		Accession #
			(#)	MS/MS Search		Spectral
				Score		Intensity
115	115.1	1	1	5.38	2.1	6740	77817.4	6	CAEEL	O62446
#	Filename	z	Score	Spectrum	Variable	Sequence	Sequence Map	Modifications	MH+	MH+	MH+
				Intensity	Sites			Map	Matched	Mass Shift	Error
									(Da)	(Da)	(ppm)
1	CSAKAZAKII48HB.3875.3875.3	3	5.38	6740		(K)ILGEDAYPYCSDIK(H)	(K)I/L G/E D A/Y P\Y\C S D I/K(H)	C:Carbamidomethylation	1643.76	-0.0249	-15.2
Group	Subgroup	Spectra	Distinct	Distinct	% AA	Total	Protein MW	Protein	Species	Database	Protein Name
(#)	(#)	(#)	Peptides	Summed	Coverage	Protein	(Da)	pI		Accession #
			(#)	MS/MS Search		Spectral
				Score		Intensity
116	116.1	1	1	5.37	2.7	16900	50358	5.65	CAEEL	G1K0W2
#	Filename	z	Score	Spectrum	Variable	Sequence	Sequence Map	Modifications	MH+	MH+	MH+
				Intensity	Sites			Map	Matched	Mass Shift	Error
									(Da)	(Da)	(ppm)
1	CSAKAZAKII48HB.3929.3929.3	3	5.37	16900	M181m	(R)LmTGDQILEVNGK(D)	(R)L m T G D Q I L\E V/N G K(D)	m:Oxidized methionine	1417.74	15.98	-10.4
Group	Subgroup	Spectra	Distinct	Distinct	% AA	Total	Protein MW	Protein	Species	Database	Protein Name
(#)	(#)	(#)	Peptides	Summed	Coverage	Protein	(Da)	pI		Accession #
			(#)	MS/MS Search		Spectral
				Score		Intensity
117	117.1	1	1	5.36	2.6	2270	57854.7	6.18	CAEEL	Q27471
#	Filename	z	Score	Spectrum	Variable	Sequence	Sequence Map	Modifications	MH+	MH+	MH+
				Intensity	Sites			Map	Matched	Mass Shift	Error
									(Da)	(Da)	(ppm)
1	CSAKAZAKII48HB.7288.7288.3	3	5.36	2270		(K)ILIEAEELIKKLK(T)	(K)I L I E A E/E L\I/K/K/L\K(T)		1539.97	-0.0083	-5.4
Group	Subgroup	Spectra	Distinct	Distinct	% AA	Total	Protein MW	Protein	Species	Database	Protein Name
(#)	(#)	(#)	Peptides	Summed	Coverage	Protein	(Da)	pI		Accession #
			(#)	MS/MS Search		Spectral
				Score		Intensity
118	118.1	1	1	5.33	2.6	46900	64522.3	5.76	CAEEL	G5EGP1
#	Filename	z	Score	Spectrum	Variable	Sequence	Sequence Map	Modifications	MH+	MH+	MH+
				Intensity	Sites			Map	Matched	Mass Shift	Error
									(Da)	(Da)	(ppm)
1	CSAKAZAKII48HC.3893.3956.2	2	5.33	46900		(R)GSPGDQGPVGPPGRR(G)	(R)G S P|G\D/Q G\P V\G P/P G R R(G)		1433.72	-0.0058	-4
Group	Subgroup	Spectra	Distinct	Distinct	% AA	Total	Protein MW	Protein	Species	Database	Protein Name
(#)	(#)	(#)	Peptides	Summed	Coverage	Protein	(Da)	pI		Accession #
			(#)	MS/MS Search		Spectral
				Score		Intensity
119	119.1	3	1	5.31	0.8	78700	126499	6.64	CAEEL	Q22992
#	Filename	z	Score	Spectrum	Variable	Sequence	Sequence Map	Modifications	MH+	MH+	MH+
				Intensity	Sites			Map	Matched	Mass Shift	Error
									(Da)	(Da)	(ppm)
1	CSAKAZAKII48HA.3013.3013.2	2	5.31	24500	M162m	(K)RLmGGGESSK(S)	(K)R L m G/G G E/S S K(S)	m:Oxidized methionine	1021.51	15.9793	-15.1
2	CSAKAZAKII48HB.3050.3050.2	2	4.61	29600	M162m	(K)RLmGGGESSK(S)	(K)R L/m G|G G E/S S K(S)	m:Oxidized methionine	1021.51	15.9783	-16
3	CSAKAZAKII48HA.3051.3051.2	2	4.15	24500	M162m	(K)RLmGGGESSK(S)	(K)R L m/G|G G\E/S S K(S)	m:Oxidized methionine	1021.51	15.9793	-15.1
Group	Subgroup	Spectra	Distinct	Distinct	% AA	Total	Protein MW	Protein	Species	Database	Protein Name
(#)	(#)	(#)	Peptides	Summed	Coverage	Protein	(Da)	pI		Accession #
			(#)	MS/MS Search		Spectral
				Score		Intensity
120	120.1	1	1	5.28	0.6	106000	140707	6.32	CAEEL	G4S4A1
#	Filename	z	Score	Spectrum	Variable	Sequence	Sequence Map	Modifications	MH+	MH+	MH+
				Intensity	Sites			Map	Matched	Mass Shift	Error
									(Da)	(Da)	(ppm)
1	CSAKAZAKII48HB.2957.2984.2	2	5.28	106000		(K)APLLCEYR(R)	(K)A/P\L\L\C E Y R(R)	C:Carbamidomethylation	1021.51	-0.0099	-9.7
Group	Subgroup	Spectra	Distinct	Distinct	% AA	Total	Protein MW	Protein	Species	Database	Protein Name
(#)	(#)	(#)	Peptides	Summed	Coverage	Protein	(Da)	pI		Accession #
			(#)	MS/MS Search		Spectral
				Score		Intensity
121	121.1	1	1	5.26	4.1	149000	35171.3	9.32	CAEEL	O16222
#	Filename	z	Score	Spectrum	Variable	Sequence	Sequence Map	Modifications	MH+	MH+	MH+
				Intensity	Sites			Map	Matched	Mass Shift	Error
									(Da)	(Da)	(ppm)
1	CSAKAZAKII48HA.5316.5316.3	3	5.26	149000		(K)NGRPETEKNHDR(N)	(K)N G R P|E T|E\K/N/H D\R(N)		1452.69	0.027	18.6
Group	Subgroup	Spectra	Distinct	Distinct	% AA	Total	Protein MW	Protein	Species	Database	Protein Name
(#)	(#)	(#)	Peptides	Summed	Coverage	Protein	(Da)	pI		Accession #
			(#)	MS/MS Search		Spectral
				Score		Intensity
122	122.1	1	1	5.22	2.4	149000	55793.7	8.76	CAEEL	O16518
#	Filename	z	Score	Spectrum	Variable	Sequence	Sequence Map	Modifications	MH+	MH+	MH+
				Intensity	Sites			Map	Matched	Mass Shift	Error
									(Da)	(Da)	(ppm)
1	CSAKAZAKII48HA.5431.5431.3	3	5.22	149000		(K)ASKDYARMINQR(H)	(K)A S K D Y/A/R M I N Q R(H)		1452.74	-0.0168	-11.6
Group	Subgroup	Spectra	Distinct	Distinct	% AA	Total	Protein MW	Protein	Species	Database	Protein Name
(#)	(#)	(#)	Peptides	Summed	Coverage	Protein	(Da)	pI		Accession #
			(#)	MS/MS Search		Spectral
				Score		Intensity
123	123.1	1	1	5.2	6.1	690	18561.2	9.56	CAEEL	Q9N4A2
#	Filename	z	Score	Spectrum	Variable	Sequence	Sequence Map	Modifications	MH+	MH+	MH+
				Intensity	Sites			Map	Matched	Mass Shift	Error
									(Da)	(Da)	(ppm)
1	CSAKAZAKII48HA.3561.3561.2	2	5.2	690		(K)AHKSMKLTAK(S)	(K)A H K S|M/K L T A K(S)		1114.64	0.0116	10.4
Group	Subgroup	Spectra	Distinct	Distinct	% AA	Total	Protein MW	Protein	Species	Database	Protein Name
(#)	(#)	(#)	Peptides	Summed	Coverage	Protein	(Da)	pI		Accession #
			(#)	MS/MS Search		Spectral
				Score		Intensity
124	124.1	1	1	5.18	2.4	14500	94846.8	5.9	CAEEL	Q18286
#	Filename	z	Score	Spectrum	Variable	Sequence	Sequence Map	Modifications	MH+	MH+	MH+
				Intensity	Sites			Map	Matched	Mass Shift	Error
									(Da)	(Da)	(ppm)
1	CSAKAZAKII48HA.4399.4399.3	3	5.18	14500		(R)QHLDARFGGSPDVLMMLKMK(K)	(R)Q H L D A R F G G S P D V L/M/M/L K M/K(K)		2274.16	-0.0036	-1.6
Group	Subgroup	Spectra	Distinct	Distinct	% AA	Total	Protein MW	Protein	Species	Database	Protein Name
(#)	(#)	(#)	Peptides	Summed	Coverage	Protein	(Da)	pI		Accession #
			(#)	MS/MS Search		Spectral
				Score		Intensity
125	125.1	1	1	5.15	0.1	262000	790266	5.78	CAEEL	A0A061ACT3
#	Filename	z	Score	Spectrum	Variable	Sequence	Sequence Map	Modifications	MH+	MH+	MH+
				Intensity	Sites			Map	Matched	Mass Shift	Error
									(Da)	(Da)	(ppm)
1	CSAKAZAKII48HA.2215.2215.2	2	5.15	262000		(K)NGTESGIK(T)	(K)N/G/T E S|G I K(T)		805.405	0.01	12.4
Group	Subgroup	Spectra	Distinct	Distinct	% AA	Total	Protein MW	Protein	Species	Database	Protein Name
(#)	(#)	(#)	Peptides	Summed	Coverage	Protein	(Da)	pI		Accession #
			(#)	MS/MS Search		Spectral
				Score		Intensity
126	126.1	1	1	5.14	2.3	7670	35214.6	5.46	CAEEL	Q10905
#	Filename	z	Score	Spectrum	Variable	Sequence	Sequence Map	Modifications	MH+	MH+	MH+
				Intensity	Sites			Map	Matched	Mass Shift	Error
									(Da)	(Da)	(ppm)
1	CSAKAZAKII48HA.3840.3870.2	2	5.14	7670	M198m	(R)MINmGAK(V)	(R)M I N|m G/A K(V)	m:Oxidized methionine	764.379	16.0095	18.7
Group	Subgroup	Spectra	Distinct	Distinct	% AA	Total	Protein MW	Protein	Species	Database	Protein Name
(#)	(#)	(#)	Peptides	Summed	Coverage	Protein	(Da)	pI		Accession #
			(#)	MS/MS Search		Spectral
				Score		Intensity
127	127.1	1	1	5.13	2.7	17500	97202	5.77	CAEEL	Q19070
#	Filename	z	Score	Spectrum	Variable	Sequence	Sequence Map	Modifications	MH+	MH+	MH+
				Intensity	Sites			Map	Matched	Mass Shift	Error
									(Da)	(Da)	(ppm)
1	CSAKAZAKII48HC.4729.4729.3	3	5.13	17500	M275m	(K)IFSQVVGDVDTCLPDVmAELGIR(L)	(K)I F S Q V\V G D V D T C L P D V\m A\E L/G/I R(L)	C:Carbamidomethylation	2534.26	15.9622	-12.8
								m:Oxidized methionine
Group	Subgroup	Spectra	Distinct	Distinct	% AA	Total	Protein MW	Protein	Species	Database	Protein Name
(#)	(#)	(#)	Peptides	Summed	Coverage	Protein	(Da)	pI		Accession #
			(#)	MS/MS Search		Spectral
				Score		Intensity
128	128.1	1	1	5.12	1.3	22000	78073.3	9.8	CAEEL	Q86S68
#	Filename	z	Score	Spectrum	Variable	Sequence	Sequence Map	Modifications	MH+	MH+	MH+
				Intensity	Sites			Map	Matched	Mass Shift	Error
									(Da)	(Da)	(ppm)
1	CSAKAZAKII48HB.2341.2341.2	2	5.12	22000		(K)KIIDESITK(T)	(K)K\I|I\D E/S I T K(T)		1046.61	-0.0176	-16.9
Group	Subgroup	Spectra	Distinct	Distinct	% AA	Total	Protein MW	Protein	Species	Database	Protein Name
(#)	(#)	(#)	Peptides	Summed	Coverage	Protein	(Da)	pI		Accession #
			(#)	MS/MS Search		Spectral
				Score		Intensity
129	129.1	1	1	5.12	3.6	7310	29003.3	9.04	CAEEL	Q9N5U6
#	Filename	z	Score	Spectrum	Variable	Sequence	Sequence Map	Modifications	MH+	MH+	MH+
				Intensity	Sites			Map	Matched	Mass Shift	Error
									(Da)	(Da)	(ppm)
1	CSAKAZAKII48HC.3271.3271.2	2	5.12	7310		(K)ELAAAAAEK(Q)	(K)E L A/A A/A A E K(Q)		873.468	-0.0077	-8.8
Group	Subgroup	Spectra	Distinct	Distinct	% AA	Total	Protein MW	Protein	Species	Database	Protein Name
(#)	(#)	(#)	Peptides	Summed	Coverage	Protein	(Da)	pI		Accession #
			(#)	MS/MS Search		Spectral
				Score		Intensity
130	130.1	1	1	5.08	0.2	9630	413952	5.98	CAEEL	A5Z2S3
#	Filename	z	Score	Spectrum	Variable	Sequence	Sequence Map	Modifications	MH+	MH+	MH+
				Intensity	Sites			Map	Matched	Mass Shift	Error
									(Da)	(Da)	(ppm)
1	CSAKAZAKII48HA.3756.3756.2	2	5.08	9630		(K)ITEGHLYK(S)	(K)I T/E|G/H|L Y/K(S)		960.515	0.0008	0.9
Group	Subgroup	Spectra	Distinct	Distinct	% AA	Total	Protein MW	Protein	Species	Database	Protein Name
(#)	(#)	(#)	Peptides	Summed	Coverage	Protein	(Da)	pI		Accession #
			(#)	MS/MS Search		Spectral
				Score		Intensity
131	131.1	1	1	5.07	10.7	22700	9254.5	6.24	CAEEL	A0A061AD09
#	Filename	z	Score	Spectrum	Variable	Sequence	Sequence Map	Modifications	MH+	MH+	MH+
				Intensity	Sites			Map	Matched	Mass Shift	Error
									(Da)	(Da)	(ppm)
1	CSAKAZAKII48HC.2373.2373.3	3	5.07	22700		(R)FDGALRMPA(-)	(R)F D G/A/L R M P A(-)		977.487	-0.0024	-2.5
Group	Subgroup	Spectra	Distinct	Distinct	% AA	Total	Protein MW	Protein	Species	Database	Protein Name
(#)	(#)	(#)	Peptides	Summed	Coverage	Protein	(Da)	pI		Accession #
			(#)	MS/MS Search		Spectral
				Score		Intensity
132	132.1	1	1	5.06	0.5	4620	129654	6.11	CAEEL	B7CED8
#	Filename	z	Score	Spectrum	Variable	Sequence	Sequence Map	Modifications	MH+	MH+	MH+
				Intensity	Sites			Map	Matched	Mass Shift	Error
									(Da)	(Da)	(ppm)
1	CSAKAZAKII48HA.2237.2237.2	2	5.06	4620		(R)YAIDGK(S)	(R)Y/A\I|D G K(S)		666.346	-0.0045	-6.8
Group	Subgroup	Spectra	Distinct	Distinct	% AA	Total	Protein MW	Protein	Species	Database	Protein Name
(#)	(#)	(#)	Peptides	Summed	Coverage	Protein	(Da)	pI		Accession #
			(#)	MS/MS Search		Spectral
				Score		Intensity
133	133.1	1	1	5.06	7.5	3880	25514.6	9.26	CAEEL	Q94230
#	Filename	z	Score	Spectrum	Variable	Sequence	Sequence Map	Modifications	MH+	MH+	MH+
				Intensity	Sites			Map	Matched	Mass Shift	Error
									(Da)	(Da)	(ppm)
1	CSAKAZAKII48HA.7312.7312.3	3	5.06	3880		(R)IILSIVAAKAIVSEISK(M)	(R)I I L S I V A A K/A I V S/E I S/K(M)		1755.1	0.0344	19.6
Group	Subgroup	Spectra	Distinct	Distinct	% AA	Total	Protein MW	Protein	Species	Database	Protein Name
(#)	(#)	(#)	Peptides	Summed	Coverage	Protein	(Da)	pI		Accession #
			(#)	MS/MS Search		Spectral
				Score		Intensity
134	134.1	1	1	5.05	8.4	8560	28828.4	8.8	CAEEL	O01340
#	Filename	z	Score	Spectrum	Variable	Sequence	Sequence Map	Modifications	MH+	MH+	MH+
				Intensity	Sites			Map	Matched	Mass Shift	Error
									(Da)	(Da)	(ppm)
1	CSAKAZAKII48HC.4399.4399.3	3	5.05	8560		(K)DGGGAPAAAPAAAGGDKKPIQPNDK(N)	(K)D G G G A P A A A P/A A A/G G/D\K K\P I/Q P N D/K(N)		2274.15	-0.0139	-6.1
Group	Subgroup	Spectra	Distinct	Distinct	% AA	Total	Protein MW	Protein	Species	Database	Protein Name
(#)	(#)	(#)	Peptides	Summed	Coverage	Protein	(Da)	pI		Accession #
			(#)	MS/MS Search		Spectral
				Score		Intensity
135	135.1	1	1	4.98	7.1	22200	22535.6	9.02	CAEEL	Q4PJ11
#	Filename	z	Score	Spectrum	Variable	Sequence	Sequence Map	Modifications	MH+	MH+	MH+
				Intensity	Sites			Map	Matched	Mass Shift	Error
									(Da)	(Da)	(ppm)
1	CSAKAZAKII48HC.5038.5038.3	3	4.98	22200		(K)RECGLCIVTLCAQF(-)	(K)R E/C G\L C I V T L/C A Q F(-)	C:Carbamidomethylation	1726.81	0.032	18.6
Group	Subgroup	Spectra	Distinct	Distinct	% AA	Total	Protein MW	Protein	Species	Database	Protein Name
(#)	(#)	(#)	Peptides	Summed	Coverage	Protein	(Da)	pI		Accession #
			(#)	MS/MS Search		Spectral
				Score		Intensity
136	136.1	1	1	4.94	0.6	24800	139891	6.84	CAEEL	H2L0I5
#	Filename	z	Score	Spectrum	Variable	Sequence	Sequence Map	Modifications	MH+	MH+	MH+
				Intensity	Sites			Map	Matched	Mass Shift	Error
									(Da)	(Da)	(ppm)
1	CSAKAZAKII48HC.2940.2940.2	2	4.94	24800		(K)EMSPTVAK(I)	(K)E\M S P/T/V A K(I)		862.434	0.005	5.8
Group	Subgroup	Spectra	Distinct	Distinct	% AA	Total	Protein MW	Protein	Species	Database	Protein Name
(#)	(#)	(#)	Peptides	Summed	Coverage	Protein	(Da)	pI		Accession #
			(#)	MS/MS Search		Spectral
				Score		Intensity
137	137.1	1	1	4.8	0.7	368000	116039	9.33	CAEEL	O45813
#	Filename	z	Score	Spectrum	Variable	Sequence	Sequence Map	Modifications	MH+	MH+	MH+
				Intensity	Sites			Map	Matched	Mass Shift	Error
									(Da)	(Da)	(ppm)
1	CSAKAZAKII48HA.4335.4335.2	2	4.8	368000		(R)IQISKATR(L)	(R)I Q I\S\K A\T/R(L)		916.557	0.0098	10.7
Group	Subgroup	Spectra	Distinct	Distinct	% AA	Total	Protein MW	Protein	Species	Database	Protein Name
(#)	(#)	(#)	Peptides	Summed	Coverage	Protein	(Da)	pI		Accession #
			(#)	MS/MS Search		Spectral
				Score		Intensity
138	138.1	1	1	4.8	1.7	2290	46858.2	9.32	CAEEL	O61747
#	Filename	z	Score	Spectrum	Variable	Sequence	Sequence Map	Modifications	MH+	MH+	MH+
				Intensity	Sites			Map	Matched	Mass Shift	Error
									(Da)	(Da)	(ppm)
1	CSAKAZAKII48HA.3419.3419.2	2	4.8	2290		(R)STRTTTQK(R)	(R)S T|R T\T/T Q/K(R)		922.495	-0.0125	-13.6
Group	Subgroup	Spectra	Distinct	Distinct	% AA	Total	Protein MW	Protein	Species	Database	Protein Name
(#)	(#)	(#)	Peptides	Summed	Coverage	Protein	(Da)	pI		Accession #
			(#)	MS/MS Search		Spectral
				Score		Intensity
139	139.1	1	1	4.79	1.4	2460	71024.6	5.48	CAEEL	Q21374
#	Filename	z	Score	Spectrum	Variable	Sequence	Sequence Map	Modifications	MH+	MH+	MH+
				Intensity	Sites			Map	Matched	Mass Shift	Error
									(Da)	(Da)	(ppm)
1	CSAKAZAKII48HB.2988.2988.2	2	4.79	2460		(R)NTLSDENLK(M)	(R)N T|L S D/E/N L K(M)		1033.52	-0.0032	-3.1
Group	Subgroup	Spectra	Distinct	Distinct	% AA	Total	Protein MW	Protein	Species	Database	Protein Name
(#)	(#)	(#)	Peptides	Summed	Coverage	Protein	(Da)	pI		Accession #
			(#)	MS/MS Search		Spectral
				Score		Intensity
140	140.1	1	1	4.74	3	5850	37436.5	6.03	CAEEL	Q93596
#	Filename	z	Score	Spectrum	Variable	Sequence	Sequence Map	Modifications	MH+	MH+	MH+
				Intensity	Sites			Map	Matched	Mass Shift	Error
									(Da)	(Da)	(ppm)
1	CSAKAZAKII48HC.3395.3395.2	2	4.74	5850	M309m	(K)AVEHSDTmQK(M)	(K)A/V E H S D T/m Q/K(M)	m:Oxidized methionine	1145.53	16.0136	16.1
Group	Subgroup	Spectra	Distinct	Distinct	% AA	Total	Protein MW	Protein	Species	Database	Protein Name
(#)	(#)	(#)	Peptides	Summed	Coverage	Protein	(Da)	pI		Accession #
			(#)	MS/MS Search		Spectral
				Score		Intensity
141	141.1	1	1	4.73	1.1	10100	124748	9.21	CAEEL	P34339
#	Filename	z	Score	Spectrum	Variable	Sequence	Sequence Map	Modifications	MH+	MH+	MH+
				Intensity	Sites			Map	Matched	Mass Shift	Error
									(Da)	(Da)	(ppm)
1	CSAKAZAKII48HA.3803.3803.2	2	4.73	10100	M725m	(R)AVmNMRLSEAPK(L)	(R)A/V m/N M\R\L S E A/P K(L)	m:Oxidized methionine	1346.69	15.9775	-12.7
Group	Subgroup	Spectra	Distinct	Distinct	% AA	Total	Protein MW	Protein	Species	Database	Protein Name
(#)	(#)	(#)	Peptides	Summed	Coverage	Protein	(Da)	pI		Accession #
			(#)	MS/MS Search		Spectral
				Score		Intensity
142	142.1	1	1	4.7	7	1010	22455.3	8.83	CAEEL	Q18311
#	Filename	z	Score	Spectrum	Variable	Sequence	Sequence Map	Modifications	MH+	MH+	MH+
				Intensity	Sites			Map	Matched	Mass Shift	Error
									(Da)	(Da)	(ppm)
1	CSAKAZAKII48HA.4008.4008.3	3	4.7	1010		(K)QQLGGTKGGSNNGF(-)	(K)Q Q L G/G\T K G G S\N/N G\F(-)		1364.65	-0.0032	-2.4
Group	Subgroup	Spectra	Distinct	Distinct	% AA	Total	Protein MW	Protein	Species	Database	Protein Name
(#)	(#)	(#)	Peptides	Summed	Coverage	Protein	(Da)	pI		Accession #
			(#)	MS/MS Search		Spectral
				Score		Intensity
143	143.1	1	1	4.7	5.5	11100	48836.4	10.06	CAEEL	Q7YTQ3
#	Filename	z	Score	Spectrum	Variable	Sequence	Sequence Map	Modifications	MH+	MH+	MH+
				Intensity	Sites			Map	Matched	Mass Shift	Error
									(Da)	(Da)	(ppm)
1	CSAKAZAKII48HC.4709.4709.2	2	4.7	11100	M212m	(K)GALSYIHmTADVEMMFSDGFALK(M)	(K)G/A L S Y I H m T A D V E M M F S/D/G/F A L/K(M)	m:Oxidized methionine	2534.18	16.043	18.9
Group	Subgroup	Spectra	Distinct	Distinct	% AA	Total	Protein MW	Protein	Species	Database	Protein Name
(#)	(#)	(#)	Peptides	Summed	Coverage	Protein	(Da)	pI		Accession #
			(#)	MS/MS Search		Spectral
				Score		Intensity
144	144.1	1	1	4.61	1.4	12700	55261.6	5.96	CAEEL	G5ED07
#	Filename	z	Score	Spectrum	Variable	Sequence	Sequence Map	Modifications	MH+	MH+	MH+
				Intensity	Sites			Map	Matched	Mass Shift	Error
									(Da)	(Da)	(ppm)
1	CSAKAZAKII48HB.3810.3810.2	2	4.61	12700		(K)EDVIIAK(M)	(K)E/D V I/I/A K(M)		787.456	-0.0015	-1.9
Group	Subgroup	Spectra	Distinct	Distinct	% AA	Total	Protein MW	Protein	Species	Database	Protein Name
(#)	(#)	(#)	Peptides	Summed	Coverage	Protein	(Da)	pI		Accession #
			(#)	MS/MS Search		Spectral
				Score		Intensity
145	145.1	1	1	4.61	1.6	22600	103740	9.36	CAEEL	G5EFD9
#	Filename	z	Score	Spectrum	Variable	Sequence	Sequence Map	Modifications	MH+	MH+	MH+
				Intensity	Sites			Map	Matched	Mass Shift	Error
									(Da)	(Da)	(ppm)
1	CSAKAZAKII48HB.5064.5064.3	3	4.61	22600		(R)TSIYTPDSCDRGRAK(T)	(R)T|S I Y T/P\D S C D R G|R A K(T)	C:Carbamidomethylation	1726.82	0.0258	14.9
Group	Subgroup	Spectra	Distinct	Distinct	% AA	Total	Protein MW	Protein	Species	Database	Protein Name
(#)	(#)	(#)	Peptides	Summed	Coverage	Protein	(Da)	pI		Accession #
			(#)	MS/MS Search		Spectral
				Score		Intensity
146	146.1	1	1	4.55	13.9	8270	17634.6	9.1	CAEEL	C1P662
#	Filename	z	Score	Spectrum	Variable	Sequence	Sequence Map	Modifications	MH+	MH+	MH+
				Intensity	Sites			Map	Matched	Mass Shift	Error
									(Da)	(Da)	(ppm)
1	CSAKAZAKII48HA.4067.4067.3	3	4.55	8270		(K)NGVCGPDQVQNGDTVTQPNGK(K)	(K)N/G V C G P D Q V Q N G D T V/T Q P/N G K(K)	C:Carbamidomethylation	2184.99	0.0433	19.8
Group	Subgroup	Spectra	Distinct	Distinct	% AA	Total	Protein MW	Protein	Species	Database	Protein Name
(#)	(#)	(#)	Peptides	Summed	Coverage	Protein	(Da)	pI		Accession #
			(#)	MS/MS Search		Spectral
				Score		Intensity
147	147.1	1	1	4.55	3.4	16600	36876.1	5.84	CAEEL	Q9N4M7
#	Filename	z	Score	Spectrum	Variable	Sequence	Sequence Map	Modifications	MH+	MH+	MH+
				Intensity	Sites			Map	Matched	Mass Shift	Error
									(Da)	(Da)	(ppm)
1	CSAKAZAKII48HA.3981.3981.3	3	4.55	16600		(R)REEHNDRIGHK(N)	(R)R/E/E/H N D R I/G H K(N)		1390.69	0.0164	11.8
Group	Subgroup	Spectra	Distinct	Distinct	% AA	Total	Protein MW	Protein	Species	Database	Protein Name
(#)	(#)	(#)	Peptides	Summed	Coverage	Protein	(Da)	pI		Accession #
			(#)	MS/MS Search		Spectral
				Score		Intensity
148	148.1	1	1	4.54	0.7	65100	141252	8.57	CAEEL	Q09591
#	Filename	z	Score	Spectrum	Variable	Sequence	Sequence Map	Modifications	MH+	MH+	MH+
				Intensity	Sites			Map	Matched	Mass Shift	Error
									(Da)	(Da)	(ppm)
1	CSAKAZAKII48HB.8383.8403.2	2	4.54	65100		(K)KELTALLQK(A)	(K)K E L\T A L L Q/K(A)		1043.65	0.0201	19.2
Group	Subgroup	Spectra	Distinct	Distinct	% AA	Total	Protein MW	Protein	Species	Database	Protein Name
(#)	(#)	(#)	Peptides	Summed	Coverage	Protein	(Da)	pI		Accession #
			(#)	MS/MS Search		Spectral
				Score		Intensity
149	149.1	1	1	4.53	3.8	16600	37131.9	9.04	CAEEL	Q19584
#	Filename	z	Score	Spectrum	Variable	Sequence	Sequence Map	Modifications	MH+	MH+	MH+
				Intensity	Sites			Map	Matched	Mass Shift	Error
									(Da)	(Da)	(ppm)
1	CSAKAZAKII48HA.3876.3876.3	3	4.53	16600		(K)EASKAGQPSNVFR(G)	(K)E/A/S K A G/Q/P\S\N/V F\R(G)		1390.71	0.0024	1.8
Group	Subgroup	Spectra	Distinct	Distinct	% AA	Total	Protein MW	Protein	Species	Database	Protein Name
(#)	(#)	(#)	Peptides	Summed	Coverage	Protein	(Da)	pI		Accession #
			(#)	MS/MS Search		Spectral
				Score		Intensity
150	150.1	1	1	4.52	0.8	20700	179536	6.14	CAEEL	A0A0K3AQN0
#	Filename	z	Score	Spectrum	Variable	Sequence	Sequence Map	Modifications	MH+	MH+	MH+
				Intensity	Sites			Map	Matched	Mass Shift	Error
									(Da)	(Da)	(ppm)
1	CSAKAZAKII48HC.4838.4838.3	3	4.52	20700		(R)ASTNLIKEVISLRK(E)	(R)A S T N L I K E V I/S L R/K(E)		1571.95	-0.0092	-5.8
Group	Subgroup	Spectra	Distinct	Distinct	% AA	Total	Protein MW	Protein	Species	Database	Protein Name
(#)	(#)	(#)	Peptides	Summed	Coverage	Protein	(Da)	pI		Accession #
			(#)	MS/MS Search		Spectral
				Score		Intensity
151	151.1	1	1	4.51	1.1	33100	133344	6.24	CAEEL	A0A2K5ATP8
#	Filename	z	Score	Spectrum	Variable	Sequence	Sequence Map	Modifications	MH+	MH+	MH+
				Intensity	Sites			Map	Matched	Mass Shift	Error
									(Da)	(Da)	(ppm)
1	CSAKAZAKII48HC.3972.3972.2	2	4.51	33100		(R)SLQSGPSNITDTSK(M)	(R)S L Q S G/P S N I T/D T/S K(M)		1434.71	-0.0034	-2.4
Group	Subgroup	Spectra	Distinct	Distinct	% AA	Total	Protein MW	Protein	Species	Database	Protein Name
(#)	(#)	(#)	Peptides	Summed	Coverage	Protein	(Da)	pI		Accession #
			(#)	MS/MS Search		Spectral
				Score		Intensity
152	152.1	1	1	4.5	1.5	15800	81594.8	6.04	CAEEL	Q22145
#	Filename	z	Score	Spectrum	Variable	Sequence	Sequence Map	Modifications	MH+	MH+	MH+
				Intensity	Sites			Map	Matched	Mass Shift	Error
									(Da)	(Da)	(ppm)
1	CSAKAZAKII48HC.3978.3978.3	3	4.5	15800	M493m	(K)ERMKEIGmRPK(G)	(K)E R/M K E/I/G m R\P K(G)	m:Oxidized methionine	1374.73	15.9712	-17.1
Group	Subgroup	Spectra	Distinct	Distinct	% AA	Total	Protein MW	Protein	Species	Database	Protein Name
(#)	(#)	(#)	Peptides	Summed	Coverage	Protein	(Da)	pI		Accession #
			(#)	MS/MS Search		Spectral
				Score		Intensity
153	153.1	1	1	4.49	6.6	59700	17429.7	6.77	CAEEL	Q20424
#	Filename	z	Score	Spectrum	Variable	Sequence	Sequence Map	Modifications	MH+	MH+	MH+
				Intensity	Sites			Map	Matched	Mass Shift	Error
									(Da)	(Da)	(ppm)
1	CSAKAZAKII48HC.9576.9576.2	2	4.49	59700		(K)LARNLILKIR(N)	(K)L A R N L I/L\K I/R(N)		1209.82	-0.0151	-12.4
Group	Subgroup	Spectra	Distinct	Distinct	% AA	Total	Protein MW	Protein	Species	Database	Protein Name
(#)	(#)	(#)	Peptides	Summed	Coverage	Protein	(Da)	pI		Accession #
			(#)	MS/MS Search		Spectral
				Score		Intensity
154	154.1	1	1	4.48	1.9	18300	37267.8	9.47	CAEEL	Q9N5I2
#	Filename	z	Score	Spectrum	Variable	Sequence	Sequence Map	Modifications	MH+	MH+	MH+
				Intensity	Sites			Map	Matched	Mass Shift	Error
									(Da)	(Da)	(ppm)
1	CSAKAZAKII48HC.2878.2878.2	2	4.48	18300		(K)SITPIN(-)	(K)S/I|T P I/N(-)		644.361	0.0095	14.7
Group	Subgroup	Spectra	Distinct	Distinct	% AA	Total	Protein MW	Protein	Species	Database	Protein Name
(#)	(#)	(#)	Peptides	Summed	Coverage	Protein	(Da)	pI		Accession #
			(#)	MS/MS Search		Spectral
				Score		Intensity
155	155.1	1	1	4.46	4.5	53600	46776.7	7.82	CAEEL	H2L0B0
#	Filename	z	Score	Spectrum	Variable	Sequence	Sequence Map	Modifications	MH+	MH+	MH+
				Intensity	Sites			Map	Matched	Mass Shift	Error
									(Da)	(Da)	(ppm)
1	CSAKAZAKII48HB.4011.4011.2	2	4.46	53600	M131m M136m	(R)EIVHRmDGFSmFLKPAPR(G)	(R)E I V H R m\D G|F S m/F\L K P A P R(G)	m:Oxidized methionine	2131.09	31.9555	-15.8
Group	Subgroup	Spectra	Distinct	Distinct	% AA	Total	Protein MW	Protein	Species	Database	Protein Name
(#)	(#)	(#)	Peptides	Summed	Coverage	Protein	(Da)	pI		Accession #
			(#)	MS/MS Search		Spectral
				Score		Intensity
156	156.1	2	1	4.44	7.6	14500	15599.5	9.49	CAEEL	Q9XXR5
#	Filename	z	Score	Spectrum	Variable	Sequence	Sequence Map	Modifications	MH+	MH+	MH+
				Intensity	Sites			Map	Matched	Mass Shift	Error
									(Da)	(Da)	(ppm)
1	CSAKAZAKII48HB.3416.3416.2	2	4.44	7240	M50m	(K)mYEDGTFYDSK(M)	(K)m\Y E D G T F Y/D|S|K(M)	m:Oxidized methionine	1355.55	16.0026	5.6
2	CSAKAZAKII48HB.3426.3426.2	2	4.23	7240	M50m	(K)mYEDGTFYDSK(M)	(K)m Y E D G T/F/Y|D|S/K(M)	m:Oxidized methionine	1355.55	16.0026	5.6
Group	Subgroup	Spectra	Distinct	Distinct	% AA	Total	Protein MW	Protein	Species	Database	Protein Name
(#)	(#)	(#)	Peptides	Summed	Coverage	Protein	(Da)	pI		Accession #
			(#)	MS/MS Search		Spectral
				Score		Intensity
157	157.1	1	1	4.42	12	2000	8753	6.56	CAEEL	Q8WQC1
#	Filename	z	Score	Spectrum	Variable	Sequence	Sequence Map	Modifications	MH+	MH+	MH+
				Intensity	Sites			Map	Matched	Mass Shift	Error
									(Da)	(Da)	(ppm)
1	CSAKAZAKII48HC.2799.2799.2	2	4.42	2000		(K)SMTHVNCLR(I)	(K)S M T H\V/N\C L|R(I)	C:Carbamidomethylation	1117.52	0.0003	0.3
Group	Subgroup	Spectra	Distinct	Distinct	% AA	Total	Protein MW	Protein	Species	Database	Protein Name
(#)	(#)	(#)	Peptides	Summed	Coverage	Protein	(Da)	pI		Accession #
			(#)	MS/MS Search		Spectral
				Score		Intensity
158	158.1	1	1	4.39	4.3	26500	33443	9.91	CAEEL	Q21084
#	Filename	z	Score	Spectrum	Variable	Sequence	Sequence Map	Modifications	MH+	MH+	MH+
				Intensity	Sites			Map	Matched	Mass Shift	Error
									(Da)	(Da)	(ppm)
1	CSAKAZAKII48HC.3344.3344.3	3	4.39	26500		(R)MQDHNTDSRGVWK(T)	(R)M/Q D H N|T D S R G/V W K(T)		1573.72	-0.0091	-5.8
Group	Subgroup	Spectra	Distinct	Distinct	% AA	Total	Protein MW	Protein	Species	Database	Protein Name
(#)	(#)	(#)	Peptides	Summed	Coverage	Protein	(Da)	pI		Accession #
			(#)	MS/MS Search		Spectral
				Score		Intensity
159	159.1	1	1	4.39	1.2	117000	64769.2	8.32	CAEEL	Q9N4M3
#	Filename	z	Score	Spectrum	Variable	Sequence	Sequence Map	Modifications	MH+	MH+	MH+
				Intensity	Sites			Map	Matched	Mass Shift	Error
									(Da)	(Da)	(ppm)
1	CSAKAZAKII48HC.11500.11500.2	2	4.39	117000		(K)KLLISRK(T)	(K)K/L L|I S R\K(T)		857.593	-0.0054	-6.3
Group	Subgroup	Spectra	Distinct	Distinct	% AA	Total	Protein MW	Protein	Species	Database	Protein Name
(#)	(#)	(#)	Peptides	Summed	Coverage	Protein	(Da)	pI		Accession #
			(#)	MS/MS Search		Spectral
				Score		Intensity
160	160.1	1	1	4.36	0.3	4630	323152	7.54	CAEEL	G5EFC7
#	Filename	z	Score	Spectrum	Variable	Sequence	Sequence Map	Modifications	MH+	MH+	MH+
				Intensity	Sites			Map	Matched	Mass Shift	Error
									(Da)	(Da)	(ppm)
1	CSAKAZAKII48HA.4003.4003.2	2	4.36	4630	M1901m	(K)RINEICDLmGK(I)	(K)R/I\N E I C D L m G/K(I)	C:Carbamidomethylation	1348.67	15.9875	-5.5
								m:Oxidized methionine
Group	Subgroup	Spectra	Distinct	Distinct	% AA	Total	Protein MW	Protein	Species	Database	Protein Name
(#)	(#)	(#)	Peptides	Summed	Coverage	Protein	(Da)	pI		Accession #
			(#)	MS/MS Search		Spectral
				Score		Intensity
161	161.1	1	1	4.33	9	131000	16740.7	8.01	CAEEL	P91214
#	Filename	z	Score	Spectrum	Variable	Sequence	Sequence Map	Modifications	MH+	MH+	MH+
				Intensity	Sites			Map	Matched	Mass Shift	Error
									(Da)	(Da)	(ppm)
1	CSAKAZAKII48HB.5303.5303.3	3	4.33	131000		(K)MIVAPLSYSDASAK(C)	(K)M I V\A P L/S Y S/D/A S A K(C)		1452.74	-0.0218	-15
Group	Subgroup	Spectra	Distinct	Distinct	% AA	Total	Protein MW	Protein	Species	Database	Protein Name
(#)	(#)	(#)	Peptides	Summed	Coverage	Protein	(Da)	pI		Accession #
			(#)	MS/MS Search		Spectral
				Score		Intensity
162	162.1	1	1	4.3	1.2	31900	74303.1	9.33	CAEEL	Q9TYV5
#	Filename	z	Score	Spectrum	Variable	Sequence	Sequence Map	Modifications	MH+	MH+	MH+
				Intensity	Sites			Map	Matched	Mass Shift	Error
									(Da)	(Da)	(ppm)
1	CSAKAZAKII48HA.10357.10357.2	2	4.3	31900		(K)KKVSAASK(A)	(K)K/K V\S/A/A/S K(A)		818.509	0.0119	14.5
Group	Subgroup	Spectra	Distinct	Distinct	% AA	Total	Protein MW	Protein	Species	Database	Protein Name
(#)	(#)	(#)	Peptides	Summed	Coverage	Protein	(Da)	pI		Accession #
			(#)	MS/MS Search		Spectral
				Score		Intensity
163	163.1	1	1	4.27	4.9	16800	13747.8	9.95	CAEEL	Q9N4Z4
#	Filename	z	Score	Spectrum	Variable	Sequence	Sequence Map	Modifications	MH+	MH+	MH+
				Intensity	Sites			Map	Matched	Mass Shift	Error
									(Da)	(Da)	(ppm)
1	CSAKAZAKII48HB.10281.10281.2	2	4.27	16800		(K)LSKHTK(K)	(K)L S/K\H/T/K(K)		713.43	-0.001	-1.4
Group	Subgroup	Spectra	Distinct	Distinct	% AA	Total	Protein MW	Protein	Species	Database	Protein Name
(#)	(#)	(#)	Peptides	Summed	Coverage	Protein	(Da)	pI		Accession #
			(#)	MS/MS Search		Spectral
				Score		Intensity
164	164.1	1	1	4.25	3.7	1960	41851.8	8.95	CAEEL	Q8IG38
#	Filename	z	Score	Spectrum	Variable	Sequence	Sequence Map	Modifications	MH+	MH+	MH+
				Intensity	Sites			Map	Matched	Mass Shift	Error
									(Da)	(Da)	(ppm)
1	CSAKAZAKII48HA.3769.3769.2	2	4.25	1960		(K)SSKCSAVNRQVEK(N)	(K)S S K C S A/V N R Q V E/K(N)	C:Carbamidomethylation	1492.75	-0.0277	-18.5
Group	Subgroup	Spectra	Distinct	Distinct	% AA	Total	Protein MW	Protein	Species	Database	Protein Name
(#)	(#)	(#)	Peptides	Summed	Coverage	Protein	(Da)	pI		Accession #
			(#)	MS/MS Search		Spectral
				Score		Intensity
165	165.1	1	1	4.2	8.5	1650	14083.6	4.68	CAEEL	Q95YB3
#	Filename	z	Score	Spectrum	Variable	Sequence	Sequence Map	Modifications	MH+	MH+	MH+
				Intensity	Sites			Map	Matched	Mass Shift	Error
									(Da)	(Da)	(ppm)
1	CSAKAZAKII48HA.3026.3026.2	2	4.2	1650		(R)TGVGQDDPDR(E)	(R)T G|V G Q D D P D R(E)		1059.47	-0.0048	-4.6
Group	Subgroup	Spectra	Distinct	Distinct	% AA	Total	Protein MW	Protein	Species	Database	Protein Name
(#)	(#)	(#)	Peptides	Summed	Coverage	Protein	(Da)	pI		Accession #
			(#)	MS/MS Search		Spectral
				Score		Intensity
166	166.1	1	1	4.12	1.3	20400	117666	4.92	CAEEL	G5EC21
#	Filename	z	Score	Spectrum	Variable	Sequence	Sequence Map	Modifications	MH+	MH+	MH+
				Intensity	Sites			Map	Matched	Mass Shift	Error
									(Da)	(Da)	(ppm)
1	CSAKAZAKII48HA.4304.4304.2	2	4.12	20400		(K)GGAGNGKSGDGSGDGK(N)	(K)G/G A G N G\K S G D/G S G D G/K(N)		1320.58	-0.0004	-0.3
Group	Subgroup	Spectra	Distinct	Distinct	% AA	Total	Protein MW	Protein	Species	Database	Protein Name
(#)	(#)	(#)	Peptides	Summed	Coverage	Protein	(Da)	pI		Accession #
			(#)	MS/MS Search		Spectral
				Score		Intensity
167	167.1	1	1	4.07	2.1	3530	70112.2	6.24	CAEEL	Q9N303
#	Filename	z	Score	Spectrum	Variable	Sequence	Sequence Map	Modifications	MH+	MH+	MH+
				Intensity	Sites			Map	Matched	Mass Shift	Error
									(Da)	(Da)	(ppm)
1	CSAKAZAKII48HB.4747.4747.2	2	4.07	3530		(R)VVPASIRGLFVDK(E)	(R)V V\P/A S I R G L F V D K(E)		1400.83	0.0251	17.9
Group	Subgroup	Spectra	Distinct	Distinct	% AA	Total	Protein MW	Protein	Species	Database	Protein Name
(#)	(#)	(#)	Peptides	Summed	Coverage	Protein	(Da)	pI		Accession #
			(#)	MS/MS Search		Spectral
				Score		Intensity
168	168.1	1	1	4.06	2.6	2080	39632.2	9.2	CAEEL	Q9GUE5
#	Filename	z	Score	Spectrum	Variable	Sequence	Sequence Map	Modifications	MH+	MH+	MH+
				Intensity	Sites			Map	Matched	Mass Shift	Error
									(Da)	(Da)	(ppm)
1	CSAKAZAKII48HA.3400.3400.2	2	4.06	2080		(K)RPSTILNPK(T)	(K)R P S|T I/L N P K(T)		1025.61	-0.0087	-8.5
Group	Subgroup	Spectra	Distinct	Distinct	% AA	Total	Protein MW	Protein	Species	Database	Protein Name
(#)	(#)	(#)	Peptides	Summed	Coverage	Protein	(Da)	pI		Accession #
			(#)	MS/MS Search		Spectral
				Score		Intensity
169	169.1	1	1	3.98	2.9	32700	50289	7.15	CAEEL	Q20755
#	Filename	z	Score	Spectrum	Variable	Sequence	Sequence Map	Modifications	MH+	MH+	MH+
				Intensity	Sites			Map	Matched	Mass Shift	Error
									(Da)	(Da)	(ppm)
1	CSAKAZAKII48HB.3994.3994.2	2	3.98	32700		(R)QPSDSVLADEFVK(R)	(R)Q P/S D\S V L A D E F V/K(R)		1434.71	-0.0014	-1
Group	Subgroup	Spectra	Distinct	Distinct	% AA	Total	Protein MW	Protein	Species	Database	Protein Name
(#)	(#)	(#)	Peptides	Summed	Coverage	Protein	(Da)	pI		Accession #
			(#)	MS/MS Search		Spectral
				Score		Intensity
170	170.1	1	1	3.97	2.8	141000	33664.2	7.83	CAEEL	Q22254
#	Filename	z	Score	Spectrum	Variable	Sequence	Sequence Map	Modifications	MH+	MH+	MH+
				Intensity	Sites			Map	Matched	Mass Shift	Error
									(Da)	(Da)	(ppm)
1	CSAKAZAKII48HB.4520.4520.2	2	3.97	141000		(R)RVSPTFQLK(C)	(R)R V S P\T F/Q/L K(C)		1075.63	0.0164	15.2
Group	Subgroup	Spectra	Distinct	Distinct	% AA	Total	Protein MW	Protein	Species	Database	Protein Name
(#)	(#)	(#)	Peptides	Summed	Coverage	Protein	(Da)	pI		Accession #
			(#)	MS/MS Search		Spectral
				Score		Intensity
171	171.1	1	1	3.96	7.1	3650	19398.1	4.44	CAEEL	Q9XX92
#	Filename	z	Score	Spectrum	Variable	Sequence	Sequence Map	Modifications	MH+	MH+	MH+
				Intensity	Sites			Map	Matched	Mass Shift	Error
									(Da)	(Da)	(ppm)
1	CSAKAZAKII48HC.4832.4832.3	3	3.96	3650		(K)IIKYWFLTKILR(R)	(K)I I K Y W/F L\T/K I L|R(R)		1593.99	-0.002	-1.3
Group	Subgroup	Spectra	Distinct	Distinct	% AA	Total	Protein MW	Protein	Species	Database	Protein Name
(#)	(#)	(#)	Peptides	Summed	Coverage	Protein	(Da)	pI		Accession #
			(#)	MS/MS Search		Spectral
[truncated: 512 more rows]

## Sheet: Protein-Protein Comparision
Spectrum Mill - Protein Peptide/Summary
Results Shown Filtered by Validation Category: sequence-not-validated
Data Directory: msdataSM\CSAKAZAKII48HA - SpecFeatures read
Retrieving all hits from tagSummary file.
all hits read from tagSummary file num hits: 165
original hits subset determined from files: 100 Files: 100 Hits: 163
Data Directory: msdataSM\CSAKAZAKII48HB - SpecFeatures read
Retrieving all hits from tagSummary file.
all hits read from tagSummary file num hits: 175
original hits subset determined from files: 99 Files: 99 Hits: 172
Data Directory: msdataSM\CSAKAZAKII48HC - SpecFeatures read
Retrieving all hits from tagSummary file.
all hits read from tagSummary file num hits: 141
original hits subset determined from files: 101 Files: 101 Hits: 141
beginning to assemble proteins .... proteins assembled 0.014995 sec
proteins filtered by distinct peptides 0.005252 sec
proteins filtered by score
calculated protein coverage maps 0.154166 sec
beginning to roll up 361 proteins into groups ...
Sorted peptides by length to accelerate peptide roll up 0.005006 sec
completed primary peptide roll up 3837 sequence comparisons 0.065087 sec
completed post roll up subgrouping and sorting 0.004474 sec
Finished protein roll up into 228 groups 0.075866 sec
protein groups ready for display
proteinGroupingMethod: oneSharedPeptideSubgrouped Subgroups expanded 8.82e-002 sec
total intensity: sum of intensity for all spectra of peptides belonging to protein
CSAKAZAKII48HA	CSAKAZAKII48HB	CSAKAZAKII48HC	Columns	Spectra	Protein MW	Protein	Species	# Rank 1	# Shared	# Shared	Shared	# Distinct	# Distinct	Distinct	# Distinct	Database	%AA	Distinct	Distinct	Group	Subgroup	Protein Name
# spectra	# spectra	# spectra	Protein	Protein	(Da)	pI		Species Present	Peptides	Spectra	Total	Peptides	Spectra	Total	Peptides Species 2	Accession #	Coverage	Peptides	Summed	#	#
total intensity	total intensity	total intensity	Observed	Observed							Intensity	Species 1	Species 1	Intensity				(#CI)	MS/MS Search
			(#)	(#)										Species 1					Score
1	4	1	3	6	42137.4	5.3	CAEEL	1			0	3	6	48500	0	P0DM41	6.3	3	24.24	1	1.1
16800	29500	2250
1	2	0	2	3	87766.2	9.17	CAEEL	1			0	2	2	201000	0	B7FAS5	1.6	2	16.51	2	2.1
105000	193000	0
2	3	3	3	8	53610.1	6.17	CAEEL	1			0	1	8	3070000	0	Q09400	1.2	1	16.18	3	3.1
702000	1250000	1110000
3	2	2	3	7	63688.4	5.62	CAEEL	1			0	1	7	731000	0	Q9N4P3	1	1	15.18	4	4.1
303000	218000	210000
1	2	1	3	4	38009.2	8.8	CAEEL	1			0	1	4	92100	0	V6CLB7	1.8	1	12.86	5	5.1
17100	51600	23400
0	0	1	1	1	109608	4.37	CAEEL	1			0	1	1	75700	0	Q09560	0.9	1	12.57	6	6.1
0	0	75700
0	0	1	1	1	118489	8.8	CAEEL	1			0	1	1	468	0	A0A0K3AV08	1.7	1	12.14	7	7.1
0	0	468
0	1	1	2	2	22641.4	9.43	CAEEL	1			0	1	2	45400	0	Q19022	2.9	1	11.89	8	8.1
0	23200	22200
0	0	1	1	1	59599	6.29	CAEEL	1			0	1	1	4530	0	Q23487	1.7	1	11.86	9	9.1
0	0	4530
1	1	0	2	2	47695.2	5.03	CAEEL	1			0	1	2	71100	0	O61882	2.8	1	11.68	10	10.1
31900	39200	0
1	0	1	2	2	29505.6	8.98	CAEEL	1			0	1	2	29400	0	Q9N3Z0	4.9	1	11.12	11	11.1
17300	0	12100
1	0	1	2	2	476776	5.81	CAEEL	1			0	2	2	20900	0	Q19542	0.6	2	11.05	12	12.1
17300	0	3650
1	0	1	2	2	130903	6.01	CAEEL	1			0	2	2	36000	0	Q21049	1.6	2	10.42	13	13.1
7760	0	28300
0	0	1	1	1	22329.6	4.27	CAEEL	1			0	1	1	17100	0	G5EFR2	6.2	1	10.39	14	14.1
0	0	17100
2	0	0	1	2	52330.5	9.59	CAEEL	1			0	1	2	33200	0	G8JYE5	3	1	10.22	15	15.1
33200	0	0
0	1	1	2	2	30985	4.73	CAEEL	1			0	1	2	9230	0	Q9N522	8.3	1	10.22	16	16.1
0	4750	4490
1	1	0	2	2	31791.1	9.38	CAEEL	1			0	1	2	177000	0	G5EFI9	3.2	1	10.19	17	17.1
97800	78900	0
0	0	1	1	1	66166.3	5.93	CAEEL	1			0	1	1	1830	0	Q93794	2.5	1	10.11	18	18.1
0	0	1830
0	0	1	1	1	179856	5.9	CAEEL	1			0	1	1	110000	0	Q9XW25	0.4	1	10.1	19	19.1
0	0	110000
0	0	1	1	1	40667.8	7.83	CAEEL	1			0	1	1	75700	0	O62116	2.5	1	9.95	20	20.1
0	0	75700
1	0	0	1	1	461741	5.2	CAEEL	1			0	1	1	22800	0	H2L075	0.1	1	9.94	21	21.1
22800	0	0
1	0	0	1	1	49975.6	8.92	CAEEL	1			0	1	1	3450	0	Q23571	1.3	1	9.9	22	22.1
3450	0	0
0	0	1	1	1	30135.3	9	CAEEL	1			0	1	1	7680	0	Q94165	4.2	1	9.86	23	23.1
0	0	7680
1	0	0	1	1	110510	5.89	CAEEL	1			0	1	1	97800	0	Q9N3Q5	0.9	1	9.77	24	24.1
97800	0	0
1	2	2	3	5	74997.9	8.26	CAEEL	1			0	1	5	318000	0	O62139	2.7	1	9.71	25	25.1
65900	120000	132000
0	2	1	2	3	87806	9.84	CAEEL	1			0	1	3	63900	0	Q11188	1.3	1	9.62	26	26.1
0	44800	19100
0	0	2	1	2	47543.9	9.37	CAEEL	1			0	1	2	5410	0	G8JY74	2.5	1	9.36	27	27.1
0	0	5410
2	1	1	3	4	78385	9.23	CAEEL	1			0	1	4	141000	0	Q8MNV7	1.8	1	9.36	28	28.1
84900	15500	40400
0	1	0	1	1	111952	9.36	CAEEL	1			0	1	1	131000	0	Q9GYL4	1.4	1	9.35	29	29.1
0	131000	0
1	1	1	3	3	36175.7	8.5	CAEEL	1			0	1	3	765000	0	O62515	2.8	1	9.25	30	30.1
277000	242000	246000
1	0	0	1	1	270128	5.65	CAEEL	1			0	1	1	65900	0	G5EGK6	0.8	1	9	31	31.1
65900	0	0
2	0	1	2	3	55695.2	11.42	CAEEL	1			0	1	3	817000	0	Q09633	1.5	1	8.96	32	32.1
525000	0	292000
1	1	1	3	3	16407.1	7.92	CAEEL	1			0	1	3	697000	0	Q9N3I5	3.5	1	8.94	33	33.1
218000	232000	246000
1	0	0	1	1	43187.7	9.08	CAEEL	1			0	1	1	27000	0	P91501	3.2	1	8.91	34	34.1
27000	0	0
0	1	1	2	2	93067.2	5.18	CAEEL	1			0	2	2	20300	0	O62505	3.3	2	8.87	35	35.1
0	19000	1320
0	0	1	1	1	43108.5	6.16	CAEEL	1			0	1	1	14000	0	H2L0L6	1.6	1	8.67	36	36.1
0	0	14000
0	1	0	1	1	62439.7	9.54	CAEEL	1			0	1	1	78900	0	Q19893	1.5	1	8.6	37	37.1
0	78900	0
0	2	1	2	3	39478.2	6.48	CAEEL	1			0	1	3	295000	0	G5EGG8	2.2	1	8.57	38	38.1
0	185000	110000
0	1	0	1	1	68832.6	5.78	CAEEL	1			0	1	1	23500	0	Q19266	2.8	1	8.53	39	39.1
0	23500	0
0	1	0	1	1	73969.4	5.3	CAEEL	1			0	1	1	2310	0	Q93534	3.4	1	8.46	40	40.1
0	2310	0
1	0	0	1	1	172524	4.59	CAEEL	1			0	1	1	3470	0	P17139	1	1	8.27	41	41.1
3470	0	0
0	1	0	1	1	33426.1	10.11	CAEEL	1			0	1	1	8580	0	P34680	3.7	1	8.23	42	42.1
0	8580	0
0	1	0	1	1	48350.7	6.79	CAEEL	1			0	1	1	16000	0	A0A061AKU6	1.4	1	8.21	43	43.1
0	16000	0
2	0	0	1	2	100486	4.58	CAEEL	1			0	1	2	52400	0	A0A1I6CMA1	1	1	8.11	44	44.1
52400	0	0
0	0	1	1	1	182575	8.95	CAEEL	1			0	1	1	75700	0	Q9U263	0.6	1	8.05	45	45.1
0	0	75700
1	2	1	3	4	91269.8	9.37	CAEEL	1			0	1	4	1070000	0	O61794	0.9	1	8.01	46	46.1
262000	511000	292000
0	0	1	1	1	30302.5	6.95	CAEEL	1			0	1	1	17100	0	Q9XX63	5	1	7.99	47	47.1
0	0	17100
0	0	1	1	1	43646.1	9.7	CAEEL	1			0	1	1	3700	0	H2KZT2	4.7	1	7.91	48	48.1
0	0	3700
0	0	1	1	1	69651.3	6.57	CAEEL	1			0	1	1	17100	0	G5EFL1	2.1	1	7.89	49	49.1
0	0	17100
0	1	0	1	1	32018.6	5.78	CAEEL	1			0	1	1	885	0	A0A131MBE3	4.6	1	7.81	50	50.1
0	885	0
1	0	0	1	1	85072.4	8.52	CAEEL	1			0	1	1	14800	0	G5EEA7	1.7	1	7.81	51	51.1
14800	0	0
0	1	0	1	1	75979.5	9.98	CAEEL	1			0	1	1	4750	0	Q8I4G4	3.2	1	7.71	52	52.1
0	4750	0
1	0	0	1	1	14233.5	12.07	CAEEL	1			0	1	1	6020	0	I7LHV7	8.4	1	7.7	53	53.1
6020	0	0
0	0	1	1	1	42523.7	10.31	CAEEL	1			0	1	1	17900	0	Q7YXB5	3.9	1	7.7	54	54.1
0	0	17900
1	0	0	1	1	36553	7.81	CAEEL	1			0	1	1	16600	0	P04970	3.5	1	7.61	55	55.1
16600	0	0
1	0	0	1	1	6560.2	10.93	CAEEL	1			0	1	1	16500	0	H2KML2	16.9	1	7.52	56	56.1
16500	0	0
1	0	0	1	1	39284.3	8.41	CAEEL	1			0	1	1	16100	0	O44517	3.8	1	7.52	57	57.1
16100	0	0
1	0	0	1	1	32727.4	9.31	CAEEL	1			0	1	1	233000	0	G5ECX9	3.9	1	7.42	58	58.1
233000	0	0
1	0	0	1	1	24665	6.33	CAEEL	1			0	1	1	3640	0	Q19660	3	1	7.4	59	59.1
3640	0	0
0	0	1	1	1	31397.2	9.25	CAEEL	1			0	1	1	7740	0	E3CTH5	3.9	1	7.35	60	60.1
0	0	7740
0	1	0	1	1	54636.5	5.1	CAEEL	1			0	1	1	22400	0	O18195	2.6	1	7.31	61	61.1
0	22400	0
1	1	0	2	2	55502.8	6.31	CAEEL	1			0	1	2	186000	0	Q09989	1.6	1	7.26	62	62.1
93900	92300	0
0	1	0	1	1	72371.7	6.36	CAEEL	1			0	1	1	15100	0	Q9Y1J3	1.8	1	7.13	63	63.1
0	15100	0
0	1	0	1	1	388048	5.04	CAEEL	1			0	1	1	4560	0	A0A1N7SYN2	0.3	1	7	64	64.1
0	4560	0
0	1	0	1	1	46416	6.43	CAEEL	1			0	1	1	15100	0	Q09270	3	1	6.97	65	65.1
0	15100	0
0	0	1	1	1	44974.1	9.23	CAEEL	1			0	1	1	2030	0	Q9GZG1	4.8	1	6.91	66	66.1
0	0	2030
0	1	1	2	2	71262.5	9.73	CAEEL	1			0	1	2	293000	0	Q9TYX6	2.2	1	6.79	67	67.1
0	131000	162000
0	0	1	1	1	43595.5	9.14	CAEEL	1			0	1	1	14800	0	Q9U366	3.4	1	6.79	68	68.1
0	0	14800
0	1	0	1	1	74089.8	8.98	CAEEL	1			0	1	1	9410	0	Q21157	1.6	1	6.78	69	69.1
0	9410	0
0	0	1	1	1	22901.2	6.25	CAEEL	1			0	1	1	1230	0	Q9NA97	3.3	1	6.71	70	70.1
0	0	1230
0	1	0	1	1	206684	6.59	CAEEL	1			0	1	1	3550	0	B6VQ59	0.6	1	6.67	71	71.1
0	3550	0
1	0	0	1	1	23470.7	10.24	CAEEL	1			0	1	1	3410	0	P49391	9.5	1	6.56	72	72.1
3410	0	0
0	1	0	1	1	545358	4.92	CAEEL	1			0	1	1	16900	0	Q04833	0.2	1	6.53	73	73.1
0	16900	0
0	0	1	1	1	45367.3	8.38	CAEEL	1			0	1	1	8000	0	Q22401	4.2	1	6.53	74	74.1
0	0	8000
0	1	1	2	2	72014.6	5	CAEEL	1			0	1	2	21200	0	Q9XU06	1.9	1	6.53	75	75.1
0	2060	19200
0	1	0	1	1	51746.1	6.51	CAEEL	1			0	1	1	26200	0	Q9TZE1	1.7	1	6.48	76	76.1
0	26200	0
0	0	2	1	2	98412.1	6.58	CAEEL	1			0	1	2	324000	0	P34537	1.3	1	6.47	77	77.1
0	0	324000
0	0	1	1	1	27025.1	9.81	CAEEL	1			0	1	1	1010	0	G3MU69	3.3	1	6.43	78	78.1
0	0	1010
1	0	0	1	1	14115.2	7.93	CAEEL	1			0	1	1	1600	0	Q21568	9.3	1	6.43	79	79.1
1600	0	0
0	1	0	1	1	84923.3	9.37	CAEEL	1			0	1	1	53600	0	Q21376	1.5	1	6.42	80	80.1
0	53600	0
0	1	0	1	1	70837.2	5.42	CAEEL	1			0	1	1	4550	0	O45246	2.1	1	6.41	81	81.1
0	4550	0
1	0	0	1	1	21443.3	9.42	CAEEL	1			0	1	1	1530	0	G5EG43	3.6	1	6.4	82	82.1
1530	0	0
0	1	0	1	1	129264	6.74	CAEEL	1			0	1	1	2840	0	Q09564	1.7	1	6.4	83	83.1
0	2840	0
0	1	0	1	1	34255.3	9.85	CAEEL	1			0	1	1	16000	0	E1B6T1	3.3	1	6.36	84	84.1
0	16000	0
0	1	0	1	1	45159.7	8.74	CAEEL	1			0	1	1	52800	0	Q22347	2.6	1	6.33	85	85.1
0	52800	0
1	0	0	1	1	61407.8	9.55	CAEEL	1			0	1	1	149000	0	H2KYE7	2.2	1	6.27	86	86.1
149000	0	0
1	0	0	1	1	95296	7.72	CAEEL	1			0	1	1	1550	0	H2L060	2.4	1	6.24	87	87.1
1550	0	0
1	0	0	1	1	10841	6.05	CAEEL	1			0	1	1	31900	0	Q23428	13.6	1	6.23	88	88.1
31900	0	0
0	0	1	1	1	38678	8.61	CAEEL	1			0	1	1	14000	0	O76719	3.5	1	6.22	89	89.1
0	0	14000
0	1	0	1	1	47818.8	5.1	CAEEL	1			0	1	1	2060	0	G5EDL7	2.6	1	6.16	90	90.1
0	2060	0
1	1	1	3	3	94171.3	6.19	CAEEL	1			0	1	3	171000	0	O17744	2.4	1	6.16	91	91.1
57800	53600	59200
0	0	1	1	1	231090	9.01	CAEEL	1			0	1	1	22700	0	O16237	0.4	1	6.04	92	92.1
0	0	22700
2	3	0	2	5	136062	9.56	CAEEL	1			0	1	5	116000	0	Q23260	1.1	1	5.98	93	93.1
38500	77500	0
1	0	0	1	1	107121	4.89	CAEEL	1			0	1	1	2650	0	G5EDT4	0.8	1	5.97	94	94.1
2650	0	0
0	1	0	1	1	40152.9	9.67	CAEEL	1			0	1	1	5500	0	Q9GRY7	2.6	1	5.93	95	95.1
0	5500	0
0	1	0	1	1	21366.4	10.89	CAEEL	1			0	1	1	15100	0	P10771	6.2	1	5.92	96	96.1
0	15100	0
0	0	1	1	1	13835.1	8.23	CAEEL	1			0	1	1	162000	0	Q7YWP1	10	1	5.89	97	97.1
0	0	162000
0	1	0	1	1	28646.9	9.87	CAEEL	1			0	1	1	6560	0	Q22621	3.8	1	5.86	98	98.1
0	6560	0
1	0	0	1	1	13532.4	6.64	CAEEL	1			0	1	2	0	0	Q09506	15.3	1	5.84	99	99.1
57800	0	0
0	1	0	1	1	48565.2	10.7	CAEEL	1			0	1	1	13000	0	P34488	3	1	5.82	100	100.1
0	13000	0
0	1	0	1	1	460350	5.95	CAEEL	1			0	1	1	8050	0	G5EBH3	0.3	1	5.8	101	101.1
0	8050	0
0	0	1	1	1	40441.2	7.88	CAEEL	1			0	1	1	18900	0	Q9XXS2	2.9	1	5.79	102	102.1
0	0	18900
1	0	0	1	1	29126.7	6.24	CAEEL	1			0	1	1	106000	0	Q19812	2.8	1	5.75	103	103.1
106000	0	0
0	0	1	1	1	113205	6.2	CAEEL	1			0	1	1	7990	0	Q09600	0.8	1	5.73	104	104.1
0	0	7990
0	1	0	1	1	123571	4.61	CAEEL	1			0	1	1	16000	0	Q9N5V3	0.5	1	5.73	105	105.1
0	16000	0
0	1	0	1	1	10899.1	6.34	CAEEL	1			0	1	1	8290	0	Q9XWC0	8.5	1	5.7	106	106.1
0	8290	0
1	0	0	1	1	21386.9	9.95	CAEEL	1			0	1	1	31900	0	G4S101	6.6	1	5.66	107	107.1
31900	0	0
0	0	1	1	1	139347	6.68	CAEEL	1			0	1	1	14800	0	G5EG03	1.2	1	5.65	108	108.1
0	0	14800
0	0	1	1	1	68181.2	9.45	CAEEL	1			0	1	1	12100	0	Q17532	1.6	1	5.65	109	109.1
0	0	12100
0	1	0	1	1	14299.6	11.25	CAEEL	1			0	1	1	25800	0	G3MU77	10.4	1	5.63	110	110.1
0	25800	0
0	1	0	1	1	11770.5	6.11	CAEEL	1			0	1	1	46400	0	Q8MPX7	12.5	1	5.62	111	111.1
0	46400	0
1	0	0	1	1	77300.5	7.79	CAEEL	1			0	1	1	42500	0	Q20059	2	1	5.54	112	112.1
42500	0	0
0	0	1	1	1	38205.5	9.21	CAEEL	1			0	1	1	11900	0	O62506	3.9	1	5.5	113	113.1
0	0	11900
0	0	1	1	1	57885.6	6.45	CAEEL	1			0	1	1	69700	0	O62377	1.1	1	5.43	114	114.1
0	0	69700
0	1	0	1	1	77817.4	6	CAEEL	1			0	1	1	6740	0	O62446	2.1	1	5.38	115	115.1
0	6740	0
0	1	0	1	1	50358	5.65	CAEEL	1			0	1	1	16900	0	G1K0W2	2.7	1	5.37	116	116.1
0	16900	0
0	1	0	1	1	57854.7	6.18	CAEEL	1			0	1	1	2270	0	Q27471	2.6	1	5.36	117	117.1
0	2270	0
0	0	1	1	1	64522.3	5.76	CAEEL	1			0	1	1	46900	0	G5EGP1	2.6	1	5.33	118	118.1
0	0	46900
2	1	0	2	3	126499	6.64	CAEEL	1			0	1	3	78700	0	Q22992	0.8	1	5.31	119	119.1
49100	29600	0
0	1	0	1	1	140707	6.32	CAEEL	1			0	1	1	106000	0	G4S4A1	0.6	1	5.28	120	120.1
0	106000	0
1	0	0	1	1	35171.3	9.32	CAEEL	1			0	1	1	149000	0	O16222	4.1	1	5.26	121	121.1
149000	0	0
1	0	0	1	1	55793.7	8.76	CAEEL	1			0	1	1	149000	0	O16518	2.4	1	5.22	122	122.1
149000	0	0
1	0	0	1	1	18561.2	9.56	CAEEL	1			0	1	1	690	0	Q9N4A2	6.1	1	5.2	123	123.1
690	0	0
1	0	0	1	1	94846.8	5.9	CAEEL	1			0	1	1	14500	0	Q18286	2.4	1	5.18	124	124.1
14500	0	0
1	0	0	1	1	790266	5.78	CAEEL	1			0	1	1	262000	0	A0A061ACT3	0.1	1	5.15	125	125.1
262000	0	0
1	0	0	1	1	35214.6	5.46	CAEEL	1			0	1	1	7670	0	Q10905	2.3	1	5.14	126	126.1
7670	0	0
0	0	1	1	1	97202	5.77	CAEEL	1			0	1	1	17500	0	Q19070	2.7	1	5.13	127	127.1
0	0	17500
0	1	0	1	1	78073.3	9.8	CAEEL	1			0	1	1	22000	0	Q86S68	1.3	1	5.12	128	128.1
0	22000	0
0	0	1	1	1	29003.3	9.04	CAEEL	1			0	1	1	7310	0	Q9N5U6	3.6	1	5.12	129	129.1
0	0	7310
1	0	0	1	1	413952	5.98	CAEEL	1			0	1	1	9630	0	A5Z2S3	0.2	1	5.08	130	130.1
9630	0	0
0	0	1	1	1	9254.5	6.24	CAEEL	1			0	1	1	22700	0	A0A061AD09	10.7	1	5.07	131	131.1
0	0	22700
1	0	0	1	1	129654	6.11	CAEEL	1			0	1	1	4620	0	B7CED8	0.5	1	5.06	132	132.1
4620	0	0
1	0	0	1	1	25514.6	9.26	CAEEL	1			0	1	1	3880	0	Q94230	7.5	1	5.06	133	133.1
3880	0	0
0	0	1	1	1	28828.4	8.8	CAEEL	1			0	1	1	8560	0	O01340	8.4	1	5.05	134	134.1
0	0	8560
0	0	1	1	1	22535.6	9.02	CAEEL	1			0	1	1	22200	0	Q4PJ11	7.1	1	4.98	135	135.1
0	0	22200
0	0	1	1	1	139891	6.84	CAEEL	1			0	1	1	24800	0	H2L0I5	0.6	1	4.94	136	136.1
0	0	24800
1	0	0	1	1	116039	9.33	CAEEL	1			0	1	1	368000	0	O45813	0.7	1	4.8	137	137.1
368000	0	0
1	0	0	1	1	46858.2	9.32	CAEEL	1			0	1	1	2290	0	O61747	1.7	1	4.8	138	138.1
2290	0	0
0	1	0	1	1	71024.6	5.48	CAEEL	1			0	1	1	2460	0	Q21374	1.4	1	4.79	139	139.1
0	2460	0
0	0	1	1	1	37436.5	6.03	CAEEL	1			0	1	1	5850	0	Q93596	3	1	4.74	140	140.1
0	0	5850
1	0	0	1	1	124748	9.21	CAEEL	1			0	1	1	10100	0	P34339	1.1	1	4.73	141	141.1
10100	0	0
1	0	0	1	1	22455.3	8.83	CAEEL	1			0	1	1	1010	0	Q18311	7	1	4.7	142	142.1
1010	0	0
0	0	1	1	1	48836.4	10.06	CAEEL	1			0	1	1	11100	0	Q7YTQ3	5.5	1	4.7	143	143.1
0	0	11100
0	1	0	1	1	55261.6	5.96	CAEEL	1			0	1	1	12700	0	G5ED07	1.4	1	4.61	144	144.1
0	12700	0
0	1	0	1	1	103740	9.36	CAEEL	1			0	1	1	22600	0	G5EFD9	1.6	1	4.61	145	145.1
0	22600	0
1	0	0	1	1	17634.6	9.1	CAEEL	1			0	1	1	8270	0	C1P662	13.9	1	4.55	146	146.1
8270	0	0
1	0	0	1	1	36876.1	5.84	CAEEL	1			0	1	1	16600	0	Q9N4M7	3.4	1	4.55	147	147.1
16600	0	0
0	1	0	1	1	141252	8.57	CAEEL	1			0	1	1	65100	0	Q09591	0.7	1	4.54	148	148.1
0	65100	0
1	0	0	1	1	37131.9	9.04	CAEEL	1			0	1	1	16600	0	Q19584	3.8	1	4.53	149	149.1
16600	0	0
0	0	1	1	1	179536	6.14	CAEEL	1			0	1	1	20700	0	A0A0K3AQN0	0.8	1	4.52	150	150.1
0	0	20700
0	0	1	1	1	133344	6.24	CAEEL	1			0	1	1	33100	0	A0A2K5ATP8	1.1	1	4.51	151	151.1
0	0	33100
0	0	1	1	1	81594.8	6.04	CAEEL	1			0	1	1	15800	0	Q22145	1.5	1	4.5	152	152.1
0	0	15800
0	0	1	1	1	17429.7	6.77	CAEEL	1			0	1	1	59700	0	Q20424	6.6	1	4.49	153	153.1
0	0	59700
0	0	1	1	1	37267.8	9.47	CAEEL	1			0	1	1	18300	0	Q9N5I2	1.9	1	4.48	154	154.1
0	0	18300
0	1	0	1	1	46776.7	7.82	CAEEL	1			0	1	1	53600	0	H2L0B0	4.5	1	4.46	155	155.1
0	53600	0
0	2	0	1	2	15599.5	9.49	CAEEL	1			0	1	2	14500	0	Q9XXR5	7.6	1	4.44	156	156.1
0	14500	0
0	0	1	1	1	8753	6.56	CAEEL	1			0	1	1	2000	0	Q8WQC1	12	1	4.42	157	157.1
0	0	2000
0	0	1	1	1	33443	9.91	CAEEL	1			0	1	1	26500	0	Q21084	4.3	1	4.39	158	158.1
0	0	26500
0	0	1	1	1	64769.2	8.32	CAEEL	1			0	1	1	117000	0	Q9N4M3	1.2	1	4.39	159	159.1
0	0	117000
1	0	0	1	1	323152	7.54	CAEEL	1			0	1	1	4630	0	G5EFC7	0.3	1	4.36	160	160.1
4630	0	0
0	1	0	1	1	16740.7	8.01	CAEEL	1			0	1	1	131000	0	P91214	9	1	4.33	161	161.1
0	131000	0
1	0	0	1	1	74303.1	9.33	CAEEL	1			0	1	1	31900	0	Q9TYV5	1.2	1	4.3	162	162.1
31900	0	0
0	1	0	1	1	13747.8	9.95	CAEEL	1			0	1	1	16800	0	Q9N4Z4	4.9	1	4.27	163	163.1
0	16800	0
1	0	0	1	1	41851.8	8.95	CAEEL	1			0	1	1	1960	0	Q8IG38	3.7	1	4.25	164	164.1
1960	0	0
1	0	0	1	1	14083.6	4.68	CAEEL	1			0	1	1	1650	0	Q95YB3	8.5	1	4.2	165	165.1
1650	0	0
1	0	0	1	1	117666	4.92	CAEEL	1			0	1	1	20400	0	G5EC21	1.3	1	4.12	166	166.1
20400	0	0
0	1	0	1	1	70112.2	6.24	CAEEL	1			0	1	1	3530	0	Q9N303	2.1	1	4.07	167	167.1
0	3530	0
1	0	0	1	1	39632.2	9.2	CAEEL	1			0	1	1	2080	0	Q9GUE5	2.6	1	4.06	168	168.1
2080	0	0
0	1	0	1	1	50289	7.15	CAEEL	1			0	1	1	32700	0	Q20755	2.9	1	3.98	169	169.1
0	32700	0
0	1	0	1	1	33664.2	7.83	CAEEL	1			0	1	1	141000	0	Q22254	2.8	1	3.97	170	170.1
0	141000	0
0	0	1	1	1	19398.1	4.44	CAEEL	1			0	1	1	3650	0	Q9XX92	7.1	1	3.96	171	171.1
0	0	3650
0	0	1	1	1	10872.1	11.32	CAEEL	1			0	1	1	14400	0	Q9XWU9	10.8	1	3.92	172	172.1
0	0	14400
0	1	0	1	1	86064.3	9.27	CAEEL	1			0	1	1	2340	0	O61660	1.5	1	3.91	173	173.1
0	2340	0
1	0	0	1	1	252754	9.26	CAEEL	1			0	1	1	3870	0	H2L2A7	0.4	1	3.9	174	174.1
3870	0	0
1	0	0	1	1	78094	7.74	CAEEL	1			0	1	1	6540	0	Q86NJ9	1.4	1	3.9	175	175.1
6540	0	0
1	0	0	1	1	94337.2	8.66	CAEEL	1			0	1	1	149000	0	H2L2B2	1.4	1	3.85	176	176.1
149000	0	0
0	1	0	1	1	11362	9.55	CAEEL	1			0	1	1	1880	0	D7SFP1	7.5	1	3.83	177	177.1
0	1880	0
1	0	0	1	1	40835.4	6.14	CAEEL	1			0	1	1	16800	0	O45256	1.4	1	3.71	178	178.1
16800	0	0
0	1	0	1	1	110349	9.11	CAEEL	1			0	1	1	10900	0	Q93781	0.6	1	3.59	179	179.1
0	10900	0
0	0	1	1	1	61886.5	6.33	CAEEL	1			0	1	1	23400	0	Q9BIB7	3.4	1	3.58	180	180.1
0	0	23400
0	0	1	1	1	84573.1	9.7	CAEEL	1			0	1	1	2100	0	Q9XVH3	1.7	1	3.57	181	181.1
0	0	2100
0	0	1	1	1	22680.7	5.81	CAEEL	1			0	1	1	9630	0	Q17819	10.3	1	3.56	182	182.1
0	0	9630
0	0	1	1	1	58697.2	5.71	CAEEL	1			0	1	1	13000	0	A0A2K5ATZ7	2.3	1	3.55	183	183.1
0	0	13000
0	0	1	1	1	67933.4	9.72	CAEEL	1			0	1	1	3560	0	Q11181	2	1	3.52	184	184.1
0	0	3560
0	0	1	1	1	76548.1	5.82	CAEEL	1			0	1	1	4490	0	Q18406	1.8	1	3.52	185	185.1
0	0	4490
0	1	0	1	1	46846.3	9.38	CAEEL	1			0	1	1	15100	0	Q9GYS6	2.6	1	3.47	186	186.1
0	15100	0
0	1	0	1	1	92435.7	5.94	CAEEL	1			0	1	1	8290	0	Q8WQB3	0.9	1	3.46	187	187.1
0	8290	0
0	0	1	1	1	46516.2	5.85	CAEEL	1			0	1	1	17100	0	P21137	2.9	1	3.45	188	188.1
0	0	17100
0	0	1	1	1	35818.8	8.87	CAEEL	1			0	1	1	13200	0	Q9N2K7	3.8	1	3.43	189	189.1
0	0	13200
1	0	0	1	1	18401.9	9.99	CAEEL	1			0	1	1	7700	0	Q21525	9.9	1	3.4	190	190.1
7700	0	0
1	0	0	1	1	51544	5.69	CAEEL	1			0	1	1	2140	0	Q93703	5.1	1	3.37	191	191.1
2140	0	0
0	0	1	1	1	55901.7	5.37	CAEEL	1			0	1	1	26500	0	Q9U2Y2	2.4	1	3.35	192	192.1
0	0	26500
1	0	0	1	1	108389	6.7	CAEEL	1			0	1	1	1320	0	H2KYB6	1.5	1	3.32	193	193.1
1320	0	0
1	0	0	1	1	41137.5	8.91	CAEEL	1			0	1	1	14500	0	O02226	5.9	1	3.31	194	194.1
14500	0	0
0	0	1	1	1	109152	4.85	CAEEL	1			0	1	1	13500	0	Q9U1T9	1.9	1	3.31	195	195.1
0	0	13500
1	0	0	1	1	29157.5	10.61	CAEEL	1			0	1	1	21400	0	Q9N3X2	4.2	1	3.25	196	196.1
21400	0	0
0	0	1	1	1	36715.2	9.61	CAEEL	1			0	1	1	26200	0	A0A2C9C349	3.1	1	3.24	197	197.1
0	0	26200
0	0	1	1	1	41870.4	8.85	CAEEL	1			0	1	1	105000	0	Q09655	1.3	1	3.2	198	198.1
0	0	105000
1	0	0	1	1	25104	7.93	CAEEL	1			0	1	1	0	0	O44620	7.1	1	3.19	199	199.1
0	0	0
0	1	0	1	1	93841.1	5.65	CAEEL	1			0	1	1	8290	0	Q20374	0.9	1	3.19	200	200.1
0	8290	0
1	0	0	1	1	153306	6.54	CAEEL	1			0	1	1	1040	0	Q02331	1.1	1	3.18	201	201.1
1040	0	0
1	0	0	1	1	28161.8	5.82	CAEEL	1			0	1	1	5220	0	B6VQ70	5.7	1	3.17	202	202.1
5220	0	0
0	0	1	1	1	85687.2	8.71	CAEEL	1			0	1	1	162000	0	A0A164D3K0	1.7	1	3.12	203	203.1
0	0	162000
1	0	0	1	1	37370.5	9.23	CAEEL	1			0	1	1	3430	0	O16380	2.6	1	3.07	204	204.1
3430	0	0
0	0	1	1	1	81865.5	9.29	CAEEL	1			0	1	1	11600	0	G5EFR8	0.9	1	3.05	205	205.1
0	0	11600
0	1	0	1	1	29865.5	9.33	CAEEL	1			0	1	1	5000	0	Q23142	3.9	1	3	206	206.1
0	5000	0
0	1	0	1	1	21778.5	9.96	CAEEL	1			0	1	1	131000	0	P34565	6.6	1	2.99	207	207.1
0	131000	0
0	0	1	1	1	159720	5.76	CAEEL	1			0	1	1	33100	0	Q2AAB7	0.9	1	2.91	208	208.1
0	0	33100
1	0	0	1	1	76239.4	8.71	CAEEL	1			0	1	1	61200	0	O17388	1.9	1	2.84	209	209.1
61200	0	0
0	0	1	1	1	89536.8	6.39	CAEEL	1			0	1	1	8720	0	Q9BKX7	0.7	1	2.76	210	210.1
0	0	8720
1	0	0	1	1	28497.5	7.88	CAEEL	1			0	1	1	3330	0	A0A3P6NNX8	4	1	2.7	211	211.1
3330	0	0
0	0	1	1	1	28468.4	9.45	CAEEL	1			0	1	1	5100	0	Q93548	3.6	1	2.64	212	212.1
0	0	5100
0	1	0	1	1	37322.2	9.17	CAEEL	1			0	1	1	13600	0	O44840	3.3	1	2.57	213	213.1
0	13600	0
0	0	1	1	1	42359.9	9.55	CAEEL	1			0	1	1	23400	0	Q966B4	5.1	1	2.49	214	214.1
0	0	23400
0	0	1	1	1	44680.2	6.85	CAEEL	1			0	1	1	19200	0	Q10454	2.7	1	2.42	215	215.1
0	0	19200
1	0	0	1	1	234600	5.44	CAEEL	1			0	1	1	1800	0	A0A0K3AS47	0.6	1	2.37	216	216.1
1800	0	0
0	0	1	1	1	30976.8	5.31	CAEEL	1			0	1	1	26500	0	P91061	5.1	1	2.34	217	217.1
0	0	26500
0	0	1	1	1	23210.5	5.91	CAEEL	1			0	1	1	8210	0	A8WHT6	4.4	1	2.29	218	218.1
0	0	8210
1	0	0	1	1	39641.2	8.96	CAEEL	1			0	1	1	749	0	O45691	3.6	1	2.28	219	219.1
749	0	0
0	0	1	1	1	98752.5	6.66	CAEEL	1			0	1	1	1100	0	B6VQ94	1.5	1	2.22	220	220.1
0	0	1100
0	1	0	1	1	53284.8	6.25	CAEEL	1			0	1	1	19000	0	Q95XA8	2.6	1	2.12	221	221.1
0	19000	0
1	0	0	1	1	131395	5.76	CAEEL	1			0	1	1	3730	0	G4RXT9	0.9	1	1.99	222	222.1
3730	0	0
1	0	0	1	1	12488.3	6.06	CAEEL	1			0	1	1	34100	0	Q20096	10.5	1	1.93	223	223.1
34100	0	0
0	0	1	1	1	91522.6	9.44	CAEEL	1			0	1	1	1150	0	G5EBW2	2.4	1	1.88	224	224.1
0	0	1150
0	0	1	1	1	98575.5	5.95	CAEEL	1			0	1	1	6820	0	Q9XUY0	1.6	1	1.77	225	225.1
0	0	6820
0	1	0	1	1	43151.4	6.24	CAEEL	1			0	1	1	6920	0	Q23144	2.6	1	1.55	226	226.1
0	6920	0
1	0	0	1	1	69853.8	6.43	CAEEL	1			0	1	1	17900	0	A0A0K3ATC0	1.8	1	1.53	227	227.1
17900	0	0
1	0	0	1	1	47878	6.97	CAEEL	1			0	1	1	817	0	G5EDS9	2.4	1	1.44	228	228.1
817	0	0
