# Supplementary material for: Cronobacter sakazakii infection implicates multifaceted neuro-immune regulatory pathways of Caenorhabditis elegans
Source: Royal Society of Chemistry journal article supplement (doi:10.1039/d3mo00167a), 2023-09-28
Supplement: d3mo00167a6.xlsx [file d3mo00167a6.xlsx]

## Sheet: a) molecular function (MF)
#term ID	term description	observed gene count	background gene count	strength	false discovery rate	matching proteins in your network (IDs)	matching proteins in your network (labels)
GO:0000993	RNA polymerase II complex binding	4	18	1.15	0.0466	6239.B0035.11,6239.B0464.2c,6239.E03A3.2,6239.F36A2.1d	B0035.11,B0464.2,rcq-5,cids-2
GO:0019843	rRNA binding	5	34	0.97	0.0466	6239.B0250.1,6239.B0303.15,6239.B0336.10.3,6239.C16A3.9,6239.F54C9.5	rpl-2,mrpl-11,rpl-23,rps-13,rpl-5
GO:0003735	Structural constituent of ribosome	14	139	0.8	5.37e-05	6239.B0041.4,6239.B0250.1,6239.B0303.15,6239.B0336.10.3,6239.B0393.1.1,6239.B0412.4,6239.B0513.3a,6239.C16A3.9,6239.C32E8.2a,6239.F39B2.6.2,6239.F54C9.5,6239.K11H3.6,6239.M01F1.2.1,6239.Y71A12B.1a	rpl-4,rpl-2,mrpl-11,rpl-23,rps-0,rps-29,rpl-29,rps-13,rpl-13,rps-26,rpl-5,mrpl-36,rpl-16,rps-6
GO:0005198	Structural molecule activity	18	423	0.43	0.0411	6239.B0041.4,6239.B0250.1,6239.B0303.15,6239.B0336.10.3,6239.B0393.1.1,6239.B0412.4,6239.B0513.3a,6239.C16A3.9,6239.C32E8.2a,6239.C34D4.15a,6239.F39B2.6.2,6239.F54C9.5,6239.K11H3.6,6239.M01F1.2.1,6239.T01G9.4,6239.Y71A12B.1a,6239.Y71F9AL.17,6239.ZK863.2	rpl-4,rpl-2,mrpl-11,rpl-23,rps-0,rps-29,rpl-29,rps-13,rpl-13,col-113,rps-26,rpl-5,mrpl-36,rpl-16,npp-2,rps-6,Y71F9AL.17,col-37
GO:0005524	ATP binding	29	912	0.3	0.0467	6239.B0261.2a,6239.B0464.5a.1,6239.B0511.4,6239.B0511.6,6239.C05D10.2a,6239.C06G3.2,6239.C09D4.3,6239.C16A3.1c,6239.C28A5.6,6239.C34E10.6.1,6239.E03A3.2,6239.F09E8.3,6239.F19B6.4,6239.F22D6.3a,6239.F22E10.3,6239.F35G12.3a,6239.F35H8.7,6239.F38E11.6b,6239.F47F2.1b,6239.F56A6.2a,6239.F58G11.2a,6239.F59A6.4,6239.T04C10.1,6239.T04C12.4.1,6239.T10H9.5b,6239.T15B12.2,6239.T26A5.1,6239.Y105C5A.24,6239.Y…	let-363,spk-1,tag-344,B0511.6,C05D10.2,klp-18,C09D4.3,C16A3.1,C28A5.6,atp-2,rcq-5,msh-5,wht-5,nars-1,pgp-14,sel-5,wee-1.1,F38E11.6,F47F2.1,hum-7,F58G11.2,F59A6.4,mbk-1,act-3,pmp-5,T15B12.2,wht-6,Y105C5A.24,rad-51
GO:0043168	Anion binding	40	1390	0.26	0.0411	6239.B0261.2a,6239.B0464.5a.1,6239.B0511.4,6239.B0511.6,6239.C04G6.3,6239.C05D10.2a,6239.C06G3.2,6239.C09D4.3,6239.C16A3.1c,6239.C28A5.6,6239.C34E10.6.1,6239.E03A3.2,6239.F08A8.4.2,6239.F09E8.3,6239.F19B6.4,6239.F22D6.3a,6239.F22E10.3,6239.F31E3.5.1,6239.F35G12.3a,6239.F35H8.7,6239.F38E11.6b,6239.F45E1.7b,6239.F47F2.1b,6239.F53E10.1,6239.F56A11.5b,6239.F56A6.2a,6239.F58G11.2a,6239.F59A6.4,6239.R0…	let-363,spk-1,tag-344,B0511.6,pld-1,C05D10.2,klp-18,C09D4.3,C16A3.1,C28A5.6,atp-2,rcq-5,F08A8.4,msh-5,wht-5,nars-1,pgp-14,eef-1A.1,sel-5,wee-1.1,F38E11.6,sdpn-1,F47F2.1,F53E10.1,F56A11.5,hum-7,F58G11.2,F59A6.4,eef-1A.2,qdpr-1,mbk-1,act-3,pmp-5,T15B12.2,wht-6,unc-59,Y105C5A.24,rad-51,wah-1,ZK550.6
GO:0036094	Small molecule binding	40	1408	0.25	0.0466	6239.B0261.2a,6239.B0464.5a.1,6239.B0511.4,6239.B0511.6,6239.C05D10.2a,6239.C06G3.2,6239.C09D4.3,6239.C16A3.1c,6239.C26C6.7b,6239.C28A5.6,6239.C34E10.6.1,6239.E03A3.2,6239.F08A8.4.2,6239.F09E8.3,6239.F19B6.4,6239.F22D6.3a,6239.F22E10.3,6239.F25B5.3b,6239.F31E3.5.1,6239.F35G12.3a,6239.F35H8.7,6239.F38E11.6b,6239.F47F2.1b,6239.F53E10.1,6239.F56A11.5b,6239.F56A6.2a,6239.F58G11.2a,6239.F59A6.4,6239.R…	let-363,spk-1,tag-344,B0511.6,C05D10.2,klp-18,C09D4.3,C16A3.1,glb-8,C28A5.6,atp-2,rcq-5,F08A8.4,msh-5,wht-5,nars-1,pgp-14,F25B5.3,eef-1A.1,sel-5,wee-1.1,F38E11.6,F47F2.1,F53E10.1,F56A11.5,hum-7,F58G11.2,F59A6.4,eef-1A.2,qdpr-1,mbk-1,act-3,pmp-5,T15B12.2,wht-6,unc-59,Y105C5A.24,rad-51,wah-1,ZK550.6
GO:0016787	Hydrolase activity	45	1617	0.25	0.0411	6239.AH9.2,6239.B0511.6,6239.C04G6.3,6239.C06G3.2,6239.C08B6.8a,6239.C09D8.1j,6239.C15C8.3a,6239.C16A3.1c,6239.C16A3.2,6239.C32B5.13,6239.C34E10.6.1,6239.C47E12.4b,6239.C54G7.3a,6239.E03A3.2,6239.F07G11.9,6239.F08C6.1a.2,6239.F09E8.3,6239.F19B6.4,6239.F21D5.5,6239.F22E10.3,6239.F23H11.8a,6239.F25B5.3b,6239.F31E3.5.1,6239.F40B5.3a,6239.F41C3.5.2,6239.F42G9.1a,6239.F44B9.1a,6239.F49E8.3b,6239.F56A6…	crn-4,B0511.6,pld-1,klp-18,C08B6.8,ptp-3,C15C8.3,C16A3.1,C16A3.2,C32B5.13,atp-2,pyp-1,lgx-1,rcq-5,lmd-4,adt-2,msh-5,wht-5,F21D5.5,pgp-14,pef-1,F25B5.3,eef-1A.1,nep-15,F41C3.5,F42G9.1,dpf-6,pam-1,hum-7,F58G11.2,eef-1A.2,mig-23,pes-9,qua-1,pmp-5,nas-21,T12A2.1,toh-1,wht-6,unc-59,rad-51,usp-3,Y7A9A.1,rnh-1.1,nep-26
GO:0003676	Nucleic acid binding	55	1724	0.3	0.00023	6239.AH6.5,6239.AH9.2,6239.B0035.9,6239.B0250.1,6239.B0273.2.2,6239.B0303.15,6239.B0336.10.3,6239.B0511.10,6239.B0511.6,6239.C03B8.4,6239.C06C6.4,6239.C07H6.4,6239.C08B6.8a,6239.C14B1.10.1,6239.C15H11.6.1,6239.C16A3.1c,6239.C16A3.9,6239.C28G1.4,6239.C45E5.6b,6239.E03A3.2,6239.F09E8.3,6239.F21D5.5,6239.F22D6.3a,6239.F31E3.5.1,6239.F39B2.6.2,6239.F54C9.5,6239.F54E12.5b,6239.F54F2.9,6239.F54G2.2,623…	mex-6,crn-4,his-46,rpl-2,puf-7,mrpl-11,rpl-23,eif-3.E,B0511.6,lin-13,nhr-63,C07H6.4,C08B6.8,alkb-8,nxf-2,C16A3.1,rps-13,C28G1.4,nhr-46,rcq-5,msh-5,F21D5.5,nars-1,eef-1A.1,rps-26,rpl-5,his-57,F54F2.9,F54G2.2,nhr-60,F58G11.2,orc-2,pax-2,K09A11.1,K11D12.12,rpl-16,eef-1A.2,met-2,eif-3.D,nhr-1,nhr-104,camt-1,T08B2.5,nhr-109,ceh-54,T13F2.2,hrpf-1,efl-1,cey-4,nhr-274,nhr-92,rad-51,ZK1067.2,ZK121.2,rnh-1…
GO:0043167	Ion binding	76	2786	0.24	0.00043	6239.AH6.5,6239.B0261.2a,6239.B0412.4,6239.B0464.5a.1,6239.B0511.4,6239.B0511.6,6239.C03B8.4,6239.C04G6.3,6239.C05D10.2a,6239.C06C6.4,6239.C06G3.2,6239.C09D4.3,6239.C16A3.1c,6239.C28A5.6,6239.C34E10.6.1,6239.C34G6.2,6239.C45E5.6b,6239.C47E12.4b,6239.C50C3.2,6239.E03A3.2,6239.F08A8.4.2,6239.F08C6.1a.2,6239.F09E8.3,6239.F19B6.4,6239.F22D6.3a,6239.F22E10.3,6239.F23H11.8a,6239.F25B5.3b,6239.F31E3.5.1…	mex-6,let-363,rps-29,spk-1,tag-344,B0511.6,lin-13,pld-1,C05D10.2,nhr-63,klp-18,C09D4.3,C16A3.1,C28A5.6,atp-2,tyr-4,nhr-46,pyp-1,C50C3.2,rcq-5,F08A8.4,adt-2,msh-5,wht-5,nars-1,pgp-14,pef-1,F25B5.3,eef-1A.1,sel-5,wee-1.1,F38E11.6,F42G9.1,sdpn-1,F47F2.1,pam-1,F53E10.1,F54G2.2,F56A11.5,hum-7,nhr-60,F58G11.2,F59A6.4,K02F3.2,mup-4,spc-1,eef-1A.2,met-2,nhr-1,cdh-1,nhr-104,pes-9,qdpr-1,mbk-1,act-3,T08B2.…
GO:1901363	Heterocyclic compound binding	86	3045	0.25	2.9e-05	6239.AH6.5,6239.AH9.2,6239.B0035.9,6239.B0250.1,6239.B0261.2a,6239.B0273.2.2,6239.B0303.15,6239.B0336.10.3,6239.B0464.5a.1,6239.B0511.10,6239.B0511.4,6239.B0511.6,6239.C03B8.4,6239.C05D10.2a,6239.C06C6.4,6239.C06G3.2,6239.C07H6.4,6239.C08B6.8a,6239.C09D4.3,6239.C14B1.10.1,6239.C15H11.6.1,6239.C16A3.1c,6239.C16A3.9,6239.C26C6.7b,6239.C28A5.6,6239.C28G1.4,6239.C34E10.6.1,6239.C45E5.6b,6239.E03A3.2,…	mex-6,crn-4,his-46,rpl-2,let-363,puf-7,mrpl-11,rpl-23,spk-1,eif-3.E,tag-344,B0511.6,lin-13,C05D10.2,nhr-63,klp-18,C07H6.4,C08B6.8,C09D4.3,alkb-8,nxf-2,C16A3.1,rps-13,glb-8,C28A5.6,C28G1.4,atp-2,nhr-46,rcq-5,F08A8.4,msh-5,wht-5,F21D5.5,nars-1,pgp-14,F25B5.3,eef-1A.1,sel-5,wee-1.1,F38E11.6,rps-26,F47F2.1,F53E10.1,rpl-5,his-57,F54F2.9,F54G2.2,F56A11.5,hum-7,nhr-60,F58G11.2,F59A6.4,orc-2,pax-2,K09A11…
GO:0097159	Organic cyclic compound binding	87	3056	0.25	2.46e-05	6239.AH6.5,6239.AH9.2,6239.B0035.9,6239.B0250.1,6239.B0261.2a,6239.B0273.2.2,6239.B0303.15,6239.B0336.10.3,6239.B0464.5a.1,6239.B0511.10,6239.B0511.4,6239.B0511.6,6239.C03B8.4,6239.C05D10.2a,6239.C06C6.4,6239.C06G3.2,6239.C07H6.4,6239.C08B6.8a,6239.C09D4.3,6239.C14B1.10.1,6239.C15H11.6.1,6239.C16A3.1c,6239.C16A3.9,6239.C26C6.7b,6239.C28A5.6,6239.C28G1.4,6239.C32F10.1a.2,6239.C34E10.6.1,6239.C45E5…	mex-6,crn-4,his-46,rpl-2,let-363,puf-7,mrpl-11,rpl-23,spk-1,eif-3.E,tag-344,B0511.6,lin-13,C05D10.2,nhr-63,klp-18,C07H6.4,C08B6.8,C09D4.3,alkb-8,nxf-2,C16A3.1,rps-13,glb-8,C28A5.6,C28G1.4,obr-4,atp-2,nhr-46,rcq-5,F08A8.4,msh-5,wht-5,F21D5.5,nars-1,pgp-14,F25B5.3,eef-1A.1,sel-5,wee-1.1,F38E11.6,rps-26,F47F2.1,F53E10.1,rpl-5,his-57,F54F2.9,F54G2.2,F56A11.5,hum-7,nhr-60,F58G11.2,F59A6.4,orc-2,pax-2,…
GO:0003824	Catalytic activity	91	3986	0.16	0.0317	6239.AH9.2,6239.B0261.2a,6239.B0464.5a.1,6239.B0511.4,6239.B0511.6,6239.C04G6.3,6239.C05D10.2a,6239.C06G3.2,6239.C08B6.8a,6239.C09D4.3,6239.C09D8.1j,6239.C10H11.6a,6239.C14B1.10.1,6239.C14B9.2,6239.C15C8.3a,6239.C16A3.1c,6239.C16A3.2,6239.C24A3.4,6239.C28A5.6,6239.C32B5.13,6239.C34E10.6.1,6239.C34G6.2,6239.C38C6.2a,6239.C42D4.6,6239.C47E12.4b,6239.C50D2.9,6239.C54G7.3a,6239.E03A3.2,6239.F07G11.9,…	crn-4,let-363,spk-1,tag-344,B0511.6,pld-1,C05D10.2,klp-18,C08B6.8,C09D4.3,ptp-3,ugt-26,alkb-8,C14B9.2,C15C8.3,C16A3.1,C16A3.2,C24A3.4,C28A5.6,C32B5.13,atp-2,tyr-4,atgp-2,skr-16,pyp-1,C50D2.9,lgx-1,rcq-5,lmd-4,F08A8.4,adt-2,msh-5,wht-5,F21D5.5,nars-1,pgp-14,pef-1,F25B5.3,F25E5.2,eef-1A.1,sel-5,wee-1.1,fkb-1,F38E11.6,nep-15,F41C3.5,F42G9.1,dpf-6,F47F2.1,pam-1,F53E10.1,F56A11.5,hum-7,F58G11.2,F59A6.…
GO:0005488	Binding	137	5657	0.18	2.42e-05	6239.AH6.5,6239.AH9.2,6239.B0035.11,6239.B0035.9,6239.B0250.1,6239.B0261.2a,6239.B0273.2.2,6239.B0303.15,6239.B0336.10.3,6239.B0393.1.1,6239.B0412.4,6239.B0464.2c,6239.B0464.5a.1,6239.B0511.10,6239.B0511.4,6239.B0511.6,6239.C03B8.4,6239.C04G6.3,6239.C05D10.2a,6239.C06C6.4,6239.C06G3.2,6239.C07H6.4,6239.C08B6.8a,6239.C09D4.3,6239.C14A4.11.1,6239.C14B1.10.1,6239.C15H11.6.1,6239.C16A3.1c,6239.C16A3.…	mex-6,crn-4,B0035.11,his-46,rpl-2,let-363,puf-7,mrpl-11,rpl-23,rps-0,rps-29,B0464.2,spk-1,eif-3.E,tag-344,B0511.6,lin-13,pld-1,C05D10.2,nhr-63,klp-18,C07H6.4,C08B6.8,C09D4.3,C14A4.11,alkb-8,nxf-2,C16A3.1,rps-13,glb-8,C28A5.6,C28G1.4,obr-4,atp-2,tyr-4,pry-1,nhr-46,C45G9.7,pyp-1,nasp-2,C50C3.2,mpz-1,imb-3,rcq-5,lmd-4,F08A8.4,adt-2,msh-5,ufd-1,wht-5,F21D5.5,nars-1,pgp-14,pef-1,F25B5.3,eef-1A.1,sel-5…

## Sheet: b) cellular component (CC)
#term ID	term description	observed gene count	background gene count	strength	false discovery rate	matching proteins in your network (IDs)	matching proteins in your network (labels)
GO:0022625	Cytosolic large ribosomal subunit	7	50	0.95	0.0033	6239.B0041.4,6239.B0250.1,6239.B0336.10.3,6239.B0513.3a,6239.C32E8.2a,6239.F54C9.5,6239.M01F1.2.1	rpl-4,rpl-2,rpl-23,rpl-29,rpl-13,rpl-5,rpl-16
GO:0015934	Large ribosomal subunit	8	80	0.8	0.006	6239.B0041.4,6239.B0250.1,6239.B0303.15,6239.B0336.10.3,6239.B0513.3a,6239.C32E8.2a,6239.F54C9.5,6239.M01F1.2.1	rpl-4,rpl-2,mrpl-11,rpl-23,rpl-29,rpl-13,rpl-5,rpl-16
GO:0022626	Cytosolic ribosome	11	85	0.91	7.63e-05	6239.B0041.4,6239.B0250.1,6239.B0336.10.3,6239.B0393.1.1,6239.B0412.4,6239.B0513.3a,6239.C16A3.9,6239.C32E8.2a,6239.F39B2.6.2,6239.F54C9.5,6239.M01F1.2.1	rpl-4,rpl-2,rpl-23,rps-0,rps-29,rpl-29,rps-13,rpl-13,rps-26,rpl-5,rpl-16
GO:0044391	Ribosomal subunit	12	134	0.75	0.0005	6239.B0041.4,6239.B0250.1,6239.B0303.15,6239.B0336.10.3,6239.B0393.1.1,6239.B0412.4,6239.B0513.3a,6239.C16A3.9,6239.C32E8.2a,6239.F39B2.6.2,6239.F54C9.5,6239.M01F1.2.1	rpl-4,rpl-2,mrpl-11,rpl-23,rps-0,rps-29,rpl-29,rps-13,rpl-13,rps-26,rpl-5,rpl-16
GO:0005840	Ribosome	14	176	0.7	0.00034	6239.B0041.4,6239.B0250.1,6239.B0303.15,6239.B0336.10.3,6239.B0393.1.1,6239.B0412.4,6239.B0513.3a,6239.C16A3.9,6239.C32E8.2a,6239.F39B2.6.2,6239.F54C9.5,6239.K11H3.6,6239.M01F1.2.1,6239.Y71A12B.1a	rpl-4,rpl-2,mrpl-11,rpl-23,rps-0,rps-29,rpl-29,rps-13,rpl-13,rps-26,rpl-5,mrpl-36,rpl-16,rps-6
GO:0043232	Intracellular non-membrane-bounded organelle	42	1369	0.29	0.0044	6239.AH6.5,6239.B0035.9,6239.B0041.4,6239.B0250.1,6239.B0303.15,6239.B0336.10.3,6239.B0336.11a,6239.B0393.1.1,6239.B0412.4,6239.B0513.3a,6239.C05D10.2a,6239.C06G3.2,6239.C16A3.1c,6239.C16A3.9,6239.C27A7.4,6239.C32E8.2a,6239.C47D12.1a,6239.C48B6.8,6239.E03A3.2,6239.F35A5.1,6239.F39B2.6.2,6239.F45E1.7b,6239.F49E8.3b,6239.F54C9.5,6239.F54E12.5b,6239.F54E2.3a,6239.F56A6.2a,6239.F58G11.2a,6239.F59E10.…	mex-6,his-46,rpl-4,rpl-2,mrpl-11,rpl-23,hpo-28,rps-0,rps-29,rpl-29,C05D10.2,klp-18,C16A3.1,rps-13,che-11,rpl-13,trr-1,bbs-9,rcq-5,F35A5.1,rps-26,sdpn-1,pam-1,rpl-5,his-57,ketn-1,hum-7,F58G11.2,orc-2,hus-1,mup-4,mrpl-36,rpl-16,met-2,lpd-7,him-18,act-3,unc-59,sas-1,rad-51,rps-6,dnc-1
GO:0032991	Protein-containing complex	53	2136	0.2	0.0464	6239.B0035.11,6239.B0035.9,6239.B0041.4,6239.B0250.1,6239.B0261.2a,6239.B0303.15,6239.B0336.10.3,6239.B0393.1.1,6239.B0412.4,6239.B0464.2c,6239.B0511.10,6239.B0513.3a,6239.C06G3.2,6239.C10C5.6c,6239.C16A3.9,6239.C27A7.4,6239.C32E8.2a,6239.C34D4.15a,6239.C34E10.6.1,6239.C38C6.2a,6239.C47D12.1a,6239.C48B6.8,6239.F09E8.3,6239.F19B6.2a,6239.F23C8.6,6239.F36A2.1d,6239.F39B2.6.2,6239.F54C9.5,6239.F54E1…	B0035.11,his-46,rpl-4,rpl-2,let-363,mrpl-11,rpl-23,rps-0,rps-29,B0464.2,eif-3.E,rpl-29,klp-18,daf-15,rps-13,che-11,rpl-13,col-113,atp-2,atgp-2,trr-1,bbs-9,msh-5,ufd-1,did-2,cids-2,rps-26,rpl-5,his-57,hum-7,F58G11.2,orc-2,col-177,hus-1,snap-29,mup-4,rpl-16,eif-3.D,lpd-7,T01G1.4,npp-2,him-18,T12A2.6,T13F2.2,tag-180,unc-59,efl-1,cey-4,Y71F9AL.17,Y71H2AM.20,ZK1067.2,dnc-1,col-37
GO:0005634	Nucleus	64	2486	0.21	0.006	6239.B0035.11,6239.B0035.9,6239.B0261.2a,6239.B0454.1,6239.B0464.2c,6239.B0464.5a.1,6239.B0511.10,6239.B0511.4,6239.C03B8.4,6239.C05D10.2a,6239.C06C6.4,6239.C09D4.3,6239.C14B1.10.1,6239.C15H11.6.1,6239.C16A3.1c,6239.C16A3.9,6239.C25A1.1,6239.C28A5.6,6239.C28G1.4,6239.C37A5.9,6239.C45E5.6b,6239.C47D12.1a,6239.C50B6.2,6239.C53D5.6,6239.E03A3.2,6239.F09E8.3,6239.F19B6.2a,6239.F21D5.5,6239.F23H11.8a,…	B0035.11,his-46,let-363,lin-8,B0464.2,spk-1,eif-3.E,tag-344,lin-13,C05D10.2,nhr-63,C09D4.3,alkb-8,nxf-2,C16A3.1,rps-13,C25A1.1,C28A5.6,C28G1.4,pry-1,nhr-46,trr-1,nasp-2,imb-3,rcq-5,msh-5,ufd-1,F21D5.5,pef-1,F25H5.5,sel-5,wee-1.1,cids-2,rpl-5,his-57,F54F2.9,nhr-60,F59A6.4,orc-2,hus-1,pax-2,met-2,nhr-1,nhr-104,lpd-7,npp-2,him-18,mbk-1,camt-1,nhr-109,ceh-54,T13F2.2,T15B12.2,T28B8.4,efl-1,lst-3,nhr-2…
GO:0043231	Intracellular membrane-bounded organelle	88	3929	0.15	0.0216	6239.B0035.11,6239.B0035.9,6239.B0261.2a,6239.B0303.15,6239.B0454.1,6239.B0464.2c,6239.B0464.5a.1,6239.B0511.10,6239.B0511.4,6239.C03B8.4,6239.C04G6.3,6239.C05D10.2a,6239.C06C6.4,6239.C08B6.8a,6239.C09D4.3,6239.C10H11.6a,6239.C14B1.10.1,6239.C14B9.2,6239.C15H11.6.1,6239.C16A3.1c,6239.C16A3.9,6239.C25A1.1,6239.C28A5.6,6239.C28G1.4,6239.C32B5.13,6239.C32F10.1a.2,6239.C34E10.6.1,6239.C37A5.9,6239.C4…	B0035.11,his-46,let-363,mrpl-11,lin-8,B0464.2,spk-1,eif-3.E,tag-344,lin-13,pld-1,C05D10.2,nhr-63,C08B6.8,C09D4.3,ugt-26,alkb-8,C14B9.2,nxf-2,C16A3.1,rps-13,C25A1.1,C28A5.6,C28G1.4,C32B5.13,obr-4,atp-2,pry-1,nhr-46,trr-1,pyp-1,nasp-2,imb-3,D1046.3,rcq-5,F08A8.4,msh-5,ufd-1,F21C10.10,F21D5.5,pef-1,F25H5.5,sel-5,wee-1.1,cids-2,rps-26,rpl-5,his-57,F54F2.9,nhr-60,F59A6.4,orc-2,hus-1,K02F3.2,pax-2,met-…
GO:0005737	Cytoplasm	89	3594	0.19	0.0011	6239.AH6.5,6239.AH9.2,6239.B0035.11,6239.B0041.4,6239.B0244.8,6239.B0250.1,6239.B0261.2a,6239.B0303.15,6239.B0336.10.3,6239.B0393.1.1,6239.B0412.4,6239.B0464.5a.1,6239.B0511.10,6239.B0511.4,6239.B0513.3a,6239.C04G6.3,6239.C05D10.2a,6239.C06G3.2,6239.C08B6.8a,6239.C09D4.3,6239.C10C5.6c,6239.C14A4.11.1,6239.C14B1.10.1,6239.C14B9.2,6239.C16A3.2,6239.C16A3.9,6239.C27A7.4,6239.C28A5.6,6239.C32B5.13,62…	mex-6,crn-4,B0035.11,rpl-4,egg-1,rpl-2,let-363,mrpl-11,rpl-23,rps-0,rps-29,spk-1,eif-3.E,tag-344,rpl-29,pld-1,C05D10.2,klp-18,C08B6.8,C09D4.3,daf-15,C14A4.11,alkb-8,C14B9.2,C16A3.2,rps-13,che-11,C28A5.6,C32B5.13,rpl-13,obr-4,atp-2,pry-1,pyp-1,imb-3,D1046.3,rcq-5,F08A8.4,ufd-1,F21C10.10,nars-1,did-2,pef-1,F25B5.3,eef-1A.1,F35A5.1,sel-5,fkb-1,rps-26,sdpn-1,F47F2.1,pam-1,F53H1.3,rpl-5,ketn-1,F58G11.…
GO:0043227	Membrane-bounded organelle	94	4183	0.15	0.0126	6239.B0035.11,6239.B0035.9,6239.B0244.8,6239.B0261.2a,6239.B0303.15,6239.B0454.1,6239.B0464.2c,6239.B0464.5a.1,6239.B0511.10,6239.B0511.4,6239.C03B8.4,6239.C04G6.3,6239.C05D10.2a,6239.C06C6.4,6239.C08B6.8a,6239.C09D4.3,6239.C10H11.6a,6239.C14B1.10.1,6239.C14B9.2,6239.C15H11.6.1,6239.C16A3.1c,6239.C16A3.9,6239.C25A1.1,6239.C28A5.6,6239.C28G1.4,6239.C32B5.13,6239.C32F10.1a.2,6239.C34E10.6.1,6239.C3…	B0035.11,his-46,egg-1,let-363,mrpl-11,lin-8,B0464.2,spk-1,eif-3.E,tag-344,lin-13,pld-1,C05D10.2,nhr-63,C08B6.8,C09D4.3,ugt-26,alkb-8,C14B9.2,nxf-2,C16A3.1,rps-13,C25A1.1,C28A5.6,C28G1.4,C32B5.13,obr-4,atp-2,pry-1,nhr-46,trr-1,pyp-1,nasp-2,imb-3,D1046.3,rcq-5,F08A8.4,msh-5,ufd-1,F21C10.10,F21D5.5,did-2,pef-1,F25H5.5,sel-5,wee-1.1,cids-2,rps-26,sdpn-1,F53H1.3,rpl-5,his-57,F54F2.9,nhr-60,F59A6.4,orc…
GO:0043229	Intracellular organelle	119	4740	0.2	1.72e-05	6239.AH6.5,6239.B0035.11,6239.B0035.9,6239.B0041.4,6239.B0244.8,6239.B0250.1,6239.B0261.2a,6239.B0303.15,6239.B0336.10.3,6239.B0336.11a,6239.B0393.1.1,6239.B0412.4,6239.B0454.1,6239.B0464.2c,6239.B0464.5a.1,6239.B0511.10,6239.B0511.4,6239.B0513.3a,6239.C03B8.4,6239.C04G6.3,6239.C05D10.2a,6239.C06C6.4,6239.C06G3.2,6239.C08B6.8a,6239.C09D4.3,6239.C10H11.6a,6239.C14B1.10.1,6239.C14B9.2,6239.C15H11.6…	mex-6,B0035.11,his-46,rpl-4,egg-1,rpl-2,let-363,mrpl-11,rpl-23,hpo-28,rps-0,rps-29,lin-8,B0464.2,spk-1,eif-3.E,tag-344,rpl-29,lin-13,pld-1,C05D10.2,nhr-63,klp-18,C08B6.8,C09D4.3,ugt-26,alkb-8,C14B9.2,nxf-2,C16A3.1,rps-13,C25A1.1,che-11,C28A5.6,C28G1.4,C32B5.13,rpl-13,obr-4,atp-2,pry-1,nhr-46,trr-1,pyp-1,bbs-9,nasp-2,imb-3,D1046.3,rcq-5,F08A8.4,msh-5,ufd-1,F21C10.10,F21D5.5,did-2,pef-1,F25H5.5,F35…
GO:0005622	Intracellular	137	5660	0.18	1.42e-05	6239.AH6.5,6239.AH9.2,6239.B0035.11,6239.B0035.9,6239.B0041.4,6239.B0244.8,6239.B0250.1,6239.B0261.2a,6239.B0303.15,6239.B0336.10.3,6239.B0336.11a,6239.B0393.1.1,6239.B0412.4,6239.B0454.1,6239.B0464.2c,6239.B0464.5a.1,6239.B0511.10,6239.B0511.4,6239.B0513.3a,6239.C03B8.4,6239.C04G6.3,6239.C05D10.2a,6239.C06C6.4,6239.C06G3.2,6239.C08B6.8a,6239.C09D4.3,6239.C10C5.6c,6239.C10H11.6a,6239.C14A4.11.1,6…	mex-6,crn-4,B0035.11,his-46,rpl-4,egg-1,rpl-2,let-363,mrpl-11,rpl-23,hpo-28,rps-0,rps-29,lin-8,B0464.2,spk-1,eif-3.E,tag-344,rpl-29,lin-13,pld-1,C05D10.2,nhr-63,klp-18,C08B6.8,C09D4.3,daf-15,ugt-26,C14A4.11,alkb-8,C14B9.2,nxf-2,C16A3.1,C16A3.2,rps-13,C25A1.1,che-11,C28A5.6,C28G1.4,C32B5.13,rpl-13,obr-4,atp-2,pry-1,nhr-46,trr-1,pyp-1,bbs-9,nasp-2,imb-3,D1046.3,rcq-5,F08A8.4,msh-5,ufd-1,F21C10.10,F…
GO:0110165	Cellular anatomical entity	211	11324	0.07	0.0164	6239.AH6.5,6239.AH9.2,6239.B0035.11,6239.B0035.9,6239.B0041.4,6239.B0238.5,6239.B0244.8,6239.B0250.1,6239.B0261.2a,6239.B0303.15,6239.B0336.10.3,6239.B0336.11a,6239.B0393.1.1,6239.B0412.4,6239.B0454.1,6239.B0464.2c,6239.B0464.5a.1,6239.B0511.10,6239.B0511.12a,6239.B0511.4,6239.B0513.3a,6239.C01F6.14,6239.C03B8.4,6239.C04G6.3,6239.C05C12.3,6239.C05D10.2a,6239.C06C6.4,6239.C06G3.2,6239.C08B6.5,6239…	mex-6,crn-4,B0035.11,his-46,rpl-4,srt-67,egg-1,rpl-2,let-363,mrpl-11,rpl-23,hpo-28,rps-0,rps-29,lin-8,B0464.2,spk-1,eif-3.E,B0511.12,tag-344,rpl-29,C01F6.14,lin-13,pld-1,gtl-1,C05D10.2,nhr-63,klp-18,C08B6.5,C08B6.8,C09D4.3,ptp-3,C10A4.2,daf-15,C10G11.10,ugt-26,C12D12.3,C14A4.11,alkb-8,C14B9.2,nxf-2,C16A3.1,C16A3.2,rps-13,C25A1.1,srsx-34,che-11,C28A5.6,C28G1.4,C32B5.13,rpl-13,obr-4,col-113,atp-2,n…

## Sheet: c) biological pocess (BP)
#term ID	term description	observed gene count	background gene count	strength	false discovery rate	matching proteins in your network (IDs)	matching proteins in your network (labels)
GO:0040027	Negative regulation of vulval development	6	32	1.07	0.0047	6239.B0454.1,6239.C03B8.4,6239.C37A5.9,6239.C47D12.1a,6239.R05D3.11,6239.Y102A5C.18	lin-8,lin-13,pry-1,trr-1,met-2,efl-1
GO:0008340	Determination of adult lifespan	13	245	0.53	0.0374	6239.B0041.4,6239.B0261.2a,6239.C10C5.6c,6239.C27A7.4,6239.C34E10.6.1,6239.C52D10.12.1,6239.F08C6.1a.2,6239.F39B2.6.2,6239.H26D21.1,6239.K02G10.8b,6239.T27E9.1a.1,6239.Y54G11A.5.1,6239.Y71A12B.1a	rpl-4,let-363,daf-15,che-11,atp-2,cnnm-1,adt-2,rps-26,hus-1,dnj-14,ant-1.1,ctl-2,rps-6
GO:0006412	Translation	21	267	0.7	5.35e-06	6239.B0041.4,6239.B0250.1,6239.B0303.15,6239.B0336.10.3,6239.B0393.1.1,6239.B0412.4,6239.B0511.10,6239.B0513.3a,6239.C16A3.9,6239.C32E8.2a,6239.F22D6.3a,6239.F31E3.5.1,6239.F39B2.6.2,6239.F54C9.5,6239.K11H3.6,6239.M01F1.2.1,6239.R03G5.1a.1,6239.R08D7.3,6239.R74.7,6239.Y71A12B.1a,6239.Y7A9A.1	rpl-4,rpl-2,mrpl-11,rpl-23,rps-0,rps-29,eif-3.E,rpl-29,rps-13,rpl-13,nars-1,eef-1A.1,rps-26,rpl-5,mrpl-36,rpl-16,eef-1A.2,eif-3.D,R74.7,rps-6,Y7A9A.1
GO:0006518	Peptide metabolic process	22	319	0.64	1.25e-05	6239.B0041.4,6239.B0250.1,6239.B0303.15,6239.B0336.10.3,6239.B0393.1.1,6239.B0412.4,6239.B0511.10,6239.B0513.3a,6239.C16A3.9,6239.C32E8.2a,6239.F22D6.3a,6239.F31E3.5.1,6239.F39B2.6.2,6239.F49E8.3b,6239.F54C9.5,6239.K11H3.6,6239.M01F1.2.1,6239.R03G5.1a.1,6239.R08D7.3,6239.R74.7,6239.Y71A12B.1a,6239.Y7A9A.1	rpl-4,rpl-2,mrpl-11,rpl-23,rps-0,rps-29,eif-3.E,rpl-29,rps-13,rpl-13,nars-1,eef-1A.1,rps-26,pam-1,rpl-5,mrpl-36,rpl-16,eef-1A.2,eif-3.D,R74.7,rps-6,Y7A9A.1
GO:0043603	Cellular amide metabolic process	24	400	0.58	2.46e-05	6239.B0041.4,6239.B0250.1,6239.B0303.15,6239.B0336.10.3,6239.B0393.1.1,6239.B0412.4,6239.B0511.10,6239.B0513.3a,6239.C16A3.9,6239.C32E8.2a,6239.F22D6.3a,6239.F31E3.5.1,6239.F39B2.6.2,6239.F49E8.3b,6239.F54C9.5,6239.K11H3.6,6239.M01F1.2.1,6239.R03G5.1a.1,6239.R08D7.3,6239.R74.7,6239.T12A2.1,6239.Y57A10C.6,6239.Y71A12B.1a,6239.Y7A9A.1	rpl-4,rpl-2,mrpl-11,rpl-23,rps-0,rps-29,eif-3.E,rpl-29,rps-13,rpl-13,nars-1,eef-1A.1,rps-26,pam-1,rpl-5,mrpl-36,rpl-16,eef-1A.2,eif-3.D,R74.7,T12A2.1,daf-22,rps-6,Y7A9A.1
GO:1901566	Organonitrogen compound biosynthetic process	28	739	0.38	0.0054	6239.B0041.4,6239.B0250.1,6239.B0303.15,6239.B0336.10.3,6239.B0393.1.1,6239.B0412.4,6239.B0511.10,6239.B0513.3a,6239.C16A3.9,6239.C32E8.2a,6239.C34E10.6.1,6239.F22D6.3a,6239.F25E5.2,6239.F31E3.5.1,6239.F39B2.6.2,6239.F54C9.5,6239.K11H3.6,6239.M01F1.2.1,6239.R03G5.1a.1,6239.R08D7.3,6239.R74.7,6239.T01G1.4,6239.T03F6.1,6239.T15B7.2.2,6239.Y47D3A.23a,6239.Y71A12B.1a,6239.Y7A9A.1,6239.Y87G2A.16	rpl-4,rpl-2,mrpl-11,rpl-23,rps-0,rps-29,eif-3.E,rpl-29,rps-13,rpl-13,atp-2,nars-1,F25E5.2,eef-1A.1,rps-26,rpl-5,mrpl-36,rpl-16,eef-1A.2,eif-3.D,R74.7,T01G1.4,qdpr-1,hpo-8,gly-9,rps-6,Y7A9A.1,Y87G2A.16
GO:2000112	Regulation of cellular macromolecule biosynthetic process	35	1157	0.28	0.039	6239.AH6.5,6239.B0035.11,6239.B0261.2a,6239.B0273.2.2,6239.B0464.2c,6239.B0511.10,6239.C06C6.4,6239.C16A3.1c,6239.C45E5.6b,6239.C47D12.1a,6239.E03A3.2,6239.F22D6.3a,6239.F31E3.5.1,6239.F57A10.5,6239.F58G11.2a,6239.K06B9.5a,6239.M01F1.2.1,6239.R03G5.1a.1,6239.R05D3.11,6239.R07E4.4,6239.R08D7.3,6239.R09G11.2a.2,6239.R11E3.5a,6239.T01G9.4,6239.T05C1.4a,6239.T12C9.5c,6239.T13C5.4,6239.T13F2.2,6239.Y1…	mex-6,B0035.11,let-363,puf-7,B0464.2,eif-3.E,nhr-63,C16A3.1,nhr-46,trr-1,rcq-5,nars-1,eef-1A.1,nhr-60,F58G11.2,pax-2,rpl-16,eef-1A.2,met-2,mig-23,eif-3.D,nhr-1,nhr-104,npp-2,camt-1,nhr-109,ceh-54,T13F2.2,efl-1,lst-3,cey-4,nhr-274,nhr-92,Y67D8B.2,ZK1067.2
GO:0044271	Cellular nitrogen compound biosynthetic process	40	1187	0.33	0.0016	6239.B0035.11,6239.B0041.4,6239.B0250.1,6239.B0303.15,6239.B0336.10.3,6239.B0393.1.1,6239.B0412.4,6239.B0511.10,6239.B0513.3a,6239.C06C6.4,6239.C16A3.9,6239.C32E8.2a,6239.C34E10.6.1,6239.C45E5.6b,6239.F21D5.5,6239.F22D6.3a,6239.F31E3.5.1,6239.F39B2.6.2,6239.F54C9.5,6239.F57A10.5,6239.K06B9.5a,6239.K11H3.6,6239.M01F1.2.1,6239.R03G5.1a.1,6239.R05D3.11,6239.R07E4.4,6239.R08D7.3,6239.R09G11.2a.2,6239…	B0035.11,rpl-4,rpl-2,mrpl-11,rpl-23,rps-0,rps-29,eif-3.E,rpl-29,nhr-63,rps-13,rpl-13,atp-2,nhr-46,F21D5.5,nars-1,eef-1A.1,rps-26,rpl-5,nhr-60,pax-2,mrpl-36,rpl-16,eef-1A.2,met-2,mig-23,eif-3.D,nhr-1,nhr-104,R74.7,qdpr-1,camt-1,nhr-109,T13F2.2,efl-1,nhr-274,nhr-92,Y67D8B.2,rps-6,Y7A9A.1
GO:0007275	Multicellular organism development	43	1485	0.26	0.0211	6239.AH6.5,6239.B0041.4,6239.B0244.8,6239.B0261.2a,6239.B0273.2.2,6239.B0454.1,6239.B0464.5a.1,6239.C03B8.4,6239.C09D8.1j,6239.C10C5.6c,6239.C14A4.11.1,6239.C27A7.4,6239.C34E10.6.1,6239.C37A5.9,6239.C47D12.1a,6239.C52D10.12.1,6239.F08C6.1a.2,6239.F15B9.9,6239.F19B6.2a,6239.F35A5.1,6239.F35H8.7,6239.F39B2.6.2,6239.F49E8.3b,6239.H26D21.1,6239.K02G10.8b,6239.K06B9.5a,6239.K07D8.1,6239.K10B3.10b,6239…	mex-6,rpl-4,egg-1,let-363,puf-7,lin-8,spk-1,lin-13,ptp-3,daf-15,C14A4.11,che-11,atp-2,pry-1,trr-1,cnnm-1,adt-2,dsl-7,ufd-1,F35A5.1,wee-1.1,rps-26,pam-1,hus-1,dnj-14,pax-2,mup-4,spc-1,met-2,mig-23,npp-2,act-3,qua-1,inx-19,ant-1.1,lam-1,unc-59,efl-1,rad-51,ctl-2,daf-22,rps-6,dnc-1
GO:0034645	Cellular macromolecule biosynthetic process	44	1231	0.35	0.00017	6239.B0035.11,6239.B0041.4,6239.B0250.1,6239.B0303.15,6239.B0336.10.3,6239.B0393.1.1,6239.B0412.4,6239.B0511.10,6239.B0513.3a,6239.C06C6.4,6239.C16A3.1c,6239.C16A3.9,6239.C32E8.2a,6239.C45E5.6b,6239.E03A3.2,6239.F22D6.3a,6239.F25E5.2,6239.F31E3.5.1,6239.F39B2.6.2,6239.F54C9.5,6239.F57A10.5,6239.F59E10.1,6239.K06B9.5a,6239.K11H3.6,6239.M01F1.2.1,6239.R03G5.1a.1,6239.R05D3.11,6239.R08D7.3,6239.R09G…	B0035.11,rpl-4,rpl-2,mrpl-11,rpl-23,rps-0,rps-29,eif-3.E,rpl-29,nhr-63,C16A3.1,rps-13,rpl-13,nhr-46,rcq-5,nars-1,F25E5.2,eef-1A.1,rps-26,rpl-5,nhr-60,orc-2,pax-2,mrpl-36,rpl-16,eef-1A.2,met-2,eif-3.D,nhr-1,nhr-104,R74.7,T01G1.4,camt-1,nhr-109,T13F2.2,efl-1,nhr-274,nhr-92,rad-51,gly-9,Y67D8B.2,rps-6,Y7A9A.1,Y87G2A.16
GO:0010467	Gene expression	46	1391	0.32	0.00055	6239.AH9.2,6239.B0035.11,6239.B0041.4,6239.B0250.1,6239.B0303.15,6239.B0336.10.3,6239.B0393.1.1,6239.B0412.4,6239.B0464.5a.1,6239.B0511.10,6239.B0513.3a,6239.C06C6.4,6239.C07H6.4,6239.C14B1.10.1,6239.C15H11.6.1,6239.C16A3.9,6239.C32E8.2a,6239.C45E5.6b,6239.F22D6.3a,6239.F31E3.5.1,6239.F36A2.1d,6239.F39B2.6.2,6239.F54C9.5,6239.F57A10.5,6239.F58G11.2a,6239.K06B9.5a,6239.K11H3.6,6239.M01F1.2.1,6239.…	crn-4,B0035.11,rpl-4,rpl-2,mrpl-11,rpl-23,rps-0,rps-29,spk-1,eif-3.E,rpl-29,nhr-63,C07H6.4,alkb-8,nxf-2,rps-13,rpl-13,nhr-46,nars-1,eef-1A.1,cids-2,rps-26,rpl-5,nhr-60,F58G11.2,pax-2,mrpl-36,rpl-16,eef-1A.2,met-2,eif-3.D,nhr-1,nhr-104,lpd-7,R74.7,npp-2,camt-1,T12A2.6,nhr-109,T13F2.2,efl-1,nhr-274,nhr-92,Y67D8B.2,rps-6,Y7A9A.1
GO:0044249	Cellular biosynthetic process	53	1643	0.31	0.0002	6239.B0035.11,6239.B0041.4,6239.B0250.1,6239.B0303.15,6239.B0336.10.3,6239.B0393.1.1,6239.B0412.4,6239.B0511.10,6239.B0513.3a,6239.C04G6.3,6239.C06C6.4,6239.C16A3.1c,6239.C16A3.9,6239.C32E8.2a,6239.C34E10.6.1,6239.C45E5.6b,6239.C50D2.9,6239.E03A3.2,6239.F21D5.5,6239.F22D6.3a,6239.F25E5.2,6239.F31E3.5.1,6239.F39B2.6.2,6239.F54C9.5,6239.F57A10.5,6239.F59E10.1,6239.K06B9.5a,6239.K11H3.6,6239.M01F1.2…	B0035.11,rpl-4,rpl-2,mrpl-11,rpl-23,rps-0,rps-29,eif-3.E,rpl-29,pld-1,nhr-63,C16A3.1,rps-13,rpl-13,atp-2,nhr-46,C50D2.9,rcq-5,F21D5.5,nars-1,F25E5.2,eef-1A.1,rps-26,rpl-5,nhr-60,orc-2,pax-2,mrpl-36,rpl-16,eef-1A.2,met-2,mig-23,eif-3.D,nhr-1,nhr-104,R74.7,T01G1.4,qdpr-1,camt-1,acl-2,nhr-109,T13F2.2,hpo-8,efl-1,nhr-274,nhr-92,rad-51,gly-9,daf-22,Y67D8B.2,rps-6,Y7A9A.1,Y87G2A.16
GO:1901576	Organic substance biosynthetic process	54	1678	0.31	0.00018	6239.B0035.11,6239.B0041.4,6239.B0250.1,6239.B0303.15,6239.B0336.10.3,6239.B0393.1.1,6239.B0412.4,6239.B0511.10,6239.B0513.3a,6239.C04G6.3,6239.C06C6.4,6239.C16A3.1c,6239.C16A3.9,6239.C32E8.2a,6239.C34E10.6.1,6239.C45E5.6b,6239.C50D2.9,6239.E03A3.2,6239.F08A8.4.2,6239.F21D5.5,6239.F22D6.3a,6239.F25E5.2,6239.F31E3.5.1,6239.F39B2.6.2,6239.F54C9.5,6239.F57A10.5,6239.F59E10.1,6239.K06B9.5a,6239.K11H3…	B0035.11,rpl-4,rpl-2,mrpl-11,rpl-23,rps-0,rps-29,eif-3.E,rpl-29,pld-1,nhr-63,C16A3.1,rps-13,rpl-13,atp-2,nhr-46,C50D2.9,rcq-5,F08A8.4,F21D5.5,nars-1,F25E5.2,eef-1A.1,rps-26,rpl-5,nhr-60,orc-2,pax-2,mrpl-36,rpl-16,eef-1A.2,met-2,mig-23,eif-3.D,nhr-1,nhr-104,R74.7,T01G1.4,qdpr-1,camt-1,acl-2,nhr-109,T13F2.2,hpo-8,efl-1,nhr-274,nhr-92,rad-51,gly-9,daf-22,Y67D8B.2,rps-6,Y7A9A.1,Y87G2A.16
GO:0044267	Cellular protein metabolic process	54	1754	0.29	0.00055	6239.B0035.11,6239.B0041.4,6239.B0250.1,6239.B0261.2a,6239.B0303.15,6239.B0336.10.3,6239.B0393.1.1,6239.B0412.4,6239.B0464.2c,6239.B0464.5a.1,6239.B0511.10,6239.B0511.4,6239.B0513.3a,6239.C05D10.2a,6239.C09D4.3,6239.C09D8.1j,6239.C16A3.2,6239.C16A3.9,6239.C28A5.6,6239.C32B5.13,6239.C32E8.2a,6239.C42D4.6,6239.C47D12.1a,6239.F19B6.2a,6239.F22D6.3a,6239.F23H11.8a,6239.F31E3.5.1,6239.F35G12.3a,6239.F…	B0035.11,rpl-4,rpl-2,let-363,mrpl-11,rpl-23,rps-0,rps-29,B0464.2,spk-1,eif-3.E,tag-344,rpl-29,C05D10.2,C09D4.3,ptp-3,C16A3.2,rps-13,C28A5.6,C32B5.13,rpl-13,skr-16,trr-1,ufd-1,nars-1,pef-1,eef-1A.1,sel-5,wee-1.1,fkb-1,rps-26,F41C3.5,F42G9.1,F47F2.1,rpl-5,F59A6.4,mrpl-36,rpl-16,eef-1A.2,met-2,eif-3.D,tag-147,R74.7,T01G1.4,mbk-1,T15B12.2,T28B8.4,Y105C5A.24,gly-9,set-26,rps-6,usp-3,Y71H2AM.20,Y7A9A.1
GO:0032501	Multicellular organismal process	58	2302	0.2	0.0437	6239.AH6.5,6239.B0041.4,6239.B0244.8,6239.B0261.2a,6239.B0273.2.2,6239.B0454.1,6239.B0464.5a.1,6239.C03B8.4,6239.C05C12.3,6239.C09D8.1j,6239.C10C5.6c,6239.C14A4.11.1,6239.C27A7.4,6239.C34E10.6.1,6239.C34G6.6b,6239.C37A5.9,6239.C47D12.1a,6239.C52D10.12.1,6239.F08C6.1a.2,6239.F09C12.1,6239.F15B9.9,6239.F19B6.2a,6239.F23H11.8a,6239.F35A5.1,6239.F35H8.7,6239.F39B2.6.2,6239.F41B4.4a,6239.F49E8.3b,6239…	mex-6,rpl-4,egg-1,let-363,puf-7,lin-8,spk-1,lin-13,gtl-1,ptp-3,daf-15,C14A4.11,che-11,atp-2,noah-1,pry-1,trr-1,cnnm-1,adt-2,ggr-3,dsl-7,ufd-1,pef-1,F35A5.1,wee-1.1,rps-26,glr-6,pam-1,str-129,syd-2,hus-1,snap-29,dnj-14,pax-2,mup-4,spc-1,str-121,met-2,mig-23,mec-4,npp-2,mbk-1,act-3,qua-1,nas-21,inx-19,toh-1,ant-1.1,lam-1,unc-59,efl-1,rad-51,ctl-2,daf-22,Y57G11C.46,rps-6,dnc-1,acr-6
GO:0034641	Cellular nitrogen compound metabolic process	63	1985	0.3	3.66e-05	6239.AH9.2,6239.B0035.11,6239.B0041.4,6239.B0250.1,6239.B0303.15,6239.B0336.10.3,6239.B0393.1.1,6239.B0412.4,6239.B0464.5a.1,6239.B0511.10,6239.B0513.3a,6239.C06C6.4,6239.C07H6.4,6239.C08B6.8a,6239.C14B1.10.1,6239.C16A3.1c,6239.C16A3.9,6239.C32E8.2a,6239.C34E10.6.1,6239.C45E5.6b,6239.C47D12.1a,6239.E03A3.2,6239.F09E8.3,6239.F21D5.5,6239.F22D6.3a,6239.F25B5.3b,6239.F31E3.5.1,6239.F36A2.1d,6239.F38…	crn-4,B0035.11,rpl-4,rpl-2,mrpl-11,rpl-23,rps-0,rps-29,spk-1,eif-3.E,rpl-29,nhr-63,C07H6.4,C08B6.8,alkb-8,C16A3.1,rps-13,rpl-13,atp-2,nhr-46,trr-1,rcq-5,msh-5,F21D5.5,nars-1,F25B5.3,eef-1A.1,cids-2,F38E11.6,rps-26,pam-1,rpl-5,nhr-60,F58G11.2,hus-1,pax-2,mrpl-36,rpl-16,eef-1A.2,met-2,mig-23,eif-3.D,nhr-1,nhr-104,lpd-7,R74.7,qdpr-1,him-18,camt-1,T12A2.1,T12A2.6,nhr-109,T13F2.2,efl-1,nhr-274,nhr-92,…
GO:0019538	Protein metabolic process	66	2103	0.3	2.76e-05	6239.B0035.11,6239.B0041.4,6239.B0250.1,6239.B0261.2a,6239.B0303.15,6239.B0336.10.3,6239.B0393.1.1,6239.B0412.4,6239.B0464.2c,6239.B0464.5a.1,6239.B0511.10,6239.B0511.4,6239.B0513.3a,6239.C05D10.2a,6239.C09D4.3,6239.C09D8.1j,6239.C15C8.3a,6239.C16A3.2,6239.C16A3.9,6239.C28A5.6,6239.C32B5.13,6239.C32E8.2a,6239.C42D4.6,6239.C47D12.1a,6239.F08C6.1a.2,6239.F19B6.2a,6239.F22D6.3a,6239.F23H11.8a,6239.F…	B0035.11,rpl-4,rpl-2,let-363,mrpl-11,rpl-23,rps-0,rps-29,B0464.2,spk-1,eif-3.E,tag-344,rpl-29,C05D10.2,C09D4.3,ptp-3,C15C8.3,C16A3.2,rps-13,C28A5.6,C32B5.13,rpl-13,skr-16,trr-1,adt-2,ufd-1,nars-1,pef-1,F25E5.2,eef-1A.1,sel-5,wee-1.1,fkb-1,rps-26,nep-15,F41C3.5,F42G9.1,dpf-6,F47F2.1,pam-1,rpl-5,F59A6.4,mrpl-36,rpl-16,eef-1A.2,met-2,eif-3.D,tag-147,pes-9,R74.7,T01G1.4,mbk-1,qua-1,nas-21,T15B12.2,to…
GO:1901564	Organonitrogen compound metabolic process	73	2553	0.26	0.00014	6239.B0035.11,6239.B0041.4,6239.B0250.1,6239.B0261.2a,6239.B0303.15,6239.B0336.10.3,6239.B0393.1.1,6239.B0412.4,6239.B0464.2c,6239.B0464.5a.1,6239.B0511.10,6239.B0511.4,6239.B0513.3a,6239.C05D10.2a,6239.C09D4.3,6239.C09D8.1j,6239.C15C8.3a,6239.C16A3.2,6239.C16A3.9,6239.C28A5.6,6239.C32B5.13,6239.C32E8.2a,6239.C34E10.6.1,6239.C42D4.6,6239.C47D12.1a,6239.F08C6.1a.2,6239.F19B6.2a,6239.F22D6.3a,6239.…	B0035.11,rpl-4,rpl-2,let-363,mrpl-11,rpl-23,rps-0,rps-29,B0464.2,spk-1,eif-3.E,tag-344,rpl-29,C05D10.2,C09D4.3,ptp-3,C15C8.3,C16A3.2,rps-13,C28A5.6,C32B5.13,rpl-13,atp-2,skr-16,trr-1,adt-2,ufd-1,nars-1,pef-1,F25E5.2,eef-1A.1,sel-5,wee-1.1,fkb-1,rps-26,nep-15,F41C3.5,F42G9.1,dpf-6,F47F2.1,pam-1,rpl-5,F59A6.4,mrpl-36,rpl-16,eef-1A.2,met-2,mig-23,eif-3.D,tag-147,pes-9,R74.7,T01G1.4,qdpr-1,mbk-1,qua-…
GO:0044260	Cellular macromolecule metabolic process	81	2739	0.27	1.25e-05	6239.AH9.2,6239.B0035.11,6239.B0041.4,6239.B0250.1,6239.B0261.2a,6239.B0303.15,6239.B0336.10.3,6239.B0393.1.1,6239.B0412.4,6239.B0464.2c,6239.B0464.5a.1,6239.B0511.10,6239.B0511.4,6239.B0513.3a,6239.C05D10.2a,6239.C06C6.4,6239.C09D4.3,6239.C09D8.1j,6239.C14B1.10.1,6239.C16A3.1c,6239.C16A3.2,6239.C16A3.9,6239.C28A5.6,6239.C32B5.13,6239.C32E8.2a,6239.C42D4.6,6239.C45E5.6b,6239.C47D12.1a,6239.E03A3.…	crn-4,B0035.11,rpl-4,rpl-2,let-363,mrpl-11,rpl-23,rps-0,rps-29,B0464.2,spk-1,eif-3.E,tag-344,rpl-29,C05D10.2,nhr-63,C09D4.3,ptp-3,alkb-8,C16A3.1,C16A3.2,rps-13,C28A5.6,C32B5.13,rpl-13,skr-16,nhr-46,trr-1,rcq-5,msh-5,ufd-1,F21D5.5,nars-1,pef-1,F25E5.2,eef-1A.1,sel-5,wee-1.1,fkb-1,rps-26,F41C3.5,F42G9.1,F47F2.1,rpl-5,nhr-60,F59A6.4,orc-2,hus-1,pax-2,mrpl-36,rpl-16,eef-1A.2,met-2,eif-3.D,tag-147,nhr…
GO:0043170	Macromolecule metabolic process	99	3428	0.26	2.24e-06	6239.AH9.2,6239.B0035.11,6239.B0041.4,6239.B0250.1,6239.B0261.2a,6239.B0303.15,6239.B0336.10.3,6239.B0393.1.1,6239.B0412.4,6239.B0464.2c,6239.B0464.5a.1,6239.B0511.10,6239.B0511.4,6239.B0513.3a,6239.C05D10.2a,6239.C06C6.4,6239.C07H6.4,6239.C08B6.8a,6239.C09D4.3,6239.C09D8.1j,6239.C14B1.10.1,6239.C15C8.3a,6239.C15H11.6.1,6239.C16A3.1c,6239.C16A3.2,6239.C16A3.9,6239.C28A5.6,6239.C32B5.13,6239.C32E8…	crn-4,B0035.11,rpl-4,rpl-2,let-363,mrpl-11,rpl-23,rps-0,rps-29,B0464.2,spk-1,eif-3.E,tag-344,rpl-29,C05D10.2,nhr-63,C07H6.4,C08B6.8,C09D4.3,ptp-3,alkb-8,C15C8.3,nxf-2,C16A3.1,C16A3.2,rps-13,C28A5.6,C32B5.13,rpl-13,skr-16,nhr-46,trr-1,rcq-5,adt-2,msh-5,ufd-1,F21D5.5,nars-1,pef-1,F25E5.2,eef-1A.1,sel-5,wee-1.1,cids-2,fkb-1,rps-26,nep-15,F41C3.5,F42G9.1,dpf-6,F47F2.1,pam-1,rpl-5,nhr-60,F58G11.2,F59A…
GO:0006807	Nitrogen compound metabolic process	105	3806	0.24	3.38e-06	6239.AH9.2,6239.B0035.11,6239.B0041.4,6239.B0250.1,6239.B0261.2a,6239.B0303.15,6239.B0336.10.3,6239.B0393.1.1,6239.B0412.4,6239.B0464.2c,6239.B0464.5a.1,6239.B0511.10,6239.B0511.4,6239.B0513.3a,6239.C05D10.2a,6239.C06C6.4,6239.C07H6.4,6239.C08B6.8a,6239.C09D4.3,6239.C09D8.1j,6239.C14B1.10.1,6239.C15C8.3a,6239.C16A3.1c,6239.C16A3.2,6239.C16A3.9,6239.C28A5.6,6239.C32B5.13,6239.C32E8.2a,6239.C34E10.…	crn-4,B0035.11,rpl-4,rpl-2,let-363,mrpl-11,rpl-23,rps-0,rps-29,B0464.2,spk-1,eif-3.E,tag-344,rpl-29,C05D10.2,nhr-63,C07H6.4,C08B6.8,C09D4.3,ptp-3,alkb-8,C15C8.3,C16A3.1,C16A3.2,rps-13,C28A5.6,C32B5.13,rpl-13,atp-2,skr-16,nhr-46,trr-1,rcq-5,adt-2,msh-5,ufd-1,F21D5.5,nars-1,pef-1,F25B5.3,F25E5.2,eef-1A.1,sel-5,wee-1.1,cids-2,fkb-1,F38E11.6,rps-26,nep-15,F41C3.5,F42G9.1,dpf-6,F47F2.1,pam-1,rpl-5,nhr…
GO:0044237	Cellular metabolic process	106	4079	0.22	2.45e-05	6239.AH9.2,6239.B0035.11,6239.B0041.4,6239.B0250.1,6239.B0261.2a,6239.B0303.15,6239.B0336.10.3,6239.B0393.1.1,6239.B0412.4,6239.B0464.2c,6239.B0464.5a.1,6239.B0511.10,6239.B0511.4,6239.B0513.3a,6239.C04G6.3,6239.C05D10.2a,6239.C06C6.4,6239.C07H6.4,6239.C08B6.8a,6239.C09D4.3,6239.C09D8.1j,6239.C14B1.10.1,6239.C16A3.1c,6239.C16A3.2,6239.C16A3.9,6239.C28A5.6,6239.C32B5.13,6239.C32E8.2a,6239.C34E10.6…	crn-4,B0035.11,rpl-4,rpl-2,let-363,mrpl-11,rpl-23,rps-0,rps-29,B0464.2,spk-1,eif-3.E,tag-344,rpl-29,pld-1,C05D10.2,nhr-63,C07H6.4,C08B6.8,C09D4.3,ptp-3,alkb-8,C16A3.1,C16A3.2,rps-13,C28A5.6,C32B5.13,rpl-13,atp-2,skr-16,nhr-46,trr-1,pyp-1,C50D2.9,rcq-5,F08A8.4,msh-5,ufd-1,F21D5.5,nars-1,pef-1,F25B5.3,F25E5.2,eef-1A.1,sel-5,wee-1.1,cids-2,fkb-1,F38E11.6,rps-26,F41C3.5,F42G9.1,F47F2.1,pam-1,rpl-5,nh…
GO:0044238	Primary metabolic process	114	4147	0.24	2.24e-06	6239.AH9.2,6239.B0035.11,6239.B0041.4,6239.B0250.1,6239.B0261.2a,6239.B0303.15,6239.B0336.10.3,6239.B0393.1.1,6239.B0412.4,6239.B0464.2c,6239.B0464.5a.1,6239.B0511.10,6239.B0511.4,6239.B0513.3a,6239.C04G6.3,6239.C05D10.2a,6239.C06C6.4,6239.C07H6.4,6239.C08B6.8a,6239.C09D4.3,6239.C09D8.1j,6239.C14B1.10.1,6239.C15C8.3a,6239.C16A3.1c,6239.C16A3.2,6239.C16A3.9,6239.C28A5.6,6239.C32B5.13,6239.C32E8.2a…	crn-4,B0035.11,rpl-4,rpl-2,let-363,mrpl-11,rpl-23,rps-0,rps-29,B0464.2,spk-1,eif-3.E,tag-344,rpl-29,pld-1,C05D10.2,nhr-63,C07H6.4,C08B6.8,C09D4.3,ptp-3,alkb-8,C15C8.3,C16A3.1,C16A3.2,rps-13,C28A5.6,C32B5.13,rpl-13,atp-2,atgp-2,skr-16,nhr-46,trr-1,C50D2.9,lgx-1,rcq-5,lmd-4,F08A8.4,adt-2,msh-5,ufd-1,F21D5.5,nars-1,pef-1,F25B5.3,F25E5.2,eef-1A.1,sel-5,wee-1.1,cids-2,fkb-1,F38E11.6,rps-26,nep-15,F41C…
GO:0071704	Organic substance metabolic process	117	4339	0.23	2.24e-06	6239.AH9.2,6239.B0035.11,6239.B0041.4,6239.B0250.1,6239.B0261.2a,6239.B0303.15,6239.B0336.10.3,6239.B0393.1.1,6239.B0412.4,6239.B0464.2c,6239.B0464.5a.1,6239.B0511.10,6239.B0511.4,6239.B0513.3a,6239.C04G6.3,6239.C05D10.2a,6239.C06C6.4,6239.C07H6.4,6239.C08B6.8a,6239.C09D4.3,6239.C09D8.1j,6239.C14B1.10.1,6239.C15C8.3a,6239.C15H11.6.1,6239.C16A3.1c,6239.C16A3.2,6239.C16A3.9,6239.C28A5.6,6239.C32B5.…	crn-4,B0035.11,rpl-4,rpl-2,let-363,mrpl-11,rpl-23,rps-0,rps-29,B0464.2,spk-1,eif-3.E,tag-344,rpl-29,pld-1,C05D10.2,nhr-63,C07H6.4,C08B6.8,C09D4.3,ptp-3,alkb-8,C15C8.3,nxf-2,C16A3.1,C16A3.2,rps-13,C28A5.6,C32B5.13,rpl-13,atp-2,atgp-2,skr-16,nhr-46,trr-1,C50D2.9,lgx-1,rcq-5,lmd-4,F08A8.4,adt-2,msh-5,ufd-1,F21D5.5,nars-1,pef-1,F25B5.3,F25E5.2,eef-1A.1,sel-5,wee-1.1,cids-2,fkb-1,F38E11.6,rps-26,nep-1…
GO:0008152	Metabolic process	123	4808	0.21	5.35e-06	6239.AH9.2,6239.B0035.11,6239.B0041.4,6239.B0250.1,6239.B0261.2a,6239.B0303.15,6239.B0336.10.3,6239.B0393.1.1,6239.B0412.4,6239.B0464.2c,6239.B0464.5a.1,6239.B0511.10,6239.B0511.4,6239.B0513.3a,6239.C04G6.3,6239.C05D10.2a,6239.C06C6.4,6239.C07H6.4,6239.C08B6.8a,6239.C09D4.3,6239.C09D8.1j,6239.C14B1.10.1,6239.C15C8.3a,6239.C15H11.6.1,6239.C16A3.1c,6239.C16A3.2,6239.C16A3.9,6239.C28A5.6,6239.C32B5.…	crn-4,B0035.11,rpl-4,rpl-2,let-363,mrpl-11,rpl-23,rps-0,rps-29,B0464.2,spk-1,eif-3.E,tag-344,rpl-29,pld-1,C05D10.2,nhr-63,C07H6.4,C08B6.8,C09D4.3,ptp-3,alkb-8,C15C8.3,nxf-2,C16A3.1,C16A3.2,rps-13,C28A5.6,C32B5.13,rpl-13,atp-2,tyr-4,atgp-2,skr-16,nhr-46,trr-1,pyp-1,C50D2.9,lgx-1,rcq-5,lmd-4,F08A8.4,adt-2,msh-5,ufd-1,F21D5.5,nars-1,pef-1,F25B5.3,F25E5.2,eef-1A.1,sel-5,wee-1.1,cids-2,fkb-1,F38E11.6,…
GO:0009987	Cellular process	169	7711	0.14	3.66e-05	6239.AH9.2,6239.B0035.11,6239.B0041.4,6239.B0244.8,6239.B0250.1,6239.B0261.2a,6239.B0273.2.2,6239.B0303.15,6239.B0336.10.3,6239.B0393.1.1,6239.B0412.4,6239.B0464.2c,6239.B0464.5a.1,6239.B0511.10,6239.B0511.4,6239.B0513.3a,6239.C04G6.3,6239.C05D10.2a,6239.C06C6.4,6239.C06G3.2,6239.C07H6.4,6239.C08B6.8a,6239.C09D4.3,6239.C09D8.1j,6239.C10C5.6c,6239.C14A4.11.1,6239.C14B1.10.1,6239.C14B9.2,6239.C15H1…	crn-4,B0035.11,rpl-4,egg-1,rpl-2,let-363,puf-7,mrpl-11,rpl-23,rps-0,rps-29,B0464.2,spk-1,eif-3.E,tag-344,rpl-29,pld-1,C05D10.2,nhr-63,klp-18,C07H6.4,C08B6.8,C09D4.3,ptp-3,daf-15,C14A4.11,alkb-8,C14B9.2,nxf-2,C16A3.1,C16A3.2,rps-13,srsx-34,che-11,C28A5.6,C32B5.13,rpl-13,atp-2,pry-1,atgp-2,skr-16,nhr-46,trr-1,pyp-1,bbs-9,nasp-2,C50D2.9,imb-3,D1046.3,D2023.3,rcq-5,flp-6,F08A8.4,slo-2,adt-2,ggr-3,msh…

## Sheet: d) kegg pathway
#term ID	term description	observed gene count	matching proteins in your network (IDs)
cel04146	Peroxisome	2	acox-1.4
			pmp-5
cel01212	Fatty acid metabolism	1	acox-1.4
cel04150	mTOR signaling pathway	1	let-363
cel01040	Biosynthesis of unsaturated fatty acids	1	acox-1.4
cel01200	Carbon metabolism	1	acox-1.4
cel04012	ErbB signaling pathway	1	let-363
cel00592	alpha-Linolenic acid metabolism	1	acox-1.4
cel04140	Autophagy	1	let-363
cel04212	Longevity regulating pathway - worm	1	let-363
cel04213	Longevity regulating pathway - multiple species	1	let-363
cel04141	Protein processing in endoplasmic reticulum	1	F54F2.9
cel04361	Axon regeneration	1	let-363
cel02010	ABC transporters	1	pmp-5
cel01100	Metabolic pathways	1	acox-1.4
cel00071	Fatty acid degradation	1	acox-1.4
cel04136	Autophagy - other	1	let-363
cel00410	beta-Alanine metabolism	1	acox-1.4
cel00640	Propanoate metabolism	1	acox-1.4
UNIPROT ID	Genes	Protein name
O62139	acox-1.4	Acyl-coenzyme A oxidase
P34454	F54F2.9	Uncharacterized protein
Q95Q95	let-363	Target of rapamycin homolog
H2L034	pmp-5	ABC transmembrane type-1 domain-containing protein
