# Supplementary material for: Cronobacter sakazakii infection implicates multifaceted neuro-immune regulatory pathways of Caenorhabditis elegans
Source: Royal Society of Chemistry journal article supplement (doi:10.1039/d3mo00167a), 2023-09-28
Supplement: d3mo00167a7.xlsx [file d3mo00167a7.xlsx]

## Sheet: a) molecular function (MF)
#term ID	term description	observed gene count	background gene count	strength	false discovery rate	matching proteins in your network (IDs)	matching proteins in your network (labels)
GO:0005488	Binding	164	5657	0.22	2.89e-10	6239.AH9.2,6239.B0250.1,6239.B0303.9,6239.B0334.8,6239.B0336.10.3,6239.B0393.1.1,6239.B0412.4,6239.B0496.3e.1,6239.B0511.10,6239.B0511.6,6239.C01F6.5,6239.C04G6.3,6239.C05D10.4b,6239.C06C6.4,6239.C08B6.8a,6239.C09H6.1a,6239.C10G8.6,6239.C12C8.1,6239.C14F5.3b,6239.C16A3.1c,6239.C18D11.4a.2,6239.C18H7.4.1,6239.C25E10.2,6239.C26C6.7b,6239.C27D11.1,6239.C29F5.7,6239.C29F9.5,6239.C32A3.3a.3,6239.C34G6…	crn-4,rpl-2,vps-33.1,age-1,rpl-23,rps-0,rps-29,unc-82,eif-3.E,B0511.6,aly-1,pld-1,C05D10.4,nhr-63,C08B6.8,spr-4,ceh-34,hsp-70,tnt-3,C16A3.1,rsp-8,C18H7.4,cyp-33B1,glb-8,egl-45,glb-10,C29F9.5,rilp-1,tyr-4,mlc-1,C45G9.7,nhr-165,nhr-81,C48E7.2,mpz-1,C52E12.6,snr-4,imb-3,sup-17,EEED8.16,F01D4.8,din-1,clec-45,lmd-4,kcnl-2,F08A8.4,his-44,pkc-3,F11C1.5,crb-1,che-3,ufd-1,F21D5.5,phf-34,clec-1,gon-1,F28H6…
GO:0097159	Organic cyclic compound binding	99	3056	0.27	3.36e-07	6239.AH9.2,6239.B0250.1,6239.B0334.8,6239.B0336.10.3,6239.B0496.3e.1,6239.B0511.10,6239.B0511.6,6239.C01F6.5,6239.C06C6.4,6239.C08B6.8a,6239.C09H6.1a,6239.C10G8.6,6239.C12C8.1,6239.C16A3.1c,6239.C18D11.4a.2,6239.C18H7.4.1,6239.C25E10.2,6239.C26C6.7b,6239.C27D11.1,6239.C29F5.7,6239.C47F8.2,6239.C47F8.8,6239.C48E7.2.1,6239.C52E12.6,6239.F01D4.8,6239.F07A11.6b,6239.F08A8.4.2,6239.F08G2.1,6239.F09E5.…	crn-4,rpl-2,age-1,rpl-23,unc-82,eif-3.E,B0511.6,aly-1,nhr-63,C08B6.8,spr-4,ceh-34,hsp-70,C16A3.1,rsp-8,C18H7.4,cyp-33B1,glb-8,egl-45,glb-10,nhr-165,nhr-81,C48E7.2,C52E12.6,F01D4.8,din-1,F08A8.4,his-44,pkc-3,F11C1.5,che-3,F21D5.5,F28H6.4,tag-68,prx-6,tatn-1,patr-1,argk-1,plp-1,pkn-1,F46H5.3,F53F4.11,saeg-1,csb-1,bcs-1,F54G2.2,rskd-1,F56A11.5,gcy-33,tbg-1,pdk-1,K09A11.1,K10B3.5,K10C3.5,mlk-1,M01E5.…
GO:1901363	Heterocyclic compound binding	99	3045	0.27	3.36e-07	6239.AH9.2,6239.B0250.1,6239.B0334.8,6239.B0336.10.3,6239.B0496.3e.1,6239.B0511.10,6239.B0511.6,6239.C01F6.5,6239.C06C6.4,6239.C08B6.8a,6239.C09H6.1a,6239.C10G8.6,6239.C12C8.1,6239.C16A3.1c,6239.C18D11.4a.2,6239.C18H7.4.1,6239.C25E10.2,6239.C26C6.7b,6239.C27D11.1,6239.C29F5.7,6239.C47F8.2,6239.C47F8.8,6239.C48E7.2.1,6239.C52E12.6,6239.F01D4.8,6239.F07A11.6b,6239.F08A8.4.2,6239.F08G2.1,6239.F09E5.…	crn-4,rpl-2,age-1,rpl-23,unc-82,eif-3.E,B0511.6,aly-1,nhr-63,C08B6.8,spr-4,ceh-34,hsp-70,C16A3.1,rsp-8,C18H7.4,cyp-33B1,glb-8,egl-45,glb-10,nhr-165,nhr-81,C48E7.2,C52E12.6,F01D4.8,din-1,F08A8.4,his-44,pkc-3,F11C1.5,che-3,F21D5.5,F28H6.4,tag-68,prx-6,tatn-1,patr-1,argk-1,plp-1,pkn-1,F46H5.3,F53F4.11,saeg-1,csb-1,bcs-1,F54G2.2,rskd-1,F56A11.5,gcy-33,tbg-1,pdk-1,K09A11.1,K10B3.5,K10C3.5,mlk-1,M01E5.…
GO:0043167	Ion binding	88	2786	0.26	8.78e-06	6239.B0334.8,6239.B0412.4,6239.B0496.3e.1,6239.B0511.6,6239.C04G6.3,6239.C06C6.4,6239.C09H6.1a,6239.C12C8.1,6239.C14F5.3b,6239.C16A3.1c,6239.C18H7.4.1,6239.C25E10.2,6239.C29F9.5,6239.C34G6.2,6239.C36E6.3,6239.C47F8.2,6239.C47F8.8,6239.DY3.7,6239.EEED8.16,6239.F01D4.8,6239.F08A8.4.2,6239.F09E5.1,6239.F11C1.5d.3,6239.F11C7.4,6239.F18C12.1,6239.F21G4.4,6239.F25H8.3b,6239.F29D11.1,6239.F39G3.7,6239.F…	age-1,rps-29,unc-82,B0511.6,pld-1,nhr-63,spr-4,hsp-70,tnt-3,C16A3.1,C18H7.4,cyp-33B1,C29F9.5,tyr-4,mlc-1,nhr-165,nhr-81,sup-17,EEED8.16,F01D4.8,F08A8.4,pkc-3,F11C1.5,crb-1,che-3,phf-34,gon-1,lrp-1,prx-6,tatn-1,F43C1.1,argk-1,sdpn-1,pkn-1,F46H5.3,F49E10.2,saeg-1,csb-1,bcs-1,F54G2.2,rskd-1,F56A11.5,gcy-33,tbg-1,pdk-1,sul-1,K10C3.5,mlk-1,M01E5.2,mix-1,eef-1A.2,rfp-1,bub-1,vps-11,nhr-104,sma-1,T01D3.…
GO:0003676	Nucleic acid binding	55	1724	0.26	0.0026	6239.AH9.2,6239.B0250.1,6239.B0336.10.3,6239.B0511.10,6239.B0511.6,6239.C01F6.5,6239.C06C6.4,6239.C08B6.8a,6239.C09H6.1a,6239.C10G8.6,6239.C16A3.1c,6239.C18D11.4a.2,6239.C27D11.1,6239.C47F8.2,6239.C47F8.8,6239.C48E7.2.1,6239.C52E12.6,6239.F07A11.6b,6239.F08G2.1,6239.F21D5.5,6239.F28H6.4,6239.F37D6.6,6239.F43G6.9,6239.F45E4.2,6239.F53F4.11,6239.F53H10.2a,6239.F54G2.2,6239.K09A11.1,6239.K10B3.5,623…	crn-4,rpl-2,rpl-23,eif-3.E,B0511.6,aly-1,nhr-63,C08B6.8,spr-4,ceh-34,C16A3.1,rsp-8,egl-45,nhr-165,nhr-81,C48E7.2,C52E12.6,din-1,his-44,F21D5.5,F28H6.4,tag-68,patr-1,plp-1,F53F4.11,saeg-1,F54G2.2,K09A11.1,K10B3.5,his-24,M28.5,eef-1A.2,nhr-104,T08B2.5,nhr-109,chd-3,T20H4.2,nhr-225,hrpf-1,nol-1,Y39E4B.2,crh-1,rps-4,rad-51,snrp-200,cdt-1,madf-1,top-3,tufm-1,ZK121.2,rnh-1.1,ZK1320.7,eftu-2,ZK418.9,ZK5…
GO:0043168	Anion binding	52	1390	0.33	8.5e-05	6239.B0334.8,6239.B0496.3e.1,6239.B0511.6,6239.C04G6.3,6239.C12C8.1,6239.C16A3.1c,6239.C18H7.4.1,6239.F01D4.8,6239.F08A8.4.2,6239.F09E5.1,6239.F11C1.5d.3,6239.F18C12.1,6239.F39G3.7,6239.F42D1.2,6239.F44G3.2,6239.F45E1.7b,6239.F46F6.2b,6239.F46H5.3a.3,6239.F53H4.1,6239.F54C9.6a.2,6239.F55C5.7a,6239.F56A11.5b,6239.F57F5.2c,6239.F58A4.8,6239.H42K12.1b,6239.K10C3.5a,6239.K11D12.10a,6239.M01E5.2,6239.…	age-1,unc-82,B0511.6,pld-1,hsp-70,C16A3.1,C18H7.4,F01D4.8,F08A8.4,pkc-3,F11C1.5,che-3,prx-6,tatn-1,argk-1,sdpn-1,pkn-1,F46H5.3,csb-1,bcs-1,rskd-1,F56A11.5,gcy-33,tbg-1,pdk-1,K10C3.5,mlk-1,M01E5.2,mix-1,eef-1A.2,bub-1,sma-1,act-3,nex-2,acdh-10,chd-3,pgp-8,act-5,ppk-3,epg-6,rad-51,snrp-200,mca-3,tufm-1,ZC373.4,gro-1,eftu-2,gcy-9,lars-2,ZK550.6,ZK669.4,kin-1
GO:0036094	Small molecule binding	51	1408	0.32	0.00024	6239.B0334.8,6239.B0496.3e.1,6239.B0511.6,6239.C12C8.1,6239.C16A3.1c,6239.C18H7.4.1,6239.C26C6.7b,6239.C29F5.7,6239.F01D4.8,6239.F08A8.4.2,6239.F09E5.1,6239.F11C1.5d.3,6239.F18C12.1,6239.F39G3.7,6239.F42D1.2,6239.F44G3.2,6239.F46F6.2b,6239.F46H5.3a.3,6239.F53H4.1,6239.F54C9.6a.2,6239.F55C5.7a,6239.F56A11.5b,6239.F57F5.2c,6239.F58A4.8,6239.H42K12.1b,6239.K10C3.5a,6239.K11D12.10a,6239.M01E5.2,6239.…	age-1,unc-82,B0511.6,hsp-70,C16A3.1,C18H7.4,glb-8,glb-10,F01D4.8,F08A8.4,pkc-3,F11C1.5,che-3,prx-6,tatn-1,argk-1,pkn-1,F46H5.3,csb-1,bcs-1,rskd-1,F56A11.5,gcy-33,tbg-1,pdk-1,K10C3.5,mlk-1,M01E5.2,mix-1,eef-1A.2,bub-1,glb-24,act-3,acdh-10,gpd-1,chd-3,pgp-8,act-5,ppk-3,rad-51,snrp-200,mca-3,tufm-1,ZC373.4,gro-1,eftu-2,gcy-9,lars-2,ZK550.6,ZK669.4,kin-1
GO:0097367	Carbohydrate derivative binding	43	1206	0.31	0.0024	6239.B0334.8,6239.B0496.3e.1,6239.B0511.6,6239.C12C8.1,6239.C16A3.1c,6239.C18H7.4.1,6239.F07G11.9,6239.F09E5.1,6239.F11C1.5d.3,6239.F18C12.1,6239.F39G3.7,6239.F44G3.2,6239.F46F6.2b,6239.F46H5.3a.3,6239.F53H4.1,6239.F54C9.6a.2,6239.F55C5.7a,6239.F57F5.2c,6239.F58A4.8,6239.H42K12.1b,6239.K09C4.8,6239.K10C3.5a,6239.K11D12.10a,6239.M01E5.2,6239.M106.1,6239.R03G5.1a.1,6239.R06C7.8,6239.T04C12.4.1,6239…	age-1,unc-82,B0511.6,hsp-70,C16A3.1,C18H7.4,lmd-4,pkc-3,F11C1.5,che-3,prx-6,argk-1,pkn-1,F46H5.3,csb-1,bcs-1,rskd-1,gcy-33,tbg-1,pdk-1,sul-1,K10C3.5,mlk-1,M01E5.2,mix-1,eef-1A.2,bub-1,act-3,nex-2,chd-3,pgp-8,act-5,ppk-3,rad-51,snrp-200,mca-3,tufm-1,ZC373.4,gro-1,eftu-2,gcy-9,lars-2,kin-1
GO:0000166	Nucleotide binding	43	1274	0.29	0.0045	6239.B0334.8,6239.B0496.3e.1,6239.B0511.6,6239.C12C8.1,6239.C16A3.1c,6239.C18H7.4.1,6239.F08A8.4.2,6239.F09E5.1,6239.F11C1.5d.3,6239.F18C12.1,6239.F39G3.7,6239.F44G3.2,6239.F46F6.2b,6239.F46H5.3a.3,6239.F53H4.1,6239.F54C9.6a.2,6239.F55C5.7a,6239.F57F5.2c,6239.F58A4.8,6239.H42K12.1b,6239.K10C3.5a,6239.K11D12.10a,6239.M01E5.2,6239.M106.1,6239.R03G5.1a.1,6239.R06C7.8,6239.T04C12.4.1,6239.T08G2.3.1,6…	age-1,unc-82,B0511.6,hsp-70,C16A3.1,C18H7.4,F08A8.4,pkc-3,F11C1.5,che-3,prx-6,argk-1,pkn-1,F46H5.3,csb-1,bcs-1,rskd-1,gcy-33,tbg-1,pdk-1,K10C3.5,mlk-1,M01E5.2,mix-1,eef-1A.2,bub-1,act-3,acdh-10,gpd-1,chd-3,pgp-8,act-5,ppk-3,rad-51,snrp-200,mca-3,tufm-1,ZC373.4,gro-1,eftu-2,gcy-9,lars-2,kin-1
GO:0035639	Purine ribonucleoside triphosphate binding	40	1103	0.32	0.0026	6239.B0334.8,6239.B0496.3e.1,6239.B0511.6,6239.C12C8.1,6239.C16A3.1c,6239.C18H7.4.1,6239.F09E5.1,6239.F11C1.5d.3,6239.F18C12.1,6239.F39G3.7,6239.F44G3.2,6239.F46F6.2b,6239.F46H5.3a.3,6239.F53H4.1,6239.F54C9.6a.2,6239.F55C5.7a,6239.F57F5.2c,6239.F58A4.8,6239.H42K12.1b,6239.K10C3.5a,6239.K11D12.10a,6239.M01E5.2,6239.M106.1,6239.R03G5.1a.1,6239.R06C7.8,6239.T04C12.4.1,6239.T14G8.1,6239.T21E8.3,6239.…	age-1,unc-82,B0511.6,hsp-70,C16A3.1,C18H7.4,pkc-3,F11C1.5,che-3,prx-6,argk-1,pkn-1,F46H5.3,csb-1,bcs-1,rskd-1,gcy-33,tbg-1,pdk-1,K10C3.5,mlk-1,M01E5.2,mix-1,eef-1A.2,bub-1,act-3,chd-3,pgp-8,act-5,ppk-3,rad-51,snrp-200,mca-3,tufm-1,ZC373.4,gro-1,eftu-2,gcy-9,lars-2,kin-1
GO:0032555	Purine ribonucleotide binding	40	1126	0.31	0.0037	6239.B0334.8,6239.B0496.3e.1,6239.B0511.6,6239.C12C8.1,6239.C16A3.1c,6239.C18H7.4.1,6239.F09E5.1,6239.F11C1.5d.3,6239.F18C12.1,6239.F39G3.7,6239.F44G3.2,6239.F46F6.2b,6239.F46H5.3a.3,6239.F53H4.1,6239.F54C9.6a.2,6239.F55C5.7a,6239.F57F5.2c,6239.F58A4.8,6239.H42K12.1b,6239.K10C3.5a,6239.K11D12.10a,6239.M01E5.2,6239.M106.1,6239.R03G5.1a.1,6239.R06C7.8,6239.T04C12.4.1,6239.T14G8.1,6239.T21E8.3,6239.…	age-1,unc-82,B0511.6,hsp-70,C16A3.1,C18H7.4,pkc-3,F11C1.5,che-3,prx-6,argk-1,pkn-1,F46H5.3,csb-1,bcs-1,rskd-1,gcy-33,tbg-1,pdk-1,K10C3.5,mlk-1,M01E5.2,mix-1,eef-1A.2,bub-1,act-3,chd-3,pgp-8,act-5,ppk-3,rad-51,snrp-200,mca-3,tufm-1,ZC373.4,gro-1,eftu-2,gcy-9,lars-2,kin-1
GO:0005524	ATP binding	33	912	0.32	0.0097	6239.B0334.8,6239.B0496.3e.1,6239.B0511.6,6239.C12C8.1,6239.C16A3.1c,6239.C18H7.4.1,6239.F09E5.1,6239.F11C1.5d.3,6239.F18C12.1,6239.F39G3.7,6239.F44G3.2,6239.F46F6.2b,6239.F46H5.3a.3,6239.F53H4.1,6239.F54C9.6a.2,6239.F55C5.7a,6239.H42K12.1b,6239.K11D12.10a,6239.M106.1,6239.R06C7.8,6239.T04C12.4.1,6239.T14G8.1,6239.T21E8.3,6239.T25C8.2.1,6239.VF11C1L.1,6239.Y43C5A.6a,6239.Y46G5A.4,6239.Y67D8C.10b.…	age-1,unc-82,B0511.6,hsp-70,C16A3.1,C18H7.4,pkc-3,F11C1.5,che-3,prx-6,argk-1,pkn-1,F46H5.3,csb-1,bcs-1,rskd-1,pdk-1,mlk-1,mix-1,bub-1,act-3,chd-3,pgp-8,act-5,ppk-3,rad-51,snrp-200,mca-3,ZC373.4,gro-1,gcy-9,lars-2,kin-1

## Sheet: b) cellular component (CC)
#term ID	term description	observed gene count	background gene count	strength	false discovery rate	matching proteins in your network (IDs)	matching proteins in your network (labels)
GO:0005622	Intracellular	144	5660	0.17	0.00016	6239.AH9.2,6239.B0041.4,6239.B0250.1,6239.B0303.9,6239.B0334.8,6239.B0336.10.3,6239.B0393.1.1,6239.B0393.3,6239.B0412.4,6239.B0496.3e.1,6239.B0511.10,6239.B0513.3a,6239.C04G6.3,6239.C05D11.9,6239.C06C6.4,6239.C08B6.8a,6239.C09H6.1a,6239.C10G8.6,6239.C12C8.1,6239.C14F5.3b,6239.C16A3.1c,6239.C18D11.4a.2,6239.C18H7.4.1,6239.C25E10.2,6239.C27A7.4,6239.C27D11.1,6239.C28G1.3,6239.C29F9.5,6239.C32A3.3a.…	crn-4,rpl-4,rpl-2,vps-33.1,age-1,rpl-23,rps-0,B0393.3,rps-29,unc-82,eif-3.E,rpl-29,pld-1,C05D11.9,nhr-63,C08B6.8,spr-4,ceh-34,hsp-70,tnt-3,C16A3.1,rsp-8,C18H7.4,cyp-33B1,che-11,egl-45,sec-15,C29F9.5,rilp-1,sec-10,mlc-1,nhr-165,nhr-81,C48E7.2,snr-4,imb-3,acs-22,sup-17,E01B7.1,F01D4.8,F01G4.5,din-1,F08A8.4,his-44,pkc-3,crb-1,che-3,ufd-1,F21A3.5,F21C10.10,F21D5.5,F23B12.7,gon-1,lrp-1,F36H12.3,tag-68…
GO:0043226	Organelle	126	4903	0.17	0.0005	6239.B0041.4,6239.B0250.1,6239.B0303.9,6239.B0334.8,6239.B0336.10.3,6239.B0393.1.1,6239.B0412.4,6239.B0496.3e.1,6239.B0511.10,6239.B0513.3a,6239.C04G6.3,6239.C05D11.9,6239.C06C6.4,6239.C08B6.8a,6239.C09H6.1a,6239.C10G8.6,6239.C12C8.1,6239.C14F5.3b,6239.C16A3.1c,6239.C18D11.4a.2,6239.C25E10.2,6239.C27A7.4,6239.C29F9.5,6239.C32A3.3a.3,6239.C36E6.3,6239.C47F8.2,6239.C47F8.8,6239.C48E7.2.1,6239.C50C3…	rpl-4,rpl-2,vps-33.1,age-1,rpl-23,rps-0,rps-29,unc-82,eif-3.E,rpl-29,pld-1,C05D11.9,nhr-63,C08B6.8,spr-4,ceh-34,hsp-70,tnt-3,C16A3.1,rsp-8,cyp-33B1,che-11,C29F9.5,rilp-1,mlc-1,nhr-165,nhr-81,C48E7.2,unc-36,snr-4,imb-3,acs-22,sup-17,E01B7.1,F01G4.5,din-1,F08A8.4,his-44,pkc-3,che-3,ufd-1,F21A3.5,F21C10.10,F21D5.5,F23B12.7,gon-1,lrp-1,F36H12.3,tag-68,prx-6,patr-1,tag-153,cit-1.2,sdpn-1,plp-1,pkn-1,s…
GO:0043229	Intracellular organelle	122	4740	0.17	0.00051	6239.B0041.4,6239.B0250.1,6239.B0303.9,6239.B0336.10.3,6239.B0393.1.1,6239.B0412.4,6239.B0496.3e.1,6239.B0511.10,6239.B0513.3a,6239.C04G6.3,6239.C05D11.9,6239.C06C6.4,6239.C08B6.8a,6239.C09H6.1a,6239.C10G8.6,6239.C12C8.1,6239.C14F5.3b,6239.C16A3.1c,6239.C18D11.4a.2,6239.C25E10.2,6239.C27A7.4,6239.C29F9.5,6239.C32A3.3a.3,6239.C36E6.3,6239.C47F8.2,6239.C47F8.8,6239.C48E7.2.1,6239.C52E4.3.1,6239.C53…	rpl-4,rpl-2,vps-33.1,rpl-23,rps-0,rps-29,unc-82,eif-3.E,rpl-29,pld-1,C05D11.9,nhr-63,C08B6.8,spr-4,ceh-34,hsp-70,tnt-3,C16A3.1,rsp-8,cyp-33B1,che-11,C29F9.5,rilp-1,mlc-1,nhr-165,nhr-81,C48E7.2,snr-4,imb-3,acs-22,sup-17,E01B7.1,F01G4.5,din-1,F08A8.4,his-44,pkc-3,che-3,ufd-1,F21A3.5,F21C10.10,F21D5.5,F23B12.7,gon-1,lrp-1,F36H12.3,tag-68,prx-6,patr-1,tag-153,cit-1.2,sdpn-1,plp-1,pkn-1,saeg-1,F54B3.1…
GO:0043227	Membrane-bounded organelle	103	4183	0.15	0.0105	6239.B0303.9,6239.B0496.3e.1,6239.B0511.10,6239.C04G6.3,6239.C05D11.9,6239.C06C6.4,6239.C08B6.8a,6239.C09H6.1a,6239.C10G8.6,6239.C12C8.1,6239.C16A3.1c,6239.C18D11.4a.2,6239.C25E10.2,6239.C29F9.5,6239.C47F8.2,6239.C47F8.8,6239.C48E7.2.1,6239.C50C3.9a,6239.C52E4.3.1,6239.C53D5.6,6239.D1009.1a,6239.DY3.7,6239.E01B7.1,6239.F01G4.5,6239.F07A11.6b,6239.F08A8.4.2,6239.F08G2.1,6239.F18C12.1,6239.F19B6.2a…	vps-33.1,unc-82,eif-3.E,pld-1,C05D11.9,nhr-63,C08B6.8,spr-4,ceh-34,hsp-70,C16A3.1,rsp-8,cyp-33B1,C29F9.5,nhr-165,nhr-81,C48E7.2,unc-36,snr-4,imb-3,acs-22,sup-17,E01B7.1,F01G4.5,din-1,F08A8.4,his-44,che-3,ufd-1,F21A3.5,F21C10.10,F21D5.5,F23B12.7,gon-1,lrp-1,tag-68,prx-6,tag-153,cit-1.2,sdpn-1,plp-1,saeg-1,F54B3.1,bcs-1,sumv-2,sel-10,F55C12.5,tbg-1,pdi-3,H21P03.2,hus-1,pdk-1,sul-1,K10B3.5,mix-1,his…
GO:0005737	Cytoplasm	98	3594	0.2	0.00062	6239.AH9.2,6239.B0041.4,6239.B0250.1,6239.B0303.9,6239.B0334.8,6239.B0336.10.3,6239.B0393.1.1,6239.B0412.4,6239.B0496.3e.1,6239.B0511.10,6239.B0513.3a,6239.C04G6.3,6239.C08B6.8a,6239.C12C8.1,6239.C14F5.3b,6239.C25E10.2,6239.C27A7.4,6239.C27D11.1,6239.C28G1.3,6239.C32A3.3a.3,6239.C33H5.9,6239.C36E6.3,6239.C53D5.6,6239.D1009.1a,6239.DY3.7,6239.E01B7.1,6239.F01D4.8,6239.F01G4.5,6239.F08A8.4.2,6239.F…	crn-4,rpl-4,rpl-2,vps-33.1,age-1,rpl-23,rps-0,rps-29,unc-82,eif-3.E,rpl-29,pld-1,C08B6.8,hsp-70,tnt-3,cyp-33B1,che-11,egl-45,sec-15,rilp-1,sec-10,mlc-1,imb-3,acs-22,sup-17,E01B7.1,F01D4.8,F01G4.5,F08A8.4,pkc-3,crb-1,che-3,ufd-1,F21A3.5,F21C10.10,gon-1,lrp-1,tag-68,prx-6,patr-1,tag-153,sdpn-1,plp-1,pkn-1,F54B3.1,bcs-1,ketn-1,apm-1,sel-10,F55C12.5,gcy-33,tbg-1,syd-2,pdi-3,pdk-1,sul-1,K10C3.5,his-24…
GO:0032991	Protein-containing complex	66	2136	0.25	0.00075	6239.B0041.4,6239.B0250.1,6239.B0303.9,6239.B0334.8,6239.B0336.10.3,6239.B0393.1.1,6239.B0393.3,6239.B0412.4,6239.B0511.10,6239.B0513.3a,6239.C05D11.9,6239.C10G8.6,6239.C14F5.3b,6239.C15A11.5,6239.C18D11.4a.2,6239.C27A7.4,6239.C27D11.1,6239.C28G1.3,6239.C33H5.9,6239.C36E6.3,6239.C48E7.2.1,6239.C50C3.9a,6239.C52E4.3.1,6239.F01G4.5,6239.F08G2.1,6239.F11C7.4,6239.F18C12.1,6239.F19B6.2a,6239.F36A4.6,…	rpl-4,rpl-2,vps-33.1,age-1,rpl-23,rps-0,B0393.3,rps-29,eif-3.E,rpl-29,C05D11.9,ceh-34,tnt-3,col-7,rsp-8,che-11,egl-45,sec-15,sec-10,mlc-1,C48E7.2,unc-36,snr-4,F01G4.5,his-44,crb-1,che-3,ufd-1,col-33,tag-153,cit-1.2,F53F4.11,saeg-1,sumv-2,apm-1,tbg-1,H21P03.2,hus-1,emb-9,K10C3.5,mix-1,his-24,M28.5,vps-11,lsy-12,lpd-7,sma-1,mrps-14,him-18,aex-4,chd-3,T27A3.7,immt-2,apg-1,aap-1,Y39E4B.2,crh-1,rps-4,…
GO:0043232	Intracellular non-membrane-bounded organelle	48	1369	0.3	0.00075	6239.B0041.4,6239.B0250.1,6239.B0336.10.3,6239.B0393.1.1,6239.B0412.4,6239.B0496.3e.1,6239.B0513.3a,6239.C05D11.9,6239.C14F5.3b,6239.C16A3.1c,6239.C27A7.4,6239.C32A3.3a.3,6239.C36E6.3,6239.F08G2.1,6239.F09E5.1,6239.F18C12.1,6239.F21A3.5,6239.F36H12.3,6239.F43G6.9,6239.F44A2.1b,6239.F45E1.7b,6239.F45E4.2,6239.F46F6.2b,6239.F54E2.3a,6239.F55B12.3a,6239.F58A4.8,6239.H21P03.2.1,6239.H26D21.1,6239.M10…	rpl-4,rpl-2,rpl-23,rps-0,rps-29,unc-82,rpl-29,C05D11.9,tnt-3,C16A3.1,che-11,rilp-1,mlc-1,his-44,pkc-3,che-3,F21A3.5,F36H12.3,patr-1,tag-153,sdpn-1,plp-1,pkn-1,ketn-1,sel-10,tbg-1,H21P03.2,hus-1,mix-1,his-24,M28.5,bub-1,lsy-12,lpd-7,sma-1,mrps-14,num-1,him-18,act-3,act-5,T27A3.7,W03C9.2,nol-1,rps-4,rad-51,cdt-1,deps-1,ZK546.14
GO:1990904	Ribonucleoprotein complex	19	374	0.47	0.0061	6239.B0041.4,6239.B0250.1,6239.B0336.10.3,6239.B0393.1.1,6239.B0412.4,6239.B0513.3a,6239.C05D11.9,6239.C18D11.4a.2,6239.C27D11.1,6239.C52E4.3.1,6239.F53F4.11,6239.K10C3.5a,6239.M28.5.2,6239.R13A5.12,6239.T01E8.6,6239.Y43B11AR.4,6239.Y46G5A.4,6239.ZK328.2,6239.ZK546.14a	rpl-4,rpl-2,rpl-23,rps-0,rps-29,rpl-29,C05D11.9,rsp-8,egl-45,snr-4,F53F4.11,K10C3.5,M28.5,lpd-7,mrps-14,rps-4,snrp-200,eftu-2,ZK546.14
GO:0022626	Cytosolic ribosome	8	85	0.73	0.0183	6239.B0041.4,6239.B0250.1,6239.B0336.10.3,6239.B0393.1.1,6239.B0412.4,6239.B0513.3a,6239.Y43B11AR.4,6239.ZK546.14a	rpl-4,rpl-2,rpl-23,rps-0,rps-29,rpl-29,rps-4,ZK546.14
GO:0046540	U4/U6 x U5 tri-snRNP complex	4	19	1.08	0.0493	6239.C52E4.3.1,6239.M28.5.2,6239.Y46G5A.4,6239.ZK328.2	snr-4,M28.5,snrp-200,eftu-2

## Sheet: c) biological process (BP)
#term ID	term description	observed gene count	background gene count	strength	false discovery rate	matching proteins in your network (IDs)	matching proteins in your network (labels)
GO:0009987	Cellular process	180	7711	0.13	0.0021	6239.AH9.2,6239.B0041.4,6239.B0250.1,6239.B0303.9,6239.B0334.8,6239.B0336.10.3,6239.B0393.1.1,6239.B0393.3,6239.B0412.4,6239.B0496.3e.1,6239.B0511.10,6239.B0513.3a,6239.C04G6.3,6239.C05D11.9,6239.C06C6.4,6239.C08B6.8a,6239.C09H6.1a,6239.C10G8.6,6239.C12C8.1,6239.C14F5.3b,6239.C16A3.1c,6239.C18D11.4a.2,6239.C18H7.4.1,6239.C25E10.2,6239.C27A7.4,6239.C27D11.1,6239.C28G1.3,6239.C29F9.5,6239.C32A3.3a.…	crn-4,rpl-4,rpl-2,vps-33.1,age-1,rpl-23,rps-0,B0393.3,rps-29,unc-82,eif-3.E,rpl-29,pld-1,C05D11.9,nhr-63,C08B6.8,spr-4,ceh-34,hsp-70,tnt-3,C16A3.1,rsp-8,C18H7.4,cyp-33B1,che-11,egl-45,sec-15,C29F9.5,rilp-1,sec-10,skr-16,nhr-165,nhr-81,C48E7.2,unc-36,snr-4,imb-3,str-31,acs-22,D2045.2,sup-17,E01B7.1,F01G4.5,din-1,flp-6,kcnl-2,F08A8.4,tag-123,pkc-3,crb-1,che-3,srw-68,ufd-1,F21A3.5,F21D5.5,gon-1,lrp-…
GO:0008152	Metabolic process	121	4808	0.16	0.0039	6239.AH9.2,6239.B0041.4,6239.B0250.1,6239.B0334.8,6239.B0336.10.3,6239.B0393.1.1,6239.B0393.3,6239.B0412.4,6239.B0496.3e.1,6239.B0511.10,6239.B0513.3a,6239.C04G6.3,6239.C05D11.9,6239.C06C6.4,6239.C08B6.8a,6239.C09H6.1a,6239.C10G8.6,6239.C14C11.3,6239.C16A3.1c,6239.C18D11.4a.2,6239.C18H7.4.1,6239.C25E10.2,6239.C27D11.1,6239.C29F9.5,6239.C34G6.2,6239.C42D4.6,6239.C47F8.2,6239.C47F8.8,6239.C48E7.2.1…	crn-4,rpl-4,rpl-2,age-1,rpl-23,rps-0,B0393.3,rps-29,unc-82,eif-3.E,rpl-29,pld-1,C05D11.9,nhr-63,C08B6.8,spr-4,ceh-34,hex-2,C16A3.1,rsp-8,C18H7.4,cyp-33B1,egl-45,C29F9.5,tyr-4,skr-16,nhr-165,nhr-81,C48E7.2,snr-4,acs-22,sup-17,E01B7.1,F01G4.5,din-1,lmd-4,F08A8.4,pkc-3,ufd-1,F21A3.5,F21D5.5,gon-1,tag-68,tatn-1,F43C1.1,patr-1,cit-1.2,argk-1,pkn-1,F46H5.3,F49E10.2,F53F4.11,saeg-1,csb-1,sumv-2,rskd-1,g…
GO:0071704	Organic substance metabolic process	116	4339	0.19	0.0021	6239.AH9.2,6239.B0041.4,6239.B0250.1,6239.B0334.8,6239.B0336.10.3,6239.B0393.1.1,6239.B0393.3,6239.B0412.4,6239.B0496.3e.1,6239.B0511.10,6239.B0513.3a,6239.C04G6.3,6239.C05D11.9,6239.C06C6.4,6239.C08B6.8a,6239.C09H6.1a,6239.C10G8.6,6239.C14C11.3,6239.C16A3.1c,6239.C18D11.4a.2,6239.C18H7.4.1,6239.C25E10.2,6239.C27D11.1,6239.C29F9.5,6239.C42D4.6,6239.C47F8.2,6239.C47F8.8,6239.C48E7.2.1,6239.C52E4.3…	crn-4,rpl-4,rpl-2,age-1,rpl-23,rps-0,B0393.3,rps-29,unc-82,eif-3.E,rpl-29,pld-1,C05D11.9,nhr-63,C08B6.8,spr-4,ceh-34,hex-2,C16A3.1,rsp-8,C18H7.4,cyp-33B1,egl-45,C29F9.5,skr-16,nhr-165,nhr-81,C48E7.2,snr-4,acs-22,sup-17,E01B7.1,F01G4.5,din-1,lmd-4,F08A8.4,pkc-3,ufd-1,F21A3.5,F21D5.5,gon-1,tag-68,tatn-1,F43C1.1,patr-1,cit-1.2,pkn-1,F49E10.2,F53F4.11,saeg-1,csb-1,sumv-2,rskd-1,gcy-33,pdi-3,H21P03.2,…
GO:0044238	Primary metabolic process	112	4147	0.19	0.0021	6239.AH9.2,6239.B0041.4,6239.B0250.1,6239.B0334.8,6239.B0336.10.3,6239.B0393.1.1,6239.B0393.3,6239.B0412.4,6239.B0496.3e.1,6239.B0511.10,6239.B0513.3a,6239.C04G6.3,6239.C05D11.9,6239.C06C6.4,6239.C08B6.8a,6239.C09H6.1a,6239.C10G8.6,6239.C14C11.3,6239.C16A3.1c,6239.C18D11.4a.2,6239.C18H7.4.1,6239.C27D11.1,6239.C29F9.5,6239.C42D4.6,6239.C47F8.2,6239.C47F8.8,6239.C48E7.2.1,6239.C52E4.3.1,6239.D1009.…	crn-4,rpl-4,rpl-2,age-1,rpl-23,rps-0,B0393.3,rps-29,unc-82,eif-3.E,rpl-29,pld-1,C05D11.9,nhr-63,C08B6.8,spr-4,ceh-34,hex-2,C16A3.1,rsp-8,C18H7.4,egl-45,C29F9.5,skr-16,nhr-165,nhr-81,C48E7.2,snr-4,acs-22,sup-17,E01B7.1,F01G4.5,din-1,lmd-4,F08A8.4,pkc-3,ufd-1,F21A3.5,F21D5.5,gon-1,tag-68,tatn-1,F43C1.1,patr-1,cit-1.2,pkn-1,F49E10.2,F53F4.11,saeg-1,csb-1,sumv-2,rskd-1,gcy-33,pdi-3,H21P03.2,hus-1,pdk…
GO:0044237	Cellular metabolic process	111	4079	0.19	0.0021	6239.AH9.2,6239.B0041.4,6239.B0250.1,6239.B0334.8,6239.B0336.10.3,6239.B0393.1.1,6239.B0393.3,6239.B0412.4,6239.B0496.3e.1,6239.B0511.10,6239.B0513.3a,6239.C04G6.3,6239.C05D11.9,6239.C06C6.4,6239.C08B6.8a,6239.C09H6.1a,6239.C10G8.6,6239.C16A3.1c,6239.C18D11.4a.2,6239.C18H7.4.1,6239.C25E10.2,6239.C27D11.1,6239.C29F9.5,6239.C42D4.6,6239.C47F8.2,6239.C47F8.8,6239.C48E7.2.1,6239.C52E4.3.1,6239.D1009.…	crn-4,rpl-4,rpl-2,age-1,rpl-23,rps-0,B0393.3,rps-29,unc-82,eif-3.E,rpl-29,pld-1,C05D11.9,nhr-63,C08B6.8,spr-4,ceh-34,C16A3.1,rsp-8,C18H7.4,cyp-33B1,egl-45,C29F9.5,skr-16,nhr-165,nhr-81,C48E7.2,snr-4,acs-22,E01B7.1,F01G4.5,din-1,F08A8.4,pkc-3,ufd-1,F21A3.5,F21D5.5,tag-68,tatn-1,F43C1.1,patr-1,cit-1.2,argk-1,pkn-1,F46H5.3,F49E10.2,F53F4.11,saeg-1,csb-1,sumv-2,rskd-1,gcy-33,pdi-3,H21P03.2,hus-1,pdk-…
GO:0006807	Nitrogen compound metabolic process	99	3806	0.17	0.0101	6239.AH9.2,6239.B0041.4,6239.B0250.1,6239.B0334.8,6239.B0336.10.3,6239.B0393.1.1,6239.B0393.3,6239.B0412.4,6239.B0496.3e.1,6239.B0511.10,6239.B0513.3a,6239.C05D11.9,6239.C06C6.4,6239.C08B6.8a,6239.C09H6.1a,6239.C10G8.6,6239.C16A3.1c,6239.C18D11.4a.2,6239.C18H7.4.1,6239.C27D11.1,6239.C29F9.5,6239.C42D4.6,6239.C47F8.2,6239.C47F8.8,6239.C48E7.2.1,6239.C52E4.3.1,6239.DY3.7,6239.E01B7.1,6239.F01G4.5,6…	crn-4,rpl-4,rpl-2,age-1,rpl-23,rps-0,B0393.3,rps-29,unc-82,eif-3.E,rpl-29,C05D11.9,nhr-63,C08B6.8,spr-4,ceh-34,C16A3.1,rsp-8,C18H7.4,egl-45,C29F9.5,skr-16,nhr-165,nhr-81,C48E7.2,snr-4,sup-17,E01B7.1,F01G4.5,din-1,pkc-3,ufd-1,F21A3.5,F21D5.5,gon-1,tag-68,tatn-1,F43C1.1,patr-1,cit-1.2,pkn-1,F53F4.11,saeg-1,csb-1,sumv-2,rskd-1,gcy-33,pdi-3,H21P03.2,hus-1,pdk-1,sul-1,mlk-1,M28.5,eef-1A.2,rfp-1,bub-1,…
GO:0043170	Macromolecule metabolic process	95	3428	0.2	0.0021	6239.AH9.2,6239.B0041.4,6239.B0250.1,6239.B0334.8,6239.B0336.10.3,6239.B0393.1.1,6239.B0393.3,6239.B0412.4,6239.B0496.3e.1,6239.B0511.10,6239.B0513.3a,6239.C05D11.9,6239.C06C6.4,6239.C08B6.8a,6239.C09H6.1a,6239.C10G8.6,6239.C16A3.1c,6239.C18D11.4a.2,6239.C18H7.4.1,6239.C27D11.1,6239.C29F9.5,6239.C42D4.6,6239.C47F8.2,6239.C47F8.8,6239.C48E7.2.1,6239.C52E4.3.1,6239.DY3.7,6239.E01B7.1,6239.F01G4.5,6…	crn-4,rpl-4,rpl-2,age-1,rpl-23,rps-0,B0393.3,rps-29,unc-82,eif-3.E,rpl-29,C05D11.9,nhr-63,C08B6.8,spr-4,ceh-34,C16A3.1,rsp-8,C18H7.4,egl-45,C29F9.5,skr-16,nhr-165,nhr-81,C48E7.2,snr-4,sup-17,E01B7.1,F01G4.5,din-1,pkc-3,ufd-1,F21A3.5,F21D5.5,gon-1,tag-68,F43C1.1,patr-1,cit-1.2,pkn-1,F53F4.11,saeg-1,csb-1,sumv-2,rskd-1,pdi-3,H21P03.2,hus-1,pdk-1,sul-1,mlk-1,M28.5,eef-1A.2,rfp-1,bub-1,lsy-12,nhr-104…
GO:0044260	Cellular macromolecule metabolic process	81	2739	0.23	0.0021	6239.AH9.2,6239.B0041.4,6239.B0250.1,6239.B0334.8,6239.B0336.10.3,6239.B0393.1.1,6239.B0393.3,6239.B0412.4,6239.B0496.3e.1,6239.B0511.10,6239.B0513.3a,6239.C06C6.4,6239.C09H6.1a,6239.C10G8.6,6239.C16A3.1c,6239.C18H7.4.1,6239.C27D11.1,6239.C29F9.5,6239.C42D4.6,6239.C47F8.2,6239.C47F8.8,6239.C48E7.2.1,6239.E01B7.1,6239.F01G4.5,6239.F07A11.6b,6239.F09E5.1,6239.F19B6.2a,6239.F21A3.5,6239.F21D5.5,6239…	crn-4,rpl-4,rpl-2,age-1,rpl-23,rps-0,B0393.3,rps-29,unc-82,eif-3.E,rpl-29,nhr-63,spr-4,ceh-34,C16A3.1,C18H7.4,egl-45,C29F9.5,skr-16,nhr-165,nhr-81,C48E7.2,E01B7.1,F01G4.5,din-1,pkc-3,ufd-1,F21A3.5,F21D5.5,tag-68,F43C1.1,patr-1,cit-1.2,pkn-1,saeg-1,csb-1,sumv-2,rskd-1,pdi-3,H21P03.2,hus-1,pdk-1,sul-1,mlk-1,eef-1A.2,rfp-1,bub-1,lsy-12,nhr-104,mrps-14,him-18,nhr-109,T13H5.1,prl-1,bus-8,T27A3.7,nhr-2…
GO:0034641	Cellular nitrogen compound metabolic process	59	1985	0.23	0.0228	6239.AH9.2,6239.B0041.4,6239.B0250.1,6239.B0336.10.3,6239.B0393.1.1,6239.B0412.4,6239.B0511.10,6239.B0513.3a,6239.C05D11.9,6239.C06C6.4,6239.C08B6.8a,6239.C09H6.1a,6239.C10G8.6,6239.C16A3.1c,6239.C18D11.4a.2,6239.C27D11.1,6239.C47F8.2,6239.C47F8.8,6239.C48E7.2.1,6239.C52E4.3.1,6239.F07A11.6b,6239.F21A3.5,6239.F21D5.5,6239.F37D6.6,6239.F43G6.9,6239.F44B9.3a,6239.F53F4.11,6239.F53H10.2a,6239.F53H4.…	crn-4,rpl-4,rpl-2,rpl-23,rps-0,rps-29,eif-3.E,rpl-29,C05D11.9,nhr-63,C08B6.8,spr-4,ceh-34,C16A3.1,rsp-8,egl-45,nhr-165,nhr-81,C48E7.2,snr-4,din-1,F21A3.5,F21D5.5,tag-68,patr-1,cit-1.2,F53F4.11,saeg-1,csb-1,gcy-33,H21P03.2,hus-1,M28.5,eef-1A.2,nhr-104,lpd-7,mrps-14,him-18,gpd-1,nhr-109,T27A3.7,nhr-225,T27F6.6,nol-1,crtc-1,Y39E4B.2,rps-4,rad-51,snrp-200,ubc-13,madf-1,top-3,tufm-1,Y92H12A.5,gro-1,rn…
GO:0071840	Cellular component organization or biogenesis	52	1729	0.24	0.0333	6239.AH9.2,6239.B0393.1.1,6239.B0496.3e.1,6239.C14F5.3b,6239.C16A3.1c,6239.C27A7.4,6239.C27D11.1,6239.C29F9.5,6239.C32A3.3a.3,6239.C52E4.3.1,6239.D2045.2,6239.F18C12.1,6239.F39G3.7,6239.F43G6.9,6239.F45E1.7b,6239.F53F4.11,6239.F54C9.6a.2,6239.F54D11.2.1,6239.F55B12.3a,6239.F58A4.8,6239.F59F5.6,6239.H26D21.1,6239.K04H4.1a,6239.K10C3.5a,6239.K11D12.10a,6239.M106.1,6239.M163.3,6239.M28.5.2,6239.R05D…	crn-4,rps-0,unc-82,tnt-3,C16A3.1,che-11,egl-45,C29F9.5,rilp-1,snr-4,D2045.2,che-3,prx-6,patr-1,sdpn-1,F53F4.11,bcs-1,sumv-2,sel-10,tbg-1,syd-2,hus-1,emb-9,K10C3.5,mlk-1,mix-1,his-24,M28.5,rfp-1,bub-1,vps-11,lsy-12,lpd-7,sma-1,him-18,act-3,aex-4,chd-3,act-5,ant-1.1,immt-2,nol-1,crtc-1,epg-6,Y40C5A.1,rad-51,snrp-200,ddl-2,set-26,cdt-1,top-3,ZK546.14
GO:0090304	Nucleic acid metabolic process	44	1391	0.26	0.0361	6239.AH9.2,6239.B0393.1.1,6239.C05D11.9,6239.C06C6.4,6239.C08B6.8a,6239.C09H6.1a,6239.C10G8.6,6239.C16A3.1c,6239.C18D11.4a.2,6239.C47F8.2,6239.C47F8.8,6239.C48E7.2.1,6239.C52E4.3.1,6239.F07A11.6b,6239.F21A3.5,6239.F21D5.5,6239.F37D6.6,6239.F43G6.9,6239.F44B9.3a,6239.F53F4.11,6239.F53H10.2a,6239.F53H4.1,6239.H21P03.2.1,6239.H26D21.1,6239.M28.5.2,6239.R11E3.5a,6239.R13A5.12,6239.T04A8.15,6239.T12C9…	crn-4,rps-0,C05D11.9,nhr-63,C08B6.8,spr-4,ceh-34,C16A3.1,rsp-8,nhr-165,nhr-81,C48E7.2,snr-4,din-1,F21A3.5,F21D5.5,tag-68,patr-1,cit-1.2,F53F4.11,saeg-1,csb-1,H21P03.2,hus-1,M28.5,nhr-104,lpd-7,him-18,nhr-109,T27A3.7,nhr-225,nol-1,crtc-1,Y39E4B.2,rad-51,snrp-200,ubc-13,madf-1,top-3,Y92H12A.5,gro-1,rnh-1.1,eftu-2,lars-2
GO:0006996	Organelle organization	37	1109	0.28	0.0447	6239.B0393.1.1,6239.B0496.3e.1,6239.C14F5.3b,6239.C16A3.1c,6239.C27A7.4,6239.C29F9.5,6239.C32A3.3a.3,6239.F18C12.1,6239.F39G3.7,6239.F43G6.9,6239.F45E1.7b,6239.F54C9.6a.2,6239.F54D11.2.1,6239.F55B12.3a,6239.F58A4.8,6239.H26D21.1,6239.K10C3.5a,6239.M106.1,6239.M163.3,6239.R05D3.4b,6239.R06C7.8,6239.R06F6.2,6239.R07B5.9h,6239.R31.1a,6239.T04A8.15,6239.T04C12.4.1,6239.T14G12.2,6239.T14G8.1,6239.T27E…	rps-0,unc-82,tnt-3,C16A3.1,che-11,C29F9.5,rilp-1,che-3,prx-6,patr-1,sdpn-1,bcs-1,sumv-2,sel-10,tbg-1,hus-1,K10C3.5,mix-1,his-24,rfp-1,bub-1,vps-11,lsy-12,sma-1,him-18,act-3,aex-4,chd-3,ant-1.1,immt-2,epg-6,Y40C5A.1,rad-51,ddl-2,set-26,cdt-1,top-3
GO:0044085	Cellular component biogenesis	29	743	0.35	0.0247	6239.AH9.2,6239.B0393.1.1,6239.B0496.3e.1,6239.C14F5.3b,6239.C27A7.4,6239.C27D11.1,6239.C32A3.3a.3,6239.C52E4.3.1,6239.D2045.2,6239.F18C12.1,6239.F43G6.9,6239.F53F4.11,6239.F54C9.6a.2,6239.F55B12.3a,6239.F58A4.8,6239.K10C3.5a,6239.M163.3,6239.M28.5.2,6239.R06C7.8,6239.R13A5.12,6239.T14G12.2,6239.T25C8.2.1,6239.W07E6.1,6239.Y20F4.2,6239.Y39A1A.1b,6239.Y43C5A.6a,6239.Y46G5A.4,6239.Y54E10A.15,6239.Z…	crn-4,rps-0,unc-82,tnt-3,che-11,egl-45,rilp-1,snr-4,D2045.2,che-3,patr-1,F53F4.11,bcs-1,sel-10,tbg-1,K10C3.5,his-24,M28.5,bub-1,lpd-7,aex-4,act-5,nol-1,crtc-1,epg-6,rad-51,snrp-200,cdt-1,ZK546.14
GO:0051239	Regulation of multicellular organismal process	23	539	0.39	0.0356	6239.B0334.8,6239.C14F5.3b,6239.C36E6.3,6239.DY3.7,6239.F08A10.1g,6239.F18C12.1,6239.F25H8.3b,6239.F29D11.1,6239.F55B12.3a,6239.F58A4.8,6239.F59F5.6,6239.H06O01.1.1,6239.H42K12.1b,6239.K04H4.1a,6239.K08D9.3,6239.K11D12.10a,6239.R31.1a,6239.T14G12.2,6239.T14G8.1,6239.ZC395.6,6239.ZK455.2,6239.ZK669.4,6239.ZK909.2c	age-1,tnt-3,mlc-1,sup-17,kcnl-2,che-3,gon-1,lrp-1,sel-10,tbg-1,syd-2,pdi-3,pdk-1,emb-9,apx-1,mlk-1,sma-1,aex-4,chd-3,gro-1,gcy-9,ZK669.4,kin-1
GO:0008340	Determination of adult lifespan	15	245	0.55	0.0228	6239.B0041.4,6239.B0334.8,6239.C12C8.1,6239.C27A7.4,6239.F43G6.9,6239.H26D21.1,6239.K11D12.10a,6239.R11E3.4,6239.T27E4.3,6239.T27E9.1a.1,6239.Y110A7A.10,6239.Y20F4.2,6239.Y41C4A.4g,6239.Y48E1B.1,6239.ZC395.6	rpl-4,age-1,hsp-70,che-11,patr-1,hus-1,mlk-1,set-15,hsp-16.48,ant-1.1,aap-1,crtc-1,crh-1,ddl-2,gro-1

## Sheet: d) kegg pathway
#term ID	term description	observed gene count	matching proteins in your network (IDs)
cel04144	Endocytosis	2	pkc-3
			ddl-2
cel00640	Propanoate metabolism	1	acox-1.4
cel04212	Longevity regulating pathway - worm	1	ddl-2
cel00592	alpha-Linolenic acid metabolism	1	acox-1.4
cel00410	beta-alanine metabolism	1	acox-1.4
cel04020	Calcium signaling pathway	1	mlck-1
cel01040	Biosynthesis of unsaturated fatty acids	1	acox-1.4
cel00071	Fatty acid degradation	1	acox-1.4
cel04146	Peroxisome	1	acox-1.4
cel01100	Metabolic pathways	1	acox-1.4
cel03010	Ribosome	1	mrps-14
cel01200	Carbon metabolism	1	acox-1.4
cel01212	Fatty acid metabolism	1	acox-1.4
UNIPROT ID	Genes	Protein name
O62139	acox-1.4	Acyl-coenzyme A oxidase
O18195	ddl-2	WASH_WAHD domain-containing protein
Q23260	mlck-1	Protein kinase domain-containing protein
P49391	mrps-14	Probable 40S ribosomal protein S14, mitochondrial
Q19266	pkc-3	Protein kinase C-like 3
